# Supplementary material for: GenTree, an integrated resource for analyzing the evolution and function of primate-specific coding genes
Source: HighWire-hosted journal article supplement (doi:10.1101/gr.238733.118), 2019-03-12
Supplement: Supplemental_Methods.docx [file Supplemental_Methods.docx]

# Supplemental Methods

## General gene dataset and computational tools

We used Ensembl v73 (October, 2013) ([Flicek et al. 2012](#_ENREF_20)) as our core gene set. The longest principle transcript was employed to represent each gene unless otherwise noted, since it is likely to be the most functionally important ([Rodriguez et al. 2015](#_ENREF_41)). We used MySQL v5.1.61 for storing and querying the data, BioPerl and BioEnsembl to assemble the pipeline, and R v3.2.3 ([Team 2007](#_ENREF_48)) to perform statistical analyses.

## Gene age dating

We employed our previously described synteny-based pipeline (SBP) ([Zhang et al. 2010a](#_ENREF_60); [Zhang et al. 2010b](#_ENREF_61)) [to date 20,300 Ensembl](#_ENREF_116) ([Flicek et al. 2012](#_ENREF_20)) annotated coding genes located on the major chromosomes (Fig. 1, Supplemental Table S3). Briefly, we first inferred the orthologs of all human genes in phylogenetically representative vertebrates (Supplemental Fig. S1) by taking advantage of the whole-genome alignment generated by the UCSC Genome Browser ([Kent et al. 2003](#_ENREF_30)). In accordance with the parsimony principle, we classified the transcripts based on their oldest exons into different age groups (Supplemental Fig. S1). The rational for this approach is that the oldest exon is usually most conserved across all exons and thus most likely functionally relevant. Furthermore, to be conservative, if different transcripts are assigned to different ages due to different exon composition, the oldest transcript was chosen to represent a gene. In this scenario, each transcript can be viewed in GenTree (Supplemental Fig. S22). In case of complete tandem duplications, the copy (usually the slowly evolving one) built into the syntenic chain was inferred as the old gene, while the other copy was considered as the derived new copy.

For a small percentage (838 or 4%) of genes, we believed that a reliable inference of the synteny is less likely. Therefore, we excluded these genes from dating. Two scenarios are considered. First, we excluded genes with majority (>70%) of exonic regions overlapping with RepeatMasker ([Smit et al. 2017](#_ENREF_44)) tracks of UCSC or genes situated on Y chromosomes. Second, for any gene of interest, we examined whether the phylogenetic distribution of orthologs was patchy. Taking the aforementioned *CHRFAM7A* as an example, the SBP detected discordant presence of ortholog along the phylogenetic tree (Supplemental Fig. S7). That is, the ortholog was present in orangutan but not in chimpanzee. For this gene, age was inferred under the Dollo parsimony (single gain) as the common ancestor of human and orangutan. However, our pipeline searched through all genes with the same age and found that genes sharing the same patchy distribution (candidate loss in chimpanzee) represents a rare event. We thus believed that the synteny of this gene is problematic and excluded it from dating. Ultimately, we assigned an evolutionary age to 19,462 (96%) Ensembl genes.

We examined the overlap between 838 masked genes and known synteny breaks ([Kemkemer et al. 2009](#_ENREF_28)), which were identified based on NCBI build 36. After lifting to GRCh37, we extracted 36 primate-specific breaks harboring a total of 82 protein-coding genes and found that 12 genes are masked.

In contrast to our previous studies ([Zhang et al. 2010a](#_ENREF_60); [Zhang et al. 2010b](#_ENREF_61)), we excluded the UCSC alignment blocks labeled as two-way non-syntenic (“nonsyn”) to rule out the influence of convergent duplication events occurring in different lineages.

Similar to coding genes, we also dated 14,134 pseudogenes based on the synteny, including 9,927 primate-specific pseudogenes. For *MYH16*, although the coding region was inferred as emerging on branch 2 (Supplemental Fig. S1), the indel in *MYH16* was known to postdate the human-chimpanzee split ([Stedman et al. 2004](#_ENREF_45)). Given the extensive study of this locus in the fields of evolutionary genetics and proteogenomics ([Branca et al. 2014](#_ENREF_6)), we manually merged it into the dataset of primate-specific pseudogenes (9,928 entries).

## Comparison across age datasets

We also loaded the age inferences for coding genes generated by phylostratigraphy ([Domazet-Lošo and Tautz 2010](#_ENREF_17)) [and ProteinHistorian](#_ENREF_27) ([Capra et al. 2012](#_ENREF_8)) into GenTree. Since ProteinHistorian integrated multiple different algorithms, we took the most frequently cited dataset based on PPODv4_PTHR7_OrthoMCL with Wagner parsimony ([Ramilowski et al. 2015](#_ENREF_40))[.](#_ENREF_80) Considering different reference species were used in these two datasets compared to GenTree, we called phylogenetically compatible ages between these datasets. For example, *GLUD1* showed a phylogenetically compatible age across three datasets (Supplemental Fig. S6).

To further evaluate the quality of our age dataset, we carefully chose three lists of human- or primate-specific genes considering the quality of dataset, the importance and representativeness of genes and methodological coverage. The first work was based on the latest human GRCh38 assembly, which was published recently ([Florio et al. 2018](#_ENREF_21)). The authors focused on genes preferentially expressed in progenitors of fetal human neocortex, which presumably contribute to human brain evolution. Guided by genome alignment based synteny, they identified 50 primate-specific genes. We mapped this list to our age data via gene symbols and recovered 42 entries annotated as protein-coding genes in Ensembl v73. We subsequently focused on these 42 (84%) genes.

The second list was also based on GRCh38, which focuses on human-specific segmental duplicates ([Dennis et al. 2017](#_ENREF_15)). The authors focused on 49 genes encoded by 15 duplication hotspots, which are associated with neurodevelopmental disorders. However, 25 of these gene models were predicted by this work and thus not included in the latest Ensembl release (v93) possibly because of the difficulty in differentiating pseudogenes and coding genes. We mapped the remaining 24 genes to v73 via symbols and found that only 14 (58%) genes have been annotated as protein-coding genes. Subsequently, we compared these 14 genes with our data.

For the last list, the authors focused on 14 primate-specific KZNFs based on NCBI build 36, which are highly expressed in human embryonic stem cells ([Thomas and Schneider 2011](#_ENREF_49); [Jacobs et al. 2014](#_ENREF_24)). We included this old list for three reasons: 1) KZNF is a family rapidly expanding in primate evolution (Supplemental Fig. S3); 2) different from our SBP and the above two lists, the authors inferred ages by building protein-level phylogenetic trees; 3) we can examine how the upgrade from NCBI 36 to GRCh37 (Ensembl v73) affects these KZNFs. All 14 (100%) KZNFs are retained as protein-coding genes in v73 and thus included in the comparison.

Notably, these three lists are somewhat non-overlapping due to different scope and gene annotations. For example, although both ([Florio et al. 2018](#_ENREF_21)) and ([Dennis et al. 2017](#_ENREF_15)) are interested in genes involved in brain development, only 4 genes are overlapping. In total, three datasets consist of 64 coding genes, which were used in the evaluations.

We compared the SBP with these three lists. For the conflicting cases between our age data and published datasets, we examined the UCSC synteny and searched the literature to understand which data is more creditable.

## Comparison between GRCh37 and GRCh38

Since Ensembl v73 is based on human genome assembly GRCh37, we wondered how our primate-specific genes (PSGs) are assembled in the latest GRCh38 and whether the change affects our functional enrichment analysis. We used the UCSC liftOver package to lift PSGs to GRCh38 and found that only 5% (45/846) of the genes could not be lifted with 100% coverage. Among these 45 genes, only 5 entries are supported by coding evidence, which comprise 2% of PSGs with coding potential. Furthermore, these 45 genes or 5 genes are scattered in different co-expression modules and thus do not disturb the overall enrichment patterns.

We also wondered whether there are a significant number of PSGs absent in Ensembl v73 or GRCh37. In fact, since PSGs often emerge by duplication, some of them may be collapsed in GRCh37, which has been rectified in GRCh38. To examine how strong this tendency is, we checked how our PSG list overlapped with two recently published high-quality PSG or human-specific genes (HSG) lists based on GRCh38 ([Dennis et al. 2017](#_ENREF_15); [Florio et al. 2018](#_ENREF_21)). Out of a total of 68 genes, only 8 (12%) gene models are unique to GRCh38, as demonstrated by different Ensembl gene IDs. More than that, 12% represents an upper-bound estimation of the proportion of PSGs poorly assembled in GRCh37 because: 1) both studies are designed to identify young genes involved in brain development; 2) human brain development appears to be a process enriched with recently evolved genes (HSGs), which are more likely to be collapsed in GRCh37. Thus, we concluded that GRCh37 already covered most (>88%) PSGs. The patterns we observed (testis, fetal brain, bone marrow and placenta bias) at least show 100% excess (Fig. 8, Supplemental Fig. S15), which are less likely to be significantly disturbed by a small fluctuation (<12% sample size).

## Inference of origination mechanisms

The details of the method for inferring gene origination mechanisms have been previously described ([Zhang et al. 2010a](#_ENREF_60); [Zhang et al. 2010b](#_ENREF_61)). In brief, we classified genes as DNA-mediated duplicates, retrogenes or de novo genes. For the two classes of duplicated genes, we integrated the whole-genome self-alignment generated by UCSC ([Kent et al. 2003](#_ENREF_30)) [and the all-against-all protein alignment via BLAST](#_ENREF_53) ([Altschul et al. 1990](#_ENREF_2)) to search for most similar paralogous copies. Intron loss events were employed to differentiate these two classes. Only BLAST hits that satisfy the following criteria are considered reliable: at least 70% coverage on both sides, an E-value less than 1x10-10 and identity greater than 50%. Otherwise, they were designated as “DNA-mediated like” or “RNA-mediated like”. Genes without identified paralogs were labeled as candidate de novo genes.

Since SBP dates genes at the DNA sequence level, the ages of primate-specific *de novo* genes are likely to be over-estimated if the DNA loci are more ancient (*e.g.*, *MYEOV*) ([Chen et al. 2015](#_ENREF_10)). To address this issue, we curated a list of *de novo* genes from recent literatures ([Chen et al. 2015](#_ENREF_10); [Ruiz-Orera et al. 2015](#_ENREF_42); [McLysaght and Hurst 2016](#_ENREF_36)). To be conservative, we only retained 18 entries that are annotated as coding genes in Ensembl v73.

## RNA-seq data processing

We first downloaded the HPA RNA-seq dataset for 27 tissues ([Uhlen et al. 2010](#_ENREF_50)). We stripped the adaptor and removed low-quality bases with Trimmomatic ([Bolger et al. 2014](#_ENREF_5)). We then used the splice-aware mapper STAR (v2.4.0k) ([Dobin et al. 2013](#_ENREF_16)) to align the reads to the human genome guided by the Ensembl annotation. We followed default parameter “1” for “outFilterMultimapScoreRange” to differentiate the one-base differences between paralogs. We then specified “quantMode” to provide the coordinate information of the transcripts in the alignment, which served as the input of the quantification software, RSEM (v1.2.19) ([Li and Dewey 2011](#_ENREF_33)). RSEM was chosen because it showed the highest performance when quantifying the expression of paralogs[. The](#_ENREF_10) FPKM values generated by RSEM were employed in the subsequent analyses ([Bray et al. 2016](#_ENREF_7)).

As a complementary data source, we also integrated the GTEx dataset ([Ardlie et al. 2015](#_ENREF_3)) covering 32 tissues. To control the heterogeneity, we picked 1,936 samples from individuals who is a European decedent with an age between 20 and 50 years old. We excluded those low-quality samples with RNA integrity (RIN) value less than 7. Similarly, the dataset is first trimmed via Trimmomatic. Because it consists of almost 2,000 samples, we performed quantification via a much faster tool, *i.e.*, Kallisto, which is believed to be able to differentiate paralogs too ([Bray et al. 2016](#_ENREF_7); [Dougherty et al. 2018](#_ENREF_18)).

To cover fetal brain samples, we finally integrated the BrainSpan transcriptome due to the expression bias of new genes in brain ([Tay et al. 2009](#_ENREF_47); [Zhang et al. 2011](#_ENREF_59); [Xie et al. 2012](#_ENREF_55)). Since BrainSpan does not provide raw sequencing data, we incorporated its pre-computed FPKM values directly into GenTree.

## *K*a/*K*s type analyses

As follows, we performed four types of tests. For significant (*P*<0.05) genes, we further performed multiple test corrections via the R package qvalue (<http://github.com/jdstorey/qvalue>) and kept only genes with *q*<0.05.

For the orthologous *K*a/*K*s test of coding genes, we extracted the orthologous sequences from the rhesus macaque according to ‘ortholog_one2one’ entries, which were annotated in the Ensembl comparative genomics resources ([Vilella et al. 2009](#_ENREF_51)). Genes without a reciprocal alignment in the rhesus macaque (UCSC assembly rheMac3) based on the UCSC synteny data were excluded. We generated the protein sequence alignment (PSA) using MAFFT v7.305b ([Katoh et al. 2002](#_ENREF_27)) and then translated this alignment to a codon sequence alignment via PAL2NAL v14 ([Suyama et al. 2006](#_ENREF_46)). Next, we ran codeml in the PAML 4.8 package ([Yang 2007](#_ENREF_56)) [to perform the likelihood ratio test (LRT) with the expectation of](#_ENREF_109)  *K*a/*K*s as 1 after excluding less reliable alignments with *K*a≥0.5 and/or *K*s≥5 ([Alba and Castresana 2005](#_ENREF_1))[. Alignment with a *K*s equal to 0 was also filtered out since it is difficult to estimate the *K*a/*K*s in these cases. We then examined the distribution of](#_ENREF_1) *K*s values and filtered out alignments with *K*s values exceeding 1.5-fold interquartile range. Since *K*s is often used to as a proxy for species divergence time, the candidate orthologs with outlier *K*s values may not represent *bona fide* orthologous genes.

For the paralogous *K*a/*K*s test, we constructed the PSA using BLAST (bl2seq 2.2.26) based on the parent-child gene relationship inferred above. We performed LRT with the expectation of 0.5 ([Betran et al. 2002](#_ENREF_4)). As in the orthologous alignments, we filtered the problematic alignments with extreme *K*a or *K*s values.

For the branch test, we focused on PSGs with a parental copy that predates primate and rodent split or emerges even earlier. At least one non-primate outgroup species was used whose UCSC genome assembly versions of these species were as follows: rabbit (oryCun2), guinea pig (cavPor3), mouse (mm10), rat (rn5), horse (equCab2), dog (canFam3), cow (bosTau7), elephant (loxAfr3), opossum (monDom5) and chicken (galGal3). We predicted the ortholog in reference species with human protein as the template and then built the codon-level alignment. We then performed similar *K*sfilter and tested whether the derived copy branch shows a *K*a/*K*s significantly smaller than 1. For the PSGs with a *K*a/*K*s smaller than 1, we observed an enrichment of olfactory receptors (ORs). ORs are known to be subject to recent losses in primate evolution ([Niimura et al. 2014](#_ENREF_38)) and thus they may appear to be under constraint in branch test. Therefore, we excluded pseudogenic entries identified by OR database (<https://senselab.med.yale.edu/ordb/>).

For the polymorphism-based test, we downloaded the latest phase3 data of the 1,000 Genomes Project (1000GP) ([The 1000 Genomes Project Consortium](#_ENREF_13)). We did not perform our own multiple-mapping filter since 1000GP already performed extensive accessibility mask ([The 1000 Genomes Project Consortium](#_ENREF_13)). We employed SnpEff version 4.0e ([Cingolani et al. 2012](#_ENREF_12)) to classify the synonymous and nonsynonymous SNPs. On the basis of the Ensembl v73 gene annotation file, we ran SnpEff with the flag ‘-onlyProtein’ to process protein-coding genes. We then performed a Fisher’s Exact Test with the expectation of 0.7 ([Moyers and Zhang 2016](#_ENREF_37))[.](#_ENREF_69)

For pseudogenes, we implemented the orthologous alignment-based *K*a/*K*s test. We retrieved 17,168 pseudogene entries (<http://tables.pseudogene.org/set.py?id=Human73>) ([Karro et al. 2007](#_ENREF_26))[, which were](#_ENREF_49) also based on Ensembl v73. To increase the accuracy, we focused on the 12,697 entries that were also annotated as pseudogenes by Ensembl. We inferred ORFs guided by the parent proteins for 3,538 pseudogenes that postdate the primate-rodent split, but predate human-rhesus monkey split, as supported by the SBP analysis. Specifically, for each human pseudogene, we parsed the UCSC syntenic alignment and extracted the orthologous alignments with the 10 kb up- and down-stream flanking regions between human and rhesus monkeys. We then took human protein as the template and translated both human and rhesus monkey nucleotides via exonerate ([Slater and Birney 2005](#_ENREF_43)). Next, we parsed out the longest existing ORF that was not disrupted by stop codons or frame shifts, built the PSA and performed subsequent analysis as performed for the annotated coding genes.

## Population-level positive selection analyses

GenTree integrates the PopHuman database ([Casillas et al. 2017](#_ENREF_9)), which is based on the phase3 data of 1000GP ([The 1000 Genomes Project Consortium](#_ENREF_13)). Among numerous tracks generated by PopHuman, we focused on three often-used tracks related with positive selection, which includes FST, XP-EHH and iHS. To maximize genetic diversity, we chose one African population (YRI, Yoruba in Ibadan, Nigeria) and two out-of-Africa populations including Europeans (CEU, Utah Residents with Northern and Western European Ancestry) and East Asians (CHB, Han Chinese in Beijing).

PopHuman calculated the scores for each 10 kb non-overlapping sliding windows across the genome. Possibly because of the low sequencing depth of 1000GP, prevalence of missing data causes that only 4,100-4,300 genes are covered by one of three tracks over 50% total exonic regions. Thus, we took a relaxed cutoff to require one gene with at least one exon covered by more than 50% regions. For each gene, the exon showing the highest score is used to represent this gene.

We then examined the genome-wide distribution of values of FST, XP-EHH and iHS, and determined the signal of selective sweeps as those greater than 95th percentile.

## Domain evolution

For each PSG, we extracted one-to-one orthologous genes from outgroup primates (chimpanzee, orangutan, gibbon, rhesus and marmoset, Supplemental Fig S1) guided by Ensembl ortholog annotation, which is based on phylogenetic tree analysis of proteins ([Vilella et al. 2009](#_ENREF_51)). To ensure the correct ortholog mapping, we further took advantage of the UCSC synteny data to filter these orthologs. Only orthologous genes annotated by Ensembl that were located in the orthologous regions of a human gene were considered valid.

For every gene, we retrieved the isoform encoding the longest protein to maximize the domain architecture. We used the “search_pfam.pl” script to identify domains based on the Pfam v31 database ([Finn et al. 2015](#_ENREF_19)). Herein, when parent (more general) or child (more specific) domains hit the same region, we only kept the more general domain annotations (Clan names) to remove redundancy.

By following the Dollo parsimony, we identified candidate domain gain or loss events by searching for differences in the domain counts of orthologous genes across six species. We identified 85 events and performed extensive manual curation for each case. Specifically, we lifted the annotation from Ensembl v73 to v93 to double-check the annotation of orthologous proteins in non-human primates. We also took advantage of the latest genome assembly (chimpanzee and orangutan) present on the UCSC test Genome Browser (<http://genome-test.cse.ucsc.edu>) to examine whether the gain or loss events could be explained by sequencing gaps. We finally estimated the annotation completeness by lifting exons from one species to the other species and examining the exon-level correspondence between orthologous proteins. Finally, we found that most (72) cases were caused by the following confounding factors (Supplemental Table 17): 1) orthologous proteins are well aligned, but the domain search only identified a hit in human, possibly because the model was built on human proteins; 2) the protein annotation was incomplete for orthologous proteins; 3) orthologous regions harbored assembly gaps; 4) ortholog mapping was wrong.

## Mass spectrometry data analyses

We downloaded high-resolution raw mass spectrometry data from the HPM project (<http://www.ebi.ac.uk/pride/archive/projects/PXD000561/>) ([Kim et al. 2014](#_ENREF_31)). This dataset covers up to 30 organs and cell types, and represents one of the largest proteome datasets for human. The process used to map the spectra to peptides largely followed the previously described method ([Kim et al. 2014](#_ENREF_31)). Briefly, we performed a parallel search against Ensembl v73 annotated proteins, three-frame-translated multi-exonic pseudogenes and six-frame-translated single-exonic pseudogenes by implementing pFind v2.8 ([Li et al. 2005](#_ENREF_34); [Wang et al. 2007](#_ENREF_52)) [and MaxQuant v1.5.3.30](#_ENREF_102) ([Cox and Mann 2008](#_ENREF_14))algorithms. The key differences relative to the previous method ([Kim et al. 2014](#_ENREF_31)) [were that we implemented free software (pFind and MaxQuant), and that we discarded peptides with more than 4 electric charges.](#_ENREF_54) The databases were searched in a target-decoy strategy to conduct false discovery rate (FDR) estimation. The FDR was controlled as 1% at the peptide spectrum match (PSM) and protein levels. In particular, the more rigorous group level FDR was estimated for peptides from PSGs when pFind was employed ([Fu and Qian 2014](#_ENREF_22); [Zhang et al. 2015](#_ENREF_57)).

We then implemented a series of filters to increase the mapping accuracy between paralogs by extending on previous work ([Wang et al. 2016](#_ENREF_53)). First, we discarded the PSMs in which peptides were mapped to multiple genes. Second, for the remaining PSMs, we employed BLAT ([Kent 2002](#_ENREF_29)) to align the peptides to the human genome (hg19) and Ensembl transcripts (in case blat fails to align exon-exon spanning peptides). Given the results from blat, we excluded peptides that were mapped to more than one genomic locations or transcripts of different genes. Third, because collision-induced dissociation is unable to distinguish between Isoleucine and Leucine, we excluded peptides where the only mismatches between the top 2 hits are Isoleucine *vs.* Leucine ([Zhang et al. 2013](#_ENREF_58)). Finally, for candidate misannotated pseudogenes, we added the following filters in order to be conservative: 1) the minimal ORF predicted by the coding paralog is more than 50 amino acids; 2) the differentiating amino acids should not be a polymorphic non-synonymous site in the paralogous protein, based on the 1000GP data. For PSGs and PSPGs, we further checked their PSMs manually and required presence of at least one high-quality mass spectrum.

After all these filters, we defined genes with at least two distinct peptides or one peptide supported by at least two PSMs as present given a certain algorithm. We took the intersection of pFind and MaxQuant as the final data for subsequent analyses.

## Co-expression network analysis

We constructed co-expression modules based on the HPA transcriptome data using WGCNA software (v1.51) ([Langfelder and Horvath 2008](#_ENREF_32)). The aforementioned RSEM FPKM values served as the input, which were then log2 transformed after adding a pseudo-count of 1 to avoid log transforming zero. We required genes to be present in at least one tissue, with a mean FPKM across replicates higher than 0.5, which represented robust transcription associated with active epigenetic marks in human ([Hart et al. 2013](#_ENREF_23)). We further filtered out genes with a CV (variance/mean) less than 0.08, which were considered to lack information and were generally excluded under WGCNA practices ([Kang et al. 2011](#_ENREF_25)). Our initial gene list consists of 20,343 entries, which includes 20,300 Ensembl v73 annotated proteins, 41 candidate misannotated pseudogenes inferred by this work and 2 misannotated pseudogenes reported in the literature (Fig. 5B, Supplemental Table S3). Among 20,343 genes, 18,574 (91%) were retained after CV filter for subsequent analyses (Supplemental Table S14).

We ran WGCNA according to the previously described parameters ([Parikshak et al. 2013](#_ENREF_39)), with the following modification: 1) we specified the soft threshold as 12 rather than 26 since the former is the smallest value resulting in a scale-free R2 fit of 0.85 (Supplemental Fig. S23A); and 2) to identify more modules while ensuring a decent module size, we set the deep split parameter and minimum module size in the cutreeHybrid function to 4 and 150, respectively. Modules were numbered in decreasing order with respect to the number of gene members. HM4 and HM17 were merged with HM16 due to their expressional similarity in the final stage as suggested by ([Parikshak et al. 2013](#_ENREF_39)). For modules with an excess of PSGs, we performed GO term enrichment analysis with the KOBAS server ([Xie et al. 2011](#_ENREF_54))[.](#_ENREF_106) WGCNA for GTEx data was performed in a similar way, except that the power was chosen as 20 (Supplemental Fig. S23B).

Gene lists of brain development co-expression modules from a previous study ([Parikshak et al. 2013](#_ENREF_39)) were downloaded. To account for Ensembl version differences, we only included the 15,557 genes that were covered by both ([Parikshak et al. 2013](#_ENREF_39)) and our dated protein-coding genes. Although numerous modules were identified in the original report, we focused on the 12 reproducible modules since the remaining modules are less reliable.

We measured centrality as the degree of the gene in the scale-free network, by summing its correlation coefficients to other genes. We performed this analysis within each module to avoid irrelevant connections. The degree of each gene was normalized by dividing the raw value by the maximum degree of that module, to avoid variation caused by differences in the module size ([Chou et al. 2014](#_ENREF_11))[.](#_ENREF_18)

## Association data analyses

We downloaded the GWAS records from GWASdb2 ([Li et al. 2016](#_ENREF_35)). We counted the number of SNPs identified by each study and excluded outlier studies with more than 130 SNPs. As a result, we removed approximately 10.5% of all studies. Moreover, studies purely focusing on gene expression variation were also excluded. Based on the criterion that SNP falls within 10 kb up- or down-stream of a gene, we linked the SNP-trait records to genes according to the chromosomal coordinate of SNP.

# Supporting references

Alba MM, Castresana J. 2005. Inverse relationship between evolutionary rate and age of mammalian genes. *Molecular biology and evolution* **22**: 598-606.

Altschul SF, Gish W, Miller W, Myers EW, Lipman DJ. 1990. Basic local alignment search tool. *Journal of molecular biology* **215**: 403-410.

Ardlie KG DeLuca DS Segre AV Sullivan TJ Young TR Gelfand ET Trowbridge CA Maller JB Tukiainen T Lek M et al. 2015. The Genotype-Tissue Expression (GTEx) pilot analysis: Multitissue gene regulation in humans. *Science* **348**: 648-660.

Betran E, Thornton K, Long M. 2002. Retroposed new genes out of the X in Drosophila. *Genome Res* **12**: 1854-1859.

Bolger AM, Lohse M, Usadel B. 2014. Trimmomatic: a flexible trimmer for Illumina sequence data. *Bioinformatics (Oxford, England)* **30**: 2114-2120.

Branca RM, Orre LM, Johansson HJ, Granholm V, Huss M, Perez-Bercoff A, Forshed J, Kall L, Lehtio J. 2014. HiRIEF LC-MS enables deep proteome coverage and unbiased proteogenomics. *Nat Methods* **11**: 59-62.

Bray NL, Pimentel H, Melsted P, Pachter L. 2016. Near-optimal probabilistic RNA-seq quantification. *Nat Biotechnol* **34**: 525.

Capra JA, Williams AG, Pollard KS. 2012. ProteinHistorian: tools for the comparative analysis of eukaryote protein origin. *PLoS Comput Biol* **8**: e1002567.

Casillas S, Mulet R, Villegas-Mirón P, Hervas S, Sanz E, Velasco D, Bertranpetit J, Laayouni H, Barbadilla A. 2017. PopHuman: the human population genomics browser. *Nucleic Acids Res* **46**: D1003-D1010.

Chen JY, Shen QS, Zhou WZ, Peng J, He BZ, Li Y, Liu CJ, Luan X, Ding W, Li S et al. 2015. Emergence, Retention and Selection: A Trilogy of Origination for Functional De Novo Proteins from Ancestral LncRNAs in Primates. *PLoS Genet* **11**: e1005391.

Chou WC, Cheng AL, Brotto M, Chuang CY. 2014. Visual gene-network analysis reveals the cancer gene co-expression in human endometrial cancer. *BMC Genomics* **15**: 300.

Cingolani P, Platts A, Wang le L, Coon M, Nguyen T, Wang L, Land SJ, Lu X, Ruden DM. 2012. A program for annotating and predicting the effects of single nucleotide polymorphisms, SnpEff: SNPs in the genome of Drosophila melanogaster strain w1118; iso-2; iso-3. *Fly* **6**: 80-92.

Cox J, Mann M. 2008. MaxQuant enables high peptide identification rates, individualized p.p.b.-range mass accuracies and proteome-wide protein quantification. *Nature biotechnology* **26**: 1367-1372.

Dennis MY, Harshman L, Nelson BJ, Penn O, Cantsilieris S, Huddleston J, Antonacci F, Penewit K, Denman L, Raja A. 2017. The evolution and population diversity of human-specific segmental duplications. *Nature ecology & evolution* **1**: 0069.

Dobin A, Davis CA, Schlesinger F, Drenkow J, Zaleski C, Jha S, Batut P, Chaisson M, Gingeras TR. 2013. STAR: ultrafast universal RNA-seq aligner. *Bioinformatics (Oxford, England)* **29**: 15-21.

Domazet-Lošo T, Tautz D. 2010. Phylostratigraphic tracking of cancer genes suggests a link to the emergence of multicellularity in metazoa. *BMC Biol* **8**: 66.

Dougherty ML, Underwood JG, Nelson BJ, Tseng E, Munson KM, Penn O, Nowakowski TJ, Pollen AA, Eichler EE. 2018. Transcriptional fates of human-specific segmental duplications in brain. *Genome Res*.

Finn RD, Coggill P, Eberhardt RY, Eddy SR, Mistry J, Mitchell AL, Potter SC, Punta M, Qureshi M, Sangrador-Vegas A. 2015. The Pfam protein families database: towards a more sustainable future. *Nucleic Acids Res* **44**: D279-D285.

Flicek P, Ahmed I, Amode MR, Barrell D, Beal K, Brent S, Carvalho-Silva D, Clapham P, Coates G, Fairley S et al. 2012. Ensembl 2013. *Nucleic Acids Research* **41**: D48-55.

Florio M, Heide M, Pinson A, Brandl H, Albert M, Winkler S, Wimberger P, Huttner WB, Hiller M. 2018. Evolution and cell-type specificity of human-specific genes preferentially expressed in progenitors of fetal neocortex. *Elife* **7**.

Fu Y, Qian X. 2014. Transferred subgroup false discovery rate for rare post-translational modifications detected by mass spectrometry. *Molecular & Cellular Proteomics* **13**: 1359-1368.

Hart T, Komori HK, LaMere S, Podshivalova K, Salomon DR. 2013. Finding the active genes in deep RNA-seq gene expression studies. *BMC genomics* **14**: 778.

Jacobs FMJ, Greenberg D, Nguyen N, Haeussler M, Ewing AD, Katzman S, Paten B, Salama SR, Haussler D. 2014. An evolutionary arms race between KRAB zinc-finger genes ZNF91/93 and SVA/L1 retrotransposons. *Nature* **516**: 242-+.

Kang HJ, Kawasawa YI, Cheng F, Zhu Y, Xu X, Li M, Sousa AM, Pletikos M, Meyer KA, Sedmak G et al. 2011. Spatio-temporal transcriptome of the human brain. *Nature* **478**: 483-489.

Karro JE, Yan Y, Zheng D, Zhang Z, Carriero N, Cayting P, Harrrison P, Gerstein M. 2007. Pseudogene.org: a comprehensive database and comparison platform for pseudogene annotation. *Nucleic Acids Res* **35**: D55-60.

Katoh K, Misawa K, Kuma K, Miyata T. 2002. MAFFT: a novel method for rapid multiple sequence alignment based on fast Fourier transform. *Nucleic Acids Res* **30**: 3059-3066.

Kemkemer C, Kohn M, Cooper DN, Froenicke L, Högel J, Hameister H, Kehrer-Sawatzki H. 2009. Gene synteny comparisons between different vertebrates provide new insights into breakage and fusion events during mammalian karyotype evolution. *BMC Evol Biol* **9**: 84.

Kent WJ. 2002. BLAT--the BLAST-like alignment tool. *Genome Res* **12**: 656-664.

Kent WJ, Baertsch R, Hinrichs A, Miller W, Haussler D. 2003. Evolution's cauldron: Duplication, deletion, and rearrangement in the mouse and human genomes. *Proc Natl Acad Sci U S A* **100**: 11484-11489.

Kim M-S, Pinto SM, Getnet D, Nirujogi RS, Manda SS, Chaerkady R, Madugundu AK, Kelkar DS, Isserlin R, Jain S. 2014. A draft map of the human proteome. *Nature* **509**: 575-581.

Langfelder P, Horvath S. 2008. WGCNA: an R package for weighted correlation network analysis. *BMC Bioinformatics* **9**: 559.

Li B, Dewey CN. 2011. RSEM: accurate transcript quantification from RNA-Seq data with or without a reference genome. *BMC bioinformatics* **12**: 323.

Li D, Fu Y, Sun R, Ling CX, Wei Y, Zhou H, Zeng R, Yang Q, He S, Gao W. 2005. pFind: a novel database-searching software system for automated peptide and protein identification via tandem mass spectrometry. *Bioinformatics (Oxford, England)* **21**: 3049-3050.

Li MJ, Liu Z, Wang P, Wong MP, Nelson MR, Kocher JP, Yeager M, Sham PC, Chanock SJ, Xia Z et al. 2016. GWASdb v2: an update database for human genetic variants identified by genome-wide association studies. *Nucleic Acids Res* **44**: D869-876.

McLysaght A, Hurst LD. 2016. Open questions in the study of de novo genes: what, how and why. *Nat Rev Genet* **17**: 567-578.

Moyers BA, Zhang J. 2016. Evaluating Phylostratigraphic Evidence for Widespread De Novo Gene Birth in Genome Evolution. *Molecular biology and evolution* **33**: 1245-1256.

Niimura Y, Matsui A, Touhara K. 2014. Extreme expansion of the olfactory receptor gene repertoire in African elephants and evolutionary dynamics of orthologous gene groups in 13 placental mammals. *Genome Res*: gr. 169532.169113.

Parikshak NN, Luo R, Zhang A, Won H, Lowe JK, Chandran V, Horvath S, Geschwind DH. 2013. Integrative functional genomic analyses implicate specific molecular pathways and circuits in autism. *Cell* **155**: 1008-1021.

Ramilowski JA, Goldberg T, Harshbarger J, Kloppmann E, Lizio M, Satagopam VP, Itoh M, Kawaji H, Carninci P, Rost B et al. 2015. A draft network of ligand-receptor-mediated multicellular signalling in human. *Nat Commun* **6**: 7866.

Rodriguez JM, Carro A, Valencia A, Tress ML. 2015. APPRIS WebServer and WebServices. *Nucleic Acids Res* **43**: W455-459.

Ruiz-Orera J, Hernandez-Rodriguez J, Chiva C, Sabido E, Kondova I, Bontrop R, Marques-Bonet T, Alba MM. 2015. Origins of De Novo Genes in Human and Chimpanzee. *PLoS Genet* **11**: e1005721.

Slater GS, Birney E. 2005. Automated generation of heuristics for biological sequence comparison. *BMC Bioinformatics* **6**: 31.

Smit A, Hubley R, Green P. 2017. 1996–2010. RepeatMasker Open-3.0.

Stedman HH, Kozyak BW, Nelson A, Thesier DM, Su LT, Low DW, Bridges CR, Shrager JB, Minugh-Purvis N, Mitchell MA. 2004. Myosin gene mutation correlates with anatomical changes in the human lineage. *Nature* **428**: 415-418.

Suyama M, Torrents D, Bork P. 2006. PAL2NAL: robust conversion of protein sequence alignments into the corresponding codon alignments. *Nucleic Acids Res* **34**: W609-612.

Tay SK, Blythe J, Lipovich L. 2009. Global discovery of primate-specific genes in the human genome. *Proc Natl Acad Sci U S A* **106**: 12019-12024.

Team RDC. 2007. R: A Language and Environment for Statistical Computing. <http://www.R-project.org>.

The 1000 Genomes Project Consortium. 2015. A global reference for human genetic variation. *Nature* **526**: 68.

Thomas JH, Schneider SE. 2011. Coevolution of retroelements and tandem zinc finger genes. *Genome Res*: gr. 121749.121111.

Uhlen M, Oksvold P, Fagerberg L, Lundberg E, Jonasson K, Forsberg M, Zwahlen M, Kampf C, Wester K, Hober S et al. 2010. Towards a knowledge-based Human Protein Atlas. *Nature biotechnology* **28**: 1248-1250.

Vilella AJ, Severin J, Ureta-Vidal A, Heng L, Durbin R, Birney E. 2009. EnsemblCompara GeneTrees: Complete, duplication-aware phylogenetic trees in vertebrates. *Genome Res* **19**: 327-335.

Wang LH, Li DQ, Fu Y, Wang HP, Zhang JF, Yuan ZF, Sun RX, Zeng R, He SM, Gao W. 2007. pFind 2.0: a software package for peptide and protein identification via tandem mass spectrometry. *Rapid communications in mass spectrometry : RCM* **21**: 2985-2991.

Wang X, Slebos RJ, Chambers MC, Tabb DL, Liebler DC, Zhang B. 2016. proBAMsuite, a Bioinformatics Framework for Genome-Based Representation and Analysis of Proteomics Data. *Molecular & cellular proteomics : MCP* **15**: 1164-1175.

Xie C, Mao X, Huang J, Ding Y, Wu J, Dong S, Kong L, Gao G, Li CY, Wei L. 2011. KOBAS 2.0: a web server for annotation and identification of enriched pathways and diseases. *Nucleic Acids Res* **39**: W316-322.

Xie C, Zhang YE, Chen JY, Liu CJ, Zhou WZ, Li Y, Zhang M, Zhang R, Wei L, Li CY. 2012. Hominoid-specific de novo protein-coding genes originating from long non-coding RNAs. *PLoS genetics* **8**: e1002942.

Yang Z. 2007. PAML 4: phylogenetic analysis by maximum likelihood. *Mol Biol Evol* **24**: 1586-1591.

Zhang K, Fu Y, Zeng WF, He K, Chi H, Liu C, Li YC, Gao Y, Xu P, He SM. 2015. A note on the false discovery rate of novel peptides in proteogenomics. *Bioinformatics (Oxford, England)* **31**: 3249-3253.

Zhang Y, Fonslow BR, Shan B, Baek MC, Yates JR, 3rd. 2013. Protein analysis by shotgun/bottom-up proteomics. *Chemical reviews* **113**: 2343-2394.

Zhang YE, Landback P, Vibranovski MD, Long M. 2011. Accelerated recruitment of new brain development genes into the human genome. *PLoS Biol* **9**: e1001179.

Zhang YE, Vibranovski MD, Krinsky BH, Long M. 2010a. Age-dependent chromosomal distribution of male-biased genes in Drosophila. *Genome Res* **20**: 1526-1533.

Zhang YE, Vibranovski MD, Landback P, Marais GAB, Long M. 2010b. Chromosomal Redistribution of Male-Biased Genes in Mammalian Evolution with Two Bursts of Gene Gain on the X Chromosome. *PLoS Biol* **8**: e1000494.
