# Supplementary material for: GenTree, an integrated resource for analyzing the evolution and function of primate-specific coding genes
Source: HighWire-hosted journal article supplement (doi:10.1101/gr.238733.118), 2019-03-12
Supplement: Supplemental_Table_.xlsx [file Supplemental_Table_.xlsx]

## Sheet: Supplemental_Table_S1
Supplemental Table S1. Primate-specific synteny breaks and associated genes.
Genes masked in SBP were labelled with "NA". The columns "Chrom", "Start" and "End" denote the positions of primate-specific synteny breaks.
Chrom	Start	End	Ensembl ID	Branch
Chr1	225743377	226163377	ENSG00000143742	2
Chr1	225743377	226163377	ENSG00000143768	0
Chr1	225743377	226163377	ENSG00000143811	4
Chr1	225743377	226163377	ENSG00000143819	0
Chr1	225743377	226163377	ENSG00000196187	0
Chr1	225743377	226163377	ENSG00000243709	3
Chr1	225743377	226163377	ENSG00000255835	NA
Chr1	226923377	227113377	ENSG00000143801	0
Chr2	114003530	114473530	ENSG00000136682	12
Chr2	114003530	114473530	ENSG00000144134	12
Chr2	114003530	114473530	ENSG00000184492	12
Chr2	114003530	114473530	ENSG00000238091	NA
Chr2	132353530	133283530	ENSG00000163046	11
Chr2	132353530	133283530	ENSG00000186825	11
Chr2	132353530	133283530	ENSG00000197927	10
Chr3	74537310	77087310	ENSG00000172969	10
Chr3	74537310	77087310	ENSG00000227124	7
Chr5	147589807	147689807	ENSG00000214510	5
Chr7	6673475	7083475	ENSG00000146574	NA
Chr7	6673475	7083475	ENSG00000164631	5
Chr7	6673475	7083475	ENSG00000169402	NA
Chr7	6673475	7083475	ENSG00000198580	5
Chr7	76062064	76562064	ENSG00000091073	0
Chr7	76062064	76562064	ENSG00000146707	10
Chr7	76062064	76562064	ENSG00000243566	2
Chr7	97312064	97422064	ENSG00000006128	1
Chr7	102062995	102192901	ENSG00000005075	0
Chr7	102062995	102192901	ENSG00000160991	0
Chr7	102062995	102192901	ENSG00000160993	0
Chr7	102062995	102192901	ENSG00000161036	0
Chr7	102062995	102192901	ENSG00000170667	2
Chr8	7832590	8172590	ENSG00000268955	11
Chr8	11722591	11992591	ENSG00000205882	5
Chr8	11722591	11992591	ENSG00000205883	5
Chr8	11722591	11992591	ENSG00000205884	5
Chr8	11722591	11992591	ENSG00000215343	NA
Chr8	11722591	11992591	ENSG00000233050	5
Chr8	11722591	11992591	ENSG00000255098	13
Chr9	38420000	39070000	ENSG00000180071	9
Chr9	95130179	95360179	ENSG00000106809	0
Chr9	95130179	95360179	ENSG00000106819	1
Chr9	95130179	95360179	ENSG00000106823	0
Chr9	95130179	95360179	ENSG00000127083	1
Chr9	97840179	98040179	ENSG00000158169	1
Chr10	27529994	27789994	ENSG00000182077	0
Chr10	35929994	37409994	ENSG00000229644	12
Chr10	88950020	89260020	ENSG00000184923	7
Chr10	88950020	89260020	ENSG00000214562	11
Chr11	3243424	3663424	ENSG00000005801	4
Chr11	3243424	3663424	ENSG00000167311	1
Chr11	3243424	3663424	ENSG00000184350	NA
Chr11	71262352	71642352	ENSG00000158483	12
Chr11	71262352	71642352	ENSG00000184276	12
Chr11	71262352	71642352	ENSG00000187811	12
Chr11	71262352	71642352	ENSG00000204571	NA
Chr11	71262352	71642352	ENSG00000204572	5
Chr11	71262352	71642352	ENSG00000254469	NA
Chr12	108145870	108505870	ENSG00000187855	0
Chr13	41242000	41502000	ENSG00000102738	0
Chr13	41242000	41502000	ENSG00000102743	0
Chr13	53161999	53221999	ENSG00000139675	NA
Chr15	32782708	32902708	ENSG00000232653	11
Chr15	102262477	102342477	ENSG00000259658	9
Chr16	31542499	32072499	ENSG00000185947	8
Chr16	31542499	32072499	ENSG00000197302	5
Chr16	31542499	32072499	ENSG00000223931	12
Chr17	6739276	6899276	ENSG00000215067	4
Chr17	20369408	20899408	ENSG00000205212	12
Chr17	20369408	20899408	ENSG00000214819	NA
Chr17	28855874	29055874	ENSG00000266733	10
Chr17	29285874	29425874	ENSG00000181481	3
Chr17	60145218	60456268	ENSG00000270033	12
Chr19	6989000	7019000	ENSG00000204752	9
Chr19	8839000	8929000	ENSG00000181733	5
Chr22	18650000	18760000	ENSG00000182824	13
Chr22	24980000	25110000	ENSG00000100031	0
Chr22	24980000	25110000	ENSG00000178026	0
Chr22	32500000	32780000	ENSG00000100191	NA
Chr22	32500000	32780000	ENSG00000128253	8
Chr22	32500000	32780000	ENSG00000128276	NA
Chr22	32500000	32780000	ENSG00000205853	7
Chr22	32500000	32780000	ENSG00000205856	9

## Sheet: Supplemental_Table_S2
Supplemental Table S2. Manual evaluation of SBP relative to three published datasets
Class	Scenario	Datasets
		Florio et al., 2018	Dennis et al., 2017	Jacobs et al., 2014
Comparable genes	Compatible age	ALG1L, CBWD2, GLUD2, PTTG2, ZNF100, ZNF724, ZNF222, ZNF726, ZNF732, ZNF43, ZNF730, ZNF93 , KIF4B, ZNF20, ZNF680, ZNF788, MT1E, ANKRD20A4, DHRS4L2, FAM72B, FAM72D, SMN2	SERF1B, SMN2, FAM72D, FAM72B, PTPN20A, CGR1B	ZNF91, ZNF93, ZNF714, ZNF721, ZNF254, ZNF587
	Older in SBP	CCDC74B, HEPN1, MT1M, 6HHLA3, TMEM99, C9orf47, SLFN13, ZNF695, BTN3A3, GTF2H2C	NAIP, GTF2H2C, CFC1B, BOLA2B, GTF2IRD2B	ZNF33A, ZNF544, ZNF589, ZNF460, ZNF90, ZNF443
	Not applicable	APOL2, APOL4, ZNF90, BTN3A2, MICA, ZNF816, TNFRSF10D, FAM182B, ANKRD20A2, ZNF492	GPR89B, GTF2H2, CHRFAM7A	ZNF519, ZNF486
Uncomparable genes	Noncoding gene models in Ensembl v73 and latest v93	NA	NCF1B, HIST2H2BC, HYDIN2, FCGR1C, NCF1C	NA
	Ensembl symbols have been changed	TMEM133, NBPF14, FAM72C, ARHGAP11B, NBPF10, NOTCH2NL, CBWD6	FAM72C, ARHGAP11B, SRGAP2D	NA
	Gene models were changed from non-coding (v73) to coding models (v93)	ZNF718	SRGAP2B, SRGAP2C	NA

## Sheet: Supplemental_Table_S3
Supplemental Table S3. Gene age inferences across different datasets
Note that for SBP and phylostratigraphy, a greater branch indicates a more recent origination, while for ProteinHistorian, a greater branch indicates a more ancient origination. SBP dated 777 primate-specific genes (PSGs, branches 8-13). 18 candidate de novo genes reported in the literatures were assigned to older branches (<8) or undated (Methods), which are highlighted in light yellow. For thes…
								False negative genes
Ensembl ID	SBP Branch	SBP Label	phylostratigraphy Branch	phylostratigraphy Label	ProteinHistorian Branch	ProteinHistorian Label	Branch in literatures	Corrected ages	Reason leading to false negatives
ENSG00000008517	3	Mammalia	17	Eutheria - Boreoeutheria	1	Homininae	12
ENSG00000149443	5	Eutheria	19	Euarchontoglires - Primates	1	Homininae	12
ENSG00000167747	5	Eutheria	17	Eutheria - Boreoeutheria	1	Homininae	11
ENSG00000172927	4	Theria	19	Euarchontoglires - Primates	1	Homininae	13
ENSG00000174407	2	Amniota	19	Euarchontoglires - Primates	1	Homininae	11
ENSG00000183250			19	Euarchontoglires - Primates	1	Homininae	11
ENSG00000198685	1	Tetrapoda	17	Eutheria - Boreoeutheria	1	Homininae	12
ENSG00000203930	5	Eutheria	19	Euarchontoglires - Primates			13
ENSG00000221953							13
ENSG00000221990	5	Eutheria					11
ENSG00000224186	0	Euteleostomi					12
ENSG00000244291	5	Eutheria					12
ENSG00000249016	4	Theria					12
ENSG00000253976	5	Eutheria					12
ENSG00000254440	4	Theria					13
ENSG00000257127	3	Mammalia					13
ENSG00000260456	5	Eutheria					12
ENSG00000263417	5	Eutheria					12
ENSG00000173530			4	Opisthokonta - Holozoa	2	Catarrhini		8	Tandem duplication family, which are masked in SBP; Has protein level evidence in UniProt; Age verified by Florio et al., 2018
ENSG00000250312								8	Gene model changed from Ensembl ver 73 to ver 93; Age verified by Florio et al., 2018
ENSG00000180257			1	Life before LCA of Cellular_organisms - Cellular organisms	12	Bilateria		9	Tandem duplication family, which are masked in SBP; Age verified by Florio et al., 2018
ENSG00000186470			7	Eumetazoa - Bilateria	0	HUMAN		9	Tandem duplication family, which are masked in SBP; Has protein level evidence in UniProt; Age verified by Florio et al., 2018
ENSG00000204520			11	Olfactores - Craniata	3	Euarchontoglires		9	Tandem duplication family, which are masked in SBP; Has protein level evidence in UniProt; Age verified by Florio et al., 2018
ENSG00000256229								9	Tandem duplication family, which are masked in SBP; Age verified by Jacobs et al., 2014
ENSG00000175322			1	Life before LCA of Cellular_organisms - Cellular organisms	1	Homininae		10	Gene model changed from Ensembl ver 73 to ver 93; Age verified by Jacobs et al., 2014
ENSG00000171943				Opisthokonta - Holozoa	8			13	Gene model changed from Ensembl ver 73 to ver 93; Age verified by Dennis et al., 2017
ENSG00000166664			5	Holozoa - Metazoa	12	Bilateria		13	Gene model changed from Ensembl ver 73 to ver 93; Age verified by Dennis et al., 2017
ENSG00000229676								13	Tandem duplication family, which are masked in SBP; Has protein level evidence in UniProt; Age verified by Florio et al., 2018
ENSG00000000003	0	Euteleostomi	2	Cellular organisms - Eukaryota	3	Euarchontoglires
ENSG00000000005	0	Euteleostomi	11	Olfactores - Craniata	7	Amniota
ENSG00000000419	0	Euteleostomi	1	Life before LCA of Cellular_organisms - Cellular organisms	15	Cellular_Organisms
ENSG00000000457	0	Euteleostomi	2	Cellular organisms - Eukaryota	11	Deuterostomia
ENSG00000000460	0	Euteleostomi	6	Metazoa - Eumetazoa	11	Deuterostomia
ENSG00000000938	0	Euteleostomi	1	Life before LCA of Cellular_organisms - Cellular organisms	11	Deuterostomia
ENSG00000000971	2	Amniota	4	Opisthokonta - Holozoa	8	Tetrapoda
ENSG00000001036	0	Euteleostomi	1	Life before LCA of Cellular_organisms - Cellular organisms	12	Bilateria
ENSG00000001084	0	Euteleostomi	2	Cellular organisms - Eukaryota	14	Eukaryota
ENSG00000001167	0	Euteleostomi	2	Cellular organisms - Eukaryota	9	Euteleostomi
ENSG00000001460	1	Tetrapoda	2	Cellular organisms - Eukaryota	6	Mammalia
ENSG00000001461	0	Euteleostomi	2	Cellular organisms - Eukaryota	9	Euteleostomi
ENSG00000001497	1	Tetrapoda	2	Cellular organisms - Eukaryota	7	Amniota
ENSG00000001561	0	Euteleostomi	1	Life before LCA of Cellular_organisms - Cellular organisms	8	Tetrapoda
ENSG00000001617	0	Euteleostomi	6	Metazoa - Eumetazoa	9	Euteleostomi
ENSG00000001626	0	Euteleostomi	1	Life before LCA of Cellular_organisms - Cellular organisms	14	Eukaryota
ENSG00000001629	0	Euteleostomi	1	Life before LCA of Cellular_organisms - Cellular organisms	7	Amniota
ENSG00000001630	0	Euteleostomi	1	Life before LCA of Cellular_organisms - Cellular organisms	14	Eukaryota
ENSG00000001631	0	Euteleostomi	1	Life before LCA of Cellular_organisms - Cellular organisms	11	Deuterostomia
ENSG00000002016	0	Euteleostomi	1	Life before LCA of Cellular_organisms - Cellular organisms	9	Euteleostomi
ENSG00000002330	3	Mammalia	12	Craniata - Euteleostomi	4	Eutheria
ENSG00000002549	0	Euteleostomi	1	Life before LCA of Cellular_organisms - Cellular organisms	15	Cellular_Organisms
ENSG00000002586			13	Euteleostomi - Tetrapoda	0	HUMAN
ENSG00000002587	0	Euteleostomi	1	Life before LCA of Cellular_organisms - Cellular organisms	9	Euteleostomi
ENSG00000002726	0	Euteleostomi	1	Life before LCA of Cellular_organisms - Cellular organisms	9	Euteleostomi
ENSG00000002745	0	Euteleostomi	5	Holozoa - Metazoa	9	Euteleostomi
ENSG00000002746	0	Euteleostomi	2	Cellular organisms - Eukaryota	12	Bilateria
ENSG00000002822	0	Euteleostomi	1	Life before LCA of Cellular_organisms - Cellular organisms	11	Deuterostomia
ENSG00000002834	0	Euteleostomi	2	Cellular organisms - Eukaryota	12	Bilateria
ENSG00000002919	0	Euteleostomi	2	Cellular organisms - Eukaryota	9	Euteleostomi
ENSG00000002933	3	Mammalia	11	Olfactores - Craniata	1	Homininae
ENSG00000003056	0	Euteleostomi	2	Cellular organisms - Eukaryota	11	Deuterostomia
ENSG00000003096	1	Tetrapoda	1	Life before LCA of Cellular_organisms - Cellular organisms	11	Deuterostomia
ENSG00000003137	0	Euteleostomi	1	Life before LCA of Cellular_organisms - Cellular organisms	11	Deuterostomia
ENSG00000003147	1	Tetrapoda	5	Holozoa - Metazoa	12	Bilateria
ENSG00000003249	0	Euteleostomi	11	Olfactores - Craniata	8	Tetrapoda
ENSG00000003393	0	Euteleostomi	1	Life before LCA of Cellular_organisms - Cellular organisms	8	Tetrapoda
ENSG00000003400	1	Tetrapoda	5	Holozoa - Metazoa	11	Deuterostomia
ENSG00000003402	1	Tetrapoda	5	Holozoa - Metazoa	7	Amniota
ENSG00000003436	0	Euteleostomi	1	Life before LCA of Cellular_organisms - Cellular organisms	10	Chordata
ENSG00000003509	0	Euteleostomi	1	Life before LCA of Cellular_organisms - Cellular organisms	14	Eukaryota
ENSG00000003756	0	Euteleostomi	2	Cellular organisms - Eukaryota	12	Bilateria
ENSG00000003987	0	Euteleostomi	2	Cellular organisms - Eukaryota	12	Bilateria
ENSG00000003989	0	Euteleostomi	1	Life before LCA of Cellular_organisms - Cellular organisms	11	Deuterostomia
ENSG00000004059	0	Euteleostomi	1	Life before LCA of Cellular_organisms - Cellular organisms	14	Eukaryota
ENSG00000004139	0	Euteleostomi	1	Life before LCA of Cellular_organisms - Cellular organisms	12	Bilateria
ENSG00000004142	0	Euteleostomi	1	Life before LCA of Cellular_organisms - Cellular organisms	12	Bilateria
ENSG00000004399	0	Euteleostomi	1	Life before LCA of Cellular_organisms - Cellular organisms	12	Bilateria
ENSG00000004455	0	Euteleostomi	1	Life before LCA of Cellular_organisms - Cellular organisms	15	Cellular_Organisms
ENSG00000004468	3	Mammalia	6	Metazoa - Eumetazoa	8	Tetrapoda
ENSG00000004478	0	Euteleostomi	1	Life before LCA of Cellular_organisms - Cellular organisms	14	Eukaryota
ENSG00000004487	0	Euteleostomi	1	Life before LCA of Cellular_organisms - Cellular organisms	12	Bilateria
ENSG00000004534	1	Tetrapoda	1	Life before LCA of Cellular_organisms - Cellular organisms	7	Amniota
ENSG00000004660	0	Euteleostomi	1	Life before LCA of Cellular_organisms - Cellular organisms	14	Eukaryota
ENSG00000004700	0	Euteleostomi	1	Life before LCA of Cellular_organisms - Cellular organisms	15	Cellular_Organisms
ENSG00000004766	0	Euteleostomi	2	Cellular organisms - Eukaryota	12	Bilateria
ENSG00000004776			6	Metazoa - Eumetazoa	5	Theria
ENSG00000004777	1	Tetrapoda	1	Life before LCA of Cellular_organisms - Cellular organisms	10	Chordata
ENSG00000004779	0	Euteleostomi	1	Life before LCA of Cellular_organisms - Cellular organisms	9	Euteleostomi
ENSG00000004799	0	Euteleostomi	1	Life before LCA of Cellular_organisms - Cellular organisms	12	Bilateria
ENSG00000004809	0	Euteleostomi	1	Life before LCA of Cellular_organisms - Cellular organisms	9	Euteleostomi
ENSG00000004838	0	Euteleostomi	2	Cellular organisms - Eukaryota	11	Deuterostomia
ENSG00000004846	1	Tetrapoda	1	Life before LCA of Cellular_organisms - Cellular organisms	15	Cellular_Organisms
ENSG00000004848	0	Euteleostomi	2	Cellular organisms - Eukaryota	9	Euteleostomi
ENSG00000004864	0	Euteleostomi	2	Cellular organisms - Eukaryota	12	Bilateria
ENSG00000004866	0	Euteleostomi	5	Holozoa - Metazoa	12	Bilateria
ENSG00000004897	0	Euteleostomi	1	Life before LCA of Cellular_organisms - Cellular organisms	14	Eukaryota
ENSG00000004939	0	Euteleostomi	1	Life before LCA of Cellular_organisms - Cellular organisms	12	Bilateria
ENSG00000004948	0	Euteleostomi	2	Cellular organisms - Eukaryota	5	Theria
ENSG00000004961	0	Euteleostomi	2	Cellular organisms - Eukaryota	13	Opisthokonta
ENSG00000004975	0	Euteleostomi	3	Eukaryota - Opisthokonta	12	Bilateria
ENSG00000005001	1	Tetrapoda	1	Life before LCA of Cellular_organisms - Cellular organisms	6	Mammalia
ENSG00000005007	0	Euteleostomi	1	Life before LCA of Cellular_organisms - Cellular organisms	14	Eukaryota
ENSG00000005020	0	Euteleostomi	2	Cellular organisms - Eukaryota	11	Deuterostomia
ENSG00000005022	0	Euteleostomi	2	Cellular organisms - Eukaryota	14	Eukaryota
ENSG00000005059	0	Euteleostomi	2	Cellular organisms - Eukaryota	0	HUMAN
ENSG00000005073	0	Euteleostomi	2	Cellular organisms - Eukaryota	8	Tetrapoda
ENSG00000005075	0	Euteleostomi	1	Life before LCA of Cellular_organisms - Cellular organisms	14	Eukaryota
ENSG00000005100	0	Euteleostomi	1	Life before LCA of Cellular_organisms - Cellular organisms	11	Deuterostomia
ENSG00000005102	0	Euteleostomi	2	Cellular organisms - Eukaryota	5	Theria
ENSG00000005108	0	Euteleostomi	2	Cellular organisms - Eukaryota	9	Euteleostomi
ENSG00000005156	0	Euteleostomi	1	Life before LCA of Cellular_organisms - Cellular organisms	11	Deuterostomia
ENSG00000005175	0	Euteleostomi	1	Life before LCA of Cellular_organisms - Cellular organisms	14	Eukaryota
ENSG00000005187	1	Tetrapoda	1	Life before LCA of Cellular_organisms - Cellular organisms	8	Tetrapoda
ENSG00000005189	1	Tetrapoda	2	Cellular organisms - Eukaryota
ENSG00000005194	0	Euteleostomi	2	Cellular organisms - Eukaryota	14	Eukaryota
ENSG00000005238	0	Euteleostomi	2	Cellular organisms - Eukaryota	5	Theria
ENSG00000005243	4	Theria	2	Cellular organisms - Eukaryota	5	Theria
ENSG00000005249	0	Euteleostomi	1	Life before LCA of Cellular_organisms - Cellular organisms	13	Opisthokonta
ENSG00000005302	0	Euteleostomi	2	Cellular organisms - Eukaryota	11	Deuterostomia
ENSG00000005339	0	Euteleostomi	2	Cellular organisms - Eukaryota	12	Bilateria
ENSG00000005379	0	Euteleostomi	1	Life before LCA of Cellular_organisms - Cellular organisms	7	Amniota
ENSG00000005381	0	Euteleostomi	1	Life before LCA of Cellular_organisms - Cellular organisms	10	Chordata
ENSG00000005421	5	Eutheria	1	Life before LCA of Cellular_organisms - Cellular organisms	9	Euteleostomi
ENSG00000005436	0	Euteleostomi	2	Cellular organisms - Eukaryota	4	Eutheria
ENSG00000005448	0	Euteleostomi	1	Life before LCA of Cellular_organisms - Cellular organisms	5	Theria
ENSG00000005469	0	Euteleostomi	1	Life before LCA of Cellular_organisms - Cellular organisms	12	Bilateria
ENSG00000005471	0	Euteleostomi	1	Life before LCA of Cellular_organisms - Cellular organisms	15	Cellular_Organisms
ENSG00000005483	0	Euteleostomi	1	Life before LCA of Cellular_organisms - Cellular organisms	0	HUMAN
ENSG00000005486	1	Tetrapoda	13	Euteleostomi - Tetrapoda	8	Tetrapoda
ENSG00000005513	0	Euteleostomi	2	Cellular organisms - Eukaryota	9	Euteleostomi
ENSG00000005700	0	Euteleostomi	1	Life before LCA of Cellular_organisms - Cellular organisms	10	Chordata
ENSG00000005801	4	Theria	1	Life before LCA of Cellular_organisms - Cellular organisms	2	Catarrhini
ENSG00000005810	0	Euteleostomi	1	Life before LCA of Cellular_organisms - Cellular organisms	12	Bilateria
ENSG00000005812	0	Euteleostomi	3	Eukaryota - Opisthokonta	9	Euteleostomi
ENSG00000005844	3	Mammalia	1	Life before LCA of Cellular_organisms - Cellular organisms	6	Mammalia
ENSG00000005882	2	Amniota	1	Life before LCA of Cellular_organisms - Cellular organisms	12	Bilateria
ENSG00000005884	0	Euteleostomi	1	Life before LCA of Cellular_organisms - Cellular organisms	12	Bilateria
ENSG00000005889	0	Euteleostomi	2	Cellular organisms - Eukaryota	9	Euteleostomi
ENSG00000005893	0	Euteleostomi	6	Metazoa - Eumetazoa	10	Chordata
ENSG00000005955	0	Euteleostomi	2	Cellular organisms - Eukaryota	11	Deuterostomia
ENSG00000005961	0	Euteleostomi	1	Life before LCA of Cellular_organisms - Cellular organisms	12	Bilateria
ENSG00000005981	0	Euteleostomi	1	Life before LCA of Cellular_organisms - Cellular organisms	9	Euteleostomi
ENSG00000006007	0	Euteleostomi	1	Life before LCA of Cellular_organisms - Cellular organisms	12	Bilateria
ENSG00000006015	3	Mammalia	16	Mammalia - Eutheria	4	Eutheria
ENSG00000006016	0	Euteleostomi	9	Deuterostomia - Chordata	9	Euteleostomi
ENSG00000006025	0	Euteleostomi	2	Cellular organisms - Eukaryota	9	Euteleostomi
ENSG00000006042	0	Euteleostomi	7	Eumetazoa - Bilateria	9	Euteleostomi
ENSG00000006047	1	Tetrapoda	1	Life before LCA of Cellular_organisms - Cellular organisms	5	Theria
ENSG00000006059	4	Theria	1	Life before LCA of Cellular_organisms - Cellular organisms	6	Mammalia
ENSG00000006071	0	Euteleostomi	1	Life before LCA of Cellular_organisms - Cellular organisms	14	Eukaryota
ENSG00000006074	5	Eutheria	11	Olfactores - Craniata	2	Catarrhini
ENSG00000006075	4	Theria	11	Olfactores - Craniata	7	Amniota
ENSG00000006114	0	Euteleostomi	1	Life before LCA of Cellular_organisms - Cellular organisms	11	Deuterostomia
ENSG00000006116	0	Euteleostomi	7	Eumetazoa - Bilateria	8	Tetrapoda
ENSG00000006118	1	Tetrapoda	4	Opisthokonta - Holozoa	4	Eutheria
ENSG00000006125	1	Tetrapoda	2	Cellular organisms - Eukaryota	14	Eukaryota
ENSG00000006128	1	Tetrapoda	12	Craniata - Euteleostomi	9	Euteleostomi
ENSG00000006194	3	Mammalia	2	Cellular organisms - Eukaryota	6	Mammalia
ENSG00000006210	3	Mammalia	12	Craniata - Euteleostomi	6	Mammalia
ENSG00000006282	0	Euteleostomi	1	Life before LCA of Cellular_organisms - Cellular organisms	12	Bilateria
ENSG00000006283	0	Euteleostomi	1	Life before LCA of Cellular_organisms - Cellular organisms	12	Bilateria
ENSG00000006327	3	Mammalia	15	Amniota - Mammalia	6	Mammalia
ENSG00000006377	0	Euteleostomi	2	Cellular organisms - Eukaryota	10	Chordata
ENSG00000006432	0	Euteleostomi	1	Life before LCA of Cellular_organisms - Cellular organisms	11	Deuterostomia
ENSG00000006451	0	Euteleostomi	1	Life before LCA of Cellular_organisms - Cellular organisms	12	Bilateria
ENSG00000006453	0	Euteleostomi	2	Cellular organisms - Eukaryota
ENSG00000006459	0	Euteleostomi	2	Cellular organisms - Eukaryota	9	Euteleostomi
ENSG00000006468	0	Euteleostomi	5	Holozoa - Metazoa	9	Euteleostomi
ENSG00000006530	0	Euteleostomi	1	Life before LCA of Cellular_organisms - Cellular organisms	12	Bilateria
ENSG00000006534	1	Tetrapoda	1	Life before LCA of Cellular_organisms - Cellular organisms	14	Eukaryota
ENSG00000006555	0	Euteleostomi	9	Deuterostomia - Chordata	5	Theria
ENSG00000006576	0	Euteleostomi	6	Metazoa - Eumetazoa	11	Deuterostomia
ENSG00000006606	4	Theria	11	Olfactores - Craniata	5	Theria
ENSG00000006607	0	Euteleostomi	2	Cellular organisms - Eukaryota	12	Bilateria
ENSG00000006611	0	Euteleostomi	1	Life before LCA of Cellular_organisms - Cellular organisms	7	Amniota
ENSG00000006625	0	Euteleostomi	1	Life before LCA of Cellular_organisms - Cellular organisms	12	Bilateria
ENSG00000006634	1	Tetrapoda	2	Cellular organisms - Eukaryota	8	Tetrapoda
ENSG00000006638	0	Euteleostomi	9	Deuterostomia - Chordata	9	Euteleostomi
ENSG00000006652	0	Euteleostomi	2	Cellular organisms - Eukaryota	10	Chordata
ENSG00000006659	8	Simiiformes	7	Eumetazoa - Bilateria	0	HUMAN
ENSG00000006695	0	Euteleostomi	1	Life before LCA of Cellular_organisms - Cellular organisms	15	Cellular_Organisms
ENSG00000006704	0	Euteleostomi	8	Bilateria - Deuterostomia	6	Mammalia
ENSG00000006712	0	Euteleostomi	2	Cellular organisms - Eukaryota	5	Theria
ENSG00000006715	0	Euteleostomi	2	Cellular organisms - Eukaryota	14	Eukaryota
ENSG00000006740	0	Euteleostomi	2	Cellular organisms - Eukaryota	12	Bilateria
ENSG00000006744	0	Euteleostomi	1	Life before LCA of Cellular_organisms - Cellular organisms	14	Eukaryota
ENSG00000006747	1	Tetrapoda	2	Cellular organisms - Eukaryota	12	Bilateria
ENSG00000006756	0	Euteleostomi	1	Life before LCA of Cellular_organisms - Cellular organisms	9	Euteleostomi
ENSG00000006757	1	Tetrapoda	2	Cellular organisms - Eukaryota	9	Euteleostomi
ENSG00000006788	1	Tetrapoda	1	Life before LCA of Cellular_organisms - Cellular organisms	13	Opisthokonta
ENSG00000006831	0	Euteleostomi	1	Life before LCA of Cellular_organisms - Cellular organisms	14	Eukaryota
ENSG00000006837	3	Mammalia	1	Life before LCA of Cellular_organisms - Cellular organisms	6	Mammalia
ENSG00000007001	0	Euteleostomi	1	Life before LCA of Cellular_organisms - Cellular organisms	12	Bilateria
ENSG00000007038			1	Life before LCA of Cellular_organisms - Cellular organisms	5	Theria
ENSG00000007047	0	Euteleostomi	1	Life before LCA of Cellular_organisms - Cellular organisms	12	Bilateria
ENSG00000007062	0	Euteleostomi	6	Metazoa - Eumetazoa	12	Bilateria
ENSG00000007080	0	Euteleostomi	2	Cellular organisms - Eukaryota	14	Eukaryota
ENSG00000007129	10	Hominoidea	7	Eumetazoa - Bilateria	0	HUMAN
ENSG00000007168	0	Euteleostomi	1	Life before LCA of Cellular_organisms - Cellular organisms	12	Bilateria
ENSG00000007171	1	Tetrapoda	1	Life before LCA of Cellular_organisms - Cellular organisms	11	Deuterostomia
ENSG00000007174	0	Euteleostomi	2	Cellular organisms - Eukaryota	14	Eukaryota
ENSG00000007202	0	Euteleostomi	2	Cellular organisms - Eukaryota	12	Bilateria
ENSG00000007216	0	Euteleostomi	1	Life before LCA of Cellular_organisms - Cellular organisms	12	Bilateria
ENSG00000007237	0	Euteleostomi	2	Cellular organisms - Eukaryota	5	Theria
ENSG00000007255	3	Mammalia	2	Cellular organisms - Eukaryota	14	Eukaryota
ENSG00000007264	0	Euteleostomi	1	Life before LCA of Cellular_organisms - Cellular organisms	7	Amniota
ENSG00000007306			6	Metazoa - Eumetazoa	0	HUMAN
ENSG00000007312	3	Mammalia	12	Craniata - Euteleostomi	7	Amniota
ENSG00000007314	1	Tetrapoda	1	Life before LCA of Cellular_organisms - Cellular organisms	11	Deuterostomia
ENSG00000007341	0	Euteleostomi	1	Life before LCA of Cellular_organisms - Cellular organisms	12	Bilateria
ENSG00000007350	1	Tetrapoda	1	Life before LCA of Cellular_organisms - Cellular organisms	15	Cellular_Organisms
ENSG00000007372	0	Euteleostomi	2	Cellular organisms - Eukaryota	10	Chordata
ENSG00000007376	0	Euteleostomi	1	Life before LCA of Cellular_organisms - Cellular organisms	5	Theria
ENSG00000007384	0	Euteleostomi	1	Life before LCA of Cellular_organisms - Cellular organisms	12	Bilateria
ENSG00000007392	0	Euteleostomi	2	Cellular organisms - Eukaryota	13	Opisthokonta
ENSG00000007402	0	Euteleostomi	1	Life before LCA of Cellular_organisms - Cellular organisms	9	Euteleostomi
ENSG00000007516	0	Euteleostomi	2	Cellular organisms - Eukaryota	12	Bilateria
ENSG00000007520	0	Euteleostomi	1	Life before LCA of Cellular_organisms - Cellular organisms	15	Cellular_Organisms
ENSG00000007541	0	Euteleostomi	2	Cellular organisms - Eukaryota	13	Opisthokonta
ENSG00000007545	0	Euteleostomi	2	Cellular organisms - Eukaryota	10	Chordata
ENSG00000007866	0	Euteleostomi	3	Eukaryota - Opisthokonta	12	Bilateria
ENSG00000007908	0	Euteleostomi	2	Cellular organisms - Eukaryota	7	Amniota
ENSG00000007923	0	Euteleostomi	1	Life before LCA of Cellular_organisms - Cellular organisms	12	Bilateria
ENSG00000007933	1	Tetrapoda	1	Life before LCA of Cellular_organisms - Cellular organisms	14	Eukaryota
ENSG00000007944	0	Euteleostomi	2	Cellular organisms - Eukaryota	11	Deuterostomia
ENSG00000007952	0	Euteleostomi	1	Life before LCA of Cellular_organisms - Cellular organisms	11	Deuterostomia
ENSG00000007968	0	Euteleostomi	2	Cellular organisms - Eukaryota	6	Mammalia
ENSG00000008018	0	Euteleostomi	1	Life before LCA of Cellular_organisms - Cellular organisms	14	Eukaryota
ENSG00000008056	0	Euteleostomi	1	Life before LCA of Cellular_organisms - Cellular organisms	5	Theria
ENSG00000008083	0	Euteleostomi	2	Cellular organisms - Eukaryota	9	Euteleostomi
ENSG00000008086	0	Euteleostomi	1	Life before LCA of Cellular_organisms - Cellular organisms	11	Deuterostomia
ENSG00000008118	0	Euteleostomi	1	Life before LCA of Cellular_organisms - Cellular organisms	9	Euteleostomi
ENSG00000008128			1	Life before LCA of Cellular_organisms - Cellular organisms	0	HUMAN
ENSG00000008130	0	Euteleostomi	1	Life before LCA of Cellular_organisms - Cellular organisms	15	Cellular_Organisms
ENSG00000008196	0	Euteleostomi	5	Holozoa - Metazoa	8	Tetrapoda
ENSG00000008197	0	Euteleostomi	5	Holozoa - Metazoa	7	Amniota
ENSG00000008226	0	Euteleostomi	2	Cellular organisms - Eukaryota	11	Deuterostomia
ENSG00000008256	0	Euteleostomi	1	Life before LCA of Cellular_organisms - Cellular organisms	12	Bilateria
ENSG00000008277	0	Euteleostomi	1	Life before LCA of Cellular_organisms - Cellular organisms	9	Euteleostomi
ENSG00000008282	1	Tetrapoda	6	Metazoa - Eumetazoa	9	Euteleostomi
ENSG00000008283	0	Euteleostomi	2	Cellular organisms - Eukaryota	5	Theria
ENSG00000008294	0	Euteleostomi	2	Cellular organisms - Eukaryota	12	Bilateria
ENSG00000008300	0	Euteleostomi	1	Life before LCA of Cellular_organisms - Cellular organisms	14	Eukaryota
ENSG00000008311	0	Euteleostomi	1	Life before LCA of Cellular_organisms - Cellular organisms	13	Opisthokonta
ENSG00000008323	3	Mammalia	2	Cellular organisms - Eukaryota	5	Theria
ENSG00000008324	4	Theria	2	Cellular organisms - Eukaryota	0	HUMAN
ENSG00000008382	0	Euteleostomi	2	Cellular organisms - Eukaryota	11	Deuterostomia
ENSG00000008394	0	Euteleostomi	1	Life before LCA of Cellular_organisms - Cellular organisms	11	Deuterostomia
ENSG00000008405	0	Euteleostomi	1	Life before LCA of Cellular_organisms - Cellular organisms	14	Eukaryota
ENSG00000008438	4	Theria	1	Life before LCA of Cellular_organisms - Cellular organisms	5	Theria
ENSG00000008441	0	Euteleostomi	5	Holozoa - Metazoa	8	Tetrapoda
ENSG00000008513	0	Euteleostomi	2	Cellular organisms - Eukaryota	9	Euteleostomi
ENSG00000008516	1	Tetrapoda	1	Life before LCA of Cellular_organisms - Cellular organisms	0	HUMAN
ENSG00000008710	0	Euteleostomi	1	Life before LCA of Cellular_organisms - Cellular organisms	10	Chordata
ENSG00000008735	0	Euteleostomi	4	Opisthokonta - Holozoa	9	Euteleostomi
ENSG00000008838	0	Euteleostomi	2	Cellular organisms - Eukaryota	11	Deuterostomia
ENSG00000008853	0	Euteleostomi	1	Life before LCA of Cellular_organisms - Cellular organisms	11	Deuterostomia
ENSG00000008869	0	Euteleostomi	2	Cellular organisms - Eukaryota	13	Opisthokonta
ENSG00000008952	0	Euteleostomi	2	Cellular organisms - Eukaryota	13	Opisthokonta
ENSG00000008988	0	Euteleostomi	1	Life before LCA of Cellular_organisms - Cellular organisms	15	Cellular_Organisms
ENSG00000009307	0	Euteleostomi	2	Cellular organisms - Eukaryota	11	Deuterostomia
ENSG00000009335	0	Euteleostomi	2	Cellular organisms - Eukaryota	13	Opisthokonta
ENSG00000009413	0	Euteleostomi	1	Life before LCA of Cellular_organisms - Cellular organisms	14	Eukaryota
ENSG00000009694	0	Euteleostomi	1	Life before LCA of Cellular_organisms - Cellular organisms	12	Bilateria
ENSG00000009709	0	Euteleostomi	2	Cellular organisms - Eukaryota	9	Euteleostomi
ENSG00000009724	0	Euteleostomi	1	Life before LCA of Cellular_organisms - Cellular organisms	0	HUMAN
ENSG00000009765	0	Euteleostomi	1	Life before LCA of Cellular_organisms - Cellular organisms	8	Tetrapoda
ENSG00000009780	2	Amniota	2	Cellular organisms - Eukaryota	12	Bilateria
ENSG00000009790	1	Tetrapoda	1	Life before LCA of Cellular_organisms - Cellular organisms	7	Amniota
ENSG00000009830	0	Euteleostomi	1	Life before LCA of Cellular_organisms - Cellular organisms	13	Opisthokonta
ENSG00000009844	0	Euteleostomi	2	Cellular organisms - Eukaryota	14	Eukaryota
ENSG00000009950	0	Euteleostomi	3	Eukaryota - Opisthokonta	7	Amniota
ENSG00000009954	0	Euteleostomi	1	Life before LCA of Cellular_organisms - Cellular organisms	11	Deuterostomia
ENSG00000010017	0	Euteleostomi	1	Life before LCA of Cellular_organisms - Cellular organisms	14	Eukaryota
ENSG00000010030	0	Euteleostomi	6	Metazoa - Eumetazoa	7	Amniota
ENSG00000010072	0	Euteleostomi	1	Life before LCA of Cellular_organisms - Cellular organisms	12	Bilateria
ENSG00000010165	0	Euteleostomi	1	Life before LCA of Cellular_organisms - Cellular organisms	12	Bilateria
ENSG00000010219	0	Euteleostomi	1	Life before LCA of Cellular_organisms - Cellular organisms	14	Eukaryota
ENSG00000010244	0	Euteleostomi	2	Cellular organisms - Eukaryota	12	Bilateria
ENSG00000010256	0	Euteleostomi	1	Life before LCA of Cellular_organisms - Cellular organisms	9	Euteleostomi
ENSG00000010270	1	Tetrapoda	6	Metazoa - Eumetazoa	8	Tetrapoda
ENSG00000010278	0	Euteleostomi	5	Holozoa - Metazoa	10	Chordata
ENSG00000010282	0	Euteleostomi	2	Cellular organisms - Eukaryota	9	Euteleostomi
ENSG00000010292	0	Euteleostomi	2	Cellular organisms - Eukaryota	14	Eukaryota
ENSG00000010295	0	Euteleostomi	10	Chordata - Olfactores	9	Euteleostomi
ENSG00000010310			6	Metazoa - Eumetazoa	5	Theria
ENSG00000010318	2	Amniota	2	Cellular organisms - Eukaryota	7	Amniota
ENSG00000010319	0	Euteleostomi	6	Metazoa - Eumetazoa	9	Euteleostomi
ENSG00000010322	0	Euteleostomi	1	Life before LCA of Cellular_organisms - Cellular organisms	12	Bilateria
ENSG00000010327	0	Euteleostomi	1	Life before LCA of Cellular_organisms - Cellular organisms	9	Euteleostomi
ENSG00000010361	3	Mammalia	4	Opisthokonta - Holozoa	6	Mammalia
ENSG00000010379	0	Euteleostomi	1	Life before LCA of Cellular_organisms - Cellular organisms	12	Bilateria
ENSG00000010404	0	Euteleostomi	1	Life before LCA of Cellular_organisms - Cellular organisms	11	Deuterostomia
ENSG00000010438	11	Hominidae	1	Life before LCA of Cellular_organisms - Cellular organisms	10	Chordata
ENSG00000010539	3	Mammalia	2	Cellular organisms - Eukaryota	5	Theria
ENSG00000010610	2	Amniota	12	Craniata - Euteleostomi	7	Amniota
ENSG00000010626	0	Euteleostomi	1	Life before LCA of Cellular_organisms - Cellular organisms	11	Deuterostomia
ENSG00000010671	0	Euteleostomi	1	Life before LCA of Cellular_organisms - Cellular organisms	10	Chordata
ENSG00000010704	4	Theria	11	Olfactores - Craniata	5	Theria
ENSG00000010803	0	Euteleostomi	4	Opisthokonta - Holozoa	11	Deuterostomia
ENSG00000010810	0	Euteleostomi	1	Life before LCA of Cellular_organisms - Cellular organisms	11	Deuterostomia
ENSG00000010818	0	Euteleostomi	2	Cellular organisms - Eukaryota	9	Euteleostomi
ENSG00000010932	1	Tetrapoda	1	Life before LCA of Cellular_organisms - Cellular organisms	14	Eukaryota
ENSG00000011007	0	Euteleostomi	1	Life before LCA of Cellular_organisms - Cellular organisms	11	Deuterostomia
ENSG00000011009	0	Euteleostomi	1	Life before LCA of Cellular_organisms - Cellular organisms	14	Eukaryota
ENSG00000011021	0	Euteleostomi	1	Life before LCA of Cellular_organisms - Cellular organisms	11	Deuterostomia
ENSG00000011028	0	Euteleostomi	1	Life before LCA of Cellular_organisms - Cellular organisms	11	Deuterostomia
ENSG00000011052	0	Euteleostomi	1	Life before LCA of Cellular_organisms - Cellular organisms	15	Cellular_Organisms
ENSG00000011083	1	Tetrapoda	1	Life before LCA of Cellular_organisms - Cellular organisms	8	Tetrapoda
ENSG00000011105	0	Euteleostomi	5	Holozoa - Metazoa	11	Deuterostomia
ENSG00000011114	0	Euteleostomi	2	Cellular organisms - Eukaryota	12	Bilateria
ENSG00000011132	1	Tetrapoda	4	Opisthokonta - Holozoa	5	Theria
ENSG00000011143	0	Euteleostomi	2	Cellular organisms - Eukaryota	11	Deuterostomia
ENSG00000011198	0	Euteleostomi	1	Life before LCA of Cellular_organisms - Cellular organisms	8	Tetrapoda
ENSG00000011201	0	Euteleostomi	6	Metazoa - Eumetazoa	12	Bilateria
ENSG00000011243	0	Euteleostomi	11	Olfactores - Craniata	9	Euteleostomi
ENSG00000011258	0	Euteleostomi	4	Opisthokonta - Holozoa	12	Bilateria
ENSG00000011260	1	Tetrapoda	1	Life before LCA of Cellular_organisms - Cellular organisms	14	Eukaryota
ENSG00000011275	0	Euteleostomi	1	Life before LCA of Cellular_organisms - Cellular organisms	8	Tetrapoda
ENSG00000011295	1	Tetrapoda	1	Life before LCA of Cellular_organisms - Cellular organisms	12	Bilateria
ENSG00000011304	0	Euteleostomi	2	Cellular organisms - Eukaryota	12	Bilateria
ENSG00000011332	0	Euteleostomi	2	Cellular organisms - Eukaryota	4	Eutheria
ENSG00000011347	0	Euteleostomi	2	Cellular organisms - Eukaryota	11	Deuterostomia
ENSG00000011376	0	Euteleostomi	1	Life before LCA of Cellular_organisms - Cellular organisms	15	Cellular_Organisms
ENSG00000011405	0	Euteleostomi	2	Cellular organisms - Eukaryota	12	Bilateria
ENSG00000011422			12	Craniata - Euteleostomi	4	Eutheria
ENSG00000011426	0	Euteleostomi	1	Life before LCA of Cellular_organisms - Cellular organisms	11	Deuterostomia
ENSG00000011451	0	Euteleostomi	7	Eumetazoa - Bilateria	9	Euteleostomi
ENSG00000011454	0	Euteleostomi	1	Life before LCA of Cellular_organisms - Cellular organisms	12	Bilateria
ENSG00000011465	0	Euteleostomi	1	Life before LCA of Cellular_organisms - Cellular organisms	9	Euteleostomi
ENSG00000011478	0	Euteleostomi	2	Cellular organisms - Eukaryota	12	Bilateria
ENSG00000011485	0	Euteleostomi	1	Life before LCA of Cellular_organisms - Cellular organisms	14	Eukaryota
ENSG00000011523	0	Euteleostomi	12	Craniata - Euteleostomi	6	Mammalia
ENSG00000011566	1	Tetrapoda	1	Life before LCA of Cellular_organisms - Cellular organisms	12	Bilateria
ENSG00000011590	4	Theria	2	Cellular organisms - Eukaryota	4	Eutheria
ENSG00000011600	3	Mammalia	12	Craniata - Euteleostomi	6	Mammalia
ENSG00000011638			11	Olfactores - Craniata	8	Tetrapoda
ENSG00000011677	2	Amniota	1	Life before LCA of Cellular_organisms - Cellular organisms	9	Euteleostomi
ENSG00000012048	2	Amniota	1	Life before LCA of Cellular_organisms - Cellular organisms	8	Tetrapoda
ENSG00000012061	0	Euteleostomi	2	Cellular organisms - Eukaryota	14	Eukaryota
ENSG00000012124	3	Mammalia	1	Life before LCA of Cellular_organisms - Cellular organisms	5	Theria
ENSG00000012174	0	Euteleostomi	1	Life before LCA of Cellular_organisms - Cellular organisms	12	Bilateria
ENSG00000012211	0	Euteleostomi	2	Cellular organisms - Eukaryota	4	Eutheria
ENSG00000012223			2	Cellular organisms - Eukaryota	9	Euteleostomi
ENSG00000012232	0	Euteleostomi	2	Cellular organisms - Eukaryota	12	Bilateria
ENSG00000012504	0	Euteleostomi	5	Holozoa - Metazoa	7	Amniota
ENSG00000012660	0	Euteleostomi	2	Cellular organisms - Eukaryota	0	HUMAN
ENSG00000012779	0	Euteleostomi	1	Life before LCA of Cellular_organisms - Cellular organisms	11	Deuterostomia
ENSG00000012817			2	Cellular organisms - Eukaryota	13	Opisthokonta
ENSG00000012822	0	Euteleostomi	1	Life before LCA of Cellular_organisms - Cellular organisms	4	Eutheria
ENSG00000012963	0	Euteleostomi	2	Cellular organisms - Eukaryota	13	Opisthokonta
ENSG00000012983	0	Euteleostomi	1	Life before LCA of Cellular_organisms - Cellular organisms	12	Bilateria
ENSG00000013016	0	Euteleostomi	1	Life before LCA of Cellular_organisms - Cellular organisms	14	Eukaryota
ENSG00000013275	0	Euteleostomi	1	Life before LCA of Cellular_organisms - Cellular organisms	14	Eukaryota
ENSG00000013288	0	Euteleostomi	1	Life before LCA of Cellular_organisms - Cellular organisms	8	Tetrapoda
ENSG00000013293	0	Euteleostomi	1	Life before LCA of Cellular_organisms - Cellular organisms	9	Euteleostomi
ENSG00000013297	0	Euteleostomi	11	Olfactores - Craniata	9	Euteleostomi
ENSG00000013306	0	Euteleostomi	2	Cellular organisms - Eukaryota	14	Eukaryota
ENSG00000013364	0	Euteleostomi	1	Life before LCA of Cellular_organisms - Cellular organisms	11	Deuterostomia
ENSG00000013374	1	Tetrapoda	2	Cellular organisms - Eukaryota	11	Deuterostomia
ENSG00000013375	0	Euteleostomi	1	Life before LCA of Cellular_organisms - Cellular organisms	14	Eukaryota
ENSG00000013392	1	Tetrapoda	2	Cellular organisms - Eukaryota	8	Tetrapoda
ENSG00000013441	2	Amniota	1	Life before LCA of Cellular_organisms - Cellular organisms	14	Eukaryota
ENSG00000013503	0	Euteleostomi	1	Life before LCA of Cellular_organisms - Cellular organisms	15	Cellular_Organisms
ENSG00000013523	0	Euteleostomi	2	Cellular organisms - Eukaryota	7	Amniota
ENSG00000013561	0	Euteleostomi	2	Cellular organisms - Eukaryota	13	Opisthokonta
ENSG00000013563	0	Euteleostomi	1	Life before LCA of Cellular_organisms - Cellular organisms	5	Theria
ENSG00000013573	11	Hominidae	1	Life before LCA of Cellular_organisms - Cellular organisms	13	Opisthokonta
ENSG00000013583	1	Tetrapoda	1	Life before LCA of Cellular_organisms - Cellular organisms	8	Tetrapoda
ENSG00000013588	2	Amniota	7	Eumetazoa - Bilateria	8	Tetrapoda
ENSG00000013619	1	Tetrapoda	2	Cellular organisms - Eukaryota	6	Mammalia
ENSG00000013725	2	Amniota	2	Cellular organisms - Eukaryota	6	Mammalia
ENSG00000013810	0	Euteleostomi	1	Life before LCA of Cellular_organisms - Cellular organisms	0	HUMAN
ENSG00000014123	0	Euteleostomi	2	Cellular organisms - Eukaryota	14	Eukaryota
ENSG00000014138	0	Euteleostomi	2	Cellular organisms - Eukaryota	13	Opisthokonta
ENSG00000014164	0	Euteleostomi	2	Cellular organisms - Eukaryota	8	Tetrapoda
ENSG00000014216	0	Euteleostomi	1	Life before LCA of Cellular_organisms - Cellular organisms	12	Bilateria
ENSG00000014257	1	Tetrapoda	1	Life before LCA of Cellular_organisms - Cellular organisms	12	Bilateria
ENSG00000014641	0	Euteleostomi	1	Life before LCA of Cellular_organisms - Cellular organisms	14	Eukaryota
ENSG00000014824	0	Euteleostomi	1	Life before LCA of Cellular_organisms - Cellular organisms	12	Bilateria
ENSG00000014914	0	Euteleostomi	2	Cellular organisms - Eukaryota	5	Theria
ENSG00000014919	0	Euteleostomi	1	Life before LCA of Cellular_organisms - Cellular organisms	14	Eukaryota
ENSG00000015133	0	Euteleostomi	1	Life before LCA of Cellular_organisms - Cellular organisms	12	Bilateria
ENSG00000015153	0	Euteleostomi	6	Metazoa - Eumetazoa	9	Euteleostomi
ENSG00000015171	0	Euteleostomi	2	Cellular organisms - Eukaryota	10	Chordata
ENSG00000015285	0	Euteleostomi	2	Cellular organisms - Eukaryota	9	Euteleostomi
ENSG00000015413	0	Euteleostomi	1	Life before LCA of Cellular_organisms - Cellular organisms	13	Opisthokonta
ENSG00000015475	2	Amniota	13	Euteleostomi - Tetrapoda	8	Tetrapoda
ENSG00000015479	1	Tetrapoda	2	Cellular organisms - Eukaryota	9	Euteleostomi
ENSG00000015520	0	Euteleostomi	2	Cellular organisms - Eukaryota	14	Eukaryota
ENSG00000015532	0	Euteleostomi	1	Life before LCA of Cellular_organisms - Cellular organisms	12	Bilateria
ENSG00000015568			2	Cellular organisms - Eukaryota	10	Chordata
ENSG00000015592	0	Euteleostomi	1	Life before LCA of Cellular_organisms - Cellular organisms	9	Euteleostomi
ENSG00000015676	0	Euteleostomi	2	Cellular organisms - Eukaryota	11	Deuterostomia
ENSG00000016082	0	Euteleostomi	2	Cellular organisms - Eukaryota	11	Deuterostomia
ENSG00000016391	0	Euteleostomi	1	Life before LCA of Cellular_organisms - Cellular organisms	14	Eukaryota
ENSG00000016402	3	Mammalia	9	Deuterostomia - Chordata	10	Chordata
ENSG00000016490	1	Tetrapoda	1	Life before LCA of Cellular_organisms - Cellular organisms	11	Deuterostomia
ENSG00000016602	1	Tetrapoda	1	Life before LCA of Cellular_organisms - Cellular organisms	11	Deuterostomia
ENSG00000016864	0	Euteleostomi	1	Life before LCA of Cellular_organisms - Cellular organisms	7	Amniota
ENSG00000017260	0	Euteleostomi	1	Life before LCA of Cellular_organisms - Cellular organisms	14	Eukaryota
ENSG00000017373	0	Euteleostomi	6	Metazoa - Eumetazoa	9	Euteleostomi
ENSG00000017427	0	Euteleostomi	2	Cellular organisms - Eukaryota	10	Chordata
ENSG00000017483	0	Euteleostomi	2	Cellular organisms - Eukaryota	0	HUMAN
ENSG00000017621	3	Mammalia	4	Opisthokonta - Holozoa	3	Euarchontoglires
ENSG00000017797	0	Euteleostomi	2	Cellular organisms - Eukaryota	11	Deuterostomia
ENSG00000018189	0	Euteleostomi	1	Life before LCA of Cellular_organisms - Cellular organisms	11	Deuterostomia
ENSG00000018236	1	Tetrapoda	1	Life before LCA of Cellular_organisms - Cellular organisms	12	Bilateria
ENSG00000018280	0	Euteleostomi	1	Life before LCA of Cellular_organisms - Cellular organisms	15	Cellular_Organisms
ENSG00000018408	1	Tetrapoda	2	Cellular organisms - Eukaryota	5	Theria
ENSG00000018510	0	Euteleostomi	1	Life before LCA of Cellular_organisms - Cellular organisms	12	Bilateria
ENSG00000018610	1	Tetrapoda	2	Cellular organisms - Eukaryota	12	Bilateria
ENSG00000018625	0	Euteleostomi	1	Life before LCA of Cellular_organisms - Cellular organisms	14	Eukaryota
ENSG00000018699	0	Euteleostomi	1	Life before LCA of Cellular_organisms - Cellular organisms	14	Eukaryota
ENSG00000018869	4	Theria	1	Life before LCA of Cellular_organisms - Cellular organisms	2	Catarrhini
ENSG00000019102	4	Theria	6	Metazoa - Eumetazoa	5	Theria
ENSG00000019144	0	Euteleostomi	1	Life before LCA of Cellular_organisms - Cellular organisms	9	Euteleostomi
ENSG00000019169	4	Theria	1	Life before LCA of Cellular_organisms - Cellular organisms	5	Theria
ENSG00000019186	0	Euteleostomi	1	Life before LCA of Cellular_organisms - Cellular organisms	12	Bilateria
ENSG00000019485	0	Euteleostomi	6	Metazoa - Eumetazoa	7	Amniota
ENSG00000019505	1	Tetrapoda	6	Metazoa - Eumetazoa	8	Tetrapoda
ENSG00000019549	0	Euteleostomi	2	Cellular organisms - Eukaryota	12	Bilateria
ENSG00000019582	0	Euteleostomi	6	Metazoa - Eumetazoa	9	Euteleostomi
ENSG00000019991	1	Tetrapoda	1	Life before LCA of Cellular_organisms - Cellular organisms	9	Euteleostomi
ENSG00000019995	0	Euteleostomi	2	Cellular organisms - Eukaryota	11	Deuterostomia
ENSG00000020129	0	Euteleostomi	5	Holozoa - Metazoa	11	Deuterostomia
ENSG00000020181	0	Euteleostomi	1	Life before LCA of Cellular_organisms - Cellular organisms	8	Tetrapoda
ENSG00000020256	0	Euteleostomi	2	Cellular organisms - Eukaryota	9	Euteleostomi
ENSG00000020426	0	Euteleostomi	2	Cellular organisms - Eukaryota	13	Opisthokonta
ENSG00000020577	0	Euteleostomi	3	Eukaryota - Opisthokonta	10	Chordata
ENSG00000020633	0	Euteleostomi	5	Holozoa - Metazoa	3	Euarchontoglires
ENSG00000020922	0	Euteleostomi	1	Life before LCA of Cellular_organisms - Cellular organisms	14	Eukaryota
ENSG00000021300	2	Amniota	6	Metazoa - Eumetazoa	5	Theria
ENSG00000021355	0	Euteleostomi	1	Life before LCA of Cellular_organisms - Cellular organisms	12	Bilateria
ENSG00000021461			1	Life before LCA of Cellular_organisms - Cellular organisms	12	Bilateria
ENSG00000021488	0	Euteleostomi	1	Life before LCA of Cellular_organisms - Cellular organisms	11	Deuterostomia
ENSG00000021574	0	Euteleostomi	1	Life before LCA of Cellular_organisms - Cellular organisms	12	Bilateria
ENSG00000021645	1	Tetrapoda	4	Opisthokonta - Holozoa	12	Bilateria
ENSG00000021762	0	Euteleostomi	2	Cellular organisms - Eukaryota	13	Opisthokonta
ENSG00000021776	0	Euteleostomi	1	Life before LCA of Cellular_organisms - Cellular organisms	14	Eukaryota
ENSG00000021826	0	Euteleostomi	1	Life before LCA of Cellular_organisms - Cellular organisms	15	Cellular_Organisms
ENSG00000021852	0	Euteleostomi	6	Metazoa - Eumetazoa	8	Tetrapoda
ENSG00000022267	0	Euteleostomi	2	Cellular organisms - Eukaryota	9	Euteleostomi
ENSG00000022277	0	Euteleostomi	2	Cellular organisms - Eukaryota	14	Eukaryota
ENSG00000022355	0	Euteleostomi	1	Life before LCA of Cellular_organisms - Cellular organisms	9	Euteleostomi
ENSG00000022556	5	Eutheria	1	Life before LCA of Cellular_organisms - Cellular organisms	3	Euarchontoglires
ENSG00000022567	0	Euteleostomi	1	Life before LCA of Cellular_organisms - Cellular organisms	9	Euteleostomi
ENSG00000022840	0	Euteleostomi	2	Cellular organisms - Eukaryota	13	Opisthokonta
ENSG00000022976	0	Euteleostomi	9	Deuterostomia - Chordata	7	Amniota
ENSG00000023041	0	Euteleostomi	2	Cellular organisms - Eukaryota	12	Bilateria
ENSG00000023171	0	Euteleostomi	2	Cellular organisms - Eukaryota	12	Bilateria
ENSG00000023191	2	Amniota	1	Life before LCA of Cellular_organisms - Cellular organisms	5	Theria
ENSG00000023228	0	Euteleostomi	1	Life before LCA of Cellular_organisms - Cellular organisms	15	Cellular_Organisms
ENSG00000023287	0	Euteleostomi	1	Life before LCA of Cellular_organisms - Cellular organisms	11	Deuterostomia
ENSG00000023318	0	Euteleostomi	1	Life before LCA of Cellular_organisms - Cellular organisms	12	Bilateria
ENSG00000023330	0	Euteleostomi	1	Life before LCA of Cellular_organisms - Cellular organisms	15	Cellular_Organisms
ENSG00000023445	0	Euteleostomi	2	Cellular organisms - Eukaryota	11	Deuterostomia
ENSG00000023516	0	Euteleostomi	8	Bilateria - Deuterostomia	8	Tetrapoda
ENSG00000023572	0	Euteleostomi	1	Life before LCA of Cellular_organisms - Cellular organisms	14	Eukaryota
ENSG00000023608	1	Tetrapoda	2	Cellular organisms - Eukaryota	10	Chordata
ENSG00000023697	0	Euteleostomi	1	Life before LCA of Cellular_organisms - Cellular organisms	15	Cellular_Organisms
ENSG00000023734	0	Euteleostomi	1	Life before LCA of Cellular_organisms - Cellular organisms	14	Eukaryota
ENSG00000023839	0	Euteleostomi	1	Life before LCA of Cellular_organisms - Cellular organisms	14	Eukaryota
ENSG00000023892	0	Euteleostomi	2	Cellular organisms - Eukaryota	9	Euteleostomi
ENSG00000023902	0	Euteleostomi	9	Deuterostomia - Chordata	9	Euteleostomi
ENSG00000023909	0	Euteleostomi	1	Life before LCA of Cellular_organisms - Cellular organisms	13	Opisthokonta
ENSG00000024048	0	Euteleostomi	1	Life before LCA of Cellular_organisms - Cellular organisms	13	Opisthokonta
ENSG00000024422	5	Eutheria	1	Life before LCA of Cellular_organisms - Cellular organisms	14	Eukaryota
ENSG00000024526	0	Euteleostomi	6	Metazoa - Eumetazoa	8	Tetrapoda
ENSG00000024862	0	Euteleostomi	6	Metazoa - Eumetazoa	7	Amniota
ENSG00000025039	0	Euteleostomi	2	Cellular organisms - Eukaryota	14	Eukaryota
ENSG00000025156	0	Euteleostomi	2	Cellular organisms - Eukaryota	8	Tetrapoda
ENSG00000025293	0	Euteleostomi	1	Life before LCA of Cellular_organisms - Cellular organisms	9	Euteleostomi
ENSG00000025423	4	Theria	1	Life before LCA of Cellular_organisms - Cellular organisms	12	Bilateria
ENSG00000025434	0	Euteleostomi	5	Holozoa - Metazoa	11	Deuterostomia
ENSG00000025708	0	Euteleostomi	1	Life before LCA of Cellular_organisms - Cellular organisms	3	Euarchontoglires
ENSG00000025770	0	Euteleostomi	2	Cellular organisms - Eukaryota	11	Deuterostomia
ENSG00000025772	0	Euteleostomi	1	Life before LCA of Cellular_organisms - Cellular organisms	0	HUMAN
ENSG00000025796	0	Euteleostomi	1	Life before LCA of Cellular_organisms - Cellular organisms	14	Eukaryota
ENSG00000025800	0	Euteleostomi	2	Cellular organisms - Eukaryota	14	Eukaryota
ENSG00000026025	0	Euteleostomi	1	Life before LCA of Cellular_organisms - Cellular organisms	10	Chordata
ENSG00000026036	0	Euteleostomi	1	Life before LCA of Cellular_organisms - Cellular organisms	14	Eukaryota
ENSG00000026103	3	Mammalia	2	Cellular organisms - Eukaryota	7	Amniota
ENSG00000026297	1	Tetrapoda	1	Life before LCA of Cellular_organisms - Cellular organisms	14	Eukaryota
ENSG00000026508	1	Tetrapoda	6	Metazoa - Eumetazoa	8	Tetrapoda
ENSG00000026559	0	Euteleostomi	1	Life before LCA of Cellular_organisms - Cellular organisms	9	Euteleostomi
ENSG00000026652	0	Euteleostomi	1	Life before LCA of Cellular_organisms - Cellular organisms	11	Deuterostomia
ENSG00000026751	3	Mammalia	15	Amniota - Mammalia	4	Eutheria
ENSG00000026950	8	Simiiformes	7	Eumetazoa - Bilateria	2	Catarrhini
ENSG00000027001	1	Tetrapoda	1	Life before LCA of Cellular_organisms - Cellular organisms	14	Eukaryota
ENSG00000027075	0	Euteleostomi	1	Life before LCA of Cellular_organisms - Cellular organisms	13	Opisthokonta
ENSG00000027644	1	Tetrapoda	1	Life before LCA of Cellular_organisms - Cellular organisms	12	Bilateria
ENSG00000027697	3	Mammalia	12	Craniata - Euteleostomi	7	Amniota
ENSG00000027847	0	Euteleostomi	1	Life before LCA of Cellular_organisms - Cellular organisms	12	Bilateria
ENSG00000027869	1	Tetrapoda	4	Opisthokonta - Holozoa	5	Theria
ENSG00000028116	1	Tetrapoda	1	Life before LCA of Cellular_organisms - Cellular organisms	9	Euteleostomi
ENSG00000028137	3	Mammalia	2	Cellular organisms - Eukaryota	7	Amniota
ENSG00000028203	0	Euteleostomi	2	Cellular organisms - Eukaryota	10	Chordata
ENSG00000028277	0	Euteleostomi	5	Holozoa - Metazoa	4	Eutheria
ENSG00000028310	0	Euteleostomi	2	Cellular organisms - Eukaryota	9	Euteleostomi
ENSG00000028528	0	Euteleostomi	2	Cellular organisms - Eukaryota	9	Euteleostomi
ENSG00000028839	0	Euteleostomi	1	Life before LCA of Cellular_organisms - Cellular organisms	11	Deuterostomia
ENSG00000029153	0	Euteleostomi	1	Life before LCA of Cellular_organisms - Cellular organisms	9	Euteleostomi
ENSG00000029363	1	Tetrapoda	2	Cellular organisms - Eukaryota	7	Amniota
ENSG00000029364	0	Euteleostomi	1	Life before LCA of Cellular_organisms - Cellular organisms	12	Bilateria
ENSG00000029534	0	Euteleostomi	1	Life before LCA of Cellular_organisms - Cellular organisms	14	Eukaryota
ENSG00000029559	2	Amniota	14	Tetrapoda - Amniota	6	Mammalia
ENSG00000029639	0	Euteleostomi	1	Life before LCA of Cellular_organisms - Cellular organisms	12	Bilateria
ENSG00000029725	0	Euteleostomi	1	Life before LCA of Cellular_organisms - Cellular organisms	12	Bilateria
ENSG00000029993	1	Tetrapoda	2	Cellular organisms - Eukaryota	9	Euteleostomi
ENSG00000030066	0	Euteleostomi	2	Cellular organisms - Eukaryota	9	Euteleostomi
ENSG00000030110	1	Tetrapoda	1	Life before LCA of Cellular_organisms - Cellular organisms	8	Tetrapoda
ENSG00000030304	0	Euteleostomi	1	Life before LCA of Cellular_organisms - Cellular organisms	11	Deuterostomia
ENSG00000030419	1	Tetrapoda	2	Cellular organisms - Eukaryota	9	Euteleostomi
ENSG00000030582	0	Euteleostomi	1	Life before LCA of Cellular_organisms - Cellular organisms	11	Deuterostomia
ENSG00000031003	0	Euteleostomi	2	Cellular organisms - Eukaryota	6	Mammalia
ENSG00000031081	0	Euteleostomi	2	Cellular organisms - Eukaryota	5	Theria
ENSG00000031691	3	Mammalia	2	Cellular organisms - Eukaryota	7	Amniota
ENSG00000031698	0	Euteleostomi	1	Life before LCA of Cellular_organisms - Cellular organisms	15	Cellular_Organisms
ENSG00000031823	0	Euteleostomi	2	Cellular organisms - Eukaryota	12	Bilateria
ENSG00000032219	0	Euteleostomi	2	Cellular organisms - Eukaryota	9	Euteleostomi
ENSG00000032389	0	Euteleostomi	1	Life before LCA of Cellular_organisms - Cellular organisms	14	Eukaryota
ENSG00000032444	0	Euteleostomi	1	Life before LCA of Cellular_organisms - Cellular organisms	13	Opisthokonta
ENSG00000032742	0	Euteleostomi	1	Life before LCA of Cellular_organisms - Cellular organisms	12	Bilateria
ENSG00000033011	0	Euteleostomi	1	Life before LCA of Cellular_organisms - Cellular organisms	0	HUMAN
ENSG00000033030	0	Euteleostomi	2	Cellular organisms - Eukaryota	11	Deuterostomia
ENSG00000033050	0	Euteleostomi	1	Life before LCA of Cellular_organisms - Cellular organisms	14	Eukaryota
ENSG00000033100	0	Euteleostomi	4	Opisthokonta - Holozoa	12	Bilateria
ENSG00000033122	0	Euteleostomi	1	Life before LCA of Cellular_organisms - Cellular organisms	10	Chordata
ENSG00000033170	0	Euteleostomi	4	Opisthokonta - Holozoa	12	Bilateria
ENSG00000033178	0	Euteleostomi	1	Life before LCA of Cellular_organisms - Cellular organisms	14	Eukaryota
ENSG00000033327	0	Euteleostomi	2	Cellular organisms - Eukaryota	8	Tetrapoda
ENSG00000033627	0	Euteleostomi	1	Life before LCA of Cellular_organisms - Cellular organisms	14	Eukaryota
ENSG00000033800	0	Euteleostomi	2	Cellular organisms - Eukaryota	11	Deuterostomia
ENSG00000033867	0	Euteleostomi	1	Life before LCA of Cellular_organisms - Cellular organisms	12	Bilateria
ENSG00000034053	0	Euteleostomi	4	Opisthokonta - Holozoa	12	Bilateria
ENSG00000034152	0	Euteleostomi	1	Life before LCA of Cellular_organisms - Cellular organisms	13	Opisthokonta
ENSG00000034239	4	Theria	2	Cellular organisms - Eukaryota	11	Deuterostomia
ENSG00000034510	3	Mammalia	5	Holozoa - Metazoa	5	Theria
ENSG00000034533	0	Euteleostomi	3	Eukaryota - Opisthokonta	11	Deuterostomia
ENSG00000034677	0	Euteleostomi	2	Cellular organisms - Eukaryota	12	Bilateria
ENSG00000034693	0	Euteleostomi	2	Cellular organisms - Eukaryota	13	Opisthokonta
ENSG00000034713	0	Euteleostomi	2	Cellular organisms - Eukaryota	14	Eukaryota
ENSG00000034971	0	Euteleostomi	1	Life before LCA of Cellular_organisms - Cellular organisms	9	Euteleostomi
ENSG00000035115	0	Euteleostomi	1	Life before LCA of Cellular_organisms - Cellular organisms	8	Tetrapoda
ENSG00000035141	0	Euteleostomi	2	Cellular organisms - Eukaryota	12	Bilateria
ENSG00000035403	0	Euteleostomi	1	Life before LCA of Cellular_organisms - Cellular organisms	12	Bilateria
ENSG00000035499	1	Tetrapoda	2	Cellular organisms - Eukaryota	10	Chordata
ENSG00000035664	0	Euteleostomi	1	Life before LCA of Cellular_organisms - Cellular organisms	2	Catarrhini
ENSG00000035681	0	Euteleostomi	1	Life before LCA of Cellular_organisms - Cellular organisms	9	Euteleostomi
ENSG00000035687	1	Tetrapoda	1	Life before LCA of Cellular_organisms - Cellular organisms	15	Cellular_Organisms
ENSG00000035720	3	Mammalia	8	Bilateria - Deuterostomia	9	Euteleostomi
ENSG00000035862	0	Euteleostomi	6	Metazoa - Eumetazoa	9	Euteleostomi
ENSG00000035928	0	Euteleostomi	1	Life before LCA of Cellular_organisms - Cellular organisms	15	Cellular_Organisms
ENSG00000036054	0	Euteleostomi	2	Cellular organisms - Eukaryota	12	Bilateria
ENSG00000036257	0	Euteleostomi	2	Cellular organisms - Eukaryota	14	Eukaryota
ENSG00000036448	0	Euteleostomi	1	Life before LCA of Cellular_organisms - Cellular organisms	10	Chordata
ENSG00000036473	0	Euteleostomi	1	Life before LCA of Cellular_organisms - Cellular organisms	9	Euteleostomi
ENSG00000036530	3	Mammalia	1	Life before LCA of Cellular_organisms - Cellular organisms	9	Euteleostomi
ENSG00000036549	0	Euteleostomi	1	Life before LCA of Cellular_organisms - Cellular organisms	11	Deuterostomia
ENSG00000036565	1	Tetrapoda	1	Life before LCA of Cellular_organisms - Cellular organisms	12	Bilateria
ENSG00000036672	0	Euteleostomi	2	Cellular organisms - Eukaryota	10	Chordata
ENSG00000036828	0	Euteleostomi	1	Life before LCA of Cellular_organisms - Cellular organisms	11	Deuterostomia
ENSG00000037042	2	Amniota	1	Life before LCA of Cellular_organisms - Cellular organisms	14	Eukaryota
ENSG00000037241	1	Tetrapoda	1	Life before LCA of Cellular_organisms - Cellular organisms	15	Cellular_Organisms
ENSG00000037280	0	Euteleostomi	1	Life before LCA of Cellular_organisms - Cellular organisms	11	Deuterostomia
ENSG00000037474	0	Euteleostomi	1	Life before LCA of Cellular_organisms - Cellular organisms	14	Eukaryota
ENSG00000037637	0	Euteleostomi	1	Life before LCA of Cellular_organisms - Cellular organisms	8	Tetrapoda
ENSG00000037749	0	Euteleostomi	11	Olfactores - Craniata	8	Tetrapoda
ENSG00000037757	0	Euteleostomi	1	Life before LCA of Cellular_organisms - Cellular organisms	15	Cellular_Organisms
ENSG00000037897	0	Euteleostomi	1	Life before LCA of Cellular_organisms - Cellular organisms	15	Cellular_Organisms
ENSG00000037965	0	Euteleostomi	2	Cellular organisms - Eukaryota	9	Euteleostomi
ENSG00000038002	0	Euteleostomi	1	Life before LCA of Cellular_organisms - Cellular organisms	12	Bilateria
ENSG00000038210	0	Euteleostomi	2	Cellular organisms - Eukaryota	13	Opisthokonta
ENSG00000038219	0	Euteleostomi	1	Life before LCA of Cellular_organisms - Cellular organisms	8	Tetrapoda
ENSG00000038274	1	Tetrapoda	1	Life before LCA of Cellular_organisms - Cellular organisms	9	Euteleostomi
ENSG00000038295	0	Euteleostomi	1	Life before LCA of Cellular_organisms - Cellular organisms	12	Bilateria
ENSG00000038358	0	Euteleostomi	2	Cellular organisms - Eukaryota	11	Deuterostomia
ENSG00000038382	0	Euteleostomi	1	Life before LCA of Cellular_organisms - Cellular organisms	12	Bilateria
ENSG00000038427	0	Euteleostomi	1	Life before LCA of Cellular_organisms - Cellular organisms	9	Euteleostomi
ENSG00000038532	0	Euteleostomi	2	Cellular organisms - Eukaryota	14	Eukaryota
ENSG00000038945			1	Life before LCA of Cellular_organisms - Cellular organisms	6	Mammalia
ENSG00000039068	0	Euteleostomi	1	Life before LCA of Cellular_organisms - Cellular organisms	10	Chordata
ENSG00000039123	0	Euteleostomi	1	Life before LCA of Cellular_organisms - Cellular organisms	14	Eukaryota
ENSG00000039139	0	Euteleostomi	2	Cellular organisms - Eukaryota	14	Eukaryota
ENSG00000039319	0	Euteleostomi	1	Life before LCA of Cellular_organisms - Cellular organisms	12	Bilateria
ENSG00000039523	0	Euteleostomi	1	Life before LCA of Cellular_organisms - Cellular organisms	10	Chordata
ENSG00000039537	0	Euteleostomi	2	Cellular organisms - Eukaryota	10	Chordata
ENSG00000039560	0	Euteleostomi	1	Life before LCA of Cellular_organisms - Cellular organisms	9	Euteleostomi
ENSG00000039600	1	Tetrapoda	2	Cellular organisms - Eukaryota	8	Tetrapoda
ENSG00000039650	0	Euteleostomi	1	Life before LCA of Cellular_organisms - Cellular organisms	5	Theria
ENSG00000039987	0	Euteleostomi	7	Eumetazoa - Bilateria	5	Theria
ENSG00000040199	0	Euteleostomi	1	Life before LCA of Cellular_organisms - Cellular organisms	8	Tetrapoda
ENSG00000040275	0	Euteleostomi	1	Life before LCA of Cellular_organisms - Cellular organisms	11	Deuterostomia
ENSG00000040341	0	Euteleostomi	1	Life before LCA of Cellular_organisms - Cellular organisms	9	Euteleostomi
ENSG00000040487	0	Euteleostomi	2	Cellular organisms - Eukaryota	13	Opisthokonta
ENSG00000040531	0	Euteleostomi	2	Cellular organisms - Eukaryota	12	Bilateria
ENSG00000040608	0	Euteleostomi	1	Life before LCA of Cellular_organisms - Cellular organisms	3	Euarchontoglires
ENSG00000040633	0	Euteleostomi	3	Eukaryota - Opisthokonta	5	Theria
ENSG00000040731	1	Tetrapoda	1	Life before LCA of Cellular_organisms - Cellular organisms	10	Chordata
ENSG00000040933	0	Euteleostomi	4	Opisthokonta - Holozoa	12	Bilateria
ENSG00000041353	0	Euteleostomi	1	Life before LCA of Cellular_organisms - Cellular organisms	6	Mammalia
ENSG00000041357	0	Euteleostomi	1	Life before LCA of Cellular_organisms - Cellular organisms	14	Eukaryota
ENSG00000041515	0	Euteleostomi	1	Life before LCA of Cellular_organisms - Cellular organisms	8	Tetrapoda
ENSG00000041802	0	Euteleostomi	1	Life before LCA of Cellular_organisms - Cellular organisms	14	Eukaryota
ENSG00000041880	0	Euteleostomi	1	Life before LCA of Cellular_organisms - Cellular organisms	5	Theria
ENSG00000041982	0	Euteleostomi	1	Life before LCA of Cellular_organisms - Cellular organisms	12	Bilateria
ENSG00000041988	0	Euteleostomi	6	Metazoa - Eumetazoa	5	Theria
ENSG00000042062	1	Tetrapoda	5	Holozoa - Metazoa	9	Euteleostomi
ENSG00000042088	0	Euteleostomi	2	Cellular organisms - Eukaryota	14	Eukaryota
ENSG00000042286	0	Euteleostomi	1	Life before LCA of Cellular_organisms - Cellular organisms	11	Deuterostomia
ENSG00000042304	5	Eutheria	12	Craniata - Euteleostomi	1	Homininae
ENSG00000042317	0	Euteleostomi	7	Eumetazoa - Bilateria	7	Amniota
ENSG00000042429	0	Euteleostomi	2	Cellular organisms - Eukaryota	12	Bilateria
ENSG00000042445	0	Euteleostomi	1	Life before LCA of Cellular_organisms - Cellular organisms	11	Deuterostomia
ENSG00000042493	0	Euteleostomi	2	Cellular organisms - Eukaryota	9	Euteleostomi
ENSG00000042753	0	Euteleostomi	2	Cellular organisms - Eukaryota	5	Theria
ENSG00000042781	0	Euteleostomi	1	Life before LCA of Cellular_organisms - Cellular organisms	11	Deuterostomia
ENSG00000042813	2	Amniota	11	Olfactores - Craniata	7	Amniota
ENSG00000042832	0	Euteleostomi	1	Life before LCA of Cellular_organisms - Cellular organisms	9	Euteleostomi
ENSG00000042980	1	Tetrapoda	1	Life before LCA of Cellular_organisms - Cellular organisms	7	Amniota
ENSG00000043039	0	Euteleostomi	2	Cellular organisms - Eukaryota	7	Amniota
ENSG00000043093	0	Euteleostomi	2	Cellular organisms - Eukaryota	14	Eukaryota
ENSG00000043143	0	Euteleostomi	2	Cellular organisms - Eukaryota	12	Bilateria
ENSG00000043355	0	Euteleostomi	2	Cellular organisms - Eukaryota	5	Theria
ENSG00000043462	1	Tetrapoda	1	Life before LCA of Cellular_organisms - Cellular organisms	7	Amniota
ENSG00000043514	0	Euteleostomi	1	Life before LCA of Cellular_organisms - Cellular organisms	15	Cellular_Organisms
ENSG00000043591	0	Euteleostomi	6	Metazoa - Eumetazoa	7	Amniota
ENSG00000044012	3	Mammalia	12	Craniata - Euteleostomi	5	Theria
ENSG00000044090	2	Amniota	2	Cellular organisms - Eukaryota	8	Tetrapoda
ENSG00000044115	0	Euteleostomi	4	Opisthokonta - Holozoa	12	Bilateria
ENSG00000044446	0	Euteleostomi	1	Life before LCA of Cellular_organisms - Cellular organisms	12	Bilateria
ENSG00000044459	0	Euteleostomi	1	Life before LCA of Cellular_organisms - Cellular organisms	11	Deuterostomia
ENSG00000044524	0	Euteleostomi	1	Life before LCA of Cellular_organisms - Cellular organisms	12	Bilateria
ENSG00000044574	0	Euteleostomi	1	Life before LCA of Cellular_organisms - Cellular organisms	14	Eukaryota
ENSG00000046604	0	Euteleostomi	1	Life before LCA of Cellular_organisms - Cellular organisms	5	Theria
ENSG00000046647	2	Amniota	6	Metazoa - Eumetazoa	9	Euteleostomi
ENSG00000046651	0	Euteleostomi	1	Life before LCA of Cellular_organisms - Cellular organisms	9	Euteleostomi
ENSG00000046653	0	Euteleostomi	7	Eumetazoa - Bilateria	10	Chordata
ENSG00000046774			6	Metazoa - Eumetazoa	2	Catarrhini
ENSG00000046889	0	Euteleostomi	1	Life before LCA of Cellular_organisms - Cellular organisms	10	Chordata
ENSG00000047056	0	Euteleostomi	1	Life before LCA of Cellular_organisms - Cellular organisms	12	Bilateria
ENSG00000047188	0	Euteleostomi	1	Life before LCA of Cellular_organisms - Cellular organisms	12	Bilateria
ENSG00000047230	2	Amniota	1	Life before LCA of Cellular_organisms - Cellular organisms	15	Cellular_Organisms
ENSG00000047249	0	Euteleostomi	2	Cellular organisms - Eukaryota	14	Eukaryota
ENSG00000047315	0	Euteleostomi	1	Life before LCA of Cellular_organisms - Cellular organisms	15	Cellular_Organisms
ENSG00000047346	0	Euteleostomi	2	Cellular organisms - Eukaryota	9	Euteleostomi
ENSG00000047365	1	Tetrapoda	2	Cellular organisms - Eukaryota	11	Deuterostomia
ENSG00000047410	0	Euteleostomi	1	Life before LCA of Cellular_organisms - Cellular organisms	13	Opisthokonta
ENSG00000047457	0	Euteleostomi	1	Life before LCA of Cellular_organisms - Cellular organisms	11	Deuterostomia
ENSG00000047578	0	Euteleostomi	2	Cellular organisms - Eukaryota	11	Deuterostomia
ENSG00000047579	0	Euteleostomi	3	Eukaryota - Opisthokonta	9	Euteleostomi
ENSG00000047597	0	Euteleostomi	6	Metazoa - Eumetazoa	9	Euteleostomi
ENSG00000047617	1	Tetrapoda	2	Cellular organisms - Eukaryota	11	Deuterostomia
ENSG00000047621	0	Euteleostomi	2	Cellular organisms - Eukaryota	12	Bilateria
ENSG00000047634	4	Theria	3	Eukaryota - Opisthokonta	2	Catarrhini
ENSG00000047644	0	Euteleostomi	6	Metazoa - Eumetazoa	11	Deuterostomia
ENSG00000047648	0	Euteleostomi	2	Cellular organisms - Eukaryota	9	Euteleostomi
ENSG00000047662	1	Tetrapoda	1	Life before LCA of Cellular_organisms - Cellular organisms	0	HUMAN
ENSG00000047849	0	Euteleostomi	1	Life before LCA of Cellular_organisms - Cellular organisms	5	Theria
ENSG00000047932	0	Euteleostomi	4	Opisthokonta - Holozoa	11	Deuterostomia
ENSG00000047936	1	Tetrapoda	1	Life before LCA of Cellular_organisms - Cellular organisms	3	Euarchontoglires
ENSG00000048028	0	Euteleostomi	2	Cellular organisms - Eukaryota	9	Euteleostomi
ENSG00000048052	0	Euteleostomi	1	Life before LCA of Cellular_organisms - Cellular organisms	12	Bilateria
ENSG00000048140	0	Euteleostomi	5	Holozoa - Metazoa	12	Bilateria
ENSG00000048162	0	Euteleostomi	6	Metazoa - Eumetazoa	12	Bilateria
ENSG00000048342	0	Euteleostomi	2	Cellular organisms - Eukaryota	12	Bilateria
ENSG00000048392	1	Tetrapoda	1	Life before LCA of Cellular_organisms - Cellular organisms	15	Cellular_Organisms
ENSG00000048405	0	Euteleostomi	2	Cellular organisms - Eukaryota	9	Euteleostomi
ENSG00000048462	3	Mammalia	15	Amniota - Mammalia	6	Mammalia
ENSG00000048471	0	Euteleostomi	2	Cellular organisms - Eukaryota	11	Deuterostomia
ENSG00000048540	0	Euteleostomi	2	Cellular organisms - Eukaryota	5	Theria
ENSG00000048544	0	Euteleostomi	1	Life before LCA of Cellular_organisms - Cellular organisms	12	Bilateria
ENSG00000048545	0	Euteleostomi	1	Life before LCA of Cellular_organisms - Cellular organisms	9	Euteleostomi
ENSG00000048649	0	Euteleostomi	1	Life before LCA of Cellular_organisms - Cellular organisms	9	Euteleostomi
ENSG00000048707	0	Euteleostomi	2	Cellular organisms - Eukaryota	12	Bilateria
ENSG00000048740	0	Euteleostomi	1	Life before LCA of Cellular_organisms - Cellular organisms	12	Bilateria
ENSG00000048828	1	Tetrapoda	3	Eukaryota - Opisthokonta	11	Deuterostomia
ENSG00000048991	0	Euteleostomi	1	Life before LCA of Cellular_organisms - Cellular organisms	9	Euteleostomi
ENSG00000049089	0	Euteleostomi	1	Life before LCA of Cellular_organisms - Cellular organisms	0	HUMAN
ENSG00000049130	2	Amniota	12	Craniata - Euteleostomi	8	Tetrapoda
ENSG00000049167	0	Euteleostomi	1	Life before LCA of Cellular_organisms - Cellular organisms	11	Deuterostomia
ENSG00000049192	0	Euteleostomi	2	Cellular organisms - Eukaryota	11	Deuterostomia
ENSG00000049239	0	Euteleostomi	1	Life before LCA of Cellular_organisms - Cellular organisms	9	Euteleostomi
ENSG00000049245	1	Tetrapoda	2	Cellular organisms - Eukaryota	9	Euteleostomi
ENSG00000049246	1	Tetrapoda	1	Life before LCA of Cellular_organisms - Cellular organisms	9	Euteleostomi
ENSG00000049247	1	Tetrapoda	14	Tetrapoda - Amniota	7	Amniota
ENSG00000049249	3	Mammalia	2	Cellular organisms - Eukaryota	7	Amniota
ENSG00000049283	0	Euteleostomi	1	Life before LCA of Cellular_organisms - Cellular organisms	6	Mammalia
ENSG00000049323	0	Euteleostomi	1	Life before LCA of Cellular_organisms - Cellular organisms	9	Euteleostomi
ENSG00000049449	0	Euteleostomi	1	Life before LCA of Cellular_organisms - Cellular organisms	9	Euteleostomi
ENSG00000049540	3	Mammalia	16	Mammalia - Eutheria	3	Euarchontoglires
ENSG00000049541	0	Euteleostomi	1	Life before LCA of Cellular_organisms - Cellular organisms	15	Cellular_Organisms
ENSG00000049618	0	Euteleostomi	2	Cellular organisms - Eukaryota	11	Deuterostomia
ENSG00000049656	0	Euteleostomi	2	Cellular organisms - Eukaryota	14	Eukaryota
ENSG00000049759	0	Euteleostomi	2	Cellular organisms - Eukaryota	12	Bilateria
ENSG00000049768	1	Tetrapoda	3	Eukaryota - Opisthokonta	6	Mammalia
ENSG00000049769	0	Euteleostomi	7	Eumetazoa - Bilateria	4	Eutheria
ENSG00000049860	0	Euteleostomi	1	Life before LCA of Cellular_organisms - Cellular organisms	12	Bilateria
ENSG00000049883	1	Tetrapoda	7	Eumetazoa - Bilateria	7	Amniota
ENSG00000050030	0	Euteleostomi	11	Olfactores - Craniata	9	Euteleostomi
ENSG00000050130	0	Euteleostomi	5	Holozoa - Metazoa	12	Bilateria
ENSG00000050165	0	Euteleostomi	6	Metazoa - Eumetazoa	9	Euteleostomi
ENSG00000050327	1	Tetrapoda	2	Cellular organisms - Eukaryota	8	Tetrapoda
ENSG00000050344	1	Tetrapoda	5	Holozoa - Metazoa	4	Eutheria
ENSG00000050393	0	Euteleostomi	2	Cellular organisms - Eukaryota	7	Amniota
ENSG00000050405	0	Euteleostomi	2	Cellular organisms - Eukaryota	9	Euteleostomi
ENSG00000050426	1	Tetrapoda	2	Cellular organisms - Eukaryota	12	Bilateria
ENSG00000050438	0	Euteleostomi	1	Life before LCA of Cellular_organisms - Cellular organisms	12	Bilateria
ENSG00000050555	0	Euteleostomi	1	Life before LCA of Cellular_organisms - Cellular organisms	12	Bilateria
ENSG00000050628	0	Euteleostomi	6	Metazoa - Eumetazoa	9	Euteleostomi
ENSG00000050730	1	Tetrapoda	6	Metazoa - Eumetazoa	7	Amniota
ENSG00000050748	0	Euteleostomi	1	Life before LCA of Cellular_organisms - Cellular organisms	12	Bilateria
ENSG00000050767	2	Amniota	1	Life before LCA of Cellular_organisms - Cellular organisms	7	Amniota
ENSG00000050820	0	Euteleostomi	1	Life before LCA of Cellular_organisms - Cellular organisms	11	Deuterostomia
ENSG00000051009	0	Euteleostomi	3	Eukaryota - Opisthokonta	12	Bilateria
ENSG00000051108	0	Euteleostomi	3	Eukaryota - Opisthokonta	10	Chordata
ENSG00000051128	0	Euteleostomi	2	Cellular organisms - Eukaryota	9	Euteleostomi
ENSG00000051180	0	Euteleostomi	1	Life before LCA of Cellular_organisms - Cellular organisms	15	Cellular_Organisms
ENSG00000051341	0	Euteleostomi	1	Life before LCA of Cellular_organisms - Cellular organisms	11	Deuterostomia
ENSG00000051382	0	Euteleostomi	2	Cellular organisms - Eukaryota	12	Bilateria
ENSG00000051523	0	Euteleostomi	3	Eukaryota - Opisthokonta	9	Euteleostomi
ENSG00000051596	2	Amniota	1	Life before LCA of Cellular_organisms - Cellular organisms	13	Opisthokonta
ENSG00000051620	3	Mammalia	1	Life before LCA of Cellular_organisms - Cellular organisms	11	Deuterostomia
ENSG00000051825	1	Tetrapoda	1	Life before LCA of Cellular_organisms - Cellular organisms	7	Amniota
ENSG00000052126	0	Euteleostomi	2	Cellular organisms - Eukaryota	9	Euteleostomi
ENSG00000052344	1	Tetrapoda	1	Life before LCA of Cellular_organisms - Cellular organisms	9	Euteleostomi
ENSG00000052723	0	Euteleostomi	6	Metazoa - Eumetazoa	9	Euteleostomi
ENSG00000052749	0	Euteleostomi	2	Cellular organisms - Eukaryota	14	Eukaryota
ENSG00000052795	1	Tetrapoda	3	Eukaryota - Opisthokonta	11	Deuterostomia
ENSG00000052802	0	Euteleostomi	1	Life before LCA of Cellular_organisms - Cellular organisms	7	Amniota
ENSG00000052841	0	Euteleostomi	1	Life before LCA of Cellular_organisms - Cellular organisms	12	Bilateria
ENSG00000052850	0	Euteleostomi	2	Cellular organisms - Eukaryota	8	Tetrapoda
ENSG00000053108	0	Euteleostomi	2	Cellular organisms - Eukaryota	11	Deuterostomia
ENSG00000053254	0	Euteleostomi	3	Eukaryota - Opisthokonta	11	Deuterostomia
ENSG00000053328	0	Euteleostomi	1	Life before LCA of Cellular_organisms - Cellular organisms	10	Chordata
ENSG00000053371			1	Life before LCA of Cellular_organisms - Cellular organisms	10	Chordata
ENSG00000053372	0	Euteleostomi	1	Life before LCA of Cellular_organisms - Cellular organisms	14	Eukaryota
ENSG00000053438	4	Theria	16	Mammalia - Eutheria	4	Eutheria
ENSG00000053501	0	Euteleostomi	2	Cellular organisms - Eukaryota	12	Bilateria
ENSG00000053524	0	Euteleostomi	3	Eukaryota - Opisthokonta	12	Bilateria
ENSG00000053702	0	Euteleostomi	12	Craniata - Euteleostomi	5	Theria
ENSG00000053747	0	Euteleostomi	1	Life before LCA of Cellular_organisms - Cellular organisms	12	Bilateria
ENSG00000053770	0	Euteleostomi	2	Cellular organisms - Eukaryota	9	Euteleostomi
ENSG00000053900	0	Euteleostomi	2	Cellular organisms - Eukaryota	13	Opisthokonta
ENSG00000053918	0	Euteleostomi	1	Life before LCA of Cellular_organisms - Cellular organisms	4	Eutheria
ENSG00000054116	0	Euteleostomi	2	Cellular organisms - Eukaryota	14	Eukaryota
ENSG00000054118	0	Euteleostomi	2	Cellular organisms - Eukaryota	8	Tetrapoda
ENSG00000054148	1	Tetrapoda	13	Euteleostomi - Tetrapoda	12	Bilateria
ENSG00000054179	0	Euteleostomi	1	Life before LCA of Cellular_organisms - Cellular organisms	9	Euteleostomi
ENSG00000054219	1	Tetrapoda	1	Life before LCA of Cellular_organisms - Cellular organisms	11	Deuterostomia
ENSG00000054267	0	Euteleostomi	2	Cellular organisms - Eukaryota	11	Deuterostomia
ENSG00000054277	0	Euteleostomi	6	Metazoa - Eumetazoa	5	Theria
ENSG00000054282	0	Euteleostomi	1	Life before LCA of Cellular_organisms - Cellular organisms	8	Tetrapoda
ENSG00000054356	0	Euteleostomi	2	Cellular organisms - Eukaryota	12	Bilateria
ENSG00000054392	0	Euteleostomi	1	Life before LCA of Cellular_organisms - Cellular organisms	12	Bilateria
ENSG00000054523	0	Euteleostomi	2	Cellular organisms - Eukaryota	12	Bilateria
ENSG00000054598	0	Euteleostomi	3	Eukaryota - Opisthokonta	9	Euteleostomi
ENSG00000054611	0	Euteleostomi	2	Cellular organisms - Eukaryota	14	Eukaryota
ENSG00000054654	0	Euteleostomi	1	Life before LCA of Cellular_organisms - Cellular organisms	11	Deuterostomia
ENSG00000054690	0	Euteleostomi	2	Cellular organisms - Eukaryota	12	Bilateria
ENSG00000054793	0	Euteleostomi	1	Life before LCA of Cellular_organisms - Cellular organisms	14	Eukaryota
ENSG00000054796	0	Euteleostomi	1	Life before LCA of Cellular_organisms - Cellular organisms	15	Cellular_Organisms
ENSG00000054803	0	Euteleostomi	7	Eumetazoa - Bilateria	9	Euteleostomi
ENSG00000054938	0	Euteleostomi	6	Metazoa - Eumetazoa	7	Amniota
ENSG00000054965	0	Euteleostomi	11	Olfactores - Craniata	9	Euteleostomi
ENSG00000054967	0	Euteleostomi	6	Metazoa - Eumetazoa	5	Theria
ENSG00000054983	0	Euteleostomi	1	Life before LCA of Cellular_organisms - Cellular organisms	11	Deuterostomia
ENSG00000055044	0	Euteleostomi	1	Life before LCA of Cellular_organisms - Cellular organisms	14	Eukaryota
ENSG00000055070	0	Euteleostomi	3	Eukaryota - Opisthokonta	10	Chordata
ENSG00000055118	0	Euteleostomi	1	Life before LCA of Cellular_organisms - Cellular organisms	12	Bilateria
ENSG00000055130	0	Euteleostomi	2	Cellular organisms - Eukaryota	14	Eukaryota
ENSG00000055147	0	Euteleostomi	6	Metazoa - Eumetazoa	7	Amniota
ENSG00000055163	0	Euteleostomi	2	Cellular organisms - Eukaryota	12	Bilateria
ENSG00000055208	0	Euteleostomi	6	Metazoa - Eumetazoa	10	Chordata
ENSG00000055211	2	Amniota	9	Deuterostomia - Chordata	7	Amniota
ENSG00000055332	1	Tetrapoda	1	Life before LCA of Cellular_organisms - Cellular organisms	9	Euteleostomi
ENSG00000055483	0	Euteleostomi	2	Cellular organisms - Eukaryota	10	Chordata
ENSG00000055609	0	Euteleostomi	1	Life before LCA of Cellular_organisms - Cellular organisms	12	Bilateria
ENSG00000055732	0	Euteleostomi	2	Cellular organisms - Eukaryota	12	Bilateria
ENSG00000055813	0	Euteleostomi	2	Cellular organisms - Eukaryota	9	Euteleostomi
ENSG00000055917	0	Euteleostomi	2	Cellular organisms - Eukaryota	14	Eukaryota
ENSG00000055950	0	Euteleostomi	2	Cellular organisms - Eukaryota	14	Eukaryota
ENSG00000055955	0	Euteleostomi	1	Life before LCA of Cellular_organisms - Cellular organisms	11	Deuterostomia
ENSG00000055957	0	Euteleostomi	1	Life before LCA of Cellular_organisms - Cellular organisms	11	Deuterostomia
ENSG00000056050	0	Euteleostomi	4	Opisthokonta - Holozoa	12	Bilateria
ENSG00000056097	0	Euteleostomi	5	Holozoa - Metazoa	12	Bilateria
ENSG00000056277	5	Eutheria	2	Cellular organisms - Eukaryota	8	Tetrapoda
ENSG00000056291	0	Euteleostomi	6	Metazoa - Eumetazoa	9	Euteleostomi
ENSG00000056487	0	Euteleostomi	2	Cellular organisms - Eukaryota	8	Tetrapoda
ENSG00000056558	1	Tetrapoda	5	Holozoa - Metazoa	8	Tetrapoda
ENSG00000056586	0	Euteleostomi	2	Cellular organisms - Eukaryota	12	Bilateria
ENSG00000056661	0	Euteleostomi	2	Cellular organisms - Eukaryota	5	Theria
ENSG00000056736	3	Mammalia	9	Deuterostomia - Chordata	5	Theria
ENSG00000056972	1	Tetrapoda	9	Deuterostomia - Chordata	10	Chordata
ENSG00000056998	2	Amniota	1	Life before LCA of Cellular_organisms - Cellular organisms	12	Bilateria
ENSG00000057019	0	Euteleostomi	1	Life before LCA of Cellular_organisms - Cellular organisms	9	Euteleostomi
ENSG00000057149	6	Boreoeutheria	1	Life before LCA of Cellular_organisms - Cellular organisms	12	Bilateria
ENSG00000057252	0	Euteleostomi	2	Cellular organisms - Eukaryota	12	Bilateria
ENSG00000057294	2	Amniota	3	Eukaryota - Opisthokonta	7	Amniota
ENSG00000057468	0	Euteleostomi	1	Life before LCA of Cellular_organisms - Cellular organisms	12	Bilateria
ENSG00000057593	0	Euteleostomi	1	Life before LCA of Cellular_organisms - Cellular organisms	9	Euteleostomi
ENSG00000057608	0	Euteleostomi	2	Cellular organisms - Eukaryota	14	Eukaryota
ENSG00000057657	0	Euteleostomi	2	Cellular organisms - Eukaryota	9	Euteleostomi
ENSG00000057663	0	Euteleostomi	2	Cellular organisms - Eukaryota	14	Eukaryota
ENSG00000057704	0	Euteleostomi	3	Eukaryota - Opisthokonta	9	Euteleostomi
ENSG00000057757	0	Euteleostomi	2	Cellular organisms - Eukaryota	14	Eukaryota
ENSG00000057935	2	Amniota	5	Holozoa - Metazoa	12	Bilateria
ENSG00000058056	0	Euteleostomi	2	Cellular organisms - Eukaryota	14	Eukaryota
ENSG00000058063	0	Euteleostomi	1	Life before LCA of Cellular_organisms - Cellular organisms	14	Eukaryota
ENSG00000058085	0	Euteleostomi	1	Life before LCA of Cellular_organisms - Cellular organisms	12	Bilateria
ENSG00000058091	0	Euteleostomi	1	Life before LCA of Cellular_organisms - Cellular organisms	11	Deuterostomia
ENSG00000058262	0	Euteleostomi	1	Life before LCA of Cellular_organisms - Cellular organisms	15	Cellular_Organisms
ENSG00000058272	0	Euteleostomi	1	Life before LCA of Cellular_organisms - Cellular organisms	11	Deuterostomia
ENSG00000058335	0	Euteleostomi	1	Life before LCA of Cellular_organisms - Cellular organisms	9	Euteleostomi
ENSG00000058404	0	Euteleostomi	1	Life before LCA of Cellular_organisms - Cellular organisms	14	Eukaryota
ENSG00000058453	0	Euteleostomi	1	Life before LCA of Cellular_organisms - Cellular organisms	11	Deuterostomia
ENSG00000058600	0	Euteleostomi	2	Cellular organisms - Eukaryota	12	Bilateria
ENSG00000058668	1	Tetrapoda	1	Life before LCA of Cellular_organisms - Cellular organisms	14	Eukaryota
ENSG00000058673	1	Tetrapoda	2	Cellular organisms - Eukaryota	9	Euteleostomi
ENSG00000058729	0	Euteleostomi	1	Life before LCA of Cellular_organisms - Cellular organisms	0	HUMAN
ENSG00000058799	0	Euteleostomi	2	Cellular organisms - Eukaryota	14	Eukaryota
ENSG00000058804	0	Euteleostomi	3	Eukaryota - Opisthokonta	11	Deuterostomia
ENSG00000058866	0	Euteleostomi	1	Life before LCA of Cellular_organisms - Cellular organisms	14	Eukaryota
ENSG00000059122	3	Mammalia	7	Eumetazoa - Bilateria	4	Eutheria
ENSG00000059145	0	Euteleostomi	2	Cellular organisms - Eukaryota	6	Mammalia
ENSG00000059377	0	Euteleostomi	1	Life before LCA of Cellular_organisms - Cellular organisms	9	Euteleostomi
ENSG00000059378	0	Euteleostomi	2	Cellular organisms - Eukaryota	9	Euteleostomi
ENSG00000059573	0	Euteleostomi	1	Life before LCA of Cellular_organisms - Cellular organisms	15	Cellular_Organisms
ENSG00000059588	0	Euteleostomi	1	Life before LCA of Cellular_organisms - Cellular organisms	8	Tetrapoda
ENSG00000059691	0	Euteleostomi	1	Life before LCA of Cellular_organisms - Cellular organisms	15	Cellular_Organisms
ENSG00000059728	0	Euteleostomi	6	Metazoa - Eumetazoa	5	Theria
ENSG00000059758	0	Euteleostomi	1	Life before LCA of Cellular_organisms - Cellular organisms	10	Chordata
ENSG00000059769	0	Euteleostomi	1	Life before LCA of Cellular_organisms - Cellular organisms	5	Theria
ENSG00000059804	1	Tetrapoda	1	Life before LCA of Cellular_organisms - Cellular organisms	14	Eukaryota
ENSG00000059915	0	Euteleostomi	1	Life before LCA of Cellular_organisms - Cellular organisms	1	Homininae
ENSG00000060069	0	Euteleostomi	2	Cellular organisms - Eukaryota	14	Eukaryota
ENSG00000060138	1	Tetrapoda	1	Life before LCA of Cellular_organisms - Cellular organisms	15	Cellular_Organisms
ENSG00000060140	1	Tetrapoda	1	Life before LCA of Cellular_organisms - Cellular organisms	9	Euteleostomi
ENSG00000060237	0	Euteleostomi	1	Life before LCA of Cellular_organisms - Cellular organisms	12	Bilateria
ENSG00000060339	0	Euteleostomi	2	Cellular organisms - Eukaryota	8	Tetrapoda
ENSG00000060491	0	Euteleostomi	1	Life before LCA of Cellular_organisms - Cellular organisms	9	Euteleostomi
ENSG00000060558	0	Euteleostomi	2	Cellular organisms - Eukaryota	0	HUMAN
ENSG00000060566	0	Euteleostomi	6	Metazoa - Eumetazoa	11	Deuterostomia
ENSG00000060642	0	Euteleostomi	1	Life before LCA of Cellular_organisms - Cellular organisms	14	Eukaryota
ENSG00000060656	0	Euteleostomi	2	Cellular organisms - Eukaryota	11	Deuterostomia
ENSG00000060688	0	Euteleostomi	1	Life before LCA of Cellular_organisms - Cellular organisms	14	Eukaryota
ENSG00000060709	0	Euteleostomi	3	Eukaryota - Opisthokonta	12	Bilateria
ENSG00000060718	0	Euteleostomi	1	Life before LCA of Cellular_organisms - Cellular organisms	11	Deuterostomia
ENSG00000060749	0	Euteleostomi	1	Life before LCA of Cellular_organisms - Cellular organisms	8	Tetrapoda
ENSG00000060762	0	Euteleostomi	2	Cellular organisms - Eukaryota	14	Eukaryota
ENSG00000060971	0	Euteleostomi	1	Life before LCA of Cellular_organisms - Cellular organisms	9	Euteleostomi
ENSG00000060982	2	Amniota	1	Life before LCA of Cellular_organisms - Cellular organisms	15	Cellular_Organisms
ENSG00000061273	0	Euteleostomi	1	Life before LCA of Cellular_organisms - Cellular organisms	12	Bilateria
ENSG00000061337	0	Euteleostomi	3	Eukaryota - Opisthokonta	0	HUMAN
ENSG00000061455	0	Euteleostomi	2	Cellular organisms - Eukaryota	8	Tetrapoda
ENSG00000061492	0	Euteleostomi	5	Holozoa - Metazoa	4	Eutheria
ENSG00000061656	4	Theria	2	Cellular organisms - Eukaryota	5	Theria
ENSG00000061676	0	Euteleostomi	2	Cellular organisms - Eukaryota	12	Bilateria
ENSG00000061794	0	Euteleostomi	5	Holozoa - Metazoa	12	Bilateria
ENSG00000061918	0	Euteleostomi	1	Life before LCA of Cellular_organisms - Cellular organisms	12	Bilateria
ENSG00000061936	0	Euteleostomi	2	Cellular organisms - Eukaryota	10	Chordata
ENSG00000061938	0	Euteleostomi	1	Life before LCA of Cellular_organisms - Cellular organisms	12	Bilateria
ENSG00000061987	0	Euteleostomi	2	Cellular organisms - Eukaryota	13	Opisthokonta
ENSG00000062038	1	Tetrapoda	1	Life before LCA of Cellular_organisms - Cellular organisms	10	Chordata
ENSG00000062096	2	Amniota	1	Life before LCA of Cellular_organisms - Cellular organisms	9	Euteleostomi
ENSG00000062194	1	Tetrapoda	3	Eukaryota - Opisthokonta	8	Tetrapoda
ENSG00000062282	0	Euteleostomi	1	Life before LCA of Cellular_organisms - Cellular organisms	9	Euteleostomi
ENSG00000062370	5	Eutheria	2	Cellular organisms - Eukaryota	ZNF285	ZNF285
ENSG00000062485	0	Euteleostomi	1	Life before LCA of Cellular_organisms - Cellular organisms	14	Eukaryota
ENSG00000062524	0	Euteleostomi	1	Life before LCA of Cellular_organisms - Cellular organisms	9	Euteleostomi
ENSG00000062582	0	Euteleostomi	6	Metazoa - Eumetazoa	12	Bilateria
ENSG00000062598	0	Euteleostomi	2	Cellular organisms - Eukaryota	12	Bilateria
ENSG00000062650	0	Euteleostomi	1	Life before LCA of Cellular_organisms - Cellular organisms	12	Bilateria
ENSG00000062716	0	Euteleostomi	1	Life before LCA of Cellular_organisms - Cellular organisms	14	Eukaryota
ENSG00000062725	0	Euteleostomi	1	Life before LCA of Cellular_organisms - Cellular organisms	9	Euteleostomi
ENSG00000062822	0	Euteleostomi	1	Life before LCA of Cellular_organisms - Cellular organisms	15	Cellular_Organisms
ENSG00000063015	0	Euteleostomi	1	Life before LCA of Cellular_organisms - Cellular organisms	8	Tetrapoda
ENSG00000063046	0	Euteleostomi	3	Eukaryota - Opisthokonta	11	Deuterostomia
ENSG00000063127	5	Eutheria	1	Life before LCA of Cellular_organisms - Cellular organisms	4	Eutheria
ENSG00000063169	0	Euteleostomi	3	Eukaryota - Opisthokonta	9	Euteleostomi
ENSG00000063176	0	Euteleostomi	1	Life before LCA of Cellular_organisms - Cellular organisms	4	Eutheria
ENSG00000063177	0	Euteleostomi	1	Life before LCA of Cellular_organisms - Cellular organisms	14	Eukaryota
ENSG00000063180	4	Theria	1	Life before LCA of Cellular_organisms - Cellular organisms	5	Theria
ENSG00000063241	0	Euteleostomi	1	Life before LCA of Cellular_organisms - Cellular organisms	12	Bilateria
ENSG00000063244	0	Euteleostomi	1	Life before LCA of Cellular_organisms - Cellular organisms	4	Eutheria
ENSG00000063245	0	Euteleostomi	2	Cellular organisms - Eukaryota	12	Bilateria
ENSG00000063322	0	Euteleostomi	7	Eumetazoa - Bilateria	5	Theria
ENSG00000063438	0	Euteleostomi	6	Metazoa - Eumetazoa	9	Euteleostomi
ENSG00000063515	0	Euteleostomi	2	Cellular organisms - Eukaryota	7	Amniota
ENSG00000063587	5	Eutheria	2	Cellular organisms - Eukaryota	5	Theria
ENSG00000063601	0	Euteleostomi	2	Cellular organisms - Eukaryota	12	Bilateria
ENSG00000063660	0	Euteleostomi	6	Metazoa - Eumetazoa	9	Euteleostomi
ENSG00000063761	0	Euteleostomi	1	Life before LCA of Cellular_organisms - Cellular organisms	15	Cellular_Organisms
ENSG00000063854	0	Euteleostomi	1	Life before LCA of Cellular_organisms - Cellular organisms	14	Eukaryota
ENSG00000063978	0	Euteleostomi	2	Cellular organisms - Eukaryota	10	Chordata
ENSG00000064012	0	Euteleostomi	1	Life before LCA of Cellular_organisms - Cellular organisms	11	Deuterostomia
ENSG00000064042	0	Euteleostomi	2	Cellular organisms - Eukaryota	8	Tetrapoda
ENSG00000064102	0	Euteleostomi	2	Cellular organisms - Eukaryota	12	Bilateria
ENSG00000064115	0	Euteleostomi	4	Opisthokonta - Holozoa	9	Euteleostomi
ENSG00000064195	0	Euteleostomi	2	Cellular organisms - Eukaryota	9	Euteleostomi
ENSG00000064199	1	Tetrapoda	6	Metazoa - Eumetazoa	10	Chordata
ENSG00000064201	3	Mammalia	11	Olfactores - Craniata	7	Amniota
ENSG00000064205	1	Tetrapoda	7	Eumetazoa - Bilateria	9	Euteleostomi
ENSG00000064218	0	Euteleostomi	6	Metazoa - Eumetazoa	9	Euteleostomi
ENSG00000064225	1	Tetrapoda	7	Eumetazoa - Bilateria	8	Tetrapoda
ENSG00000064270	1	Tetrapoda	1	Life before LCA of Cellular_organisms - Cellular organisms	14	Eukaryota
ENSG00000064300	0	Euteleostomi	1	Life before LCA of Cellular_organisms - Cellular organisms	11	Deuterostomia
ENSG00000064309	0	Euteleostomi	1	Life before LCA of Cellular_organisms - Cellular organisms	9	Euteleostomi
ENSG00000064313	0	Euteleostomi	1	Life before LCA of Cellular_organisms - Cellular organisms	13	Opisthokonta
ENSG00000064393	0	Euteleostomi	1	Life before LCA of Cellular_organisms - Cellular organisms	12	Bilateria
ENSG00000064419	0	Euteleostomi	2	Cellular organisms - Eukaryota	13	Opisthokonta
ENSG00000064489	0	Euteleostomi	2	Cellular organisms - Eukaryota	6	Mammalia
ENSG00000064490	0	Euteleostomi	1	Life before LCA of Cellular_organisms - Cellular organisms	9	Euteleostomi
ENSG00000064545	0	Euteleostomi	6	Metazoa - Eumetazoa	6	Mammalia
ENSG00000064547	0	Euteleostomi	6	Metazoa - Eumetazoa	9	Euteleostomi
ENSG00000064601	0	Euteleostomi	1	Life before LCA of Cellular_organisms - Cellular organisms	14	Eukaryota
ENSG00000064607	1	Tetrapoda	2	Cellular organisms - Eukaryota	7	Amniota
ENSG00000064651	0	Euteleostomi	1	Life before LCA of Cellular_organisms - Cellular organisms	12	Bilateria
ENSG00000064652	0	Euteleostomi	2	Cellular organisms - Eukaryota	9	Euteleostomi
ENSG00000064655	1	Tetrapoda	2	Cellular organisms - Eukaryota	12	Bilateria
ENSG00000064666	0	Euteleostomi	2	Cellular organisms - Eukaryota	9	Euteleostomi
ENSG00000064687	0	Euteleostomi	1	Life before LCA of Cellular_organisms - Cellular organisms	15	Cellular_Organisms
ENSG00000064692	0	Euteleostomi	1	Life before LCA of Cellular_organisms - Cellular organisms	8	Tetrapoda
ENSG00000064703	0	Euteleostomi	1	Life before LCA of Cellular_organisms - Cellular organisms	12	Bilateria
ENSG00000064726	0	Euteleostomi	2	Cellular organisms - Eukaryota	11	Deuterostomia
ENSG00000064763	2	Amniota	1	Life before LCA of Cellular_organisms - Cellular organisms	14	Eukaryota
ENSG00000064787	2	Amniota	2	Cellular organisms - Eukaryota	7	Amniota
ENSG00000064835	0	Euteleostomi	2	Cellular organisms - Eukaryota	9	Euteleostomi
ENSG00000064886	4	Theria	1	Life before LCA of Cellular_organisms - Cellular organisms	2	Catarrhini
ENSG00000064932	0	Euteleostomi	1	Life before LCA of Cellular_organisms - Cellular organisms	12	Bilateria
ENSG00000064933	0	Euteleostomi	1	Life before LCA of Cellular_organisms - Cellular organisms	11	Deuterostomia
ENSG00000064961	1	Tetrapoda	6	Metazoa - Eumetazoa	0	HUMAN
ENSG00000064989	0	Euteleostomi	6	Metazoa - Eumetazoa	9	Euteleostomi
ENSG00000064995	0	Euteleostomi	2	Cellular organisms - Eukaryota	12	Bilateria
ENSG00000064999	0	Euteleostomi	1	Life before LCA of Cellular_organisms - Cellular organisms	8	Tetrapoda
ENSG00000065000	0	Euteleostomi	2	Cellular organisms - Eukaryota	14	Eukaryota
ENSG00000065029	2	Amniota	2	Cellular organisms - Eukaryota	9	Euteleostomi
ENSG00000065054	0	Euteleostomi	1	Life before LCA of Cellular_organisms - Cellular organisms	9	Euteleostomi
ENSG00000065057	0	Euteleostomi	1	Life before LCA of Cellular_organisms - Cellular organisms	15	Cellular_Organisms
ENSG00000065060	0	Euteleostomi	2	Cellular organisms - Eukaryota	12	Bilateria
ENSG00000065135	0	Euteleostomi	2	Cellular organisms - Eukaryota	12	Bilateria
ENSG00000065150	0	Euteleostomi	2	Cellular organisms - Eukaryota	14	Eukaryota
ENSG00000065154	0	Euteleostomi	1	Life before LCA of Cellular_organisms - Cellular organisms	15	Cellular_Organisms
ENSG00000065183	0	Euteleostomi	1	Life before LCA of Cellular_organisms - Cellular organisms	14	Eukaryota
ENSG00000065243	0	Euteleostomi	1	Life before LCA of Cellular_organisms - Cellular organisms	12	Bilateria
ENSG00000065268	0	Euteleostomi	1	Life before LCA of Cellular_organisms - Cellular organisms	14	Eukaryota
ENSG00000065308	0	Euteleostomi	3	Eukaryota - Opisthokonta	9	Euteleostomi
ENSG00000065320	0	Euteleostomi	2	Cellular organisms - Eukaryota	12	Bilateria
ENSG00000065325	0	Euteleostomi	6	Metazoa - Eumetazoa	8	Tetrapoda
ENSG00000065328	0	Euteleostomi	2	Cellular organisms - Eukaryota	12	Bilateria
ENSG00000065357	0	Euteleostomi	2	Cellular organisms - Eukaryota	14	Eukaryota
ENSG00000065361	0	Euteleostomi	1	Life before LCA of Cellular_organisms - Cellular organisms	12	Bilateria
ENSG00000065371	4	Theria	2	Cellular organisms - Eukaryota	6	Mammalia
ENSG00000065413	0	Euteleostomi	1	Life before LCA of Cellular_organisms - Cellular organisms	14	Eukaryota
ENSG00000065427	0	Euteleostomi	1	Life before LCA of Cellular_organisms - Cellular organisms	15	Cellular_Organisms
ENSG00000065457	0	Euteleostomi	2	Cellular organisms - Eukaryota	11	Deuterostomia
ENSG00000065485	0	Euteleostomi	1	Life before LCA of Cellular_organisms - Cellular organisms	11	Deuterostomia
ENSG00000065491	0	Euteleostomi	2	Cellular organisms - Eukaryota	14	Eukaryota
ENSG00000065518	3	Mammalia	7	Eumetazoa - Bilateria	5	Theria
ENSG00000065526	0	Euteleostomi	1	Life before LCA of Cellular_organisms - Cellular organisms	9	Euteleostomi
ENSG00000065534	0	Euteleostomi	1	Life before LCA of Cellular_organisms - Cellular organisms	9	Euteleostomi
ENSG00000065548	0	Euteleostomi	2	Cellular organisms - Eukaryota	14	Eukaryota
ENSG00000065559	0	Euteleostomi	1	Life before LCA of Cellular_organisms - Cellular organisms	12	Bilateria
ENSG00000065600	0	Euteleostomi	5	Holozoa - Metazoa	9	Euteleostomi
ENSG00000065609	0	Euteleostomi	2	Cellular organisms - Eukaryota	0	HUMAN
ENSG00000065613	0	Euteleostomi	1	Life before LCA of Cellular_organisms - Cellular organisms	12	Bilateria
ENSG00000065615	0	Euteleostomi	1	Life before LCA of Cellular_organisms - Cellular organisms	14	Eukaryota
ENSG00000065618	0	Euteleostomi	1	Life before LCA of Cellular_organisms - Cellular organisms	7	Amniota
ENSG00000065621	0	Euteleostomi	1	Life before LCA of Cellular_organisms - Cellular organisms	12	Bilateria
ENSG00000065665	2	Amniota	1	Life before LCA of Cellular_organisms - Cellular organisms	15	Cellular_Organisms
ENSG00000065675	1	Tetrapoda	1	Life before LCA of Cellular_organisms - Cellular organisms	12	Bilateria
ENSG00000065717	0	Euteleostomi	1	Life before LCA of Cellular_organisms - Cellular organisms	12	Bilateria
ENSG00000065802	0	Euteleostomi	1	Life before LCA of Cellular_organisms - Cellular organisms	9	Euteleostomi
ENSG00000065809	0	Euteleostomi	7	Eumetazoa - Bilateria	0	HUMAN
ENSG00000065833	1	Tetrapoda	1	Life before LCA of Cellular_organisms - Cellular organisms	15	Cellular_Organisms
ENSG00000065882	0	Euteleostomi	2	Cellular organisms - Eukaryota	9	Euteleostomi
ENSG00000065883	1	Tetrapoda	1	Life before LCA of Cellular_organisms - Cellular organisms	13	Opisthokonta
ENSG00000065911	0	Euteleostomi	1	Life before LCA of Cellular_organisms - Cellular organisms	15	Cellular_Organisms
ENSG00000065923	0	Euteleostomi	1	Life before LCA of Cellular_organisms - Cellular organisms	13	Opisthokonta
ENSG00000065970	0	Euteleostomi	3	Eukaryota - Opisthokonta	8	Tetrapoda
ENSG00000065978	0	Euteleostomi	1	Life before LCA of Cellular_organisms - Cellular organisms	9	Euteleostomi
ENSG00000065989	0	Euteleostomi	2	Cellular organisms - Eukaryota	14	Eukaryota
ENSG00000066027	0	Euteleostomi	2	Cellular organisms - Eukaryota	13	Opisthokonta
ENSG00000066032	0	Euteleostomi	4	Opisthokonta - Holozoa	12	Bilateria
ENSG00000066044	0	Euteleostomi	1	Life before LCA of Cellular_organisms - Cellular organisms	9	Euteleostomi
ENSG00000066056	0	Euteleostomi	1	Life before LCA of Cellular_organisms - Cellular organisms	11	Deuterostomia
ENSG00000066084	0	Euteleostomi	1	Life before LCA of Cellular_organisms - Cellular organisms	13	Opisthokonta
ENSG00000066117	0	Euteleostomi	1	Life before LCA of Cellular_organisms - Cellular organisms	14	Eukaryota
ENSG00000066135	0	Euteleostomi	2	Cellular organisms - Eukaryota	12	Bilateria
ENSG00000066136	0	Euteleostomi	2	Cellular organisms - Eukaryota	14	Eukaryota
ENSG00000066185	1	Tetrapoda	1	Life before LCA of Cellular_organisms - Cellular organisms	11	Deuterostomia
ENSG00000066230	0	Euteleostomi	1	Life before LCA of Cellular_organisms - Cellular organisms	7	Amniota
ENSG00000066248	0	Euteleostomi	2	Cellular organisms - Eukaryota	10	Chordata
ENSG00000066279	0	Euteleostomi	2	Cellular organisms - Eukaryota	9	Euteleostomi
ENSG00000066294	4	Theria	11	Olfactores - Craniata	6	Mammalia
ENSG00000066322	0	Euteleostomi	2	Cellular organisms - Eukaryota	9	Euteleostomi
ENSG00000066336	0	Euteleostomi	6	Metazoa - Eumetazoa	9	Euteleostomi
ENSG00000066379	0	Euteleostomi	1	Life before LCA of Cellular_organisms - Cellular organisms	5	Theria
ENSG00000066382	0	Euteleostomi	1	Life before LCA of Cellular_organisms - Cellular organisms	12	Bilateria
ENSG00000066405	1	Tetrapoda	10	Chordata - Olfactores	8	Tetrapoda
ENSG00000066422	0	Euteleostomi	2	Cellular organisms - Eukaryota	9	Euteleostomi
ENSG00000066427	0	Euteleostomi	2	Cellular organisms - Eukaryota	9	Euteleostomi
ENSG00000066455	0	Euteleostomi	1	Life before LCA of Cellular_organisms - Cellular organisms	12	Bilateria
ENSG00000066468	0	Euteleostomi	1	Life before LCA of Cellular_organisms - Cellular organisms	12	Bilateria
ENSG00000066557	0	Euteleostomi	1	Life before LCA of Cellular_organisms - Cellular organisms	11	Deuterostomia
ENSG00000066583	1	Tetrapoda	1	Life before LCA of Cellular_organisms - Cellular organisms	12	Bilateria
ENSG00000066629	0	Euteleostomi	1	Life before LCA of Cellular_organisms - Cellular organisms	12	Bilateria
ENSG00000066651	0	Euteleostomi	1	Life before LCA of Cellular_organisms - Cellular organisms	14	Eukaryota
ENSG00000066654	0	Euteleostomi	2	Cellular organisms - Eukaryota	13	Opisthokonta
ENSG00000066697	1	Tetrapoda	2	Cellular organisms - Eukaryota	9	Euteleostomi
ENSG00000066735	0	Euteleostomi	8	Bilateria - Deuterostomia	11	Deuterostomia
ENSG00000066739	0	Euteleostomi	2	Cellular organisms - Eukaryota	12	Bilateria
ENSG00000066777	0	Euteleostomi	1	Life before LCA of Cellular_organisms - Cellular organisms	14	Eukaryota
ENSG00000066813	12	Homininae	1	Life before LCA of Cellular_organisms - Cellular organisms	8	Tetrapoda
ENSG00000066827	0	Euteleostomi	2	Cellular organisms - Eukaryota	6	Mammalia
ENSG00000066855	0	Euteleostomi	4	Opisthokonta - Holozoa	9	Euteleostomi
ENSG00000066923	1	Tetrapoda	2	Cellular organisms - Eukaryota	13	Opisthokonta
ENSG00000066926	0	Euteleostomi	1	Life before LCA of Cellular_organisms - Cellular organisms	15	Cellular_Organisms
ENSG00000066933	0	Euteleostomi	2	Cellular organisms - Eukaryota	12	Bilateria
ENSG00000067048			1	Life before LCA of Cellular_organisms - Cellular organisms	14	Eukaryota
ENSG00000067057	0	Euteleostomi	1	Life before LCA of Cellular_organisms - Cellular organisms	15	Cellular_Organisms
ENSG00000067064	0	Euteleostomi	1	Life before LCA of Cellular_organisms - Cellular organisms	13	Opisthokonta
ENSG00000067066	4	Theria	2	Cellular organisms - Eukaryota	1	Homininae
ENSG00000067082	0	Euteleostomi	2	Cellular organisms - Eukaryota	0	HUMAN
ENSG00000067113	0	Euteleostomi	1	Life before LCA of Cellular_organisms - Cellular organisms	9	Euteleostomi
ENSG00000067141	0	Euteleostomi	1	Life before LCA of Cellular_organisms - Cellular organisms	9	Euteleostomi
ENSG00000067167	0	Euteleostomi	2	Cellular organisms - Eukaryota	12	Bilateria
ENSG00000067177	1	Tetrapoda	1	Life before LCA of Cellular_organisms - Cellular organisms	12	Bilateria
ENSG00000067182			2	Cellular organisms - Eukaryota	7	Amniota
ENSG00000067191	0	Euteleostomi	4	Opisthokonta - Holozoa	12	Bilateria
ENSG00000067208	0	Euteleostomi	1	Life before LCA of Cellular_organisms - Cellular organisms	14	Eukaryota
ENSG00000067221	0	Euteleostomi	1	Life before LCA of Cellular_organisms - Cellular organisms	9	Euteleostomi
ENSG00000067225	0	Euteleostomi	1	Life before LCA of Cellular_organisms - Cellular organisms	15	Cellular_Organisms
ENSG00000067248	0	Euteleostomi	1	Life before LCA of Cellular_organisms - Cellular organisms	8	Tetrapoda
ENSG00000067334	0	Euteleostomi	1	Life before LCA of Cellular_organisms - Cellular organisms	13	Opisthokonta
ENSG00000067365	0	Euteleostomi	1	Life before LCA of Cellular_organisms - Cellular organisms	8	Tetrapoda
ENSG00000067369	0	Euteleostomi	1	Life before LCA of Cellular_organisms - Cellular organisms	7	Amniota
ENSG00000067445	4	Theria	1	Life before LCA of Cellular_organisms - Cellular organisms	3	Euarchontoglires
ENSG00000067533	0	Euteleostomi	2	Cellular organisms - Eukaryota	7	Amniota
ENSG00000067560	1	Tetrapoda	1	Life before LCA of Cellular_organisms - Cellular organisms	13	Opisthokonta
ENSG00000067596	0	Euteleostomi	1	Life before LCA of Cellular_organisms - Cellular organisms	14	Eukaryota
ENSG00000067606	0	Euteleostomi	1	Life before LCA of Cellular_organisms - Cellular organisms	12	Bilateria
ENSG00000067646			2	Cellular organisms - Eukaryota	9	Euteleostomi
ENSG00000067704	0	Euteleostomi	1	Life before LCA of Cellular_organisms - Cellular organisms	13	Opisthokonta
ENSG00000067715	0	Euteleostomi	2	Cellular organisms - Eukaryota	12	Bilateria
ENSG00000067798	0	Euteleostomi	1	Life before LCA of Cellular_organisms - Cellular organisms	12	Bilateria
ENSG00000067829	0	Euteleostomi	1	Life before LCA of Cellular_organisms - Cellular organisms	13	Opisthokonta
ENSG00000067836	0	Euteleostomi	3	Eukaryota - Opisthokonta	12	Bilateria
ENSG00000067840	0	Euteleostomi	4	Opisthokonta - Holozoa	9	Euteleostomi
ENSG00000067842	0	Euteleostomi	1	Life before LCA of Cellular_organisms - Cellular organisms	14	Eukaryota
ENSG00000067900	0	Euteleostomi	1	Life before LCA of Cellular_organisms - Cellular organisms	12	Bilateria
ENSG00000067955	0	Euteleostomi	6	Metazoa - Eumetazoa	11	Deuterostomia
ENSG00000067992	0	Euteleostomi	1	Life before LCA of Cellular_organisms - Cellular organisms	9	Euteleostomi
ENSG00000068001	0	Euteleostomi	5	Holozoa - Metazoa	7	Amniota
ENSG00000068024	0	Euteleostomi	1	Life before LCA of Cellular_organisms - Cellular organisms	12	Bilateria
ENSG00000068028	0	Euteleostomi	2	Cellular organisms - Eukaryota	9	Euteleostomi
ENSG00000068078	0	Euteleostomi	1	Life before LCA of Cellular_organisms - Cellular organisms	12	Bilateria
ENSG00000068079	3	Mammalia	11	Olfactores - Craniata	8	Tetrapoda
ENSG00000068097	0	Euteleostomi	2	Cellular organisms - Eukaryota	11	Deuterostomia
ENSG00000068120	0	Euteleostomi	1	Life before LCA of Cellular_organisms - Cellular organisms	14	Eukaryota
ENSG00000068137	0	Euteleostomi	2	Cellular organisms - Eukaryota	5	Theria
ENSG00000068305	0	Euteleostomi	2	Cellular organisms - Eukaryota	11	Deuterostomia
ENSG00000068308	0	Euteleostomi	2	Cellular organisms - Eukaryota	4	Eutheria
ENSG00000068323	0	Euteleostomi	3	Eukaryota - Opisthokonta	10	Chordata
ENSG00000068354	0	Euteleostomi	2	Cellular organisms - Eukaryota	6	Mammalia
ENSG00000068366	0	Euteleostomi	1	Life before LCA of Cellular_organisms - Cellular organisms	13	Opisthokonta
ENSG00000068383	0	Euteleostomi	2	Cellular organisms - Eukaryota	12	Bilateria
ENSG00000068394	0	Euteleostomi	2	Cellular organisms - Eukaryota	12	Bilateria
ENSG00000068400	0	Euteleostomi	1	Life before LCA of Cellular_organisms - Cellular organisms	6	Mammalia
ENSG00000068438	0	Euteleostomi	1	Life before LCA of Cellular_organisms - Cellular organisms	14	Eukaryota
ENSG00000068489	3	Mammalia	6	Metazoa - Eumetazoa	8	Tetrapoda
ENSG00000068615	1	Tetrapoda	2	Cellular organisms - Eukaryota	9	Euteleostomi
ENSG00000068650	0	Euteleostomi	1	Life before LCA of Cellular_organisms - Cellular organisms	14	Eukaryota
ENSG00000068654	0	Euteleostomi	1	Life before LCA of Cellular_organisms - Cellular organisms	14	Eukaryota
ENSG00000068697	0	Euteleostomi	6	Metazoa - Eumetazoa	11	Deuterostomia
ENSG00000068724	0	Euteleostomi	1	Life before LCA of Cellular_organisms - Cellular organisms	12	Bilateria
ENSG00000068745	0	Euteleostomi	2	Cellular organisms - Eukaryota	9	Euteleostomi
ENSG00000068781	0	Euteleostomi	2	Cellular organisms - Eukaryota	8	Tetrapoda
ENSG00000068784	0	Euteleostomi	1	Life before LCA of Cellular_organisms - Cellular organisms	11	Deuterostomia
ENSG00000068793	0	Euteleostomi	2	Cellular organisms - Eukaryota	12	Bilateria
ENSG00000068796	0	Euteleostomi	2	Cellular organisms - Eukaryota	14	Eukaryota
ENSG00000068831	0	Euteleostomi	2	Cellular organisms - Eukaryota	9	Euteleostomi
ENSG00000068878	0	Euteleostomi	2	Cellular organisms - Eukaryota	12	Bilateria
ENSG00000068885	0	Euteleostomi	1	Life before LCA of Cellular_organisms - Cellular organisms	5	Theria
ENSG00000068903	0	Euteleostomi	1	Life before LCA of Cellular_organisms - Cellular organisms	14	Eukaryota
ENSG00000068912	0	Euteleostomi	2	Cellular organisms - Eukaryota	12	Bilateria
ENSG00000068971	5	Eutheria	2	Cellular organisms - Eukaryota	13	Opisthokonta
ENSG00000068976	0	Euteleostomi	1	Life before LCA of Cellular_organisms - Cellular organisms	14	Eukaryota
ENSG00000068985	8	Simiiformes	17	Eutheria - Boreoeutheria	1	Homininae
ENSG00000069011	0	Euteleostomi	2	Cellular organisms - Eukaryota	9	Euteleostomi
ENSG00000069018	0	Euteleostomi	4	Opisthokonta - Holozoa	11	Deuterostomia
ENSG00000069020	0	Euteleostomi	1	Life before LCA of Cellular_organisms - Cellular organisms	14	Eukaryota
ENSG00000069122	0	Euteleostomi	6	Metazoa - Eumetazoa	9	Euteleostomi
ENSG00000069188	0	Euteleostomi	1	Life before LCA of Cellular_organisms - Cellular organisms	12	Bilateria
ENSG00000069206	3	Mammalia	1	Life before LCA of Cellular_organisms - Cellular organisms	6	Mammalia
ENSG00000069248	0	Euteleostomi	2	Cellular organisms - Eukaryota	11	Deuterostomia
ENSG00000069275	0	Euteleostomi	12	Craniata - Euteleostomi	9	Euteleostomi
ENSG00000069329	0	Euteleostomi	2	Cellular organisms - Eukaryota	14	Eukaryota
ENSG00000069345	0	Euteleostomi	1	Life before LCA of Cellular_organisms - Cellular organisms	14	Eukaryota
ENSG00000069399	1	Tetrapoda	1	Life before LCA of Cellular_organisms - Cellular organisms	6	Mammalia
ENSG00000069424	0	Euteleostomi	1	Life before LCA of Cellular_organisms - Cellular organisms	15	Cellular_Organisms
ENSG00000069431	1	Tetrapoda	1	Life before LCA of Cellular_organisms - Cellular organisms	14	Eukaryota
ENSG00000069482	4	Theria	12	Craniata - Euteleostomi	8	Tetrapoda
ENSG00000069493			8	Bilateria - Deuterostomia	8	Tetrapoda
ENSG00000069509	0	Euteleostomi	1	Life before LCA of Cellular_organisms - Cellular organisms	9	Euteleostomi
ENSG00000069535	0	Euteleostomi	1	Life before LCA of Cellular_organisms - Cellular organisms	11	Deuterostomia
ENSG00000069667	0	Euteleostomi	5	Holozoa - Metazoa	12	Bilateria
ENSG00000069696	0	Euteleostomi	6	Metazoa - Eumetazoa	0	HUMAN
ENSG00000069702	0	Euteleostomi	6	Metazoa - Eumetazoa	9	Euteleostomi
ENSG00000069712	0	Euteleostomi	1	Life before LCA of Cellular_organisms - Cellular organisms	8	Tetrapoda
ENSG00000069764	2	Amniota	6	Metazoa - Eumetazoa	8	Tetrapoda
ENSG00000069812	0	Euteleostomi	6	Metazoa - Eumetazoa	9	Euteleostomi
ENSG00000069849	1	Tetrapoda	6	Metazoa - Eumetazoa	9	Euteleostomi
ENSG00000069869	0	Euteleostomi	2	Cellular organisms - Eukaryota	12	Bilateria
ENSG00000069943	0	Euteleostomi	1	Life before LCA of Cellular_organisms - Cellular organisms	6	Mammalia
ENSG00000069956	0	Euteleostomi	1	Life before LCA of Cellular_organisms - Cellular organisms	9	Euteleostomi
ENSG00000069966	0	Euteleostomi	1	Life before LCA of Cellular_organisms - Cellular organisms	12	Bilateria
ENSG00000069974	0	Euteleostomi	1	Life before LCA of Cellular_organisms - Cellular organisms	11	Deuterostomia
ENSG00000069998	0	Euteleostomi	2	Cellular organisms - Eukaryota	14	Eukaryota
ENSG00000070010	0	Euteleostomi	2	Cellular organisms - Eukaryota	14	Eukaryota
ENSG00000070018	1	Tetrapoda	1	Life before LCA of Cellular_organisms - Cellular organisms	12	Bilateria
ENSG00000070019	0	Euteleostomi	1	Life before LCA of Cellular_organisms - Cellular organisms	9	Euteleostomi
ENSG00000070031	11	Hominidae	17	Eutheria - Boreoeutheria	1	Homininae
ENSG00000070047	0	Euteleostomi	2	Cellular organisms - Eukaryota	8	Tetrapoda
ENSG00000070061	0	Euteleostomi	1	Life before LCA of Cellular_organisms - Cellular organisms	13	Opisthokonta
ENSG00000070081	0	Euteleostomi	5	Holozoa - Metazoa	12	Bilateria
ENSG00000070087	0	Euteleostomi	2	Cellular organisms - Eukaryota	9	Euteleostomi
ENSG00000070159	0	Euteleostomi	1	Life before LCA of Cellular_organisms - Cellular organisms	12	Bilateria
ENSG00000070182	0	Euteleostomi	1	Life before LCA of Cellular_organisms - Cellular organisms	12	Bilateria
ENSG00000070190	0	Euteleostomi	2	Cellular organisms - Eukaryota	9	Euteleostomi
ENSG00000070193	0	Euteleostomi	6	Metazoa - Eumetazoa	9	Euteleostomi
ENSG00000070214	0	Euteleostomi	2	Cellular organisms - Eukaryota	11	Deuterostomia
ENSG00000070269	0	Euteleostomi	1	Life before LCA of Cellular_organisms - Cellular organisms	8	Tetrapoda
ENSG00000070366	0	Euteleostomi	2	Cellular organisms - Eukaryota	12	Bilateria
ENSG00000070367	0	Euteleostomi	1	Life before LCA of Cellular_organisms - Cellular organisms	13	Opisthokonta
ENSG00000070371	0	Euteleostomi	2	Cellular organisms - Eukaryota	14	Eukaryota
ENSG00000070388	0	Euteleostomi	6	Metazoa - Eumetazoa	6	Mammalia
ENSG00000070404	0	Euteleostomi	2	Cellular organisms - Eukaryota	9	Euteleostomi
ENSG00000070413	0	Euteleostomi	6	Metazoa - Eumetazoa	9	Euteleostomi
ENSG00000070423	0	Euteleostomi	2	Cellular organisms - Eukaryota	9	Euteleostomi
ENSG00000070444	0	Euteleostomi	3	Eukaryota - Opisthokonta	8	Tetrapoda
ENSG00000070476	0	Euteleostomi	2	Cellular organisms - Eukaryota	9	Euteleostomi
ENSG00000070495	0	Euteleostomi	1	Life before LCA of Cellular_organisms - Cellular organisms	14	Eukaryota
ENSG00000070501	0	Euteleostomi	1	Life before LCA of Cellular_organisms - Cellular organisms	9	Euteleostomi
ENSG00000070526	0	Euteleostomi	1	Life before LCA of Cellular_organisms - Cellular organisms	7	Amniota
ENSG00000070540	0	Euteleostomi	1	Life before LCA of Cellular_organisms - Cellular organisms	13	Opisthokonta
ENSG00000070601	0	Euteleostomi	6	Metazoa - Eumetazoa	6	Mammalia
ENSG00000070610	0	Euteleostomi	1	Life before LCA of Cellular_organisms - Cellular organisms	12	Bilateria
ENSG00000070614	0	Euteleostomi	1	Life before LCA of Cellular_organisms - Cellular organisms	12	Bilateria
ENSG00000070669	0	Euteleostomi	1	Life before LCA of Cellular_organisms - Cellular organisms	15	Cellular_Organisms
ENSG00000070718	0	Euteleostomi	2	Cellular organisms - Eukaryota	12	Bilateria
ENSG00000070729	0	Euteleostomi	1	Life before LCA of Cellular_organisms - Cellular organisms	12	Bilateria
ENSG00000070731	1	Tetrapoda	2	Cellular organisms - Eukaryota	9	Euteleostomi
ENSG00000070748	0	Euteleostomi	1	Life before LCA of Cellular_organisms - Cellular organisms	12	Bilateria
ENSG00000070756	0	Euteleostomi	1	Life before LCA of Cellular_organisms - Cellular organisms	14	Eukaryota
ENSG00000070759	1	Tetrapoda	1	Life before LCA of Cellular_organisms - Cellular organisms	11	Deuterostomia
ENSG00000070761	0	Euteleostomi	2	Cellular organisms - Eukaryota	12	Bilateria
ENSG00000070770	0	Euteleostomi	1	Life before LCA of Cellular_organisms - Cellular organisms	14	Eukaryota
ENSG00000070778	0	Euteleostomi	2	Cellular organisms - Eukaryota	11	Deuterostomia
ENSG00000070785	0	Euteleostomi	1	Life before LCA of Cellular_organisms - Cellular organisms	14	Eukaryota
ENSG00000070808	0	Euteleostomi	1	Life before LCA of Cellular_organisms - Cellular organisms	14	Eukaryota
ENSG00000070814	3	Mammalia	13	Euteleostomi - Tetrapoda	4	Eutheria
ENSG00000070831	0	Euteleostomi	1	Life before LCA of Cellular_organisms - Cellular organisms	13	Opisthokonta
ENSG00000070882	0	Euteleostomi	2	Cellular organisms - Eukaryota	9	Euteleostomi
ENSG00000070886	0	Euteleostomi	1	Life before LCA of Cellular_organisms - Cellular organisms	12	Bilateria
ENSG00000070915	0	Euteleostomi	1	Life before LCA of Cellular_organisms - Cellular organisms	12	Bilateria
ENSG00000070950	0	Euteleostomi	2	Cellular organisms - Eukaryota	5	Theria
ENSG00000070961	0	Euteleostomi	1	Life before LCA of Cellular_organisms - Cellular organisms	14	Eukaryota
ENSG00000070985	0	Euteleostomi	3	Eukaryota - Opisthokonta	9	Euteleostomi
ENSG00000071051	0	Euteleostomi	1	Life before LCA of Cellular_organisms - Cellular organisms	12	Bilateria
ENSG00000071054	0	Euteleostomi	1	Life before LCA of Cellular_organisms - Cellular organisms	12	Bilateria
ENSG00000071073	0	Euteleostomi	3	Eukaryota - Opisthokonta	11	Deuterostomia
ENSG00000071082	0	Euteleostomi	1	Life before LCA of Cellular_organisms - Cellular organisms	14	Eukaryota
ENSG00000071127	0	Euteleostomi	1	Life before LCA of Cellular_organisms - Cellular organisms	0	HUMAN
ENSG00000071189	0	Euteleostomi	2	Cellular organisms - Eukaryota	12	Bilateria
ENSG00000071203	3	Mammalia	7	Eumetazoa - Bilateria	3	Euarchontoglires
ENSG00000071205	0	Euteleostomi	2	Cellular organisms - Eukaryota	12	Bilateria
ENSG00000071242	2	Amniota	1	Life before LCA of Cellular_organisms - Cellular organisms	13	Opisthokonta
ENSG00000071243	0	Euteleostomi	2	Cellular organisms - Eukaryota	11	Deuterostomia
ENSG00000071246	0	Euteleostomi	2	Cellular organisms - Eukaryota	10	Chordata
ENSG00000071282	0	Euteleostomi	2	Cellular organisms - Eukaryota	9	Euteleostomi
ENSG00000071462	0	Euteleostomi	1	Life before LCA of Cellular_organisms - Cellular organisms	14	Eukaryota
ENSG00000071537	0	Euteleostomi	1	Life before LCA of Cellular_organisms - Cellular organisms	14	Eukaryota
ENSG00000071539	0	Euteleostomi	1	Life before LCA of Cellular_organisms - Cellular organisms	14	Eukaryota
ENSG00000071553	0	Euteleostomi	6	Metazoa - Eumetazoa	11	Deuterostomia
ENSG00000071564	0	Euteleostomi	5	Holozoa - Metazoa	7	Amniota
ENSG00000071575	0	Euteleostomi	1	Life before LCA of Cellular_organisms - Cellular organisms	11	Deuterostomia
ENSG00000071626	0	Euteleostomi	1	Life before LCA of Cellular_organisms - Cellular organisms	11	Deuterostomia
ENSG00000071655	0	Euteleostomi	6	Metazoa - Eumetazoa	8	Tetrapoda
ENSG00000071677	2	Amniota	12	Craniata - Euteleostomi	4	Eutheria
ENSG00000071794	0	Euteleostomi	1	Life before LCA of Cellular_organisms - Cellular organisms	6	Mammalia
ENSG00000071859	0	Euteleostomi	2	Cellular organisms - Eukaryota	12	Bilateria
ENSG00000071889	0	Euteleostomi	6	Metazoa - Eumetazoa	9	Euteleostomi
ENSG00000071894	0	Euteleostomi	2	Cellular organisms - Eukaryota	14	Eukaryota
ENSG00000071909	0	Euteleostomi	1	Life before LCA of Cellular_organisms - Cellular organisms	9	Euteleostomi
ENSG00000071967	0	Euteleostomi	2	Cellular organisms - Eukaryota	0	HUMAN
ENSG00000071991	2	Amniota	1	Life before LCA of Cellular_organisms - Cellular organisms	10	Chordata
ENSG00000071994	0	Euteleostomi	2	Cellular organisms - Eukaryota	14	Eukaryota
ENSG00000072041	1	Tetrapoda	1	Life before LCA of Cellular_organisms - Cellular organisms	10	Chordata
ENSG00000072042	2	Amniota	1	Life before LCA of Cellular_organisms - Cellular organisms	14	Eukaryota
ENSG00000072062	0	Euteleostomi	1	Life before LCA of Cellular_organisms - Cellular organisms	14	Eukaryota
ENSG00000072071	0	Euteleostomi	2	Cellular organisms - Eukaryota	10	Chordata
ENSG00000072080	3	Mammalia	12	Craniata - Euteleostomi	7	Amniota
ENSG00000072110	0	Euteleostomi	1	Life before LCA of Cellular_organisms - Cellular organisms	13	Opisthokonta
ENSG00000072121	0	Euteleostomi	2	Cellular organisms - Eukaryota	9	Euteleostomi
ENSG00000072133	1	Tetrapoda	1	Life before LCA of Cellular_organisms - Cellular organisms	13	Opisthokonta
ENSG00000072134	0	Euteleostomi	2	Cellular organisms - Eukaryota	12	Bilateria
ENSG00000072135			2	Cellular organisms - Eukaryota	3	Euarchontoglires
ENSG00000072163	2	Amniota	2	Cellular organisms - Eukaryota	12	Bilateria
ENSG00000072182	0	Euteleostomi	5	Holozoa - Metazoa	5	Theria
ENSG00000072195	0	Euteleostomi	1	Life before LCA of Cellular_organisms - Cellular organisms	7	Amniota
ENSG00000072201	0	Euteleostomi	2	Cellular organisms - Eukaryota	9	Euteleostomi
ENSG00000072210	1	Tetrapoda	1	Life before LCA of Cellular_organisms - Cellular organisms	14	Eukaryota
ENSG00000072274	0	Euteleostomi	1	Life before LCA of Cellular_organisms - Cellular organisms	9	Euteleostomi
ENSG00000072310	0	Euteleostomi	2	Cellular organisms - Eukaryota	12	Bilateria
ENSG00000072315	0	Euteleostomi	2	Cellular organisms - Eukaryota	12	Bilateria
ENSG00000072364	0	Euteleostomi	3	Eukaryota - Opisthokonta	9	Euteleostomi
ENSG00000072401	0	Euteleostomi	2	Cellular organisms - Eukaryota	14	Eukaryota
ENSG00000072415	0	Euteleostomi	1	Life before LCA of Cellular_organisms - Cellular organisms	12	Bilateria
ENSG00000072422	1	Tetrapoda	1	Life before LCA of Cellular_organisms - Cellular organisms	11	Deuterostomia
ENSG00000072444	13	Homo Sapiens	1	Life before LCA of Cellular_organisms - Cellular organisms	11	Deuterostomia
ENSG00000072501	0	Euteleostomi	1	Life before LCA of Cellular_organisms - Cellular organisms	14	Eukaryota
ENSG00000072506	0	Euteleostomi	1	Life before LCA of Cellular_organisms - Cellular organisms	12	Bilateria
ENSG00000072518	0	Euteleostomi	1	Life before LCA of Cellular_organisms - Cellular organisms	12	Bilateria
ENSG00000072571	0	Euteleostomi	1	Life before LCA of Cellular_organisms - Cellular organisms	10	Chordata
ENSG00000072609	0	Euteleostomi	1	Life before LCA of Cellular_organisms - Cellular organisms	8	Tetrapoda
ENSG00000072657	0	Euteleostomi	1	Life before LCA of Cellular_organisms - Cellular organisms	7	Amniota
ENSG00000072682	0	Euteleostomi	1	Life before LCA of Cellular_organisms - Cellular organisms	12	Bilateria
ENSG00000072694	3	Mammalia	7	Eumetazoa - Bilateria	6	Mammalia
ENSG00000072736	0	Euteleostomi	6	Metazoa - Eumetazoa	9	Euteleostomi
ENSG00000072756	0	Euteleostomi	1	Life before LCA of Cellular_organisms - Cellular organisms	12	Bilateria
ENSG00000072778	0	Euteleostomi	1	Life before LCA of Cellular_organisms - Cellular organisms	6	Mammalia
ENSG00000072786	0	Euteleostomi	1	Life before LCA of Cellular_organisms - Cellular organisms	12	Bilateria
ENSG00000072803	0	Euteleostomi	1	Life before LCA of Cellular_organisms - Cellular organisms	13	Opisthokonta
ENSG00000072818	0	Euteleostomi	1	Life before LCA of Cellular_organisms - Cellular organisms	12	Bilateria
ENSG00000072832	2	Amniota	1	Life before LCA of Cellular_organisms - Cellular organisms	12	Bilateria
ENSG00000072840	0	Euteleostomi	2	Cellular organisms - Eukaryota	7	Amniota
ENSG00000072849	0	Euteleostomi	2	Cellular organisms - Eukaryota	14	Eukaryota
ENSG00000072858	1	Tetrapoda	2	Cellular organisms - Eukaryota	9	Euteleostomi
ENSG00000072864	0	Euteleostomi	1	Life before LCA of Cellular_organisms - Cellular organisms	9	Euteleostomi
ENSG00000072952	0	Euteleostomi	7	Eumetazoa - Bilateria	7	Amniota
ENSG00000072954	0	Euteleostomi	5	Holozoa - Metazoa	9	Euteleostomi
ENSG00000072958	0	Euteleostomi	2	Cellular organisms - Eukaryota	14	Eukaryota
ENSG00000073008	0	Euteleostomi	7	Eumetazoa - Bilateria	2	Catarrhini
ENSG00000073009	0	Euteleostomi	1	Life before LCA of Cellular_organisms - Cellular organisms	6	Mammalia
ENSG00000073050	0	Euteleostomi	2	Cellular organisms - Eukaryota	9	Euteleostomi
ENSG00000073060	0	Euteleostomi	2	Cellular organisms - Eukaryota	9	Euteleostomi
ENSG00000073067	1	Tetrapoda	1	Life before LCA of Cellular_organisms - Cellular organisms	7	Amniota
ENSG00000073111	0	Euteleostomi	1	Life before LCA of Cellular_organisms - Cellular organisms	14	Eukaryota
ENSG00000073146	0	Euteleostomi	1	Life before LCA of Cellular_organisms - Cellular organisms	11	Deuterostomia
ENSG00000073150	0	Euteleostomi	7	Eumetazoa - Bilateria	7	Amniota
ENSG00000073169	0	Euteleostomi	1	Life before LCA of Cellular_organisms - Cellular organisms
ENSG00000073282	0	Euteleostomi	2	Cellular organisms - Eukaryota	11	Deuterostomia
ENSG00000073331	0	Euteleostomi	2	Cellular organisms - Eukaryota	9	Euteleostomi
ENSG00000073350	0	Euteleostomi	2	Cellular organisms - Eukaryota	11	Deuterostomia
ENSG00000073417	0	Euteleostomi	1	Life before LCA of Cellular_organisms - Cellular organisms	10	Chordata
ENSG00000073464	0	Euteleostomi	1	Life before LCA of Cellular_organisms - Cellular organisms	15	Cellular_Organisms
ENSG00000073536	0	Euteleostomi	1	Life before LCA of Cellular_organisms - Cellular organisms	14	Eukaryota
ENSG00000073578	0	Euteleostomi	1	Life before LCA of Cellular_organisms - Cellular organisms	15	Cellular_Organisms
ENSG00000073584	0	Euteleostomi	2	Cellular organisms - Eukaryota	12	Bilateria
ENSG00000073598	4	Theria	16	Mammalia - Eutheria	4	Eutheria
ENSG00000073605	4	Theria	14	Tetrapoda - Amniota	2	Catarrhini
ENSG00000073614	0	Euteleostomi	2	Cellular organisms - Eukaryota	13	Opisthokonta
ENSG00000073670	0	Euteleostomi	1	Life before LCA of Cellular_organisms - Cellular organisms	9	Euteleostomi
ENSG00000073711	0	Euteleostomi	2	Cellular organisms - Eukaryota	14	Eukaryota
ENSG00000073712	0	Euteleostomi	2	Cellular organisms - Eukaryota	12	Bilateria
ENSG00000073734	0	Euteleostomi	1	Life before LCA of Cellular_organisms - Cellular organisms	15	Cellular_Organisms
ENSG00000073737	0	Euteleostomi	1	Life before LCA of Cellular_organisms - Cellular organisms	8	Tetrapoda
ENSG00000073754	4	Theria	2	Cellular organisms - Eukaryota	5	Theria
ENSG00000073756	0	Euteleostomi	1	Life before LCA of Cellular_organisms - Cellular organisms	10	Chordata
ENSG00000073792	0	Euteleostomi	1	Life before LCA of Cellular_organisms - Cellular organisms	12	Bilateria
ENSG00000073803	0	Euteleostomi	1	Life before LCA of Cellular_organisms - Cellular organisms	12	Bilateria
ENSG00000073849	0	Euteleostomi	2	Cellular organisms - Eukaryota	9	Euteleostomi
ENSG00000073861	0	Euteleostomi	5	Holozoa - Metazoa	6	Mammalia
ENSG00000073910	0	Euteleostomi	2	Cellular organisms - Eukaryota	13	Opisthokonta
ENSG00000073921	0	Euteleostomi	2	Cellular organisms - Eukaryota	12	Bilateria
ENSG00000073969	0	Euteleostomi	1	Life before LCA of Cellular_organisms - Cellular organisms	14	Eukaryota
ENSG00000074047	0	Euteleostomi	1	Life before LCA of Cellular_organisms - Cellular organisms	11	Deuterostomia
ENSG00000074054	0	Euteleostomi	2	Cellular organisms - Eukaryota	12	Bilateria
ENSG00000074071	0	Euteleostomi	7	Eumetazoa - Bilateria	12	Bilateria
ENSG00000074181	0	Euteleostomi	1	Life before LCA of Cellular_organisms - Cellular organisms	12	Bilateria
ENSG00000074201	0	Euteleostomi	2	Cellular organisms - Eukaryota	12	Bilateria
ENSG00000074211	0	Euteleostomi	2	Cellular organisms - Eukaryota	14	Eukaryota
ENSG00000074219			3	Eukaryota - Opisthokonta	4	Eutheria
ENSG00000074266	0	Euteleostomi	1	Life before LCA of Cellular_organisms - Cellular organisms	12	Bilateria
ENSG00000074276	0	Euteleostomi	1	Life before LCA of Cellular_organisms - Cellular organisms	9	Euteleostomi
ENSG00000074317	0	Euteleostomi	11	Olfactores - Craniata	9	Euteleostomi
ENSG00000074319	0	Euteleostomi	2	Cellular organisms - Eukaryota	12	Bilateria
ENSG00000074356	0	Euteleostomi	2	Cellular organisms - Eukaryota	9	Euteleostomi
ENSG00000074370	0	Euteleostomi	1	Life before LCA of Cellular_organisms - Cellular organisms	14	Eukaryota
ENSG00000074410	0	Euteleostomi	1	Life before LCA of Cellular_organisms - Cellular organisms	9	Euteleostomi
ENSG00000074416	0	Euteleostomi	1	Life before LCA of Cellular_organisms - Cellular organisms	15	Cellular_Organisms
ENSG00000074527	0	Euteleostomi	2	Cellular organisms - Eukaryota	10	Chordata
ENSG00000074582	0	Euteleostomi	1	Life before LCA of Cellular_organisms - Cellular organisms	14	Eukaryota
ENSG00000074590	0	Euteleostomi	1	Life before LCA of Cellular_organisms - Cellular organisms	0	HUMAN
ENSG00000074603	1	Tetrapoda	1	Life before LCA of Cellular_organisms - Cellular organisms	12	Bilateria
ENSG00000074621	0	Euteleostomi	1	Life before LCA of Cellular_organisms - Cellular organisms	4	Eutheria
ENSG00000074657	0	Euteleostomi	2	Cellular organisms - Eukaryota	10	Chordata
ENSG00000074660	0	Euteleostomi	1	Life before LCA of Cellular_organisms - Cellular organisms	7	Amniota
ENSG00000074695	0	Euteleostomi	2	Cellular organisms - Eukaryota	12	Bilateria
ENSG00000074696	0	Euteleostomi	2	Cellular organisms - Eukaryota	11	Deuterostomia
ENSG00000074706	0	Euteleostomi	2	Cellular organisms - Eukaryota	7	Amniota
ENSG00000074755	0	Euteleostomi	2	Cellular organisms - Eukaryota	7	Amniota
ENSG00000074771	2	Amniota	1	Life before LCA of Cellular_organisms - Cellular organisms	11	Deuterostomia
ENSG00000074800	0	Euteleostomi	1	Life before LCA of Cellular_organisms - Cellular organisms	15	Cellular_Organisms
ENSG00000074803	0	Euteleostomi	1	Life before LCA of Cellular_organisms - Cellular organisms	12	Bilateria
ENSG00000074842	2	Amniota	2	Cellular organisms - Eukaryota	7	Amniota
ENSG00000074855	0	Euteleostomi	2	Cellular organisms - Eukaryota	12	Bilateria
ENSG00000074935	0	Euteleostomi	1	Life before LCA of Cellular_organisms - Cellular organisms	11	Deuterostomia
ENSG00000074964	0	Euteleostomi	2	Cellular organisms - Eukaryota	8	Tetrapoda
ENSG00000074966	2	Amniota	1	Life before LCA of Cellular_organisms - Cellular organisms	10	Chordata
ENSG00000075035	0	Euteleostomi	1	Life before LCA of Cellular_organisms - Cellular organisms	11	Deuterostomia
ENSG00000075043	0	Euteleostomi	1	Life before LCA of Cellular_organisms - Cellular organisms	10	Chordata
ENSG00000075073	0	Euteleostomi	6	Metazoa - Eumetazoa	7	Amniota
ENSG00000075089	0	Euteleostomi	2	Cellular organisms - Eukaryota	14	Eukaryota
ENSG00000075131	0	Euteleostomi	2	Cellular organisms - Eukaryota	10	Chordata
ENSG00000075142	1	Tetrapoda	2	Cellular organisms - Eukaryota	8	Tetrapoda
ENSG00000075151	0	Euteleostomi	2	Cellular organisms - Eukaryota	10	Chordata
ENSG00000075188	0	Euteleostomi	1	Life before LCA of Cellular_organisms - Cellular organisms	9	Euteleostomi
ENSG00000075213	0	Euteleostomi	6	Metazoa - Eumetazoa	9	Euteleostomi
ENSG00000075218	1	Tetrapoda	2	Cellular organisms - Eukaryota	8	Tetrapoda
ENSG00000075223	1	Tetrapoda	6	Metazoa - Eumetazoa	9	Euteleostomi
ENSG00000075234	0	Euteleostomi	1	Life before LCA of Cellular_organisms - Cellular organisms	9	Euteleostomi
ENSG00000075239	0	Euteleostomi	1	Life before LCA of Cellular_organisms - Cellular organisms	15	Cellular_Organisms
ENSG00000075240	0	Euteleostomi	3	Eukaryota - Opisthokonta	9	Euteleostomi
ENSG00000075275	0	Euteleostomi	1	Life before LCA of Cellular_organisms - Cellular organisms	14	Eukaryota
ENSG00000075290	0	Euteleostomi	5	Holozoa - Metazoa	7	Amniota
ENSG00000075292	0	Euteleostomi	1	Life before LCA of Cellular_organisms - Cellular organisms	8	Tetrapoda
ENSG00000075303	1	Tetrapoda	2	Cellular organisms - Eukaryota	14	Eukaryota
ENSG00000075336	0	Euteleostomi	2	Cellular organisms - Eukaryota	13	Opisthokonta
ENSG00000075340	0	Euteleostomi	1	Life before LCA of Cellular_organisms - Cellular organisms	13	Opisthokonta
ENSG00000075388	0	Euteleostomi	6	Metazoa - Eumetazoa	9	Euteleostomi
ENSG00000075391	0	Euteleostomi	2	Cellular organisms - Eukaryota	9	Euteleostomi
ENSG00000075399	0	Euteleostomi	7	Eumetazoa - Bilateria	9	Euteleostomi
ENSG00000075407	6	Boreoeutheria	2	Cellular organisms - Eukaryota	2	Catarrhini
ENSG00000075413	0	Euteleostomi	1	Life before LCA of Cellular_organisms - Cellular organisms	12	Bilateria
ENSG00000075415	0	Euteleostomi	2	Cellular organisms - Eukaryota	14	Eukaryota
ENSG00000075420	0	Euteleostomi	1	Life before LCA of Cellular_organisms - Cellular organisms	11	Deuterostomia
ENSG00000075426	0	Euteleostomi	8	Bilateria - Deuterostomia	9	Euteleostomi
ENSG00000075429	0	Euteleostomi	7	Eumetazoa - Bilateria	4	Eutheria
ENSG00000075461	0	Euteleostomi	7	Eumetazoa - Bilateria	9	Euteleostomi
ENSG00000075539	0	Euteleostomi	2	Cellular organisms - Eukaryota	13	Opisthokonta
ENSG00000075568	0	Euteleostomi	2	Cellular organisms - Eukaryota	12	Bilateria
ENSG00000075618	0	Euteleostomi	4	Opisthokonta - Holozoa	11	Deuterostomia
ENSG00000075624	0	Euteleostomi	2	Cellular organisms - Eukaryota	14	Eukaryota
ENSG00000075643	0	Euteleostomi	1	Life before LCA of Cellular_organisms - Cellular organisms	12	Bilateria
ENSG00000075651	1	Tetrapoda	1	Life before LCA of Cellular_organisms - Cellular organisms	13	Opisthokonta
ENSG00000075673	1	Tetrapoda	1	Life before LCA of Cellular_organisms - Cellular organisms	14	Eukaryota
ENSG00000075702	0	Euteleostomi	1	Life before LCA of Cellular_organisms - Cellular organisms	12	Bilateria
ENSG00000075711	0	Euteleostomi	1	Life before LCA of Cellular_organisms - Cellular organisms	12	Bilateria
ENSG00000075785	0	Euteleostomi	11	Olfactores - Craniata	14	Eukaryota
ENSG00000075790	0	Euteleostomi	2	Cellular organisms - Eukaryota	9	Euteleostomi
ENSG00000075826	0	Euteleostomi	1	Life before LCA of Cellular_organisms - Cellular organisms	14	Eukaryota
ENSG00000075856	0	Euteleostomi	1	Life before LCA of Cellular_organisms - Cellular organisms	13	Opisthokonta
ENSG00000075884	1	Tetrapoda	2	Cellular organisms - Eukaryota	5	Theria
ENSG00000075886	12	Homininae	1	Life before LCA of Cellular_organisms - Cellular organisms	14	Eukaryota
ENSG00000075891	0	Euteleostomi	5	Holozoa - Metazoa	0	HUMAN
ENSG00000075914	0	Euteleostomi	1	Life before LCA of Cellular_organisms - Cellular organisms	12	Bilateria
ENSG00000075945	0	Euteleostomi	2	Cellular organisms - Eukaryota	12	Bilateria
ENSG00000075975	0	Euteleostomi	2	Cellular organisms - Eukaryota	9	Euteleostomi
ENSG00000076003	0	Euteleostomi	1	Life before LCA of Cellular_organisms - Cellular organisms	14	Eukaryota
ENSG00000076043	0	Euteleostomi	1	Life before LCA of Cellular_organisms - Cellular organisms	13	Opisthokonta
ENSG00000076053	1	Tetrapoda	1	Life before LCA of Cellular_organisms - Cellular organisms	9	Euteleostomi
ENSG00000076067	0	Euteleostomi	1	Life before LCA of Cellular_organisms - Cellular organisms	4	Eutheria
ENSG00000076108	0	Euteleostomi	2	Cellular organisms - Eukaryota	4	Eutheria
ENSG00000076201	0	Euteleostomi	2	Cellular organisms - Eukaryota	5	Theria
ENSG00000076242	0	Euteleostomi	1	Life before LCA of Cellular_organisms - Cellular organisms	15	Cellular_Organisms
ENSG00000076248	0	Euteleostomi	1	Life before LCA of Cellular_organisms - Cellular organisms	14	Eukaryota
ENSG00000076258	1	Tetrapoda	1	Life before LCA of Cellular_organisms - Cellular organisms	7	Amniota
ENSG00000076321	0	Euteleostomi	1	Life before LCA of Cellular_organisms - Cellular organisms	12	Bilateria
ENSG00000076344	0	Euteleostomi	2	Cellular organisms - Eukaryota	12	Bilateria
ENSG00000076351	0	Euteleostomi	1	Life before LCA of Cellular_organisms - Cellular organisms	12	Bilateria
ENSG00000076356	0	Euteleostomi	1	Life before LCA of Cellular_organisms - Cellular organisms	12	Bilateria
ENSG00000076382	2	Amniota	1	Life before LCA of Cellular_organisms - Cellular organisms	6	Mammalia
ENSG00000076513	0	Euteleostomi	1	Life before LCA of Cellular_organisms - Cellular organisms	12	Bilateria
ENSG00000076554	0	Euteleostomi	6	Metazoa - Eumetazoa	9	Euteleostomi
ENSG00000076555	0	Euteleostomi	1	Life before LCA of Cellular_organisms - Cellular organisms	14	Eukaryota
ENSG00000076604	0	Euteleostomi	2	Cellular organisms - Eukaryota	12	Bilateria
ENSG00000076641	0	Euteleostomi	11	Olfactores - Craniata	9	Euteleostomi
ENSG00000076650	0	Euteleostomi	2	Cellular organisms - Eukaryota	13	Opisthokonta
ENSG00000076662	3	Mammalia	9	Deuterostomia - Chordata	2	Catarrhini
ENSG00000076685	0	Euteleostomi	1	Life before LCA of Cellular_organisms - Cellular organisms	12	Bilateria
ENSG00000076706	0	Euteleostomi	6	Metazoa - Eumetazoa	9	Euteleostomi
ENSG00000076716	0	Euteleostomi	6	Metazoa - Eumetazoa	12	Bilateria
ENSG00000076770	0	Euteleostomi	2	Cellular organisms - Eukaryota	11	Deuterostomia
ENSG00000076826	0	Euteleostomi	2	Cellular organisms - Eukaryota	9	Euteleostomi
ENSG00000076864	0	Euteleostomi	2	Cellular organisms - Eukaryota	10	Chordata
ENSG00000076924	0	Euteleostomi	1	Life before LCA of Cellular_organisms - Cellular organisms	5	Theria
ENSG00000076928	0	Euteleostomi	2	Cellular organisms - Eukaryota	4	Eutheria
ENSG00000076944	0	Euteleostomi	2	Cellular organisms - Eukaryota	14	Eukaryota
ENSG00000076984	0	Euteleostomi	1	Life before LCA of Cellular_organisms - Cellular organisms	12	Bilateria
ENSG00000077009	0	Euteleostomi	1	Life before LCA of Cellular_organisms - Cellular organisms	9	Euteleostomi
ENSG00000077044	0	Euteleostomi	1	Life before LCA of Cellular_organisms - Cellular organisms	12	Bilateria
ENSG00000077063	0	Euteleostomi	1	Life before LCA of Cellular_organisms - Cellular organisms	9	Euteleostomi
ENSG00000077080	3	Mammalia	2	Cellular organisms - Eukaryota	13	Opisthokonta
ENSG00000077092	0	Euteleostomi	5	Holozoa - Metazoa	11	Deuterostomia
ENSG00000077097	0	Euteleostomi	1	Life before LCA of Cellular_organisms - Cellular organisms	14	Eukaryota
ENSG00000077147	0	Euteleostomi	2	Cellular organisms - Eukaryota	12	Bilateria
ENSG00000077150	0	Euteleostomi	1	Life before LCA of Cellular_organisms - Cellular organisms	9	Euteleostomi
ENSG00000077152	0	Euteleostomi	2	Cellular organisms - Eukaryota	9	Euteleostomi
ENSG00000077157	1	Tetrapoda	1	Life before LCA of Cellular_organisms - Cellular organisms	11	Deuterostomia
ENSG00000077232	0	Euteleostomi	1	Life before LCA of Cellular_organisms - Cellular organisms	11	Deuterostomia
ENSG00000077235	0	Euteleostomi	6	Metazoa - Eumetazoa	11	Deuterostomia
ENSG00000077238	3	Mammalia	12	Craniata - Euteleostomi	7	Amniota
ENSG00000077254	0	Euteleostomi	1	Life before LCA of Cellular_organisms - Cellular organisms	11	Deuterostomia
ENSG00000077264	0	Euteleostomi	1	Life before LCA of Cellular_organisms - Cellular organisms	13	Opisthokonta
ENSG00000077274	0	Euteleostomi	1	Life before LCA of Cellular_organisms - Cellular organisms	11	Deuterostomia
ENSG00000077279	0	Euteleostomi	2	Cellular organisms - Eukaryota	8	Tetrapoda
ENSG00000077312	0	Euteleostomi	2	Cellular organisms - Eukaryota	9	Euteleostomi
ENSG00000077327	0	Euteleostomi	1	Life before LCA of Cellular_organisms - Cellular organisms	11	Deuterostomia
ENSG00000077348			1	Life before LCA of Cellular_organisms - Cellular organisms	5	Theria
ENSG00000077380	0	Euteleostomi	1	Life before LCA of Cellular_organisms - Cellular organisms	13	Opisthokonta
ENSG00000077420	0	Euteleostomi	3	Eukaryota - Opisthokonta	0	HUMAN
ENSG00000077454	0	Euteleostomi	1	Life before LCA of Cellular_organisms - Cellular organisms	5	Theria
ENSG00000077458	0	Euteleostomi	2	Cellular organisms - Eukaryota	12	Bilateria
ENSG00000077463	0	Euteleostomi	1	Life before LCA of Cellular_organisms - Cellular organisms	12	Bilateria
ENSG00000077498	0	Euteleostomi	1	Life before LCA of Cellular_organisms - Cellular organisms	10	Chordata
ENSG00000077514	0	Euteleostomi	2	Cellular organisms - Eukaryota	9	Euteleostomi
ENSG00000077522	0	Euteleostomi	1	Life before LCA of Cellular_organisms - Cellular organisms	13	Opisthokonta
ENSG00000077549	0	Euteleostomi	2	Cellular organisms - Eukaryota	14	Eukaryota
ENSG00000077585	0	Euteleostomi	2	Cellular organisms - Eukaryota	11	Deuterostomia
ENSG00000077616	0	Euteleostomi	1	Life before LCA of Cellular_organisms - Cellular organisms	13	Opisthokonta
ENSG00000077684	0	Euteleostomi	2	Cellular organisms - Eukaryota	12	Bilateria
ENSG00000077713	0	Euteleostomi	1	Life before LCA of Cellular_organisms - Cellular organisms	9	Euteleostomi
ENSG00000077721	0	Euteleostomi	2	Cellular organisms - Eukaryota	14	Eukaryota
ENSG00000077782	0	Euteleostomi	1	Life before LCA of Cellular_organisms - Cellular organisms	12	Bilateria
ENSG00000077800	0	Euteleostomi	1	Life before LCA of Cellular_organisms - Cellular organisms	10	Chordata
ENSG00000077809	1	Tetrapoda	7	Eumetazoa - Bilateria	8	Tetrapoda
ENSG00000077935	1	Tetrapoda	1	Life before LCA of Cellular_organisms - Cellular organisms	14	Eukaryota
ENSG00000077942	0	Euteleostomi	1	Life before LCA of Cellular_organisms - Cellular organisms	9	Euteleostomi
ENSG00000077943	0	Euteleostomi	1	Life before LCA of Cellular_organisms - Cellular organisms	12	Bilateria
ENSG00000077984	1	Tetrapoda	7	Eumetazoa - Bilateria	9	Euteleostomi
ENSG00000078018	0	Euteleostomi	1	Life before LCA of Cellular_organisms - Cellular organisms	9	Euteleostomi
ENSG00000078043	0	Euteleostomi	2	Cellular organisms - Eukaryota	9	Euteleostomi
ENSG00000078053	0	Euteleostomi	1	Life before LCA of Cellular_organisms - Cellular organisms	7	Amniota
ENSG00000078061	3	Mammalia	1	Life before LCA of Cellular_organisms - Cellular organisms	12	Bilateria
ENSG00000078070	0	Euteleostomi	1	Life before LCA of Cellular_organisms - Cellular organisms	15	Cellular_Organisms
ENSG00000078081	3	Mammalia	7	Eumetazoa - Bilateria	7	Amniota
ENSG00000078098	0	Euteleostomi	1	Life before LCA of Cellular_organisms - Cellular organisms	13	Opisthokonta
ENSG00000078114	1	Tetrapoda	1	Life before LCA of Cellular_organisms - Cellular organisms	10	Chordata
ENSG00000078124	0	Euteleostomi	1	Life before LCA of Cellular_organisms - Cellular organisms	8	Tetrapoda
ENSG00000078140	0	Euteleostomi	2	Cellular organisms - Eukaryota	13	Opisthokonta
ENSG00000078142	0	Euteleostomi	2	Cellular organisms - Eukaryota	14	Eukaryota
ENSG00000078177	0	Euteleostomi	1	Life before LCA of Cellular_organisms - Cellular organisms	9	Euteleostomi
ENSG00000078237	1	Tetrapoda	1	Life before LCA of Cellular_organisms - Cellular organisms	15	Cellular_Organisms
ENSG00000078246	1	Tetrapoda	2	Cellular organisms - Eukaryota	8	Tetrapoda
ENSG00000078269	1	Tetrapoda	2	Cellular organisms - Eukaryota	9	Euteleostomi
ENSG00000078295	2	Amniota	1	Life before LCA of Cellular_organisms - Cellular organisms	12	Bilateria
ENSG00000078304	0	Euteleostomi	2	Cellular organisms - Eukaryota	13	Opisthokonta
ENSG00000078328	0	Euteleostomi	1	Life before LCA of Cellular_organisms - Cellular organisms	10	Chordata
ENSG00000078369	0	Euteleostomi	1	Life before LCA of Cellular_organisms - Cellular organisms	13	Opisthokonta
ENSG00000078399	0	Euteleostomi	2	Cellular organisms - Eukaryota	7	Amniota
ENSG00000078401	0	Euteleostomi	11	Olfactores - Craniata	8	Tetrapoda
ENSG00000078403	0	Euteleostomi	2	Cellular organisms - Eukaryota	8	Tetrapoda
ENSG00000078487	3	Mammalia	2	Cellular organisms - Eukaryota	4	Eutheria
ENSG00000078549	0	Euteleostomi	2	Cellular organisms - Eukaryota	9	Euteleostomi
ENSG00000078579	0	Euteleostomi	6	Metazoa - Eumetazoa	9	Euteleostomi
ENSG00000078589	0	Euteleostomi	6	Metazoa - Eumetazoa	9	Euteleostomi
ENSG00000078596	1	Tetrapoda	7	Eumetazoa - Bilateria	8	Tetrapoda
ENSG00000078618	0	Euteleostomi	1	Life before LCA of Cellular_organisms - Cellular organisms	14	Eukaryota
ENSG00000078668	1	Tetrapoda	2	Cellular organisms - Eukaryota	9	Euteleostomi
ENSG00000078674	0	Euteleostomi	2	Cellular organisms - Eukaryota	9	Euteleostomi
ENSG00000078687	0	Euteleostomi	2	Cellular organisms - Eukaryota	11	Deuterostomia
ENSG00000078699	0	Euteleostomi	3	Eukaryota - Opisthokonta	9	Euteleostomi
ENSG00000078725	0	Euteleostomi	9	Deuterostomia - Chordata	9	Euteleostomi
ENSG00000078747	0	Euteleostomi	2	Cellular organisms - Eukaryota	12	Bilateria
ENSG00000078795	2	Amniota	2	Cellular organisms - Eukaryota	7	Amniota
ENSG00000078804	1	Tetrapoda	6	Metazoa - Eumetazoa	0	HUMAN
ENSG00000078808	0	Euteleostomi	2	Cellular organisms - Eukaryota	12	Bilateria
ENSG00000078814	0	Euteleostomi	1	Life before LCA of Cellular_organisms - Cellular organisms	13	Opisthokonta
ENSG00000078898	3	Mammalia	6	Metazoa - Eumetazoa	5	Theria
ENSG00000078900	0	Euteleostomi	2	Cellular organisms - Eukaryota	11	Deuterostomia
ENSG00000078902	0	Euteleostomi	2	Cellular organisms - Eukaryota	12	Bilateria
ENSG00000078967	0	Euteleostomi	2	Cellular organisms - Eukaryota	14	Eukaryota
ENSG00000079101	1	Tetrapoda	12	Craniata - Euteleostomi	7	Amniota
ENSG00000079102	0	Euteleostomi	2	Cellular organisms - Eukaryota	9	Euteleostomi
ENSG00000079112	1	Tetrapoda	1	Life before LCA of Cellular_organisms - Cellular organisms	9	Euteleostomi
ENSG00000079134	0	Euteleostomi	2	Cellular organisms - Eukaryota	13	Opisthokonta
ENSG00000079150	0	Euteleostomi	1	Life before LCA of Cellular_organisms - Cellular organisms	9	Euteleostomi
ENSG00000079156	0	Euteleostomi	2	Cellular organisms - Eukaryota	9	Euteleostomi
ENSG00000079215	0	Euteleostomi	1	Life before LCA of Cellular_organisms - Cellular organisms	10	Chordata
ENSG00000079246	0	Euteleostomi	2	Cellular organisms - Eukaryota	14	Eukaryota
ENSG00000079257	0	Euteleostomi	11	Olfactores - Craniata	7	Amniota
ENSG00000079263	5	Eutheria	2	Cellular organisms - Eukaryota	5	Theria
ENSG00000079277	0	Euteleostomi	1	Life before LCA of Cellular_organisms - Cellular organisms	12	Bilateria
ENSG00000079308	0	Euteleostomi	2	Cellular organisms - Eukaryota	12	Bilateria
ENSG00000079313	0	Euteleostomi	2	Cellular organisms - Eukaryota	12	Bilateria
ENSG00000079332	0	Euteleostomi	1	Life before LCA of Cellular_organisms - Cellular organisms	14	Eukaryota
ENSG00000079335	1	Tetrapoda	1	Life before LCA of Cellular_organisms - Cellular organisms	13	Opisthokonta
ENSG00000079337	0	Euteleostomi	1	Life before LCA of Cellular_organisms - Cellular organisms	12	Bilateria
ENSG00000079385	3	Mammalia	1	Life before LCA of Cellular_organisms - Cellular organisms	7	Amniota
ENSG00000079387	0	Euteleostomi	2	Cellular organisms - Eukaryota	14	Eukaryota
ENSG00000079393	0	Euteleostomi	1	Life before LCA of Cellular_organisms - Cellular organisms	9	Euteleostomi
ENSG00000079432	0	Euteleostomi	1	Life before LCA of Cellular_organisms - Cellular organisms	4	Eutheria
ENSG00000079435	0	Euteleostomi	1	Life before LCA of Cellular_organisms - Cellular organisms	5	Theria
ENSG00000079459	0	Euteleostomi	1	Life before LCA of Cellular_organisms - Cellular organisms	14	Eukaryota
ENSG00000079462	0	Euteleostomi	1	Life before LCA of Cellular_organisms - Cellular organisms	5	Theria
ENSG00000079482	1	Tetrapoda	2	Cellular organisms - Eukaryota	12	Bilateria
ENSG00000079557	3	Mammalia	7	Eumetazoa - Bilateria	6	Mammalia
ENSG00000079616	0	Euteleostomi	1	Life before LCA of Cellular_organisms - Cellular organisms	6	Mammalia
ENSG00000079689	0	Euteleostomi	1	Life before LCA of Cellular_organisms - Cellular organisms	10	Chordata
ENSG00000079691	0	Euteleostomi	1	Life before LCA of Cellular_organisms - Cellular organisms	12	Bilateria
ENSG00000079739	0	Euteleostomi	1	Life before LCA of Cellular_organisms - Cellular organisms	14	Eukaryota
ENSG00000079785	0	Euteleostomi	1	Life before LCA of Cellular_organisms - Cellular organisms	12	Bilateria
ENSG00000079805	0	Euteleostomi	2	Cellular organisms - Eukaryota	12	Bilateria
ENSG00000079819	0	Euteleostomi	2	Cellular organisms - Eukaryota	9	Euteleostomi
ENSG00000079841	0	Euteleostomi	4	Opisthokonta - Holozoa	12	Bilateria
ENSG00000079931	1	Tetrapoda	1	Life before LCA of Cellular_organisms - Cellular organisms	10	Chordata
ENSG00000079950	0	Euteleostomi	2	Cellular organisms - Eukaryota	9	Euteleostomi
ENSG00000079974	0	Euteleostomi	1	Life before LCA of Cellular_organisms - Cellular organisms	11	Deuterostomia
ENSG00000079999	0	Euteleostomi	1	Life before LCA of Cellular_organisms - Cellular organisms	11	Deuterostomia
ENSG00000080007	0	Euteleostomi	1	Life before LCA of Cellular_organisms - Cellular organisms	12	Bilateria
ENSG00000080031	0	Euteleostomi	1	Life before LCA of Cellular_organisms - Cellular organisms	5	Theria
ENSG00000080166	0	Euteleostomi	1	Life before LCA of Cellular_organisms - Cellular organisms	10	Chordata
ENSG00000080189	0	Euteleostomi	2	Cellular organisms - Eukaryota	8	Tetrapoda
ENSG00000080200	1	Tetrapoda	1	Life before LCA of Cellular_organisms - Cellular organisms	7	Amniota
ENSG00000080224	1	Tetrapoda	1	Life before LCA of Cellular_organisms - Cellular organisms	12	Bilateria
ENSG00000080293	1	Tetrapoda	6	Metazoa - Eumetazoa	5	Theria
ENSG00000080298	0	Euteleostomi	3	Eukaryota - Opisthokonta	13	Opisthokonta
ENSG00000080345	0	Euteleostomi	1	Life before LCA of Cellular_organisms - Cellular organisms	9	Euteleostomi
ENSG00000080371	0	Euteleostomi	1	Life before LCA of Cellular_organisms - Cellular organisms	12	Bilateria
ENSG00000080493	0	Euteleostomi	1	Life before LCA of Cellular_organisms - Cellular organisms	12	Bilateria
ENSG00000080503	0	Euteleostomi	1	Life before LCA of Cellular_organisms - Cellular organisms	13	Opisthokonta
ENSG00000080511	0	Euteleostomi	1	Life before LCA of Cellular_organisms - Cellular organisms	11	Deuterostomia
ENSG00000080546	0	Euteleostomi	2	Cellular organisms - Eukaryota	11	Deuterostomia
ENSG00000080561	0	Euteleostomi	1	Life before LCA of Cellular_organisms - Cellular organisms	10	Chordata
ENSG00000080572			2	Cellular organisms - Eukaryota	11	Deuterostomia
ENSG00000080573	0	Euteleostomi	1	Life before LCA of Cellular_organisms - Cellular organisms	11	Deuterostomia
ENSG00000080603	0	Euteleostomi	1	Life before LCA of Cellular_organisms - Cellular organisms	14	Eukaryota
ENSG00000080608	0	Euteleostomi	2	Cellular organisms - Eukaryota	14	Eukaryota
ENSG00000080618	0	Euteleostomi	1	Life before LCA of Cellular_organisms - Cellular organisms	9	Euteleostomi
ENSG00000080644	0	Euteleostomi	1	Life before LCA of Cellular_organisms - Cellular organisms	12	Bilateria
ENSG00000080709	0	Euteleostomi	1	Life before LCA of Cellular_organisms - Cellular organisms	12	Bilateria
ENSG00000080802	0	Euteleostomi	2	Cellular organisms - Eukaryota	10	Chordata
ENSG00000080815	0	Euteleostomi	2	Cellular organisms - Eukaryota	14	Eukaryota
ENSG00000080819	0	Euteleostomi	1	Life before LCA of Cellular_organisms - Cellular organisms	14	Eukaryota
ENSG00000080822	0	Euteleostomi	7	Eumetazoa - Bilateria	9	Euteleostomi
ENSG00000080823	0	Euteleostomi	1	Life before LCA of Cellular_organisms - Cellular organisms	11	Deuterostomia
ENSG00000080824	0	Euteleostomi	1	Life before LCA of Cellular_organisms - Cellular organisms	14	Eukaryota
ENSG00000080839	0	Euteleostomi	2	Cellular organisms - Eukaryota	12	Bilateria
ENSG00000080845	0	Euteleostomi	6	Metazoa - Eumetazoa	9	Euteleostomi
ENSG00000080854	0	Euteleostomi	8	Bilateria - Deuterostomia	12	Bilateria
ENSG00000080910			5	Holozoa - Metazoa	3	Euarchontoglires
ENSG00000080986	1	Tetrapoda	1	Life before LCA of Cellular_organisms - Cellular organisms	13	Opisthokonta
ENSG00000081014	0	Euteleostomi	2	Cellular organisms - Eukaryota	10	Chordata
ENSG00000081019	0	Euteleostomi	5	Holozoa - Metazoa	12	Bilateria
ENSG00000081026	0	Euteleostomi	1	Life before LCA of Cellular_organisms - Cellular organisms	12	Bilateria
ENSG00000081041	5	Eutheria	11	Olfactores - Craniata	6	Mammalia
ENSG00000081051	4	Theria	7	Eumetazoa - Bilateria	5	Theria
ENSG00000081052	2	Amniota	1	Life before LCA of Cellular_organisms - Cellular organisms	0	HUMAN
ENSG00000081059	0	Euteleostomi	2	Cellular organisms - Eukaryota	0	HUMAN
ENSG00000081087	0	Euteleostomi	6	Metazoa - Eumetazoa	12	Bilateria
ENSG00000081138	0	Euteleostomi	1	Life before LCA of Cellular_organisms - Cellular organisms	10	Chordata
ENSG00000081148	0	Euteleostomi	7	Eumetazoa - Bilateria	9	Euteleostomi
ENSG00000081154	0	Euteleostomi	4	Opisthokonta - Holozoa	9	Euteleostomi
ENSG00000081177	0	Euteleostomi	1	Life before LCA of Cellular_organisms - Cellular organisms	11	Deuterostomia
ENSG00000081181	0	Euteleostomi	1	Life before LCA of Cellular_organisms - Cellular organisms	14	Eukaryota
ENSG00000081189	0	Euteleostomi	2	Cellular organisms - Eukaryota	9	Euteleostomi
ENSG00000081237	0	Euteleostomi	1	Life before LCA of Cellular_organisms - Cellular organisms	9	Euteleostomi
ENSG00000081248	0	Euteleostomi	1	Life before LCA of Cellular_organisms - Cellular organisms	12	Bilateria
ENSG00000081277	0	Euteleostomi	2	Cellular organisms - Eukaryota	9	Euteleostomi
ENSG00000081307	0	Euteleostomi	1	Life before LCA of Cellular_organisms - Cellular organisms	14	Eukaryota
ENSG00000081320	0	Euteleostomi	1	Life before LCA of Cellular_organisms - Cellular organisms	5	Theria
ENSG00000081377	0	Euteleostomi	1	Life before LCA of Cellular_organisms - Cellular organisms	13	Opisthokonta
ENSG00000081386	5	Eutheria	2	Cellular organisms - Eukaryota	1	Homininae
ENSG00000081479	0	Euteleostomi	1	Life before LCA of Cellular_organisms - Cellular organisms	12	Bilateria
ENSG00000081665	9	Catarrhini	1	Life before LCA of Cellular_organisms - Cellular organisms	12	Bilateria
ENSG00000081692	0	Euteleostomi	1	Life before LCA of Cellular_organisms - Cellular organisms	12	Bilateria
ENSG00000081721	0	Euteleostomi	1	Life before LCA of Cellular_organisms - Cellular organisms	14	Eukaryota
ENSG00000081760	0	Euteleostomi	1	Life before LCA of Cellular_organisms - Cellular organisms	11	Deuterostomia
ENSG00000081791	2	Amniota	1	Life before LCA of Cellular_organisms - Cellular organisms	7	Amniota
ENSG00000081800	1	Tetrapoda	1	Life before LCA of Cellular_organisms - Cellular organisms	9	Euteleostomi
ENSG00000081803	0	Euteleostomi	1	Life before LCA of Cellular_organisms - Cellular organisms	11	Deuterostomia
ENSG00000081818	0	Euteleostomi	1	Life before LCA of Cellular_organisms - Cellular organisms	10	Chordata
ENSG00000081842	0	Euteleostomi	1	Life before LCA of Cellular_organisms - Cellular organisms	10	Chordata
ENSG00000081853	0	Euteleostomi	1	Life before LCA of Cellular_organisms - Cellular organisms	10	Chordata
ENSG00000081870	3	Mammalia	2	Cellular organisms - Eukaryota	9	Euteleostomi
ENSG00000081913	0	Euteleostomi	1	Life before LCA of Cellular_organisms - Cellular organisms	8	Tetrapoda
ENSG00000081923	0	Euteleostomi	1	Life before LCA of Cellular_organisms - Cellular organisms	14	Eukaryota
ENSG00000081985	1	Tetrapoda	6	Metazoa - Eumetazoa	9	Euteleostomi
ENSG00000082014	0	Euteleostomi	2	Cellular organisms - Eukaryota	14	Eukaryota
ENSG00000082068	0	Euteleostomi	1	Life before LCA of Cellular_organisms - Cellular organisms	14	Eukaryota
ENSG00000082074	1	Tetrapoda	1	Life before LCA of Cellular_organisms - Cellular organisms	8	Tetrapoda
ENSG00000082126	0	Euteleostomi	1	Life before LCA of Cellular_organisms - Cellular organisms	7	Amniota
ENSG00000082146	0	Euteleostomi	1	Life before LCA of Cellular_organisms - Cellular organisms	8	Tetrapoda
ENSG00000082153	0	Euteleostomi	2	Cellular organisms - Eukaryota	9	Euteleostomi
ENSG00000082175	0	Euteleostomi	5	Holozoa - Metazoa	9	Euteleostomi
ENSG00000082196	0	Euteleostomi	1	Life before LCA of Cellular_organisms - Cellular organisms	0	HUMAN
ENSG00000082212	0	Euteleostomi	1	Life before LCA of Cellular_organisms - Cellular organisms	15	Cellular_Organisms
ENSG00000082213	0	Euteleostomi	4	Opisthokonta - Holozoa	11	Deuterostomia
ENSG00000082258	0	Euteleostomi	2	Cellular organisms - Eukaryota	10	Chordata
ENSG00000082269	0	Euteleostomi	1	Life before LCA of Cellular_organisms - Cellular organisms	12	Bilateria
ENSG00000082293	0	Euteleostomi	1	Life before LCA of Cellular_organisms - Cellular organisms	10	Chordata
ENSG00000082397	0	Euteleostomi	2	Cellular organisms - Eukaryota	12	Bilateria
ENSG00000082438	0	Euteleostomi	1	Life before LCA of Cellular_organisms - Cellular organisms	7	Amniota
ENSG00000082458	0	Euteleostomi	1	Life before LCA of Cellular_organisms - Cellular organisms	12	Bilateria
ENSG00000082482	0	Euteleostomi	1	Life before LCA of Cellular_organisms - Cellular organisms	9	Euteleostomi
ENSG00000082497	1	Tetrapoda	7	Eumetazoa - Bilateria	8	Tetrapoda
ENSG00000082512	1	Tetrapoda	1	Life before LCA of Cellular_organisms - Cellular organisms	8	Tetrapoda
ENSG00000082515	0	Euteleostomi	1	Life before LCA of Cellular_organisms - Cellular organisms	12	Bilateria
ENSG00000082516	0	Euteleostomi	1	Life before LCA of Cellular_organisms - Cellular organisms	11	Deuterostomia
ENSG00000082556	1	Tetrapoda	6	Metazoa - Eumetazoa	10	Chordata
ENSG00000082641	0	Euteleostomi	5	Holozoa - Metazoa	10	Chordata
ENSG00000082684	0	Euteleostomi	1	Life before LCA of Cellular_organisms - Cellular organisms	9	Euteleostomi
ENSG00000082701	0	Euteleostomi	1	Life before LCA of Cellular_organisms - Cellular organisms	14	Eukaryota
ENSG00000082781	0	Euteleostomi	1	Life before LCA of Cellular_organisms - Cellular organisms	12	Bilateria
ENSG00000082805	0	Euteleostomi	1	Life before LCA of Cellular_organisms - Cellular organisms	10	Chordata
ENSG00000082898	0	Euteleostomi	2	Cellular organisms - Eukaryota	14	Eukaryota
ENSG00000082929	5	Eutheria	19	Euarchontoglires - Primates	1	Homininae
ENSG00000082996	0	Euteleostomi	1	Life before LCA of Cellular_organisms - Cellular organisms	12	Bilateria
ENSG00000083067	0	Euteleostomi	4	Opisthokonta - Holozoa	12	Bilateria
ENSG00000083093	1	Tetrapoda	2	Cellular organisms - Eukaryota	7	Amniota
ENSG00000083097	0	Euteleostomi	2	Cellular organisms - Eukaryota	13	Opisthokonta
ENSG00000083099	0	Euteleostomi	6	Metazoa - Eumetazoa	8	Tetrapoda
ENSG00000083123	0	Euteleostomi	1	Life before LCA of Cellular_organisms - Cellular organisms	15	Cellular_Organisms
ENSG00000083168	0	Euteleostomi	2	Cellular organisms - Eukaryota	10	Chordata
ENSG00000083223	0	Euteleostomi	2	Cellular organisms - Eukaryota	11	Deuterostomia
ENSG00000083290	0	Euteleostomi	1	Life before LCA of Cellular_organisms - Cellular organisms	12	Bilateria
ENSG00000083307	0	Euteleostomi	3	Eukaryota - Opisthokonta	10	Chordata
ENSG00000083312	0	Euteleostomi	2	Cellular organisms - Eukaryota	14	Eukaryota
ENSG00000083444	0	Euteleostomi	1	Life before LCA of Cellular_organisms - Cellular organisms	12	Bilateria
ENSG00000083454	0	Euteleostomi	2	Cellular organisms - Eukaryota	7	Amniota
ENSG00000083457	0	Euteleostomi	1	Life before LCA of Cellular_organisms - Cellular organisms	6	Mammalia
ENSG00000083520	0	Euteleostomi	1	Life before LCA of Cellular_organisms - Cellular organisms	15	Cellular_Organisms
ENSG00000083535	0	Euteleostomi	1	Life before LCA of Cellular_organisms - Cellular organisms	11	Deuterostomia
ENSG00000083544	0	Euteleostomi	2	Cellular organisms - Eukaryota	9	Euteleostomi
ENSG00000083635	1	Tetrapoda	2	Cellular organisms - Eukaryota	10	Chordata
ENSG00000083642	0	Euteleostomi	2	Cellular organisms - Eukaryota	13	Opisthokonta
ENSG00000083720	0	Euteleostomi	1	Life before LCA of Cellular_organisms - Cellular organisms	12	Bilateria
ENSG00000083750	3	Mammalia	2	Cellular organisms - Eukaryota	14	Eukaryota
ENSG00000083782	0	Euteleostomi	1	Life before LCA of Cellular_organisms - Cellular organisms	9	Euteleostomi
ENSG00000083799	0	Euteleostomi	3	Eukaryota - Opisthokonta	12	Bilateria
ENSG00000083807	3	Mammalia	1	Life before LCA of Cellular_organisms - Cellular organisms	3	Euarchontoglires
ENSG00000083812	5	Eutheria	2	Cellular organisms - Eukaryota	4	Eutheria
ENSG00000083814	5	Eutheria	2	Cellular organisms - Eukaryota	2	Catarrhini
ENSG00000083817	4	Theria	2	Cellular organisms - Eukaryota	2	Catarrhini
ENSG00000083828	4	Theria	3	Eukaryota - Opisthokonta	0	HUMAN
ENSG00000083838	4	Theria	2	Cellular organisms - Eukaryota	2	Catarrhini
ENSG00000083842	4	Theria	2	Cellular organisms - Eukaryota	2	Catarrhini
ENSG00000083844	4	Theria	1	Life before LCA of Cellular_organisms - Cellular organisms	12	Bilateria
ENSG00000083845	0	Euteleostomi	1	Life before LCA of Cellular_organisms - Cellular organisms	15	Cellular_Organisms
ENSG00000083857	0	Euteleostomi	1	Life before LCA of Cellular_organisms - Cellular organisms	12	Bilateria
ENSG00000083896	0	Euteleostomi	2	Cellular organisms - Eukaryota	9	Euteleostomi
ENSG00000083937	0	Euteleostomi	2	Cellular organisms - Eukaryota	11	Deuterostomia
ENSG00000084070	0	Euteleostomi	2	Cellular organisms - Eukaryota	10	Chordata
ENSG00000084072	4	Theria	1	Life before LCA of Cellular_organisms - Cellular organisms	12	Bilateria
ENSG00000084073	0	Euteleostomi	1	Life before LCA of Cellular_organisms - Cellular organisms	14	Eukaryota
ENSG00000084090	0	Euteleostomi	2	Cellular organisms - Eukaryota	12	Bilateria
ENSG00000084092	0	Euteleostomi	1	Life before LCA of Cellular_organisms - Cellular organisms	12	Bilateria
ENSG00000084093	0	Euteleostomi	1	Life before LCA of Cellular_organisms - Cellular organisms	9	Euteleostomi
ENSG00000084110	0	Euteleostomi	1	Life before LCA of Cellular_organisms - Cellular organisms	11	Deuterostomia
ENSG00000084112	0	Euteleostomi	1	Life before LCA of Cellular_organisms - Cellular organisms	9	Euteleostomi
ENSG00000084207	3	Mammalia	1	Life before LCA of Cellular_organisms - Cellular organisms	6	Mammalia
ENSG00000084234	0	Euteleostomi	1	Life before LCA of Cellular_organisms - Cellular organisms	9	Euteleostomi
ENSG00000084444	1	Tetrapoda	6	Metazoa - Eumetazoa	7	Amniota
ENSG00000084453	2	Amniota	4	Opisthokonta - Holozoa	7	Amniota
ENSG00000084463	0	Euteleostomi	5	Holozoa - Metazoa	9	Euteleostomi
ENSG00000084623	0	Euteleostomi	1	Life before LCA of Cellular_organisms - Cellular organisms	14	Eukaryota
ENSG00000084628	0	Euteleostomi	6	Metazoa - Eumetazoa	9	Euteleostomi
ENSG00000084636	0	Euteleostomi	1	Life before LCA of Cellular_organisms - Cellular organisms	7	Amniota
ENSG00000084652	0	Euteleostomi	1	Life before LCA of Cellular_organisms - Cellular organisms	12	Bilateria
ENSG00000084674	0	Euteleostomi	1	Life before LCA of Cellular_organisms - Cellular organisms	9	Euteleostomi
ENSG00000084676	0	Euteleostomi	2	Cellular organisms - Eukaryota	7	Amniota
ENSG00000084693	0	Euteleostomi	1	Life before LCA of Cellular_organisms - Cellular organisms	11	Deuterostomia
ENSG00000084710	0	Euteleostomi	2	Cellular organisms - Eukaryota	12	Bilateria
ENSG00000084731	0	Euteleostomi	2	Cellular organisms - Eukaryota	12	Bilateria
ENSG00000084733	0	Euteleostomi	1	Life before LCA of Cellular_organisms - Cellular organisms	14	Eukaryota
ENSG00000084734			1	Life before LCA of Cellular_organisms - Cellular organisms	5	Theria
ENSG00000084754	0	Euteleostomi	1	Life before LCA of Cellular_organisms - Cellular organisms	12	Bilateria
ENSG00000084764	0	Euteleostomi	2	Cellular organisms - Eukaryota	13	Opisthokonta
ENSG00000084774	0	Euteleostomi	1	Life before LCA of Cellular_organisms - Cellular organisms	15	Cellular_Organisms
ENSG00000085063	4	Theria	6	Metazoa - Eumetazoa	7	Amniota
ENSG00000085117	0	Euteleostomi	5	Holozoa - Metazoa	9	Euteleostomi
ENSG00000085185	0	Euteleostomi	1	Life before LCA of Cellular_organisms - Cellular organisms	8	Tetrapoda
ENSG00000085224	0	Euteleostomi	1	Life before LCA of Cellular_organisms - Cellular organisms	10	Chordata
ENSG00000085231	0	Euteleostomi	1	Life before LCA of Cellular_organisms - Cellular organisms	13	Opisthokonta
ENSG00000085265	5	Eutheria	1	Life before LCA of Cellular_organisms - Cellular organisms	12	Bilateria
ENSG00000085274	0	Euteleostomi	2	Cellular organisms - Eukaryota	9	Euteleostomi
ENSG00000085276	0	Euteleostomi	2	Cellular organisms - Eukaryota	9	Euteleostomi
ENSG00000085365	0	Euteleostomi	2	Cellular organisms - Eukaryota	12	Bilateria
ENSG00000085377	0	Euteleostomi	1	Life before LCA of Cellular_organisms - Cellular organisms	11	Deuterostomia
ENSG00000085382	0	Euteleostomi	1	Life before LCA of Cellular_organisms - Cellular organisms	14	Eukaryota
ENSG00000085415	0	Euteleostomi	1	Life before LCA of Cellular_organisms - Cellular organisms	13	Opisthokonta
ENSG00000085433	0	Euteleostomi	1	Life before LCA of Cellular_organisms - Cellular organisms	10	Chordata
ENSG00000085449	0	Euteleostomi	1	Life before LCA of Cellular_organisms - Cellular organisms	7	Amniota
ENSG00000085465			1	Life before LCA of Cellular_organisms - Cellular organisms	6	Mammalia
ENSG00000085491	2	Amniota	1	Life before LCA of Cellular_organisms - Cellular organisms	14	Eukaryota
ENSG00000085511	0	Euteleostomi	1	Life before LCA of Cellular_organisms - Cellular organisms	13	Opisthokonta
ENSG00000085514	5	Eutheria	16	Mammalia - Eutheria	4	Eutheria
ENSG00000085552	1	Tetrapoda	1	Life before LCA of Cellular_organisms - Cellular organisms	12	Bilateria
ENSG00000085563	0	Euteleostomi	1	Life before LCA of Cellular_organisms - Cellular organisms	15	Cellular_Organisms
ENSG00000085644	1	Tetrapoda	2	Cellular organisms - Eukaryota	3	Euarchontoglires
ENSG00000085662	0	Euteleostomi	1	Life before LCA of Cellular_organisms - Cellular organisms	15	Cellular_Organisms
ENSG00000085719	0	Euteleostomi	2	Cellular organisms - Eukaryota	14	Eukaryota
ENSG00000085721	0	Euteleostomi	2	Cellular organisms - Eukaryota	14	Eukaryota
ENSG00000085733	0	Euteleostomi	1	Life before LCA of Cellular_organisms - Cellular organisms	11	Deuterostomia
ENSG00000085741	0	Euteleostomi	5	Holozoa - Metazoa	9	Euteleostomi
ENSG00000085760	0	Euteleostomi	1	Life before LCA of Cellular_organisms - Cellular organisms	15	Cellular_Organisms
ENSG00000085788	0	Euteleostomi	2	Cellular organisms - Eukaryota	11	Deuterostomia
ENSG00000085831	0	Euteleostomi	1	Life before LCA of Cellular_organisms - Cellular organisms	12	Bilateria
ENSG00000085832	0	Euteleostomi	1	Life before LCA of Cellular_organisms - Cellular organisms	13	Opisthokonta
ENSG00000085840	0	Euteleostomi	1	Life before LCA of Cellular_organisms - Cellular organisms	14	Eukaryota
ENSG00000085871	1	Tetrapoda	1	Life before LCA of Cellular_organisms - Cellular organisms	7	Amniota
ENSG00000085872	0	Euteleostomi	2	Cellular organisms - Eukaryota	12	Bilateria
ENSG00000085978	0	Euteleostomi	1	Life before LCA of Cellular_organisms - Cellular organisms	14	Eukaryota
ENSG00000085982	0	Euteleostomi	2	Cellular organisms - Eukaryota	11	Deuterostomia
ENSG00000085998	0	Euteleostomi	2	Cellular organisms - Eukaryota	11	Deuterostomia
ENSG00000085999	0	Euteleostomi	1	Life before LCA of Cellular_organisms - Cellular organisms	14	Eukaryota
ENSG00000086015	0	Euteleostomi	1	Life before LCA of Cellular_organisms - Cellular organisms	14	Eukaryota
ENSG00000086061	0	Euteleostomi	1	Life before LCA of Cellular_organisms - Cellular organisms	14	Eukaryota
ENSG00000086062	1	Tetrapoda	1	Life before LCA of Cellular_organisms - Cellular organisms	10	Chordata
ENSG00000086065	0	Euteleostomi	2	Cellular organisms - Eukaryota	14	Eukaryota
ENSG00000086102	0	Euteleostomi	2	Cellular organisms - Eukaryota	14	Eukaryota
ENSG00000086159	1	Tetrapoda	1	Life before LCA of Cellular_organisms - Cellular organisms	0	HUMAN
ENSG00000086189	0	Euteleostomi	1	Life before LCA of Cellular_organisms - Cellular organisms	15	Cellular_Organisms
ENSG00000086200	0	Euteleostomi	2	Cellular organisms - Eukaryota	13	Opisthokonta
ENSG00000086205	2	Amniota	1	Life before LCA of Cellular_organisms - Cellular organisms	13	Opisthokonta
ENSG00000086232	0	Euteleostomi	1	Life before LCA of Cellular_organisms - Cellular organisms	10	Chordata
ENSG00000086288	1	Tetrapoda	1	Life before LCA of Cellular_organisms - Cellular organisms	11	Deuterostomia
ENSG00000086289	0	Euteleostomi	4	Opisthokonta - Holozoa	9	Euteleostomi
ENSG00000086300	1	Tetrapoda	2	Cellular organisms - Eukaryota	9	Euteleostomi
ENSG00000086475	0	Euteleostomi	1	Life before LCA of Cellular_organisms - Cellular organisms	14	Eukaryota
ENSG00000086504	0	Euteleostomi	2	Cellular organisms - Eukaryota	12	Bilateria
ENSG00000086506	4	Theria	1	Life before LCA of Cellular_organisms - Cellular organisms	0	HUMAN
ENSG00000086544	0	Euteleostomi	2	Cellular organisms - Eukaryota	9	Euteleostomi
ENSG00000086548			1	Life before LCA of Cellular_organisms - Cellular organisms	1	Homininae
ENSG00000086570	0	Euteleostomi	1	Life before LCA of Cellular_organisms - Cellular organisms	12	Bilateria
ENSG00000086589	0	Euteleostomi	2	Cellular organisms - Eukaryota	14	Eukaryota
ENSG00000086598	0	Euteleostomi	2	Cellular organisms - Eukaryota	14	Eukaryota
ENSG00000086619	0	Euteleostomi	2	Cellular organisms - Eukaryota	14	Eukaryota
ENSG00000086666	0	Euteleostomi	2	Cellular organisms - Eukaryota	8	Tetrapoda
ENSG00000086696	1	Tetrapoda	1	Life before LCA of Cellular_organisms - Cellular organisms	9	Euteleostomi
ENSG00000086712	0	Euteleostomi	1	Life before LCA of Cellular_organisms - Cellular organisms	9	Euteleostomi
ENSG00000086717	0	Euteleostomi	1	Life before LCA of Cellular_organisms - Cellular organisms	12	Bilateria
ENSG00000086730	4	Theria	16	Mammalia - Eutheria	3	Euarchontoglires
ENSG00000086758	0	Euteleostomi	2	Cellular organisms - Eukaryota	14	Eukaryota
ENSG00000086827	0	Euteleostomi	2	Cellular organisms - Eukaryota	12	Bilateria
ENSG00000086848	0	Euteleostomi	2	Cellular organisms - Eukaryota	13	Opisthokonta
ENSG00000086967	0	Euteleostomi	1	Life before LCA of Cellular_organisms - Cellular organisms	10	Chordata
ENSG00000086991	0	Euteleostomi	1	Life before LCA of Cellular_organisms - Cellular organisms	10	Chordata
ENSG00000087008	0	Euteleostomi	1	Life before LCA of Cellular_organisms - Cellular organisms	12	Bilateria
ENSG00000087053	0	Euteleostomi	2	Cellular organisms - Eukaryota	12	Bilateria
ENSG00000087074	3	Mammalia	7	Eumetazoa - Bilateria	4	Eutheria
ENSG00000087076	0	Euteleostomi	1	Life before LCA of Cellular_organisms - Cellular organisms	1	Homininae
ENSG00000087077	0	Euteleostomi	2	Cellular organisms - Eukaryota	6	Mammalia
ENSG00000087085	0	Euteleostomi	1	Life before LCA of Cellular_organisms - Cellular organisms	12	Bilateria
ENSG00000087086	1	Tetrapoda	1	Life before LCA of Cellular_organisms - Cellular organisms	5	Theria
ENSG00000087087	0	Euteleostomi	2	Cellular organisms - Eukaryota	5	Theria
ENSG00000087088	5	Eutheria	1	Life before LCA of Cellular_organisms - Cellular organisms	0	HUMAN
ENSG00000087095	0	Euteleostomi	1	Life before LCA of Cellular_organisms - Cellular organisms	12	Bilateria
ENSG00000087111	0	Euteleostomi	2	Cellular organisms - Eukaryota	13	Opisthokonta
ENSG00000087116	2	Amniota	2	Cellular organisms - Eukaryota	9	Euteleostomi
ENSG00000087128	2	Amniota	1	Life before LCA of Cellular_organisms - Cellular organisms	5	Theria
ENSG00000087152	0	Euteleostomi	2	Cellular organisms - Eukaryota	10	Chordata
ENSG00000087157	0	Euteleostomi	2	Cellular organisms - Eukaryota	14	Eukaryota
ENSG00000087191	0	Euteleostomi	1	Life before LCA of Cellular_organisms - Cellular organisms	14	Eukaryota
ENSG00000087206	1	Tetrapoda	11	Olfactores - Craniata	7	Amniota
ENSG00000087237	2	Amniota	2	Cellular organisms - Eukaryota	2	Catarrhini
ENSG00000087245	0	Euteleostomi	1	Life before LCA of Cellular_organisms - Cellular organisms	10	Chordata
ENSG00000087250	5	Eutheria	16	Mammalia - Eutheria	3	Euarchontoglires
ENSG00000087253	0	Euteleostomi	1	Life before LCA of Cellular_organisms - Cellular organisms	11	Deuterostomia
ENSG00000087258	0	Euteleostomi	2	Cellular organisms - Eukaryota	12	Bilateria
ENSG00000087263	0	Euteleostomi	1	Life before LCA of Cellular_organisms - Cellular organisms	13	Opisthokonta
ENSG00000087266	0	Euteleostomi	3	Eukaryota - Opisthokonta	9	Euteleostomi
ENSG00000087269	0	Euteleostomi	1	Life before LCA of Cellular_organisms - Cellular organisms	13	Opisthokonta
ENSG00000087274	0	Euteleostomi	1	Life before LCA of Cellular_organisms - Cellular organisms	13	Opisthokonta
ENSG00000087299	0	Euteleostomi	1	Life before LCA of Cellular_organisms - Cellular organisms	14	Eukaryota
ENSG00000087301	1	Tetrapoda	2	Cellular organisms - Eukaryota	11	Deuterostomia
ENSG00000087302	0	Euteleostomi	2	Cellular organisms - Eukaryota	12	Bilateria
ENSG00000087303	0	Euteleostomi	1	Life before LCA of Cellular_organisms - Cellular organisms	12	Bilateria
ENSG00000087338	0	Euteleostomi	2	Cellular organisms - Eukaryota	12	Bilateria
ENSG00000087365	0	Euteleostomi	2	Cellular organisms - Eukaryota	14	Eukaryota
ENSG00000087448	0	Euteleostomi	1	Life before LCA of Cellular_organisms - Cellular organisms	5	Theria
ENSG00000087460	0	Euteleostomi	2	Cellular organisms - Eukaryota	12	Bilateria
ENSG00000087470	0	Euteleostomi	2	Cellular organisms - Eukaryota	0	HUMAN
ENSG00000087494	0	Euteleostomi	12	Craniata - Euteleostomi	9	Euteleostomi
ENSG00000087495	0	Euteleostomi	2	Cellular organisms - Eukaryota	9	Euteleostomi
ENSG00000087502	0	Euteleostomi	2	Cellular organisms - Eukaryota	13	Opisthokonta
ENSG00000087510	0	Euteleostomi	5	Holozoa - Metazoa	9	Euteleostomi
ENSG00000087586	0	Euteleostomi	1	Life before LCA of Cellular_organisms - Cellular organisms	15	Cellular_Organisms
ENSG00000087589	0	Euteleostomi	2	Cellular organisms - Eukaryota	9	Euteleostomi
ENSG00000087842	0	Euteleostomi	1	Life before LCA of Cellular_organisms - Cellular organisms	11	Deuterostomia
ENSG00000087884	0	Euteleostomi	1	Life before LCA of Cellular_organisms - Cellular organisms	5	Theria
ENSG00000087903	0	Euteleostomi	3	Eukaryota - Opisthokonta	13	Opisthokonta
ENSG00000087916	0	Euteleostomi	1	Life before LCA of Cellular_organisms - Cellular organisms	11	Deuterostomia
ENSG00000087995	0	Euteleostomi	1	Life before LCA of Cellular_organisms - Cellular organisms	14	Eukaryota
ENSG00000088002	1	Tetrapoda	1	Life before LCA of Cellular_organisms - Cellular organisms	9	Euteleostomi
ENSG00000088035	0	Euteleostomi	2	Cellular organisms - Eukaryota	13	Opisthokonta
ENSG00000088038	0	Euteleostomi	2	Cellular organisms - Eukaryota	5	Theria
ENSG00000088053	5	Eutheria	12	Craniata - Euteleostomi	7	Amniota
ENSG00000088179	0	Euteleostomi	2	Cellular organisms - Eukaryota	12	Bilateria
ENSG00000088205	0	Euteleostomi	1	Life before LCA of Cellular_organisms - Cellular organisms	14	Eukaryota
ENSG00000088247	0	Euteleostomi	2	Cellular organisms - Eukaryota	9	Euteleostomi
ENSG00000088256	0	Euteleostomi	2	Cellular organisms - Eukaryota	12	Bilateria
ENSG00000088280	0	Euteleostomi	1	Life before LCA of Cellular_organisms - Cellular organisms	11	Deuterostomia
ENSG00000088298	0	Euteleostomi	1	Life before LCA of Cellular_organisms - Cellular organisms	12	Bilateria
ENSG00000088305	0	Euteleostomi	1	Life before LCA of Cellular_organisms - Cellular organisms	11	Deuterostomia
ENSG00000088320	2	Amniota	1	Life before LCA of Cellular_organisms - Cellular organisms	5	Theria
ENSG00000088325	0	Euteleostomi	2	Cellular organisms - Eukaryota	11	Deuterostomia
ENSG00000088356	4	Theria	2	Cellular organisms - Eukaryota	9	Euteleostomi
ENSG00000088367	0	Euteleostomi	2	Cellular organisms - Eukaryota	12	Bilateria
ENSG00000088386	0	Euteleostomi	1	Life before LCA of Cellular_organisms - Cellular organisms	14	Eukaryota
ENSG00000088387	0	Euteleostomi	2	Cellular organisms - Eukaryota	12	Bilateria
ENSG00000088448	0	Euteleostomi	1	Life before LCA of Cellular_organisms - Cellular organisms	11	Deuterostomia
ENSG00000088451	1	Tetrapoda	1	Life before LCA of Cellular_organisms - Cellular organisms	9	Euteleostomi
ENSG00000088538	0	Euteleostomi	2	Cellular organisms - Eukaryota	12	Bilateria
ENSG00000088543	0	Euteleostomi	9	Deuterostomia - Chordata	7	Amniota
ENSG00000088682	0	Euteleostomi	1	Life before LCA of Cellular_organisms - Cellular organisms	13	Opisthokonta
ENSG00000088726	3	Mammalia	15	Amniota - Mammalia	5	Theria
ENSG00000088727	0	Euteleostomi	2	Cellular organisms - Eukaryota	11	Deuterostomia
ENSG00000088756	1	Tetrapoda	2	Cellular organisms - Eukaryota	8	Tetrapoda
ENSG00000088766	0	Euteleostomi	1	Life before LCA of Cellular_organisms - Cellular organisms	12	Bilateria
ENSG00000088782	5	Eutheria	16	Mammalia - Eutheria	2	Catarrhini
ENSG00000088808	0	Euteleostomi	1	Life before LCA of Cellular_organisms - Cellular organisms	11	Deuterostomia
ENSG00000088812	0	Euteleostomi	1	Life before LCA of Cellular_organisms - Cellular organisms	12	Bilateria
ENSG00000088826	0	Euteleostomi	1	Life before LCA of Cellular_organisms - Cellular organisms	12	Bilateria
ENSG00000088827	1	Tetrapoda	1	Life before LCA of Cellular_organisms - Cellular organisms	6	Mammalia
ENSG00000088832	0	Euteleostomi	1	Life before LCA of Cellular_organisms - Cellular organisms	14	Eukaryota
ENSG00000088833	0	Euteleostomi	2	Cellular organisms - Eukaryota	14	Eukaryota
ENSG00000088836	0	Euteleostomi	1	Life before LCA of Cellular_organisms - Cellular organisms	11	Deuterostomia
ENSG00000088854	0	Euteleostomi	2	Cellular organisms - Eukaryota	11	Deuterostomia
ENSG00000088876	4	Theria	2	Cellular organisms - Eukaryota	0	HUMAN
ENSG00000088881	3	Mammalia	3	Eukaryota - Opisthokonta	12	Bilateria
ENSG00000088882	0	Euteleostomi	1	Life before LCA of Cellular_organisms - Cellular organisms	9	Euteleostomi
ENSG00000088888	4	Theria	1	Life before LCA of Cellular_organisms - Cellular organisms	4	Eutheria
ENSG00000088899	0	Euteleostomi	2	Cellular organisms - Eukaryota
ENSG00000088926	1	Tetrapoda	1	Life before LCA of Cellular_organisms - Cellular organisms	8	Tetrapoda
ENSG00000088930	0	Euteleostomi	2	Cellular organisms - Eukaryota	14	Eukaryota
ENSG00000088986	1	Tetrapoda	2	Cellular organisms - Eukaryota	14	Eukaryota
ENSG00000088992	1	Tetrapoda	2	Cellular organisms - Eukaryota	7	Amniota
ENSG00000089006	0	Euteleostomi	1	Life before LCA of Cellular_organisms - Cellular organisms	9	Euteleostomi
ENSG00000089009	0	Euteleostomi	2	Cellular organisms - Eukaryota	14	Eukaryota
ENSG00000089012	5	Eutheria	1	Life before LCA of Cellular_organisms - Cellular organisms	0	HUMAN
ENSG00000089022	0	Euteleostomi	1	Life before LCA of Cellular_organisms - Cellular organisms	11	Deuterostomia
ENSG00000089041	1	Tetrapoda	2	Cellular organisms - Eukaryota	7	Amniota
ENSG00000089048	0	Euteleostomi	2	Cellular organisms - Eukaryota	13	Opisthokonta
ENSG00000089050			1	Life before LCA of Cellular_organisms - Cellular organisms	5	Theria
ENSG00000089053	0	Euteleostomi	2	Cellular organisms - Eukaryota	11	Deuterostomia
ENSG00000089057	0	Euteleostomi	1	Life before LCA of Cellular_organisms - Cellular organisms	12	Bilateria
ENSG00000089060	0	Euteleostomi	2	Cellular organisms - Eukaryota	13	Opisthokonta
ENSG00000089063	1	Tetrapoda	2	Cellular organisms - Eukaryota	9	Euteleostomi
ENSG00000089091	0	Euteleostomi	1	Life before LCA of Cellular_organisms - Cellular organisms	9	Euteleostomi
ENSG00000089094	0	Euteleostomi	1	Life before LCA of Cellular_organisms - Cellular organisms	13	Opisthokonta
ENSG00000089101	0	Euteleostomi	2	Cellular organisms - Eukaryota	11	Deuterostomia
ENSG00000089116	0	Euteleostomi	2	Cellular organisms - Eukaryota	9	Euteleostomi
ENSG00000089123	0	Euteleostomi	1	Life before LCA of Cellular_organisms - Cellular organisms	13	Opisthokonta
ENSG00000089127	4	Theria	4	Opisthokonta - Holozoa	5	Theria
ENSG00000089154	0	Euteleostomi	1	Life before LCA of Cellular_organisms - Cellular organisms	14	Eukaryota
ENSG00000089157	0	Euteleostomi	1	Life before LCA of Cellular_organisms - Cellular organisms	15	Cellular_Organisms
ENSG00000089159	0	Euteleostomi	7	Eumetazoa - Bilateria	13	Opisthokonta
ENSG00000089163	0	Euteleostomi	1	Life before LCA of Cellular_organisms - Cellular organisms	12	Bilateria
ENSG00000089169	0	Euteleostomi	2	Cellular organisms - Eukaryota	9	Euteleostomi
ENSG00000089177	0	Euteleostomi	1	Life before LCA of Cellular_organisms - Cellular organisms	0	HUMAN
ENSG00000089195	0	Euteleostomi	2	Cellular organisms - Eukaryota	14	Eukaryota
ENSG00000089199	1	Tetrapoda	13	Euteleostomi - Tetrapoda	7	Amniota
ENSG00000089220	0	Euteleostomi	1	Life before LCA of Cellular_organisms - Cellular organisms	12	Bilateria
ENSG00000089225	0	Euteleostomi	5	Holozoa - Metazoa	9	Euteleostomi
ENSG00000089234	0	Euteleostomi	1	Life before LCA of Cellular_organisms - Cellular organisms	14	Eukaryota
ENSG00000089248	1	Tetrapoda	2	Cellular organisms - Eukaryota	8	Tetrapoda
ENSG00000089250	0	Euteleostomi	1	Life before LCA of Cellular_organisms - Cellular organisms	11	Deuterostomia
ENSG00000089280	0	Euteleostomi	1	Life before LCA of Cellular_organisms - Cellular organisms	0	HUMAN
ENSG00000089289			2	Cellular organisms - Eukaryota	14	Eukaryota
ENSG00000089327	3	Mammalia	11	Olfactores - Craniata	4	Eutheria
ENSG00000089335	8	Simiiformes	2	Cellular organisms - Eukaryota	2	Catarrhini
ENSG00000089351	0	Euteleostomi	2	Cellular organisms - Eukaryota	12	Bilateria
ENSG00000089356	3	Mammalia	11	Olfactores - Craniata	6	Mammalia
ENSG00000089472	0	Euteleostomi	1	Life before LCA of Cellular_organisms - Cellular organisms	11	Deuterostomia
ENSG00000089486	0	Euteleostomi	2	Cellular organisms - Eukaryota	7	Amniota
ENSG00000089505	3	Mammalia	12	Craniata - Euteleostomi	0	HUMAN
ENSG00000089558	0	Euteleostomi	1	Life before LCA of Cellular_organisms - Cellular organisms	9	Euteleostomi
ENSG00000089597	0	Euteleostomi	1	Life before LCA of Cellular_organisms - Cellular organisms	15	Cellular_Organisms
ENSG00000089639	1	Tetrapoda	2	Cellular organisms - Eukaryota	8	Tetrapoda
ENSG00000089682	0	Euteleostomi	1	Life before LCA of Cellular_organisms - Cellular organisms	5	Theria
ENSG00000089685	0	Euteleostomi	3	Eukaryota - Opisthokonta	13	Opisthokonta
ENSG00000089692	3	Mammalia	7	Eumetazoa - Bilateria	7	Amniota
ENSG00000089693	0	Euteleostomi	5	Holozoa - Metazoa	0	HUMAN
ENSG00000089723	0	Euteleostomi	2	Cellular organisms - Eukaryota	6	Mammalia
ENSG00000089737	0	Euteleostomi	1	Life before LCA of Cellular_organisms - Cellular organisms	14	Eukaryota
ENSG00000089775	0	Euteleostomi	6	Metazoa - Eumetazoa	9	Euteleostomi
ENSG00000089818	0	Euteleostomi	2	Cellular organisms - Eukaryota	12	Bilateria
ENSG00000089820	0	Euteleostomi	2	Cellular organisms - Eukaryota	12	Bilateria
ENSG00000089847	0	Euteleostomi	1	Life before LCA of Cellular_organisms - Cellular organisms	7	Amniota
ENSG00000089876	0	Euteleostomi	1	Life before LCA of Cellular_organisms - Cellular organisms	10	Chordata
ENSG00000089902	0	Euteleostomi	1	Life before LCA of Cellular_organisms - Cellular organisms	9	Euteleostomi
ENSG00000089916	0	Euteleostomi	7	Eumetazoa - Bilateria	7	Amniota
ENSG00000090006	0	Euteleostomi	1	Life before LCA of Cellular_organisms - Cellular organisms	9	Euteleostomi
ENSG00000090013	0	Euteleostomi	1	Life before LCA of Cellular_organisms - Cellular organisms	11	Deuterostomia
ENSG00000090020	0	Euteleostomi	1	Life before LCA of Cellular_organisms - Cellular organisms	12	Bilateria
ENSG00000090054	0	Euteleostomi	1	Life before LCA of Cellular_organisms - Cellular organisms	14	Eukaryota
ENSG00000090060	1	Tetrapoda	1	Life before LCA of Cellular_organisms - Cellular organisms	14	Eukaryota
ENSG00000090061	0	Euteleostomi	2	Cellular organisms - Eukaryota	14	Eukaryota
ENSG00000090097	2	Amniota	2	Cellular organisms - Eukaryota	6	Mammalia
ENSG00000090104	0	Euteleostomi	2	Cellular organisms - Eukaryota	8	Tetrapoda
ENSG00000090238	0	Euteleostomi	2	Cellular organisms - Eukaryota	12	Bilateria
ENSG00000090263	0	Euteleostomi	6	Metazoa - Eumetazoa	12	Bilateria
ENSG00000090266	0	Euteleostomi	7	Eumetazoa - Bilateria	9	Euteleostomi
ENSG00000090273	0	Euteleostomi	1	Life before LCA of Cellular_organisms - Cellular organisms	14	Eukaryota
ENSG00000090316	0	Euteleostomi	2	Cellular organisms - Eukaryota	14	Eukaryota
ENSG00000090339	3	Mammalia	7	Eumetazoa - Bilateria	3	Euarchontoglires
ENSG00000090372	0	Euteleostomi	1	Life before LCA of Cellular_organisms - Cellular organisms	13	Opisthokonta
ENSG00000090376	3	Mammalia	1	Life before LCA of Cellular_organisms - Cellular organisms	6	Mammalia
ENSG00000090382	0	Euteleostomi	7	Eumetazoa - Bilateria	8	Tetrapoda
ENSG00000090402	0	Euteleostomi	1	Life before LCA of Cellular_organisms - Cellular organisms	13	Opisthokonta
ENSG00000090432	0	Euteleostomi	2	Cellular organisms - Eukaryota	9	Euteleostomi
ENSG00000090447	0	Euteleostomi	2	Cellular organisms - Eukaryota	11	Deuterostomia
ENSG00000090470	0	Euteleostomi	7	Eumetazoa - Bilateria	5	Theria
ENSG00000090487	0	Euteleostomi	1	Life before LCA of Cellular_organisms - Cellular organisms	11	Deuterostomia
ENSG00000090512	3	Mammalia	11	Olfactores - Craniata	9	Euteleostomi
ENSG00000090520	0	Euteleostomi	1	Life before LCA of Cellular_organisms - Cellular organisms	12	Bilateria
ENSG00000090530	0	Euteleostomi	1	Life before LCA of Cellular_organisms - Cellular organisms	10	Chordata
ENSG00000090534	3	Mammalia	14	Tetrapoda - Amniota	5	Theria
ENSG00000090539	0	Euteleostomi	6	Metazoa - Eumetazoa	11	Deuterostomia
ENSG00000090554			15	Amniota - Mammalia	4	Eutheria
ENSG00000090565	0	Euteleostomi	1	Life before LCA of Cellular_organisms - Cellular organisms	11	Deuterostomia
ENSG00000090581	0	Euteleostomi	2	Cellular organisms - Eukaryota	10	Chordata
ENSG00000090612	5	Eutheria	2	Cellular organisms - Eukaryota	2	Catarrhini
ENSG00000090615	0	Euteleostomi	1	Life before LCA of Cellular_organisms - Cellular organisms	9	Euteleostomi
ENSG00000090621	0	Euteleostomi	1	Life before LCA of Cellular_organisms - Cellular organisms	14	Eukaryota
ENSG00000090659	5	Eutheria	1	Life before LCA of Cellular_organisms - Cellular organisms	3	Euarchontoglires
ENSG00000090661	0	Euteleostomi	2	Cellular organisms - Eukaryota	14	Eukaryota
ENSG00000090674	0	Euteleostomi	2	Cellular organisms - Eukaryota	12	Bilateria
ENSG00000090686	0	Euteleostomi	2	Cellular organisms - Eukaryota	9	Euteleostomi
ENSG00000090776	0	Euteleostomi	6	Metazoa - Eumetazoa	12	Bilateria
ENSG00000090857	0	Euteleostomi	1	Life before LCA of Cellular_organisms - Cellular organisms	12	Bilateria
ENSG00000090861	0	Euteleostomi	1	Life before LCA of Cellular_organisms - Cellular organisms	15	Cellular_Organisms
ENSG00000090863	0	Euteleostomi	1	Life before LCA of Cellular_organisms - Cellular organisms	12	Bilateria
ENSG00000090889	1	Tetrapoda	1	Life before LCA of Cellular_organisms - Cellular organisms	12	Bilateria
ENSG00000090905	0	Euteleostomi	1	Life before LCA of Cellular_organisms - Cellular organisms	11	Deuterostomia
ENSG00000090920	0	Euteleostomi	1	Life before LCA of Cellular_organisms - Cellular organisms	11	Deuterostomia
ENSG00000090924	0	Euteleostomi	1	Life before LCA of Cellular_organisms - Cellular organisms	5	Theria
ENSG00000090932	1	Tetrapoda	1	Life before LCA of Cellular_organisms - Cellular organisms	5	Theria
ENSG00000090971	0	Euteleostomi	13	Euteleostomi - Tetrapoda	4	Eutheria
ENSG00000090975	0	Euteleostomi	1	Life before LCA of Cellular_organisms - Cellular organisms	12	Bilateria
ENSG00000090989	0	Euteleostomi	2	Cellular organisms - Eukaryota	12	Bilateria
ENSG00000091009	0	Euteleostomi	1	Life before LCA of Cellular_organisms - Cellular organisms	10	Chordata
ENSG00000091010	0	Euteleostomi	3	Eukaryota - Opisthokonta	12	Bilateria
ENSG00000091039	0	Euteleostomi	1	Life before LCA of Cellular_organisms - Cellular organisms	13	Opisthokonta
ENSG00000091073	0	Euteleostomi	2	Cellular organisms - Eukaryota
ENSG00000091106			1	Life before LCA of Cellular_organisms - Cellular organisms	0	HUMAN
ENSG00000091127	0	Euteleostomi	1	Life before LCA of Cellular_organisms - Cellular organisms	15	Cellular_Organisms
ENSG00000091128	0	Euteleostomi	1	Life before LCA of Cellular_organisms - Cellular organisms	12	Bilateria
ENSG00000091129	0	Euteleostomi	1	Life before LCA of Cellular_organisms - Cellular organisms	12	Bilateria
ENSG00000091136	0	Euteleostomi	1	Life before LCA of Cellular_organisms - Cellular organisms	12	Bilateria
ENSG00000091137	0	Euteleostomi	1	Life before LCA of Cellular_organisms - Cellular organisms	9	Euteleostomi
ENSG00000091138	0	Euteleostomi	1	Life before LCA of Cellular_organisms - Cellular organisms	9	Euteleostomi
ENSG00000091140	0	Euteleostomi	1	Life before LCA of Cellular_organisms - Cellular organisms	15	Cellular_Organisms
ENSG00000091157	0	Euteleostomi	1	Life before LCA of Cellular_organisms - Cellular organisms	12	Bilateria
ENSG00000091164	0	Euteleostomi	1	Life before LCA of Cellular_organisms - Cellular organisms	13	Opisthokonta
ENSG00000091181	3	Mammalia	12	Craniata - Euteleostomi	7	Amniota
ENSG00000091262	0	Euteleostomi	1	Life before LCA of Cellular_organisms - Cellular organisms	14	Eukaryota
ENSG00000091317			11	Olfactores - Craniata	9	Euteleostomi
ENSG00000091409	0	Euteleostomi	1	Life before LCA of Cellular_organisms - Cellular organisms	12	Bilateria
ENSG00000091428	0	Euteleostomi	1	Life before LCA of Cellular_organisms - Cellular organisms	12	Bilateria
ENSG00000091436	0	Euteleostomi	1	Life before LCA of Cellular_organisms - Cellular organisms
ENSG00000091482	1	Tetrapoda	12	Craniata - Euteleostomi	9	Euteleostomi
ENSG00000091483	0	Euteleostomi	1	Life before LCA of Cellular_organisms - Cellular organisms	15	Cellular_Organisms
ENSG00000091490	1	Tetrapoda	1	Life before LCA of Cellular_organisms - Cellular organisms	9	Euteleostomi
ENSG00000091513	0	Euteleostomi	2	Cellular organisms - Eukaryota	9	Euteleostomi
ENSG00000091527	1	Tetrapoda	6	Metazoa - Eumetazoa	11	Deuterostomia
ENSG00000091536	0	Euteleostomi	1	Life before LCA of Cellular_organisms - Cellular organisms	12	Bilateria
ENSG00000091542	0	Euteleostomi	2	Cellular organisms - Eukaryota	9	Euteleostomi
ENSG00000091583	1	Tetrapoda	4	Opisthokonta - Holozoa	8	Tetrapoda
ENSG00000091592	5	Eutheria	1	Life before LCA of Cellular_organisms - Cellular organisms	4	Eutheria
ENSG00000091622	1	Tetrapoda	1	Life before LCA of Cellular_organisms - Cellular organisms	12	Bilateria
ENSG00000091640	0	Euteleostomi	5	Holozoa - Metazoa	5	Theria
ENSG00000091651	1	Tetrapoda	2	Cellular organisms - Eukaryota	8	Tetrapoda
ENSG00000091656	0	Euteleostomi	2	Cellular organisms - Eukaryota	8	Tetrapoda
ENSG00000091664	0	Euteleostomi	1	Life before LCA of Cellular_organisms - Cellular organisms	12	Bilateria
ENSG00000091704	0	Euteleostomi	1	Life before LCA of Cellular_organisms - Cellular organisms	12	Bilateria
ENSG00000091732	0	Euteleostomi	2	Cellular organisms - Eukaryota	11	Deuterostomia
ENSG00000091831	0	Euteleostomi	5	Holozoa - Metazoa	8	Tetrapoda
ENSG00000091844	1	Tetrapoda	2	Cellular organisms - Eukaryota	9	Euteleostomi
ENSG00000091879	0	Euteleostomi	1	Life before LCA of Cellular_organisms - Cellular organisms	10	Chordata
ENSG00000091947	0	Euteleostomi	6	Metazoa - Eumetazoa	5	Theria
ENSG00000091972	3	Mammalia	7	Eumetazoa - Bilateria	8	Tetrapoda
ENSG00000091986	0	Euteleostomi	11	Olfactores - Craniata	9	Euteleostomi
ENSG00000092009	4	Theria	1	Life before LCA of Cellular_organisms - Cellular organisms	0	HUMAN
ENSG00000092010	0	Euteleostomi	2	Cellular organisms - Eukaryota	5	Theria
ENSG00000092020	0	Euteleostomi	2	Cellular organisms - Eukaryota	11	Deuterostomia
ENSG00000092036	3	Mammalia	2	Cellular organisms - Eukaryota	9	Euteleostomi
ENSG00000092051	1	Tetrapoda	2	Cellular organisms - Eukaryota	5	Theria
ENSG00000092054	1	Tetrapoda	1	Life before LCA of Cellular_organisms - Cellular organisms	13	Opisthokonta
ENSG00000092067	1	Tetrapoda	3	Eukaryota - Opisthokonta	6	Mammalia
ENSG00000092068	0	Euteleostomi	1	Life before LCA of Cellular_organisms - Cellular organisms	9	Euteleostomi
ENSG00000092094	0	Euteleostomi	1	Life before LCA of Cellular_organisms - Cellular organisms	15	Cellular_Organisms
ENSG00000092096	0	Euteleostomi	2	Cellular organisms - Eukaryota	5	Theria
ENSG00000092098	0	Euteleostomi	2	Cellular organisms - Eukaryota	5	Theria
ENSG00000092108	0	Euteleostomi	2	Cellular organisms - Eukaryota	14	Eukaryota
ENSG00000092140	0	Euteleostomi	2	Cellular organisms - Eukaryota	11	Deuterostomia
ENSG00000092148	0	Euteleostomi	1	Life before LCA of Cellular_organisms - Cellular organisms	10	Chordata
ENSG00000092199	1	Tetrapoda	1	Life before LCA of Cellular_organisms - Cellular organisms	9	Euteleostomi
ENSG00000092200			2	Cellular organisms - Eukaryota	5	Theria
ENSG00000092201	0	Euteleostomi	1	Life before LCA of Cellular_organisms - Cellular organisms	14	Eukaryota
ENSG00000092203	0	Euteleostomi	2	Cellular organisms - Eukaryota	5	Theria
ENSG00000092208	1	Tetrapoda	2	Cellular organisms - Eukaryota	12	Bilateria
ENSG00000092295	0	Euteleostomi	2	Cellular organisms - Eukaryota	11	Deuterostomia
[truncated: 18,306 more rows]

## Sheet: Supplemental_Table_S4
Supplemental Table S4. Orthologous Ka/Ks test for protein-coding genes
For Supplemental Table S4-S7, S10, only genes with P<0.05 and q<0.05 are called as significant.
Ensembl ID	Branch	N	S	Ka	Ks	Ka/Ks	P	q
ENSG00000000003	0	549.3	179.7	0.07	0.107	0.629	0.155888	0.00886009
ENSG00000000005	0	651.2	299.8	0	0.035	0.088	0.000216176	1.74473e-05
ENSG00000000419	0	643.9	238.1	0.02	0.044	0.363	0.0310977	0.00190102
ENSG00000000457	0	1538	670	0.02	0.034	0.61	0.0911982	0.00531147
ENSG00000000460	0	1805.4	753.6	0.02	0.052	0.459	0.00125636	9.1022e-05
ENSG00000000938	0	1257.2	329.8	0.01	0.106	0.101	2.20157e-13	5.95267e-14
ENSG00000001036	0	998.2	396.8	0.01	0.062	0.214	1.26908e-05	1.20866e-06
ENSG00000001084	0	1404	507	0	0.053	0.054	3.17612e-11	6.5088e-12
ENSG00000001167	0	685.5	355.5	0	0.029	0.001	5.02117e-06	5.0535e-07
ENSG00000001461	0	911.3	306.7	0.01	0.073	0.157	9.04786e-07	1.00964e-07
ENSG00000001561	0	992.6	366.4	0.01	0.053	0.232	0.000142896	1.18042e-05
ENSG00000001617	0	1776	579	0.01	0.099	0.075	0	0
ENSG00000001626	0	3154.8	1285.2	0.01	0.037	0.21	5.69993e-10	9.90773e-11
ENSG00000001629	0	2352.6	914.4	0	0.033	0.116	1.39071e-09	2.294e-10
ENSG00000001631	0	1651.2	556.8	0	0.053	0.057	2.01128e-12	4.78317e-13
ENSG00000002016	0	944.7	309.3	0.09	0.221	0.427	1.86362e-05	1.73729e-06
ENSG00000002549	0	1087.3	469.7	0.01	0.06	0.109	5.91814e-09	8.90371e-10
ENSG00000002587	0	740.2	180.8	0.01	0.14	0.049	1.4948e-12	3.59824e-13
ENSG00000002726	0	1822.2	484.8	0.03	0.112	0.226	1.48043e-11	3.15508e-12
ENSG00000002745	0	816.7	278.3	0.01	0.049	0.154	0.00010893	9.14102e-06
ENSG00000002746	0	3576	1179	0	0.063	0.059	0	0
ENSG00000002822	0	1718	346	0.01	0.187	0.038	0	0
ENSG00000002834	0	673.1	109.9	0.01	0.086	0.07	1.57322e-05	1.48246e-06
ENSG00000002919	0	565.7	244.3	0	0.057	0.063	5.49995e-06	5.49825e-07
ENSG00000003056	0	573.5	257.5	0	0.061	0.058	1.20392e-06	1.31986e-07
ENSG00000003249	0	379.5	94.5	0.04	0.184	0.207	6.87453e-05	5.91909e-06
ENSG00000003436	0	679.2	232.8	0.03	0.051	0.617	0.24419	0.0135954
ENSG00000003756	0	1719.5	725.5	0	0.041	0.015	3.55271e-14	1.07076e-14
ENSG00000003987	0	1414.7	541.3	0	0.068	0.042	4.10782e-15	1.3849e-15
ENSG00000003989	0	1413.9	560.1	0.07	0.151	0.467	1.45114e-05	1.37434e-06
ENSG00000004059	0	362.6	111.4	0	0.036	0.001	0.00095864	7.0565e-05
ENSG00000004142	0	765.2	335.8	0.01	0.054	0.148	1.71595e-05	1.60721e-06
ENSG00000004455	0	494.9	201.1	0	0.073	0.028	1.52968e-07	1.90317e-08
ENSG00000004478	0	1018.2	358.8	0.01	0.061	0.14	1.1965e-06	1.31212e-07
ENSG00000004487	0	1854.8	773.2	0	0.049	0.078	5.21028e-13	1.33702e-13
ENSG00000004660	0	1172.2	387.8	0.01	0.111	0.048	0	0
ENSG00000004700	0	1459.6	487.4	0	0.05	0.083	1.52146e-09	2.49391e-10
ENSG00000004766	0	2169.5	632.5	0	0.059	0.063	7.66054e-15	2.49403e-15
ENSG00000004799	0	912	321	0.01	0.073	0.121	1.30024e-07	1.63244e-08
ENSG00000004809	0	1193.7	534.3	0.02	0.064	0.331	6.54537e-05	5.651e-06
ENSG00000004838	0	894.8	332.2	0.01	0.059	0.181	1.59894e-05	1.50554e-06
ENSG00000004848	0	1348.7	337.3	0	0.123	0.025	0	0
ENSG00000004864	0	999.2	467.8	0.01	0.067	0.076	7.60455e-11	1.48152e-11
ENSG00000004866	0	1176.2	431.8	0	0.038	0.045	9.29758e-08	1.19168e-08
ENSG00000004897	0	1936.9	535.1	0.03	0.093	0.325	1.40914e-06	1.52833e-07
ENSG00000004948	0	1053.2	410.8	0.02	0.055	0.318	0.000710473	5.31872e-05
ENSG00000004961	0	574.9	229.1	0.01	0.062	0.146	0.000176332	1.43985e-05
ENSG00000004975	0	1624.1	583.9	0.01	0.096	0.052	0	0
ENSG00000005007	0	2494.3	661.7	0	0.141	0.001	0	0
ENSG00000005020	0	776.9	300.1	0.01	0.029	0.274	0.0207028	0.00129119
ENSG00000005022	0	645.3	248.7	0	0.042	0.038	1.22445e-05	1.16858e-06
ENSG00000005059	0	519.8	224.2	0.02	0.047	0.382	0.0504628	0.00301569
ENSG00000005073	0	754.7	175.3	0	0.074	0.001	2.0038e-10	3.71271e-11
ENSG00000005100	0	1592.6	528.4	0.04	0.145	0.253	1.4948e-12	3.59824e-13
ENSG00000005102	0	578.9	183.1	0.01	0.077	0.185	0.000195353	1.58648e-05
ENSG00000005108	0	3335.2	1128.8	0.04	0.114	0.329	4.78506e-14	1.41934e-14
ENSG00000005156	0	2149.5	877.5	0.01	0.056	0.206	2.49793e-10	4.57374e-11
ENSG00000005175	0	1502.7	492.3	0.01	0.034	0.385	0.00861237	0.000564151
ENSG00000005194	0	650.7	282.3	0.01	0.067	0.166	2.61477e-05	2.38577e-06
ENSG00000005238	0	1080.9	533.1	0.01	0.023	0.291	0.00847298	0.000555418
ENSG00000005249	0	914.7	333.3	0.01	0.039	0.141	0.000154805	1.27203e-05
ENSG00000005302	0	1111.8	346.2	0.03	0.094	0.289	3.20215e-05	2.89173e-06
ENSG00000005339	0	4970.2	2241.8	0	0.047	0.066	0	0
ENSG00000005379	0	3901.9	1543.1	0.02	0.065	0.274	2.10942e-15	7.39487e-16
ENSG00000005381	0	1889.3	438.7	0.02	0.126	0.153	2.22045e-16	8.63792e-17
ENSG00000005448	0	687.5	314.5	0.01	0.054	0.166	8.28774e-05	7.05195e-06
ENSG00000005469	0	1330.1	505.9	0.01	0.047	0.294	0.000200582	1.62659e-05
ENSG00000005471	0	2729.2	1074.8	0.02	0.071	0.328	1.81237e-09	2.94631e-10
ENSG00000005483	0	4067.5	1503.5	0.01	0.028	0.193	4.22539e-10	7.47448e-11
ENSG00000005700	0	3179	859	0.04	0.092	0.424	7.88287e-07	8.85322e-08
ENSG00000005810	0	10293.2	3626.8	0.01	0.059	0.116	0	0
ENSG00000005812	0	935.3	348.7	0	0.039	0.027	2.65951e-07	3.20527e-08
ENSG00000005884	0	2440.9	751.1	0.01	0.091	0.079	0	0
ENSG00000005889	0	1808.6	597.4	0	0.043	0.013	1.00697e-13	2.84922e-14
ENSG00000005893	0	923.4	309.6	0.01	0.041	0.327	0.00913463	0.00059585
ENSG00000005955	0	1248.4	326.6	0.04	0.131	0.294	4.92655e-06	4.96511e-07
ENSG00000005961	0	2292.8	824.2	0.01	0.077	0.157	2.22045e-16	8.63792e-17
ENSG00000005981	0	981	297	0.03	0.117	0.29	1.42071e-05	1.3471e-06
ENSG00000006007	0	705.5	287.5	0	0.063	0.069	2.68181e-07	3.22991e-08
ENSG00000006016	0	965.4	183.6	0.01	0.151	0.043	4.10782e-15	1.3849e-15
ENSG00000006025	0	1987.5	532.5	0.04	0.157	0.224	1.22124e-15	4.41251e-16
ENSG00000006042	0	433.1	178.9	0	0.057	0.001	1.16235e-06	1.27754e-07
ENSG00000006071	0	3723.8	1019.2	0.01	0.133	0.1	0	0
ENSG00000006114	0	2788.2	1153.8	0.02	0.048	0.337	4.9186e-07	5.71469e-08
ENSG00000006116	0	705.2	239.8	0	0.044	0.001	2.10237e-07	2.57276e-08
ENSG00000006282	0	1822.2	583.8	0.01	0.095	0.077	0	0
ENSG00000006283	0	5678.7	1440.3	0.04	0.165	0.247	0	0
ENSG00000006377	0	612.3	143.7	0	0.023	0.211	0.0754941	0.00443646
ENSG00000006432	0	2461	893	0.01	0.081	0.062	0	0
ENSG00000006451	0	464.2	153.8	0	0.056	0.001	4.87471e-06	4.9183e-07
ENSG00000006453	0	940.5	379.5	0.01	0.089	0.121	5.74711e-10	9.98222e-11
ENSG00000006459	0	2040.1	782.9	0.01	0.037	0.28	2.59777e-05	2.37085e-06
ENSG00000006530	0	899.4	366.6	0.01	0.049	0.14	1.05779e-05	1.01671e-06
ENSG00000006555	0	1422.2	281.8	0.01	0.193	0.059	0	0
ENSG00000006576	0	1642.9	565.1	0.01	0.056	0.206	1.88275e-07	2.31916e-08
ENSG00000006607	0	2289.4	872.6	0.01	0.086	0.17	0	0
ENSG00000006611	0	2063.4	624.6	0.06	0.189	0.305	1.12577e-13	3.16329e-14
ENSG00000006625	0	450.4	113.6	0.01	0.069	0.097	0.000643261	4.84385e-05
ENSG00000006638	0	910	245	0.04	0.156	0.229	2.23809e-08	3.11624e-09
ENSG00000006652	0	995.4	357.6	0	0.067	0.06	3.69321e-10	6.59859e-11
ENSG00000006695	0	947.1	381.9	0.03	0.058	0.43	0.00715747	0.000473433
ENSG00000006704	0	2258.5	669.5	0.01	0.13	0.052	0	0
ENSG00000006712	0	774.2	212.8	0	0.04	0.001	1.64099e-06	1.76382e-07
ENSG00000006715	0	1788	717	0	0.042	0.055	1.11017e-11	2.40528e-12
ENSG00000006740	0	1781.9	672.1	0.01	0.078	0.073	0	0
ENSG00000006744	0	1809.9	662.1	0.04	0.097	0.424	6.7898e-06	6.69969e-07
ENSG00000006831	0	833.9	324.1	0.01	0.059	0.101	1.03593e-06	1.1467e-07
ENSG00000007001	0	666.8	284.2	0.02	0.076	0.238	0.000135222	1.12095e-05
ENSG00000007062	0	1905.4	689.6	0.02	0.071	0.328	6.84101e-07	7.75104e-08
ENSG00000007080	0	428.7	84.3	0	0.117	0.039	1.31556e-06	1.43236e-07
ENSG00000007168	0	858	372	0	0.046	0.076	8.3211e-07	9.3239e-08
ENSG00000007202	0	4570.2	2134.8	0	0.048	0.1	0	0
ENSG00000007237	0	1139.3	285.7	0.02	0.12	0.171	3.96852e-09	6.15041e-10
ENSG00000007264	0	594.4	149.6	0.01	0.151	0.08	1.15819e-09	1.93404e-10
ENSG00000007341	0	1234.1	490.9	0.01	0.039	0.341	0.00249321	0.000174221
ENSG00000007372	0	950.8	357.2	0	0.018	0.001	7.91487e-05	6.7512e-06
ENSG00000007384	0	562.9	151.1	0	0.124	0.015	2.78626e-11	5.74533e-12
ENSG00000007392	0	847.1	247.9	0.08	0.203	0.374	7.57706e-05	6.48197e-06
ENSG00000007402	0	2709.6	728.4	0.01	0.082	0.088	0	0
ENSG00000007520	0	734.1	201.9	0.02	0.176	0.12	1.06556e-11	2.31481e-12
ENSG00000007545	0	2352.1	845.9	0.01	0.116	0.107	0	0
ENSG00000007866	0	883.8	220.2	0.06	0.215	0.291	3.44619e-07	4.08253e-08
ENSG00000007908	0	1331.5	498.5	0.02	0.085	0.208	7.42921e-09	1.10138e-09
ENSG00000007923	0	1121.5	459.5	0	0.043	0.043	5.14182e-09	7.82112e-10
ENSG00000007944	0	1008.9	326.1	0.01	0.071	0.118	1.02547e-07	1.30587e-08
ENSG00000007952	0	1169.9	522.1	0.02	0.034	0.72	0.310533	0.0171272
ENSG00000007968	0	1030.4	280.6	0.02	0.091	0.217	2.11992e-06	2.24784e-07
ENSG00000008018	0	493.6	229.4	0.01	0.075	0.167	7.83024e-05	6.68369e-06
ENSG00000008056	0	1524	585	0	0.055	0.049	7.80487e-14	2.24313e-14
ENSG00000008083	0	2306.6	762.4	0	0.072	0.036	0	0
ENSG00000008086	0	2039.3	759.7	0	0.052	0.066	8.99281e-15	2.90704e-15
ENSG00000008118	0	702.5	212.5	0	0.114	0.013	3.42726e-13	9.03271e-14
ENSG00000008130	0	1353.3	410.7	0.03	0.164	0.203	2.75335e-14	8.42702e-15
ENSG00000008196	0	1055.8	324.2	0	0.051	0.019	5.56754e-10	9.68454e-11
ENSG00000008197	0	996.1	359.9	0	0.043	0.023	1.62867e-08	2.30773e-09
ENSG00000008226	0	3840.3	1331.7	0.03	0.095	0.338	1.67644e-14	5.27006e-15
ENSG00000008256	0	982.7	214.3	0	0.11	0.029	3.46823e-12	8.01937e-13
ENSG00000008277	0	1736.8	591.2	0.01	0.06	0.132	2.40624e-10	4.4136e-11
ENSG00000008283	0	595.5	157.5	0.02	0.218	0.073	1.01474e-13	2.86566e-14
ENSG00000008294	0	2623.9	994.1	0	0.043	0.027	0	0
ENSG00000008300	0	7177.3	2743.7	0.01	0.08	0.136	0	0
ENSG00000008394	0	332.2	132.8	0.03	0.025	1.319	0.669041	0.0356959
ENSG00000008405	0	1236.6	521.4	0	0.047	0.052	3.47184e-10	6.23662e-11
ENSG00000008441	0	1173	330	0.01	0.031	0.195	0.00118185	8.59304e-05
ENSG00000008513	0	836.1	183.9	0.01	0.151	0.049	2.68674e-14	8.23003e-15
ENSG00000008853	0	1633.1	463.9	0.01	0.083	0.06	1.11022e-16	4.43952e-17
ENSG00000008869	0	1824.5	725.5	0	0.055	0.081	3.60823e-14	1.08481e-14
ENSG00000008952	0	861.4	335.6	0	0.037	0.094	4.68312e-05	4.13109e-06
ENSG00000008988	0	261.9	95.1	0.04	0.204	0.181	8.81697e-05	7.48223e-06
ENSG00000009307	0	1815.3	716.7	0	0.022	0.001	1.31998e-09	2.18424e-10
ENSG00000009335	0	2424.6	782.4	0.06	0.159	0.406	2.37674e-09	3.80037e-10
ENSG00000009413	0	7272.9	2099.1	0.02	0.08	0.288	0	0
ENSG00000009694	0	5800.9	2374.1	0	0.053	0.067	0	0
ENSG00000009709	0	1255	305	0.01	0.107	0.076	2.66453e-14	8.16887e-15
ENSG00000009724	0	1464.6	593.4	0.02	0.067	0.328	1.04134e-05	1.00274e-06
ENSG00000009765	0	604	275	0.02	0.077	0.322	0.00191888	0.000135973
ENSG00000009830	0	1602.7	647.3	0.01	0.064	0.184	9.67461e-10	1.6346e-10
ENSG00000009844	0	660.2	260.8	0	0.058	0.079	3.2981e-06	3.40615e-07
ENSG00000009950	0	740.9	156.1	0.06	0.175	0.32	0.000115387	9.65618e-06
ENSG00000009954	0	3208.9	1240.1	0	0.048	0.099	0	0
ENSG00000010017	0	1310.7	528.3	0	0.034	0.044	2.28577e-08	3.17718e-09
ENSG00000010072	0	1070	385	0.02	0.075	0.231	5.15864e-06	5.18133e-07
ENSG00000010165	0	1491.3	605.7	0.01	0.064	0.152	3.62433e-10	6.48504e-11
ENSG00000010219	0	993.9	296.1	0.08	0.145	0.537	0.00818592	0.000537566
ENSG00000010244	0	1030.7	394.3	0.01	0.076	0.163	1.75211e-07	2.16627e-08
ENSG00000010256	0	1023.9	416.1	0.01	0.067	0.136	2.84309e-08	3.91238e-09
ENSG00000010278	0	517.5	166.5	0.01	0.071	0.088	5.45248e-05	4.76659e-06
ENSG00000010282	0	907	347	0.01	0.104	0.087	2.1626e-12	5.12968e-13
ENSG00000010292	0	2893.4	1303.6	0.02	0.048	0.344	1.40265e-07	1.75348e-08
ENSG00000010295	0	1384.7	292.3	0.03	0.15	0.198	1.00632e-10	1.93776e-11
ENSG00000010379	0	1413.2	392.8	0.01	0.128	0.069	0	0
ENSG00000010404	0	1233.7	416.3	0.03	0.076	0.331	7.5984e-05	6.49871e-06
ENSG00000010626	0	814.4	214.6	0.02	0.083	0.229	0.000153178	1.26009e-05
ENSG00000010671	0	1544.5	429.5	0.03	0.127	0.267	2.05181e-08	2.87054e-09
ENSG00000010803	0	1413.4	563.6	0	0.035	0.122	1.06688e-06	1.17846e-07
ENSG00000010810	0	1192.4	418.6	0	0.048	0.053	4.6603e-09	7.13922e-10
ENSG00000010818	0	4802.7	2130.3	0.01	0.059	0.143	0	0
ENSG00000011007	0	1544.9	699.1	0.01	0.049	0.185	6.19572e-08	8.14253e-09
ENSG00000011021	0	2026.9	754.1	0.01	0.062	0.131	1.57541e-13	4.33994e-14
ENSG00000011028	0	3632.2	804.8	0	0.143	0.032	0	0
ENSG00000011052	0	605.3	195.7	0	0.116	0.028	1.31168e-11	2.81682e-12
ENSG00000011105	0	553.6	103.4	0	0.103	0.001	1.26509e-09	2.09675e-10
ENSG00000011143	0	913.4	334.6	0.01	0.075	0.104	9.21103e-09	1.34775e-09
ENSG00000011198	0	758.3	288.7	0	0.053	0.075	2.05237e-06	2.17874e-07
ENSG00000011258	0	1005.7	281.3	0.09	0.167	0.565	0.0137451	0.000876176
ENSG00000011275	0	1995.2	701.8	0.03	0.082	0.329	4.76206e-07	5.5434e-08
ENSG00000011332	0	717.7	146.3	0	0.08	0.001	5.88756e-10	1.02144e-10
ENSG00000011347	0	1021.1	166.9	0.03	0.221	0.123	7.01994e-13	1.77214e-13
ENSG00000011376	0	1930.7	775.3	0.02	0.093	0.268	4.87371e-11	9.7311e-12
ENSG00000011405	0	3879.7	1172.3	0.03	0.086	0.371	5.18858e-10	9.06852e-11
ENSG00000011426	0	2494.2	874.8	0.01	0.05	0.255	3.06466e-08	4.19752e-09
ENSG00000011454	0	2207.8	657.2	0.03	0.078	0.327	2.06303e-06	2.18974e-07
ENSG00000011465	0	734.6	342.4	0.01	0.026	0.426	0.0898182	0.00523485
ENSG00000011478	0	821.6	324.4	0.01	0.094	0.08	3.91711e-11	7.92726e-12
ENSG00000011485	0	1204	293	0	0.12	0.021	0	0
ENSG00000011523	0	1544.6	720.4	0.03	0.067	0.476	0.000693353	5.19588e-05
ENSG00000012061	0	450.4	149.6	0.02	0.116	0.143	1.49114e-05	1.41076e-06
ENSG00000012211	0	1352.2	465.8	0.02	0.104	0.154	1.18261e-12	2.89928e-13
ENSG00000012232	0	1306.7	430.3	0	0.076	0.01	0	0
ENSG00000012504	0	1108.6	349.4	0.01	0.073	0.111	1.38205e-08	1.97668e-09
ENSG00000012660	0	503.5	120.5	0	0.063	0.032	3.82612e-05	3.42263e-06
ENSG00000012779	0	1620	402	0.01	0.113	0.073	0	0
ENSG00000012822	0	1454.2	615.8	0.01	0.061	0.127	9.05201e-11	1.75044e-11
ENSG00000012963	0	916.7	358.3	0.01	0.063	0.141	1.49726e-06	1.62005e-07
ENSG00000012983	0	1838	697	0	0.053	0.061	1.43219e-14	4.54526e-15
ENSG00000013016	0	1308.9	296.1	0.01	0.115	0.096	4.70068e-13	1.21522e-13
ENSG00000013275	0	886	368	0	0.075	0.001	3.66374e-15	1.2461e-15
ENSG00000013288	0	2362.2	652.8	0.05	0.183	0.296	2.22045e-16	8.63792e-17
ENSG00000013293	0	1653.9	659.1	0.01	0.068	0.083	1.33227e-15	4.79232e-16
ENSG00000013297	0	488.8	132.2	0.01	0.069	0.154	0.000707017	5.29447e-05
ENSG00000013306	0	803.4	273.6	0.02	0.117	0.155	5.54621e-09	8.38907e-10
ENSG00000013364	0	1832.4	567.6	0.03	0.16	0.159	0	0
ENSG00000013375	0	1165.1	460.9	0	0.03	0.086	1.07597e-05	1.03282e-06
ENSG00000013503	0	2512.7	886.3	0	0.056	0.001	0	0
ENSG00000013523	0	1451	535	0.08	0.178	0.462	6.24959e-06	6.20183e-07
ENSG00000013561	0	1050.7	371.3	0	0.046	0.083	1.09768e-06	1.21102e-07
ENSG00000013563	0	677.3	228.7	0.02	0.136	0.115	8.73391e-10	1.48425e-10
ENSG00000013810	0	1780.7	664.3	0.09	0.138	0.649	0.00537897	0.000361854
ENSG00000014123	0	1695.5	683.5	0.01	0.047	0.116	4.40602e-10	7.7733e-11
ENSG00000014138	0	1243.6	550.4	0.01	0.112	0.081	0	0
ENSG00000014164	0	2147.8	696.2	0.03	0.121	0.25	1.0103e-14	3.25585e-15
ENSG00000014216	0	1737.8	404.2	0.01	0.176	0.054	0	0
ENSG00000014641	0	647.9	219.1	0	0.05	0.092	8.64079e-05	7.33854e-06
ENSG00000014824	0	1018.9	352.1	0	0.033	0.089	2.8291e-05	2.57233e-06
ENSG00000014914	0	1382.1	645.9	0.01	0.044	0.3	9.19365e-05	7.78742e-06
ENSG00000014919	0	863.1	360.9	0.09	0.16	0.577	0.00835366	0.000548089
ENSG00000015133	0	3083.5	855.5	0.01	0.126	0.108	0	0
ENSG00000015153	0	374.9	165.1	0	0.032	0.085	0.00847119	0.000555351
ENSG00000015171	0	1299.8	401.2	0.01	0.087	0.08	1.669e-12	4.00436e-13
ENSG00000015285	0	993.6	512.4	0.03	0.058	0.486	0.0117906	0.000758066
ENSG00000015413	0	1001.3	231.7	0.03	0.156	0.163	9.72673e-11	1.87744e-11
ENSG00000015520	0	3157.5	913.5	0.02	0.118	0.211	0	0
ENSG00000015532	0	1990.5	604.5	0.01	0.093	0.061	0	0
ENSG00000015676	0	780.6	302.4	0.01	0.072	0.108	2.24286e-07	2.7346e-08
ENSG00000016391	0	1360.6	421.4	0.01	0.094	0.154	3.1072e-11	6.37473e-12
ENSG00000017260	0	2014.2	796.8	0	0.029	0.069	1.57008e-09	2.57074e-10
ENSG00000017373	0	2857.9	691.1	0.01	0.155	0.034	0	0
ENSG00000017427	0	421.7	163.3	0	0.044	0.055	0.000506867	3.87712e-05
ENSG00000017483	0	1074.1	332.9	0.09	0.166	0.57	0.00505301	0.000340774
ENSG00000017797	0	1487.5	474.5	0	0.05	0.068	1.32098e-09	2.1854e-10
ENSG00000018189	0	1412.9	435.1	0.03	0.073	0.432	0.00360537	0.000247086
ENSG00000018280	0	1302	333	0.06	0.166	0.365	1.29901e-06	1.41519e-07
ENSG00000018510	0	1520.4	444.6	0.03	0.107	0.271	1.51457e-07	1.88598e-08
ENSG00000018625	0	2338.1	721.9	0	0.11	0.012	0	0
ENSG00000018699	0	1842.9	686.1	0.01	0.072	0.179	3.07839e-11	6.31918e-12
ENSG00000019144	0	3062.6	1059.4	0.02	0.066	0.254	1.48226e-12	3.57039e-13
ENSG00000019186	0	1192.6	349.4	0.06	0.169	0.337	6.74074e-07	7.64454e-08
ENSG00000019485	0	1040.6	390.4	0.01	0.052	0.171	7.77852e-06	7.60341e-07
ENSG00000019549	0	610.4	193.6	0	0.044	0.001	2.70611e-06	2.83321e-07
ENSG00000019582	0	635.1	156.9	0.02	0.095	0.217	0.000314331	2.47914e-05
ENSG00000019995	0	1587.5	536.5	0	0.058	0.001	0	0
ENSG00000020129	0	1650	537	0	0.051	0.024	5.21805e-15	1.73123e-15
ENSG00000020181	0	3176.2	813.8	0.05	0.212	0.216	0	0
ENSG00000020256	0	1616.3	426.7	0	0.119	0.026	0	0
ENSG00000020426	0	599.3	327.7	0	0.03	0.001	7.03336e-06	6.92412e-07
ENSG00000020577	0	1557.4	593.6	0.01	0.039	0.137	2.83264e-07	3.39868e-08
ENSG00000020922	0	1660.1	454.9	0.01	0.096	0.15	1.05121e-11	2.28501e-12
ENSG00000021355	0	829	308	0.02	0.143	0.13	7.88847e-12	1.74323e-12
ENSG00000021488	0	1085.7	375.3	0.02	0.12	0.199	4.88387e-10	8.57493e-11
ENSG00000021574	0	1332.4	422.6	0.08	0.108	0.696	0.120239	0.00692115
ENSG00000021776	0	3355.9	1099.1	0.02	0.098	0.189	0	0
ENSG00000021826	0	3196.3	1303.7	0.01	0.046	0.117	0	0
ENSG00000021852	0	1226.6	546.4	0.03	0.064	0.395	0.000458264	3.52736e-05
ENSG00000022267	0	694.6	274.4	0	0.007	0.001	0.0247464	0.00153173
ENSG00000022277	0	642.2	275.8	0.01	0.048	0.301	0.00793031	0.000522047
ENSG00000022355	0	951.9	416.1	0	0.065	0.016	4.60854e-13	1.19266e-13
ENSG00000022840	0	1695.7	737.3	0.01	0.031	0.213	2.32383e-05	2.13686e-06
ENSG00000023041	0	923.9	315.1	0.01	0.058	0.093	5.4762e-07	6.31435e-08
ENSG00000023171	0	1697	517	0.01	0.076	0.09	3.91909e-14	1.17296e-14
ENSG00000023228	0	1625	556	0.04	0.097	0.392	3.06295e-05	2.77391e-06
ENSG00000023287	0	3595.2	1186.8	0.01	0.037	0.189	9.99398e-11	1.92546e-11
ENSG00000023318	0	965.8	252.2	0.04	0.082	0.455	0.0317351	0.00193723
ENSG00000023330	0	1356.6	563.4	0	0.049	0.09	1.10702e-09	1.85368e-10
ENSG00000023445	0	1350.2	461.8	0.02	0.064	0.259	7.04462e-06	6.93427e-07
ENSG00000023516	0	4167.1	1394.9	0.02	0.057	0.428	2.4622e-07	2.98114e-08
ENSG00000023697	0	686.6	267.4	0	0.078	0.057	6.13483e-09	9.21454e-10
ENSG00000023734	0	610.5	175.5	0.01	0.063	0.13	0.000175221	1.43094e-05
ENSG00000023839	0	3268.3	1363.7	0.02	0.05	0.442	7.0521e-06	6.9407e-07
ENSG00000023892	0	1529.5	363.5	0	0.07	0.066	4.75042e-12	1.07647e-12
ENSG00000023902	0	915.4	311.6	0.02	0.087	0.237	8.697e-06	8.4537e-07
ENSG00000023909	0	569.2	252.8	0	0.041	0.089	0.000261969	2.09064e-05
ENSG00000024048	0	3988.1	1276.9	0.02	0.075	0.331	1.88736e-11	3.96679e-12
ENSG00000024526	0	1797.7	635.3	0.02	0.031	0.489	0.0244419	0.00151366
ENSG00000024862	0	628.2	187.8	0.04	0.057	0.753	0.520436	0.0280893
ENSG00000025039	0	747.1	305.9	0	0.045	0.06	4.90079e-06	4.94188e-07
ENSG00000025156	0	1046	451	0	0.027	0.036	3.91976e-06	4.00402e-07
ENSG00000025293	0	1860	636	0	0.041	0.093	3.03671e-09	4.7865e-10
ENSG00000025434	0	982.1	415.9	0.01	0.065	0.207	3.28402e-06	3.39304e-07
ENSG00000025708	0	1090.3	355.7	0.02	0.126	0.128	2.37477e-13	6.39022e-14
ENSG00000025770	0	1390.8	421.2	0.03	0.094	0.301	1.83396e-06	1.95817e-07
ENSG00000025772	0	710	214	0.06	0.113	0.549	0.0430472	0.00259054
ENSG00000025796	0	1635.5	644.5	0	0.042	0.001	2.66453e-15	9.23892e-16
ENSG00000025800	0	1167.4	440.6	0	0.036	0.001	9.75189e-10	1.64652e-10
ENSG00000026025	0	1114.5	274.5	0.06	0.16	0.383	5.42298e-05	4.74251e-06
ENSG00000026652	0	908.4	219.6	0.09	0.226	0.383	6.48487e-05	5.60407e-06
ENSG00000027075	0	1227.6	344.4	0.05	0.171	0.298	8.59069e-08	1.10515e-08
ENSG00000027847	0	795.1	185.9	0.02	0.208	0.074	1.22124e-15	4.41251e-16
ENSG00000028203	0	1598	739	0.01	0.019	0.345	0.0115435	0.000742832
ENSG00000028277	0	1018.5	310.5	0.08	0.162	0.484	0.000753688	5.63126e-05
ENSG00000028528	0	1229.1	441.9	0.01	0.06	0.123	2.09717e-08	2.93064e-09
ENSG00000028839	0	259	68	0	0.046	0.001	0.00212594	0.000149731
ENSG00000029153	0	1392	516	0.02	0.043	0.454	0.0102751	0.000665313
ENSG00000029364	0	612.5	308.5	0.01	0.074	0.09	1.28135e-07	1.61174e-08
ENSG00000029534	0	4159.3	1405.7	0.02	0.115	0.146	0	0
ENSG00000029639	0	723.6	311.4	0.03	0.051	0.528	0.0787065	0.00461558
ENSG00000029725	0	1917.3	635.7	0.03	0.125	0.269	5.64728e-11	1.1184e-11
ENSG00000030066	0	2503.4	1030.6	0.01	0.047	0.187	1.7026e-10	3.18046e-11
ENSG00000030304	0	1857.9	749.1	0	0.053	0.082	6.16174e-14	1.7992e-14
ENSG00000030582	0	994.2	328.8	0.03	0.081	0.416	0.0023326	0.000163718
ENSG00000031003	0	2118.1	626.9	0.01	0.058	0.098	8.18345e-13	2.04817e-13
ENSG00000031081	0	3014.9	1203.1	0.04	0.07	0.502	2.72361e-05	2.48045e-06
ENSG00000031698	0	944.2	381.8	0.01	0.058	0.092	5.88031e-08	7.75872e-09
ENSG00000031823	0	1171.2	529.8	0.01	0.06	0.102	4.51522e-10	7.95443e-11
ENSG00000032219	0	3021	747	0.02	0.088	0.22	5.83866e-13	1.48886e-13
ENSG00000032389	0	596.5	132.5	0	0.197	0.009	1.11022e-16	4.43952e-17
ENSG00000032742	0	1826.8	645.2	0.01	0.053	0.104	1.71165e-11	3.61831e-12
ENSG00000033030	0	1561.5	559.5	0.03	0.081	0.362	2.88023e-05	2.61654e-06
ENSG00000033100	0	1580.3	735.7	0	0.061	0.042	0	0
ENSG00000033122	0	3348.3	1262.7	0	0.033	0.1	1.57541e-13	4.33994e-14
ENSG00000033170	0	1198.4	526.6	0	0.049	0.017	3.70992e-12	8.54468e-13
ENSG00000033178	0	2421.8	731.2	0.02	0.091	0.232	2.69806e-12	6.30965e-13
ENSG00000033327	0	1453.3	571.7	0.01	0.056	0.099	6.70148e-11	1.31329e-11
ENSG00000033627	0	1882.8	631.2	0.04	0.101	0.38	1.61225e-06	1.73522e-07
ENSG00000033800	0	1415.6	537.4	0.01	0.052	0.135	1.5765e-08	2.23901e-09
ENSG00000033867	0	2755.1	877.9	0.03	0.083	0.312	1.20151e-09	1.99726e-10
ENSG00000034053	0	1811.4	432.6	0.01	0.187	0.051	0	0
ENSG00000034152	0	844.7	187.3	0.02	0.136	0.156	8.54902e-08	1.09998e-08
ENSG00000034533	0	1461.1	650.9	0.03	0.049	0.513	0.0102624	0.000664727
ENSG00000034677	0	1948.1	565.9	0.03	0.08	0.343	7.82883e-06	7.64747e-07
ENSG00000034693	0	778.3	340.7	0	0.027	0.15	0.00207564	0.000146456
ENSG00000034713	0	234.9	116.1	0	0.009	0.001	0.142968	0.00815751
ENSG00000034971	0	1095.7	374.3	0.01	0.089	0.162	5.38151e-09	8.16022e-10
ENSG00000035115	0	737.6	288.4	0.01	0.099	0.056	1.22045e-11	2.63094e-12
ENSG00000035403	0	1148.6	489.4	0.01	0.054	0.098	5.92724e-09	8.91557e-10
ENSG00000035681	0	2001.9	749.1	0.02	0.06	0.254	1.41409e-07	1.76659e-08
ENSG00000035862	0	265.9	25.1	0	0.15	0.001	8.64162e-05	7.33854e-06
ENSG00000036054	0	1528.9	523.1	0.01	0.037	0.214	6.01075e-05	5.22462e-06
ENSG00000036257	0	1708.7	595.3	0	0.038	0.001	6.79457e-14	1.97138e-14
ENSG00000036448	0	3217.6	1177.4	0.01	0.139	0.101	0	0
ENSG00000036473	0	739.8	322.2	0.01	0.028	0.297	0.0239889	0.00148724
ENSG00000036549	0	2081.5	627.5	0.01	0.045	0.203	3.15534e-07	3.7587e-08
ENSG00000036672	0	1357.6	457.4	0.02	0.066	0.234	1.29657e-06	1.41273e-07
ENSG00000036828	0	2445.7	704.3	0.01	0.102	0.069	0	0
ENSG00000037474	0	1747.3	553.7	0.05	0.168	0.274	2.88924e-12	6.73734e-13
ENSG00000037637	0	1480.9	667.1	0	0.038	0.088	6.15311e-09	9.2363e-10
ENSG00000037749	0	743	343	0.01	0.027	0.201	0.00555881	0.000373231
ENSG00000037757	0	725.8	225.2	0.01	0.127	0.089	1.07263e-10	2.05894e-11
ENSG00000037897	0	580.8	247.2	0.01	0.061	0.113	2.26875e-05	2.08936e-06
ENSG00000037965	0	543	183	0	0.033	0.057	0.00116221	8.45785e-05
ENSG00000038002	0	780.1	257.9	0.11	0.159	0.711	0.136225	0.00778796
ENSG00000038210	0	383.6	174.4	0.01	0.03	0.183	0.031136	0.00190305
ENSG00000038219	0	6679.6	2464.4	0.02	0.06	0.352	3.33067e-16	1.27132e-16
ENSG00000038295	0	2214	825	0.01	0.077	0.065	0	0
ENSG00000038358	0	2550.4	977.6	0.01	0.074	0.083	0	0
ENSG00000038427	0	7394.4	2793.6	0.03	0.053	0.526	4.89216e-08	6.52563e-09
ENSG00000038532	0	2400.9	758.1	0.02	0.115	0.145	0	0
ENSG00000039068	0	1861.1	622.9	0.08	0.163	0.504	1.35936e-05	1.29026e-06
ENSG00000039123	0	2396.5	726.5	0	0.036	0.069	3.24645e-11	6.64133e-12
ENSG00000039139	0	10289.9	3567.1	0.04	0.115	0.348	0	0
ENSG00000039319	0	3552.7	1061.3	0.03	0.07	0.357	3.57153e-09	5.57417e-10
ENSG00000039523	0	2418.4	953.6	0.02	0.079	0.206	3.33067e-15	1.13919e-15
ENSG00000039537	0	2082.1	719.9	0.02	0.056	0.322	5.31682e-06	5.32757e-07
ENSG00000039560	0	2109	807	0.01	0.077	0.1	0	0
ENSG00000039650	0	1230.5	332.5	0.01	0.124	0.114	1.63203e-14	5.1393e-15
ENSG00000039987	0	1195.7	331.3	0.01	0.142	0.042	0	0
ENSG00000040199	0	2699.6	1269.4	0.01	0.045	0.153	8.08242e-14	2.31834e-14
ENSG00000040275	0	1377.2	395.8	0.05	0.126	0.37	4.20639e-05	3.73667e-06
ENSG00000040341	0	1207.8	502.2	0	0.029	0.114	2.07252e-05	1.91905e-06
ENSG00000040487	0	715.6	157.4	0.02	0.157	0.114	1.35431e-09	2.23852e-10
ENSG00000040531	0	912.6	287.4	0.02	0.11	0.145	1.94035e-09	3.13484e-10
ENSG00000040608	0	1050.2	344.8	0.01	0.195	0.04	0	0
ENSG00000040633	0	826.5	382.5	0	0.041	0.059	1.06339e-06	1.17514e-07
ENSG00000040933	0	2103.5	827.5	0	0.063	0.031	0	0
ENSG00000041353	0	452.1	201.9	0	0.042	0.105	0.00128324	9.28867e-05
ENSG00000041515	0	4076.2	1485.8	0.03	0.094	0.295	0	0
ENSG00000041802	0	1427.2	546.8	0.02	0.098	0.22	4.12613e-10	7.31484e-11
ENSG00000041880	0	1284.5	314.5	0.07	0.162	0.418	6.80413e-05	5.86125e-06
ENSG00000041982	0	4031.3	1482.7	0.02	0.085	0.178	0	0
ENSG00000041988	0	553.1	160.9	0.03	0.129	0.206	2.18185e-05	2.01393e-06
ENSG00000042088	0	1220.9	588.1	0.01	0.051	0.28	4.10773e-05	3.65575e-06
ENSG00000042286	0	852.7	266.3	0.01	0.091	0.079	1.18189e-09	1.96957e-10
ENSG00000042317	0	1300.6	496.4	0.03	0.061	0.439	0.00267194	0.00018591
ENSG00000042429	0	1413.4	539.6	0	0.058	0.062	4.86589e-12	1.10024e-12
ENSG00000042493	0	773.5	270.5	0.01	0.07	0.075	7.78167e-08	1.00728e-08
ENSG00000042753	0	303.6	122.4	0	0.052	0.001	0.000114776	9.60948e-06
ENSG00000043039	0	627	210	0.01	0.06	0.191	0.000532175	4.05246e-05
ENSG00000043093	0	603.4	170.6	0	0.026	0.001	0.00070934	5.31078e-05
ENSG00000043143	0	1332.1	353.9	0.02	0.134	0.116	2.88658e-15	9.96626e-16
ENSG00000043355	0	1354.6	235.4	0	0.163	0.001	0	0
ENSG00000043514	0	994.2	406.8	0.02	0.062	0.344	0.000924807	6.82189e-05
ENSG00000044446	0	2606.2	1098.8	0	0.064	0.049	0	0
ENSG00000044459	0	2455.5	799.5	0.02	0.046	0.429	0.000682346	5.11864e-05
ENSG00000044524	0	2096.4	852.6	0.01	0.078	0.069	0	0
ENSG00000044574	0	1370.1	591.9	0	0.048	0.001	2.9976e-15	1.03155e-15
ENSG00000046604	0	2414.3	939.7	0.02	0.079	0.238	6.05183e-13	1.54053e-13
ENSG00000046889	0	3580.8	1237.2	0.01	0.072	0.14	0	0
ENSG00000047056	0	1027.4	454.6	0	0.06	0.05	4.42347e-11	8.88311e-12
ENSG00000047188	0	3288.1	1001.9	0.02	0.073	0.227	9.40359e-14	2.67108e-14
ENSG00000047249	0	1003.1	385.9	0	0.056	0.036	1.00848e-09	1.6984e-10
ENSG00000047315	0	2635.7	886.3	0	0.063	0.001	0	0
ENSG00000047346	0	2220.1	659.9	0.02	0.057	0.34	1.60699e-05	1.51253e-06
ENSG00000047457	0	2303	892	0.01	0.051	0.294	4.24917e-07	4.98128e-08
ENSG00000047578	0	3527.9	1326.1	0.02	0.082	0.289	1.55431e-15	5.54463e-16
ENSG00000047579	0	674.7	213.3	0.03	0.097	0.292	0.000985814	7.24631e-05
ENSG00000047597	0	935.3	396.7	0.01	0.037	0.271	0.00244195	0.000170916
ENSG00000047621	0	1246.9	409.1	0	0.072	0.044	4.01124e-13	1.04549e-13
ENSG00000047648	0	2120.2	801.8	0.01	0.077	0.168	4.996e-15	1.66436e-15
ENSG00000047849	0	1995.6	941.4	0.04	0.07	0.498	0.000206677	1.67398e-05
ENSG00000047932	0	941.1	321.9	0.01	0.083	0.16	3.21434e-07	3.82524e-08
ENSG00000048028	0	2335.2	895.8	0	0.049	0.08	4.77396e-15	1.59768e-15
ENSG00000048052	0	2249.6	948.4	0	0.041	0.022	0	0
ENSG00000048342	0	3178.2	1357.8	0.02	0.06	0.264	1.26388e-12	3.08505e-13
ENSG00000048405	0	1503.2	488.8	0	0.025	0.053	2.11797e-06	2.2461e-07
ENSG00000048540	0	346.3	88.7	0.09	0.205	0.449	0.0662824	0.00391591
ENSG00000048545	0	451.6	139.4	0	0.108	0.021	1.69156e-08	2.39183e-09
ENSG00000048649	0	3212	925	0.01	0.072	0.192	2.94209e-14	8.96711e-15
ENSG00000048740	0	1112.5	360.5	0.08	0.162	0.499	0.000625606	4.71966e-05
ENSG00000048991	0	2050.3	631.7	0.06	0.13	0.476	3.52505e-05	3.16828e-06
ENSG00000049089	0	1288.4	727.6	0.16	0.219	0.721	0.0121776	0.000781501
ENSG00000049167	0	771.5	239.5	0	0.05	0.078	1.0849e-05	1.04084e-06
ENSG00000049192	0	2415.1	935.9	0	0.031	0.053	3.11773e-12	7.24931e-13
ENSG00000049239	0	1893.3	512.7	0.01	0.11	0.114	0	0
ENSG00000049323	0	3547.8	1375.2	0.01	0.073	0.078	0	0
ENSG00000049449	0	498.9	239.1	0	0.063	0.033	2.0294e-06	2.15567e-07
ENSG00000049541	0	759.9	296.1	0.01	0.103	0.066	1.24161e-11	2.6734e-12
ENSG00000049618	0	4931.5	1674.5	0.03	0.1	0.26	0	0
ENSG00000049759	0	2121.1	734.9	0.05	0.116	0.419	7.69037e-07	8.65298e-08
ENSG00000049769	0	1301.1	573.9	0.02	0.066	0.253	6.37516e-07	7.27284e-08
ENSG00000049860	0	1154.7	513.3	0.02	0.045	0.506	0.0255162	0.00157684
ENSG00000050030	0	3262.7	1282.3	0.01	0.041	0.236	1.11653e-09	1.86874e-10
ENSG00000050130	0	718.5	253.5	0.03	0.142	0.193	3.55383e-07	4.20391e-08
ENSG00000050165	0	790.9	259.1	0.01	0.134	0.097	6.29508e-12	1.406e-12
ENSG00000050393	0	777.4	299.6	0.07	0.109	0.611	0.0593023	0.00352005
ENSG00000050405	0	1308.4	554.6	0.02	0.04	0.483	0.0202649	0.00126495
ENSG00000050438	0	2261.9	870.1	0.02	0.067	0.273	1.18904e-08	1.71473e-09
ENSG00000050628	0	966	258	0.08	0.225	0.365	5.05736e-06	5.08613e-07
ENSG00000051009	0	1983	975	0.01	0.036	0.218	3.0027e-07	3.58916e-08
ENSG00000051108	0	798	375	0.01	0.04	0.193	0.000507028	3.87754e-05
ENSG00000051128	0	841.4	241.6	0.01	0.162	0.046	0	0
ENSG00000051180	0	696.6	323.4	0.02	0.057	0.416	0.0147836	0.000938686
ENSG00000051341	0	3936.9	1331.1	0.03	0.052	0.571	0.00083962	6.23379e-05
ENSG00000051382	0	2367.1	842.9	0	0.047	0.075	4.95159e-14	1.46636e-14
ENSG00000052126	0	1995.4	722.6	0.01	0.04	0.142	2.65851e-08	3.66945e-09
ENSG00000052723	0	460.4	172.6	0	0.093	0.024	7.34114e-08	9.54994e-09
ENSG00000052749	0	2965.6	910.4	0.05	0.192	0.258	0	0
ENSG00000052802	0	696.1	182.9	0.01	0.042	0.136	0.00232824	0.000163427
ENSG00000052841	0	2049.2	647.8	0.02	0.067	0.323	1.57246e-05	1.48194e-06
ENSG00000052850	0	961.2	265.8	0	0.119	0.036	5.55111e-16	2.07019e-16
ENSG00000053108	0	1854.9	671.1	0.01	0.082	0.173	3.10973e-13	8.24638e-14
ENSG00000053254	0	1112.6	357.4	0	0.072	0.025	1.75637e-13	4.81125e-14
ENSG00000053328	0	787.7	310.3	0.02	0.085	0.274	6.06389e-05	5.26581e-06
ENSG00000053501	0	603.7	173.3	0.01	0.099	0.103	7.10488e-07	8.03754e-08
ENSG00000053524	0	2310.1	779.9	0.04	0.116	0.305	3.41007e-11	6.9512e-12
ENSG00000053702	0	623.3	216.7	0.03	0.073	0.392	0.0133438	0.000851334
ENSG00000053747	0	7155.3	2840.7	0.03	0.075	0.349	0	0
ENSG00000053770	0	1095.7	374.3	0.01	0.085	0.098	3.44539e-11	7.01732e-12
ENSG00000053900	0	1801.3	622.7	0	0.057	0.06	1.85407e-14	5.79357e-15
ENSG00000053918	0	1597.9	331.1	0.01	0.11	0.082	6.66134e-16	2.46161e-16
ENSG00000054116	0	407.6	132.4	0	0.056	0.001	1.46496e-05	1.38689e-06
ENSG00000054118	0	1987.3	877.7	0	0.028	0.107	3.35756e-08	4.57982e-09
ENSG00000054179	0	1091.2	288.8	0.01	0.165	0.087	0	0
ENSG00000054267	0	2929	890	0.01	0.04	0.147	2.0274e-10	3.75454e-11
ENSG00000054277	0	896.2	309.8	0	0.056	0.021	9.77886e-10	1.65031e-10
ENSG00000054282	0	1555.2	580.8	0.02	0.06	0.331	9.88136e-05	8.33526e-06
ENSG00000054356	0	2136.7	791.3	0.03	0.094	0.297	3.03265e-10	5.48818e-11
ENSG00000054392	0	423.8	125.2	0.11	0.185	0.598	0.0988302	0.00573448
ENSG00000054523	0	4051.8	1414.2	0.02	0.08	0.236	0	0
ENSG00000054598	0	1033.3	121.7	0	0.183	0.027	7.77156e-16	2.85455e-16
ENSG00000054690	0	3107.5	981.5	0.05	0.118	0.422	1.75155e-09	2.85314e-10
ENSG00000054793	0	2305.1	766.9	0	0.088	0.005	0	0
ENSG00000054796	0	892.9	295.1	0.01	0.088	0.131	5.96946e-08	7.86924e-09
ENSG00000054803	0	435.8	167.2	0	0.055	0.043	4.86166e-05	4.27928e-06
ENSG00000054938	0	936.2	356.8	0.01	0.127	0.113	4.26215e-13	1.10812e-13
ENSG00000054965	0	499.9	232.1	0	0.026	0.077	0.00332308	0.000228882
ENSG00000054967	0	740.4	261.6	0.01	0.086	0.16	9.88889e-07	1.09863e-07
ENSG00000054983	0	1480.8	574.2	0.02	0.064	0.239	2.77939e-07	3.33698e-08
ENSG00000055044	0	1187	400	0	0.061	0.028	2.66365e-12	6.23715e-13
ENSG00000055118	0	2902.2	571.8	0.02	0.212	0.1	0	0
ENSG00000055130	0	1770.7	545.3	0.03	0.122	0.261	4.64109e-10	8.16633e-11
ENSG00000055147	0	1095.6	398.4	0.06	0.138	0.433	9.05138e-05	7.67313e-06
ENSG00000055163	0	2888.6	945.4	0	0.087	0.004	0	0
ENSG00000055208	0	1515.2	563.8	0	0.05	0.026	1.28897e-13	3.59012e-14
ENSG00000055483	0	2505.6	863.4	0.04	0.112	0.377	7.56006e-10	1.29473e-10
ENSG00000055609	0	7790.5	2790.5	0.02	0.066	0.304	0	0
ENSG00000055732	0	1160.5	498.5	0.01	0.043	0.248	0.000229804	1.84798e-05
ENSG00000055813	0	1200.8	437.2	0.01	0.051	0.231	2.90664e-05	2.63955e-06
ENSG00000055917	0	2386.2	802.8	0.01	0.039	0.207	4.22285e-07	4.95201e-08
ENSG00000055950	0	591.4	191.6	0.02	0.061	0.311	0.00868956	0.000568909
ENSG00000055955	0	2075.1	714.9	0.03	0.11	0.291	1.39029e-11	2.97339e-12
ENSG00000056050	0	765.6	272.4	0.02	0.035	0.489	0.122216	0.00702777
ENSG00000056097	0	2309.1	888.9	0.01	0.058	0.091	0	0
ENSG00000056291	0	873.6	392.4	0.03	0.046	0.557	0.0956099	0.0055538
ENSG00000056487	0	877.9	256.1	0.07	0.131	0.51	0.00711814	0.000471001
ENSG00000056586	0	2505	1068	0	0.028	0.073	2.86395e-11	5.89888e-12
ENSG00000056661	0	797.6	234.4	0	0.057	0.067	8.38506e-07	9.3898e-08
ENSG00000057019	0	1577.1	609.9	0.01	0.026	0.321	0.00362207	0.000248119
ENSG00000057252	0	1146.4	503.6	0.01	0.036	0.246	0.000516108	3.93822e-05
ENSG00000057468	0	2103.7	701.3	0.01	0.049	0.274	1.62178e-06	1.74445e-07
ENSG00000057608	0	999.4	326.6	0.01	0.142	0.105	2.40807e-13	6.47507e-14
ENSG00000057657	0	1833.9	641.1	0.01	0.059	0.084	5.55112e-14	1.63068e-14
ENSG00000057663	0	638.7	186.3	0	0.047	0.001	1.48256e-06	1.60485e-07
ENSG00000057704	0	803.1	312.9	0	0.061	0.041	7.94411e-09	1.17343e-09
ENSG00000057757	0	414.6	218.4	0	0.024	0.001	0.00105487	7.71975e-05
ENSG00000058056	0	1857.9	731.1	0	0.05	0.043	3.21965e-15	1.10432e-15
ENSG00000058085	0	2473.9	1105.1	0.02	0.043	0.44	0.000185904	1.51345e-05
ENSG00000058091	0	1032.1	374.9	0	0.039	0.025	9.74359e-08	1.24405e-08
ENSG00000058272	0	2313.2	767.8	0	0.036	0.097	3.62042e-10	6.47963e-11
ENSG00000058335	0	3013.3	805.7	0.01	0.133	0.105	0	0
ENSG00000058404	0	1514.1	420.9	0.02	0.136	0.17	3.59712e-14	1.08236e-14
ENSG00000058600	0	1692.9	431.1	0.03	0.15	0.192	4.996e-14	1.47891e-14
ENSG00000058729	0	1236.3	416.7	0.01	0.045	0.33	0.00208575	0.000147113
ENSG00000058799	0	648.6	269.4	0.01	0.032	0.291	0.0253903	0.00156987
ENSG00000058804	0	1107.1	479.9	0.01	0.07	0.198	1.98687e-07	2.44e-08
ENSG00000058866	0	1827.9	545.1	0.02	0.093	0.259	7.71508e-09	1.14144e-09
ENSG00000059377	0	1126.5	475.5	0.02	0.092	0.18	1.03269e-09	1.73718e-10
ENSG00000059378	0	1640	463	0.02	0.117	0.194	7.97762e-12	1.7608e-12
ENSG00000059573	0	1662.8	701.2	0.01	0.055	0.163	2.31913e-09	3.71637e-10
ENSG00000059588	0	3373.6	1489.4	0.02	0.071	0.227	0	0
ENSG00000059691	0	1207.8	463.2	0.02	0.038	0.611	0.130915	0.0075032
ENSG00000059728	0	483.5	179.5	0	0.052	0.04	3.82477e-05	3.42251e-06
ENSG00000059758	0	1138.8	430.2	0	0.048	0.001	1.31728e-12	3.20363e-13
ENSG00000059769	0	825.2	254.8	0.01	0.109	0.136	1.57638e-08	2.23901e-09
ENSG00000060069	0	2223.6	659.4	0.03	0.177	0.144	0	0
ENSG00000060237	0	4898.7	2247.3	0.02	0.065	0.234	0	0
ENSG00000060339	0	2483.2	966.8	0	0.041	0.039	0	0
ENSG00000060491	0	1364.5	366.5	0.02	0.125	0.161	8.30891e-13	2.07815e-13
ENSG00000060566	0	580.6	226.4	0.03	0.122	0.239	1.06037e-05	1.01904e-06
ENSG00000060642	0	996	483	0.01	0.042	0.32	0.00157294	0.000112606
ENSG00000060688	0	795.5	275.5	0.02	0.123	0.18	4.49006e-08	6.02557e-09
ENSG00000060709	0	2162.1	726.9	0.01	0.115	0.108	0	0
ENSG00000060718	0	3971.8	1440.2	0.03	0.081	0.315	5.10703e-15	1.69748e-15
ENSG00000060749	0	2932.9	1009.1	0.01	0.043	0.228	3.17094e-09	4.98516e-10
ENSG00000060762	0	228.4	77.6	0.02	0.069	0.269	0.0745754	0.00438529
ENSG00000060971	0	935.1	336.9	0.01	0.086	0.076	2.19068e-11	4.57273e-12
ENSG00000061273	0	966.9	371.1	0.01	0.045	0.116	3.63247e-06	3.72723e-07
ENSG00000061337	0	1532.9	255.1	0	0.221	0.018	0	0
ENSG00000061455	0	1321.7	385.3	0.07	0.217	0.336	1.23431e-09	2.04758e-10
ENSG00000061492	0	795.3	242.7	0.05	0.105	0.481	0.011938	0.000767276
ENSG00000061676	0	2506.2	895.8	0	0.05	0.001	0	0
ENSG00000061794	0	693	276	0.03	0.069	0.506	0.0444388	0.0026723
ENSG00000061918	0	1379.1	477.9	0	0.059	0.001	1.11022e-16	4.43952e-17
ENSG00000061936	0	1919.9	924.1	0.01	0.066	0.097	0	0
ENSG00000061938	0	2549	700	0.01	0.151	0.091	0	0
ENSG00000061987	0	3830.2	1290.8	0.01	0.067	0.203	0	0
ENSG00000062282	0	917.5	243.5	0.01	0.074	0.199	2.8604e-05	2.59918e-06
ENSG00000062485	0	979.3	418.7	0.01	0.042	0.149	1.96082e-05	1.82278e-06
ENSG00000062524	0	659.8	210.2	0.01	0.097	0.11	1.71087e-07	2.11707e-08
ENSG00000062582	0	379.6	121.4	0.02	0.041	0.468	0.216598	0.0121267
ENSG00000062598	0	1576.2	583.8	0	0.054	0.012	2.22045e-16	8.63792e-17
ENSG00000062650	0	2790.9	761.1	0.02	0.104	0.161	0	0
ENSG00000062716	0	887.8	330.2	0	0.033	0.138	0.000495634	3.79517e-05
ENSG00000062725	0	1342.6	412.4	0	0.039	0.019	4.29242e-09	6.61171e-10
ENSG00000062822	0	2666.4	624.6	0.01	0.166	0.056	0	0
ENSG00000063015	0	2169.3	755.7	0.05	0.15	0.335	6.84342e-13	1.72997e-13
ENSG00000063046	0	1301.6	498.4	0.03	0.067	0.523	0.0105717	0.000683487
ENSG00000063176	0	1426.1	532.9	0.03	0.127	0.268	8.20595e-11	1.59401e-11
ENSG00000063241	0	506.2	156.8	0.02	0.175	0.118	1.38851e-08	1.98515e-09
ENSG00000063244	0	1023.9	260.1	0	0.11	0.018	1.11022e-16	4.43952e-17
ENSG00000063245	0	1221.7	431.3	0.01	0.122	0.041	0	0
ENSG00000063322	0	481.6	181.4	0.02	0.088	0.204	0.000373598	2.91542e-05
ENSG00000063438	0	1629.3	527.7	0.06	0.148	0.432	1.29088e-06	1.40738e-07
ENSG00000063515	0	481.7	130.3	0.06	0.2	0.276	4.21395e-05	3.74162e-06
ENSG00000063601	0	1384.5	448.5	0.03	0.121	0.242	1.25132e-08	1.79993e-09
ENSG00000063761	0	1214.1	354.9	0.01	0.083	0.081	7.14218e-12	1.58502e-12
ENSG00000063854	0	738.3	185.7	0.02	0.196	0.085	2.32037e-14	7.17393e-15
ENSG00000063978	0	406.1	160.9	0.02	0.181	0.112	1.06503e-08	1.54596e-09
ENSG00000064012	0	1162.9	451.1	0.03	0.053	0.597	0.0786546	0.00461328
ENSG00000064042	0	2825.2	1263.8	0.02	0.048	0.457	7.85117e-05	6.69999e-06
ENSG00000064102	0	1647.1	452.9	0.04	0.143	0.289	2.40414e-09	3.84081e-10
ENSG00000064115	0	1159.4	550.6	0.02	0.061	0.254	5.25077e-06	5.26789e-07
ENSG00000064195	0	679.4	181.6	0	0.051	0.001	1.28646e-07	1.61709e-08
ENSG00000064218	0	1070	346	0.02	0.091	0.17	1.04551e-08	1.51944e-09
ENSG00000064300	0	1041.3	239.7	0.01	0.154	0.038	0	0
ENSG00000064309	0	2789.9	1071.1	0.04	0.082	0.517	2.6495e-05	2.41625e-06
ENSG00000064313	0	2668.2	928.8	0	0.049	0.061	0	0
ENSG00000064393	0	2716.6	871.4	0	0.099	0.045	0	0
ENSG00000064419	0	1899.3	869.7	0	0.052	0.001	0	0
ENSG00000064489	0	772.4	310.6	0.02	0.093	0.203	8.98678e-07	1.00313e-07
ENSG00000064490	0	594.3	185.7	0.01	0.144	0.06	1.40361e-11	3.00012e-12
ENSG00000064545	0	1103.7	330.3	0.01	0.189	0.076	0	0
ENSG00000064547	0	811.1	241.9	0.01	0.137	0.047	5.32907e-15	1.76726e-15
ENSG00000064601	0	1124.1	357.9	0.01	0.059	0.107	5.32835e-08	7.06887e-09
ENSG00000064651	0	2558.1	1023.9	0	0.06	0.073	0	0
ENSG00000064652	0	348.8	158.2	0	0.026	0.11	0.0286079	0.00175646
ENSG00000064687	0	4878.1	1559.9	0.02	0.139	0.157	0	0
ENSG00000064692	0	2083.8	964.2	0.01	0.045	0.219	1.49279e-08	2.12591e-09
ENSG00000064703	0	1778.4	693.6	0.02	0.051	0.344	6.12988e-05	5.31742e-06
ENSG00000064726	0	877.3	394.7	0	0.076	0.015	4.36318e-14	1.30107e-14
ENSG00000064835	0	691.6	259.4	0	0.057	0.025	6.23387e-08	8.18677e-09
ENSG00000064933	0	2226.6	512.4	0.09	0.148	0.589	0.00329264	0.000226872
ENSG00000064989	0	975.5	377.5	0	0.042	0.074	1.54767e-06	1.67086e-07
ENSG00000064995	0	419.1	213.9	0.02	0.034	0.506	0.221389	0.012375
ENSG00000064999	0	2497.7	895.3	0.01	0.086	0.095	0	0
ENSG00000065054	0	577.9	178.1	0.02	0.151	0.105	3.59364e-09	5.6063e-10
ENSG00000065057	0	731.3	204.7	0.03	0.117	0.259	2.96493e-05	2.69014e-06
ENSG00000065060	0	2785.3	1156.7	0.01	0.042	0.269	3.62528e-08	4.92294e-09
ENSG00000065135	0	768.8	293.2	0	0.021	0.001	0.000126976	1.05559e-05
ENSG00000065150	0	2339.3	1005.7	0	0.058	0.022	0	0
ENSG00000065154	0	963.2	353.8	0.01	0.064	0.183	4.58694e-06	4.63884e-07
ENSG00000065183	0	2044.8	784.2	0.01	0.058	0.128	4.55858e-13	1.18127e-13
ENSG00000065243	0	2262.6	608.4	0.01	0.06	0.14	1.66213e-11	3.51871e-12
ENSG00000065308	0	811.8	298.2	0	0.041	0.001	3.81373e-08	5.16061e-09
ENSG00000065320	0	1633.7	178.3	0.01	0.17	0.038	0	0
ENSG00000065325	0	1171.7	487.3	0.02	0.066	0.243	1.96237e-06	2.08805e-07
ENSG00000065328	0	1852.2	766.8	0.03	0.117	0.28	2.23843e-12	5.29237e-13
ENSG00000065357	0	1553.4	651.6	0.01	0.055	0.096	1.23739e-11	2.66511e-12
ENSG00000065361	0	2825.5	1200.5	0.01	0.039	0.157	7.83273e-12	1.73144e-12
ENSG00000065427	0	1381.9	493.1	0.02	0.078	0.198	1.27694e-08	1.83316e-09
ENSG00000065457	0	1077.2	428.8	0.03	0.107	0.239	1.94611e-08	2.72947e-09
ENSG00000065485	0	1128.8	428.2	0.01	0.056	0.096	1.48175e-08	2.1106e-09
ENSG00000065491	0	1084.1	370.9	0.05	0.103	0.477	0.00332617	0.000229074
ENSG00000065526	0	7489.4	3493.6	0.01	0.064	0.175	0	0
ENSG00000065548	0	1070.9	207.1	0	0.042	0.022	4.40746e-06	4.46908e-07
ENSG00000065559	0	855.1	341.9	0	0.019	0.001	0.00011108	9.31282e-06
ENSG00000065600	0	767.2	240.8	0.1	0.175	0.581	0.0277961	0.0017095
ENSG00000065609	0	1685.2	738.8	0	0.037	0.065	1.34368e-10	2.5405e-11
ENSG00000065613	0	2667.8	1037.2	0.01	0.047	0.27	4.37794e-08	5.88115e-09
ENSG00000065615	0	1215.9	347.1	0.01	0.038	0.151	0.000103895	8.73653e-06
ENSG00000065618	0	3044.5	1428.5	0.05	0.098	0.507	2.46882e-07	2.98817e-08
ENSG00000065621	0	470.1	174.9	0.02	0.053	0.296	0.0262018	0.00161703
ENSG00000065802	0	714.6	290.4	0	0.115	0.037	3.81917e-14	1.1454e-14
ENSG00000065809	0	655.4	262.6	0.03	0.065	0.404	0.0163162	0.00103098
ENSG00000065882	0	2530.8	973.2	0.01	0.075	0.117	0	0
ENSG00000065911	0	700.4	286.6	0.05	0.128	0.398	0.000418907	3.24645e-05
ENSG00000065923	0	1097.5	504.5	0	0.057	0.016	1.88849e-13	5.15576e-14
ENSG00000065970	0	252.1	80.9	0	0.083	0.001	3.76411e-05	3.37047e-06
ENSG00000065978	0	699.7	251.3	0.13	0.184	0.721	0.133083	0.00762029
ENSG00000066027	0	1028	430	0	0.012	0.083	0.00846305	0.000554917
ENSG00000066032	0	2033.2	825.8	0	0.055	0.001	0	0
ENSG00000066044	0	763.5	214.5	0	0.11	0.001	4.44089e-16	1.67323e-16
ENSG00000066056	0	2490.8	866.2	0.01	0.08	0.087	0	0
ENSG00000066084	0	3354.9	1370.1	0.01	0.059	0.203	1.55431e-15	5.54463e-16
ENSG00000066117	0	1096.7	448.3	0	0.037	0.001	6.14557e-10	1.06368e-10
ENSG00000066135	0	2384.4	798.6	0.02	0.094	0.228	9.59677e-13	2.37666e-13
ENSG00000066136	0	860.6	447.4	0	0.018	0.201	0.0120318	0.000772828
ENSG00000066248	0	1628	496	0.01	0.102	0.143	1.72085e-14	5.39805e-15
ENSG00000066279	0	7796.3	2625.7	0.02	0.051	0.394	5.92637e-13	1.5107e-13
ENSG00000066322	0	605.4	231.6	0.01	0.053	0.158	0.000460169	3.54068e-05
ENSG00000066336	0	363.1	131.9	0	0.097	0.029	1.06142e-06	1.17315e-07
ENSG00000066379	0	258.3	119.7	0.02	0.017	0.927	0.931033	0.0489415
ENSG00000066382	0	572	310	0	0.003	0.001	0.146681	0.00835698
ENSG00000066422	0	2332.3	817.7	0.01	0.059	0.124	1.60982e-14	5.07594e-15
ENSG00000066427	0	828.3	257.7	0.03	0.095	0.3	0.000488878	3.74776e-05
ENSG00000066455	0	1541.6	651.4	0.02	0.048	0.316	7.08413e-05	6.0888e-06
ENSG00000066557	0	1329.2	476.8	0.01	0.049	0.236	2.23464e-05	2.05951e-06
ENSG00000066629	0	1665.4	770.6	0	0.07	0.062	0	0
ENSG00000066651	0	738	261	0.01	0.056	0.098	6.28439e-06	6.23467e-07
ENSG00000066654	0	772.1	286.9	0.01	0.07	0.132	2.44315e-06	2.57191e-07
ENSG00000066777	0	4113.4	1433.6	0	0.039	0.063	0	0
ENSG00000066827	0	1877.6	648.4	0.03	0.106	0.273	2.19406e-10	4.04473e-11
ENSG00000066855	0	641.9	291.1	0.02	0.039	0.58	0.19318	0.0108655
ENSG00000066926	0	910.4	376.6	0.01	0.042	0.217	0.000458293	3.52736e-05
ENSG00000066933	0	4731.9	1850.1	0.01	0.04	0.28	2.0119e-11	4.21763e-12
ENSG00000067057	0	1849.5	490.5	0.03	0.203	0.165	0	0
ENSG00000067064	0	640.3	199.7	0.03	0.128	0.2	3.19602e-06	3.30726e-07
ENSG00000067082	0	618.6	230.4	0	0.049	0.034	2.90739e-06	3.02875e-07
ENSG00000067141	0	3004.8	1249.2	0.01	0.043	0.127	5.21805e-15	1.73123e-15
ENSG00000067167	0	789.2	332.8	0.01	0.076	0.068	1.94828e-09	3.14486e-10
ENSG00000067191	0	1333.6	460.4	0	0.057	0.067	3.99202e-11	8.06545e-12
ENSG00000067208	0	1692.5	686.5	0	0.035	0.084	7.90078e-09	1.16773e-09
ENSG00000067248	0	3139	962	0.01	0.058	0.151	2.88658e-15	9.96626e-16
ENSG00000067334	0	1328.5	429.5	0.01	0.039	0.368	0.00673226	0.000447332
ENSG00000067365	0	838.7	373.3	0.03	0.1	0.291	8.72005e-06	8.47386e-07
ENSG00000067369	0	4246.2	1666.8	0.02	0.052	0.308	1.52498e-11	3.2453e-12
ENSG00000067533	0	323.5	126.5	0.01	0.06	0.209	0.0133127	0.000849423
ENSG00000067596	0	2747	904	0.03	0.113	0.233	1.11022e-16	4.43952e-17
ENSG00000067704	0	2121.7	677.3	0.03	0.1	0.257	6.14713e-11	1.21147e-11
ENSG00000067715	0	918.4	347.6	0	0.047	0.001	7.82021e-10	1.33643e-10
ENSG00000067798	0	5005.5	1897.5	0.01	0.061	0.171	0	0
ENSG00000067836	0	729.1	131.9	0	0.208	0.007	0	0
ENSG00000067840	0	1679.7	351.3	0.01	0.17	0.065	0	0
ENSG00000067900	0	3108	861	0	0.051	0.031	0	0
ENSG00000067955	0	363.2	197.8	0	0.026	0.001	0.00131947	9.53294e-05
ENSG00000067992	0	927.1	284.9	0.06	0.136	0.421	0.00111137	8.11333e-05
ENSG00000068001	0	1026.4	392.6	0.01	0.087	0.103	3.35579e-11	6.84438e-12
ENSG00000068024	0	2560.3	688.7	0.04	0.198	0.177	0	0
ENSG00000068028	0	793.8	226.2	0.01	0.075	0.085	1.29146e-07	1.62282e-08
ENSG00000068078	0	2023.7	400.3	0	0.192	0.021	0	0
ENSG00000068097	0	1970.1	873.9	0.02	0.056	0.286	1.07824e-07	1.3695e-08
ENSG00000068120	0	1241.4	450.6	0.01	0.096	0.129	9.08496e-13	2.25987e-13
ENSG00000068137	0	1784.1	573.9	0.03	0.123	0.229	7.43183e-13	1.86902e-13
ENSG00000068308	0	1226.8	483.2	0	0.037	0.111	1.61163e-06	1.73506e-07
ENSG00000068323	0	1213.1	511.9	0	0.036	0.07	1.11822e-07	1.41781e-08
ENSG00000068354	0	1412.6	651.4	0	0.056	0.065	2.72449e-13	7.27234e-14
ENSG00000068366	0	1571.7	561.3	0	0.045	0.043	1.12317e-11	2.43032e-12
ENSG00000068394	0	681.5	290.5	0.02	0.043	0.386	0.0276142	0.00169917
ENSG00000068400	0	1700.2	438.8	0.07	0.161	0.447	3.36348e-05	3.0303e-06
ENSG00000068438	0	704.4	282.6	0.01	0.045	0.23	0.00188139	0.000133461
ENSG00000068650	0	2598.5	935.5	0.01	0.115	0.087	0	0
ENSG00000068654	0	3854.1	1296.9	0.02	0.108	0.226	0	0
ENSG00000068697	0	474.7	224.3	0	0.068	0.064	4.41025e-06	4.4713e-07
ENSG00000068724	0	2041.2	532.8	0.02	0.128	0.18	1.11022e-16	4.43952e-17
ENSG00000068745	0	991.9	271.1	0.09	0.169	0.54	0.0106601	0.000688838
ENSG00000068793	0	2998.9	754.1	0.03	0.185	0.159	0	0
ENSG00000068796	0	1570.8	487.2	0	0.053	0.024	5.20695e-14	1.53762e-14
ENSG00000068831	0	1484.3	342.7	0.01	0.133	0.043	0	0
ENSG00000068878	0	3877.9	1279.1	0.03	0.099	0.289	3.33067e-16	1.27132e-16
ENSG00000068885	0	1833.2	497.8	0.02	0.113	0.152	3.29736e-14	9.97502e-15
ENSG00000068903	0	886.8	247.2	0.03	0.197	0.148	5.08482e-13	1.30712e-13
ENSG00000068912	0	1079.5	369.5	0.01	0.064	0.088	9.9572e-09	1.44968e-09
ENSG00000068976	0	1928.3	597.7	0	0.087	0.018	0	0
ENSG00000069011	0	831.6	110.4	0.01	0.138	0.053	8.79569e-10	1.4937e-10
ENSG00000069018	0	1944.2	638.8	0	0.081	0.053	0	0
ENSG00000069020	0	4654.8	1717.2	0.05	0.104	0.474	1.36873e-10	2.58388e-11
ENSG00000069122	0	2932.6	1093.4	0.04	0.085	0.452	5.01295e-07	5.81722e-08
ENSG00000069188	0	4523.1	1026.9	0.02	0.17	0.095	0	0
ENSG00000069248	0	2523	918	0.02	0.07	0.23	4.96458e-12	1.12117e-12
ENSG00000069275	0	557.1	171.9	0.01	0.115	0.109	2.54122e-06	2.66976e-07
ENSG00000069329	0	1874.5	504.5	0.06	0.208	0.287	8.36697e-12	1.84228e-12
ENSG00000069345	0	929.1	306.9	0	0.052	0.021	6.0131e-09	9.04099e-10
ENSG00000069424	0	1006.1	238.9	0	0.092	0.001	1.11022e-16	4.43952e-17
ENSG00000069535	0	1081.5	433.5	0.01	0.061	0.14	8.28283e-08	1.06761e-08
ENSG00000069667	0	1081.2	322.8	0.01	0.045	0.206	0.000455189	3.50458e-05
ENSG00000069702	0	1778.8	774.2	0.01	0.067	0.165	5.10569e-12	1.15091e-12
ENSG00000069712	0	2962.7	820.3	0.03	0.05	0.553	0.00594309	0.000397717
ENSG00000069812	0	409.1	109.9	0.02	0.126	0.12	1.34254e-05	1.27545e-06
ENSG00000069869	0	2767.2	973.8	0.01	0.048	0.227	1.16042e-09	1.93732e-10
ENSG00000069943	0	1203.5	458.5	0.03	0.083	0.407	0.000934604	6.88929e-05
ENSG00000069956	0	1627.3	535.7	0	0.043	0.071	1.95301e-09	3.1518e-10
ENSG00000069966	0	905.2	273.8	0.07	0.219	0.326	9.27496e-07	1.03358e-07
ENSG00000069974	0	450.5	212.5	0.01	0.056	0.204	0.00248828	0.000173892
ENSG00000069998	0	950.1	318.9	0.03	0.101	0.272	4.60952e-06	4.66039e-07
ENSG00000070010	0	653.9	267.1	0	0.056	0.027	1.47043e-07	1.83445e-08
ENSG00000070019	0	2315.9	903.1	0.01	0.064	0.173	3.78142e-13	9.90537e-14
ENSG00000070047	0	3681.3	1241.7	0.03	0.172	0.179	0	0
ENSG00000070061	0	2916	1077	0.03	0.066	0.406	6.46615e-07	7.364e-08
ENSG00000070081	0	1028.4	231.6	0.06	0.075	0.765	0.46663	0.0252843
ENSG00000070087	0	319.1	100.9	0.05	0.186	0.284	0.00242639	0.000169876
ENSG00000070159	0	1847.6	891.4	0.01	0.035	0.304	5.80399e-05	5.05573e-06
ENSG00000070182	0	5565.1	1406.9	0.02	0.146	0.122	0	0
ENSG00000070190	0	626	196	0.08	0.222	0.371	0.000151904	1.25031e-05
ENSG00000070193	0	469.5	154.5	0	0.054	0.079	0.00033638	2.64191e-05
ENSG00000070214	0	1290.9	557.1	0	0.03	0.132	1.65464e-05	1.55337e-06
ENSG00000070269	0	667.6	304.4	0.02	0.071	0.353	0.00275683	0.00019156
ENSG00000070366	0	766.5	226.5	0.03	0.132	0.224	2.77004e-06	2.89475e-07
ENSG00000070367	0	1661.1	462.9	0	0.055	0.011	1.5099e-14	4.77531e-15
ENSG00000070371	0	3513.7	1394.3	0.02	0.07	0.305	2.34535e-12	5.53082e-13
ENSG00000070388	0	449.5	60.5	0.02	0.18	0.117	5.616e-05	4.90133e-06
ENSG00000070404	0	583.3	94.7	0.01	0.122	0.085	3.41555e-06	3.51849e-07
ENSG00000070413	0	1204.1	367.9	0.01	0.099	0.094	2.49578e-13	6.69612e-14
ENSG00000070423	0	751.2	181.8	0	0.135	0.03	5.70655e-14	1.67499e-14
ENSG00000070444	0	1264.6	481.4	0.02	0.106	0.146	1.72418e-13	4.7266e-14
ENSG00000070476	0	795.8	377.2	0.01	0.047	0.246	0.000537305	4.08769e-05
ENSG00000070495	0	598.3	208.7	0	0.071	0.024	4.99682e-08	6.65794e-09
ENSG00000070501	0	700.1	304.9	0	0.034	0.084	0.000164865	1.34984e-05
ENSG00000070526	0	1335.3	464.7	0.03	0.08	0.325	1.83016e-05	1.70827e-06
ENSG00000070601	0	3343.8	1390.2	0.02	0.056	0.281	1.05515e-11	2.29287e-12
ENSG00000070610	0	1971.5	656.5	0.04	0.097	0.412	6.19111e-06	6.14797e-07
ENSG00000070614	0	2123.4	522.6	0	0.101	0.009	0	0
ENSG00000070669	0	1189.9	493.1	0.01	0.045	0.292	0.000507164	3.87817e-05
ENSG00000070718	0	930.8	320.2	0.04	0.092	0.415	0.00261859	0.00018251
ENSG00000070729	0	2814.6	923.4	0.04	0.128	0.307	2.88658e-15	9.96626e-16
ENSG00000070748	0	1667.4	570.6	0.02	0.091	0.197	7.49068e-12	1.65934e-12
ENSG00000070761	0	412.5	166.5	0	0.088	0.001	7.52155e-09	1.11461e-09
ENSG00000070770	0	738.6	206.4	0	0.041	0.001	2.48178e-06	2.61069e-07
ENSG00000070778	0	2588.7	933.3	0.01	0.088	0.107	0	0
ENSG00000070785	0	919.3	436.7	0.01	0.045	0.171	2.35253e-05	2.1608e-06
ENSG00000070808	0	957.9	278.1	0	0.044	0.072	4.04804e-06	4.12756e-07
ENSG00000070882	0	1999	662	0.03	0.114	0.22	1.46883e-13	4.06164e-14
ENSG00000070886	0	2516.1	498.9	0	0.175	0.016	0	0
ENSG00000070915	0	2493.8	590.2	0.02	0.166	0.095	0	0
ENSG00000070950	0	1080.8	401.2	0.02	0.04	0.515	0.0630707	0.00373584
ENSG00000070961	0	2727.4	932.6	0	0.035	0.001	0	0
ENSG00000070985	0	2866	629	0.02	0.177	0.125	0	0
ENSG00000071051	0	997.9	142.1	0	0.159	0.006	0	0
ENSG00000071054	0	2673.1	1106.9	0	0.034	0.034	4.44089e-16	1.67323e-16
ENSG00000071073	0	1170.6	434.4	0	0.07	0.037	1.36113e-13	3.78534e-14
ENSG00000071127	0	1415.4	399.6	0.01	0.135	0.049	0	0
ENSG00000071189	0	2164.9	706.1	0	0.043	0.043	7.22755e-14	2.08871e-14
ENSG00000071205	0	1560.3	641.7	0.01	0.061	0.16	8.10095e-10	1.3815e-10
ENSG00000071243	0	671.6	237.4	0	0.05	0.03	2.02286e-06	2.1496e-07
ENSG00000071246	0	864.4	230.6	0.01	0.069	0.102	6.32399e-07	7.21672e-08
ENSG00000071282	0	791.6	264.4	0.01	0.09	0.057	1.70212e-10	3.18037e-11
ENSG00000071462	0	626.3	195.7	0.05	0.167	0.3	8.1685e-05	6.95454e-06
ENSG00000071537	0	1729.1	652.9	0	0.062	0.075	2.64233e-14	8.11441e-15
ENSG00000071539	0	883.7	412.3	0.01	0.105	0.079	1.11022e-13	3.12322e-14
ENSG00000071575	0	737.1	201.9	0.01	0.055	0.103	7.73749e-05	6.61071e-06
ENSG00000071626	0	838.4	382.6	0	0.068	0.018	2.71661e-12	6.34286e-13
ENSG00000071794	0	2393.7	603.3	0.04	0.128	0.345	1.65317e-08	2.34107e-09
ENSG00000071859	0	876.7	140.3	0	0.153	0.015	2.70894e-14	8.29457e-15
ENSG00000071889	0	567.4	143.6	0.02	0.133	0.126	1.20523e-06	1.32103e-07
ENSG00000071909	0	2766.7	1256.3	0.01	0.051	0.238	3.22625e-11	6.60414e-12
ENSG00000071967	0	603.3	254.7	0.03	0.045	0.615	0.246204	0.0137034
ENSG00000072062	0	741.8	206.2	0.01	0.093	0.062	1.15547e-08	1.6706e-09
ENSG00000072071	0	3663.8	758.2	0.01	0.157	0.067	0	0
ENSG00000072110	0	2202.2	458.8	0.03	0.168	0.165	0	0
ENSG00000072121	0	5290.8	2326.2	0.01	0.055	0.248	0	0
ENSG00000072134	0	1374.3	548.7	0.01	0.079	0.153	2.42185e-11	5.02511e-12
ENSG00000072182	0	1525	470	0.01	0.077	0.194	4.65651e-09	7.13491e-10
ENSG00000072195	0	6781.9	2128.1	0.04	0.151	0.241	0	0
ENSG00000072201	0	1542.9	638.1	0.01	0.079	0.126	5.27356e-14	1.5554e-14
ENSG00000072274	0	1615.6	664.4	0.03	0.136	0.2	1.11022e-16	4.43952e-17
ENSG00000072310	0	2065.5	664.5	0.01	0.093	0.114	0	0
ENSG00000072315	0	2057.2	861.8	0	0.04	0.037	1.34337e-14	4.27267e-15
ENSG00000072364	0	2586.7	896.3	0.03	0.079	0.356	2.14911e-07	2.62688e-08
ENSG00000072401	0	313.5	106.5	0	0.041	0.077	0.0089415	0.000583931
ENSG00000072415	0	1566	459	0.02	0.095	0.19	1.14299e-09	1.90998e-10
ENSG00000072501	0	3007.8	688.2	0.02	0.08	0.21	5.4576e-11	1.08171e-11
ENSG00000072506	0	542.9	240.1	0.01	0.049	0.272	0.00707915	0.000468676
ENSG00000072518	0	1716.1	647.9	0	0.042	0.028	2.18936e-13	5.92623e-14
ENSG00000072571	0	1601.7	540.3	0.02	0.072	0.245	3.34557e-07	3.96848e-08
ENSG00000072609	0	1504	485	0.06	0.169	0.383	7.59869e-08	9.86391e-09
ENSG00000072657	0	2216.3	855.7	0.01	0.055	0.146	2.37743e-12	5.60468e-13
ENSG00000072682	0	1101.2	503.8	0	0.056	0.083	1.07152e-09	1.79907e-10
ENSG00000072736	0	2407.6	817.4	0.05	0.109	0.446	7.753e-07	8.71541e-08
ENSG00000072756	0	940.1	361.9	0.01	0.037	0.355	0.0129437	0.000827542
ENSG00000072778	0	1450	491	0.07	0.154	0.476	3.01193e-05	2.73007e-06
ENSG00000072786	0	2367.1	533.9	0.03	0.173	0.183	0	0
ENSG00000072803	0	1158.5	428.5	0	0.064	0.028	5.41012e-13	1.38635e-13
ENSG00000072818	0	1667.1	540.9	0.07	0.171	0.387	1.33641e-08	1.91516e-09
ENSG00000072840	0	2229.6	746.4	0.02	0.105	0.202	2.22045e-16	8.63792e-17
ENSG00000072849	0	525.1	191.9	0	0.06	0.001	2.84458e-07	3.41188e-08
ENSG00000072864	0	781.3	223.7	0.04	0.186	0.194	5.66656e-09	8.54998e-10
ENSG00000072952	0	1944.1	722.9	0.03	0.078	0.399	1.07493e-05	1.03196e-06
ENSG00000072954	0	611.4	165.6	0.01	0.085	0.098	3.34131e-06	3.44834e-07
ENSG00000072958	0	1077.3	191.7	0	0.191	0.001	0	0
ENSG00000073008	0	946.2	304.8	0.05	0.101	0.526	0.0113778	0.000732813
ENSG00000073009	0	1149.9	311.1	0.01	0.117	0.124	2.04131e-11	4.27683e-12
ENSG00000073050	0	1143.5	476.5	0.02	0.08	0.206	4.80758e-08	6.42101e-09
ENSG00000073060	0	1306.5	349.5	0.06	0.194	0.325	8.18984e-09	1.20801e-09
ENSG00000073146	0	2102.9	870.1	0.02	0.072	0.255	2.67746e-10	4.8841e-11
ENSG00000073150	0	1575.7	194.3	0.01	0.204	0.062	0	0
ENSG00000073169	0	1620.6	377.4	0.02	0.226	0.074	0	0
ENSG00000073282	0	1508.1	531.9	0	0.09	0.007	0	0
ENSG00000073331	0	2639	1093	0.03	0.066	0.463	1.54677e-05	1.45961e-06
ENSG00000073350	0	1122.3	287.7	0.01	0.153	0.048	0	0
ENSG00000073417	0	1743.9	743.1	0.01	0.043	0.189	1.66493e-07	2.06337e-08
ENSG00000073536	0	1116	339	0.01	0.056	0.13	6.41915e-07	7.31731e-08
ENSG00000073584	0	848.7	384.3	0	0.027	0.001	2.2441e-06	2.37223e-07
ENSG00000073614	0	3709.2	1351.8	0.01	0.093	0.16	0	0
ENSG00000073670	0	1792.5	484.5	0.02	0.142	0.12	0	0
ENSG00000073711	0	2428.9	1021.1	0.01	0.044	0.267	1.35256e-07	1.69435e-08
ENSG00000073712	0	1440.8	599.2	0	0.039	0.018	2.54712e-11	5.27155e-12
ENSG00000073734	0	2560.9	1057.1	0.02	0.071	0.277	2.99373e-11	6.15576e-12
ENSG00000073737	0	654.1	302.9	0.01	0.034	0.333	0.0271886	0.00167411
ENSG00000073756	0	1278.3	533.7	0.01	0.057	0.153	4.99538e-08	6.65723e-09
ENSG00000073792	0	1309.1	487.9	0	0.043	0.036	4.76853e-10	8.38452e-11
ENSG00000073803	0	2074.3	820.7	0.01	0.08	0.073	0	0
ENSG00000073849	0	886	332	0.01	0.053	0.22	0.000194363	1.57871e-05
ENSG00000073861	0	1208.1	396.9	0.01	0.083	0.113	3.90709e-11	7.91135e-12
ENSG00000073921	0	1398.1	536.9	0	0.047	0.031	4.858e-12	1.0988e-12
ENSG00000073969	0	1566.4	650.6	0	0.056	0.023	2.22045e-16	8.63792e-17
ENSG00000074054	0	3194.8	1404.2	0	0.047	0.021	0	0
ENSG00000074071	0	548.4	105.6	0.01	0.135	0.111	1.57281e-06	1.69552e-07
ENSG00000074181	0	5008.4	1615.6	0.02	0.124	0.125	0	0
ENSG00000074201	0	507.1	200.9	0.09	0.168	0.544	0.0330317	0.00201302
ENSG00000074211	0	1103.5	210.5	0.01	0.209	0.071	0	0
ENSG00000074266	0	1057.4	340.6	0	0.041	0.001	1.81698e-09	2.95315e-10
ENSG00000074276	0	3123.4	791.6	0.07	0.159	0.419	8.52023e-11	1.65198e-11
ENSG00000074317	0	271.1	130.9	0	0.065	0.001	2.51729e-05	2.30258e-06
ENSG00000074319	0	872.1	276.9	0.05	0.131	0.365	0.000304742	2.4087e-05
ENSG00000074370	0	2523.2	590.8	0.02	0.159	0.143	0	0
ENSG00000074410	0	771.8	290.2	0.02	0.066	0.306	0.00110783	8.09109e-05
ENSG00000074527	0	1285.7	598.3	0.01	0.043	0.24	2.87687e-05	2.61382e-06
ENSG00000074582	0	873.1	383.9	0.01	0.061	0.117	1.95961e-07	2.40895e-08
ENSG00000074590	0	1515.3	467.7	0.01	0.075	0.071	1.93179e-14	6.02354e-15
ENSG00000074621	0	1841.9	771.1	0.04	0.063	0.56	0.00467705	0.000316852
ENSG00000074660	0	1287.7	362.3	0.04	0.169	0.209	1.24178e-12	3.03518e-13
ENSG00000074695	0	1042	488	0.02	0.055	0.32	0.000329278	2.58975e-05
ENSG00000074696	0	782.8	303.2	0.02	0.085	0.178	4.62272e-06	4.67309e-07
ENSG00000074755	0	6367.3	2515.7	0.01	0.078	0.139	0	0
ENSG00000074803	0	2411.7	885.3	0.01	0.086	0.139	0	0
ENSG00000074935	0	985.1	376.9	0.01	0.054	0.15	3.7754e-06	3.86358e-07
ENSG00000074964	0	3061.9	769.1	0.01	0.135	0.077	0	0
ENSG00000075043	0	2140.7	433.3	0.03	0.217	0.122	0	0
ENSG00000075073	0	958.6	235.4	0.02	0.106	0.193	4.07615e-07	4.78613e-08
ENSG00000075089	0	684	258	0	0.037	0.001	1.05063e-06	1.16227e-07
ENSG00000075131	0	687.9	215.1	0.03	0.038	0.667	0.378846	0.0207384
ENSG00000075151	0	1064.1	441.9	0.03	0.054	0.504	0.0228188	0.0014171
ENSG00000075188	0	758.8	219.2	0	0.051	0.001	4.32006e-08	5.80918e-09
ENSG00000075213	0	1603.1	598.9	0.01	0.052	0.144	7.91851e-09	1.17012e-09
ENSG00000075234	0	967.8	349.2	0.02	0.085	0.284	2.17005e-05	2.00427e-06
ENSG00000075239	0	935.7	345.3	0.01	0.035	0.216	0.00153895	0.000110292
ENSG00000075240	0	848.1	237.9	0	0.082	0.044	5.38176e-10	9.38372e-11
ENSG00000075290	0	754.5	229.5	0	0.059	0.001	8.89437e-10	1.50836e-10
ENSG00000075292	0	4574.2	1341.8	0.03	0.061	0.423	1.3705e-07	1.71536e-08
ENSG00000075336	0	534.1	209.9	0.03	0.064	0.459	0.0514287	0.00306965
ENSG00000075340	0	1640.1	537.9	0	0.087	0.014	0	0
ENSG00000075391	0	2746.1	1039.9	0	0.036	0.041	3.33067e-16	1.27132e-16
ENSG00000075413	0	1748.7	579.3	0.04	0.114	0.361	4.88609e-07	5.67964e-08
ENSG00000075415	0	776.5	309.5	0.01	0.045	0.173	0.000258109	2.06198e-05
ENSG00000075420	0	2517.5	1094.5	0.01	0.052	0.102	1.11022e-16	4.43952e-17
ENSG00000075426	0	773.9	204.1	0	0.083	0.016	4.50917e-11	9.0403e-12
ENSG00000075429	0	325.4	91.6	0.01	0.109	0.058	1.9711e-05	1.8321e-06
ENSG00000075461	0	605.2	153.8	0.01	0.082	0.082	3.04894e-06	3.16628e-07
ENSG00000075568	0	3934.2	1423.8	0.02	0.086	0.192	0	0
ENSG00000075643	0	1796.1	723.9	0.02	0.093	0.253	4.64638e-11	9.29753e-12
ENSG00000075711	0	2009.4	750.6	0	0.095	0.016	0	0
ENSG00000075790	0	646.9	166.1	0.09	0.219	0.403	0.00112975	8.23554e-05
ENSG00000075826	0	2473.2	1054.8	0.04	0.079	0.558	0.000545764	4.14903e-05
ENSG00000075891	0	948.7	299.3	0.08	0.169	0.446	0.000207041	1.67655e-05
ENSG00000075914	0	625.1	247.9	0.01	0.077	0.085	2.55139e-07	3.08147e-08
ENSG00000075945	0	1877.7	483.3	0.05	0.145	0.357	1.27323e-06	1.38938e-07
ENSG00000075975	0	900.7	347.3	0.01	0.079	0.114	9.30362e-09	1.36021e-09
ENSG00000076003	0	1711.1	751.9	0	0.026	0.045	1.42522e-08	2.03405e-09
ENSG00000076043	0	530.5	180.5	0	0.048	0.079	0.000331628	2.60599e-05
ENSG00000076067	0	868.7	352.3	0	0.033	0.139	0.000335658	2.6368e-05
ENSG00000076108	0	3918.9	1793.1	0.01	0.043	0.178	2.22045e-16	8.63792e-17
ENSG00000076201	0	3528.6	1367.4	0.01	0.105	0.103	0	0
ENSG00000076242	0	1252.4	478.6	0.01	0.046	0.142	9.10456e-07	1.01566e-07
ENSG00000076248	0	685.7	253.3	0.01	0.114	0.131	1.21678e-08	1.75335e-09
ENSG00000076321	0	892.5	349.5	0	0.043	0.052	4.86468e-07	5.65565e-08
ENSG00000076344	0	1093.6	247.4	0.03	0.123	0.246	6.64457e-07	7.55424e-08
ENSG00000076351	0	1024.4	352.6	0.01	0.097	0.073	3.10862e-13	8.24638e-14
ENSG00000076356	0	4393.3	1288.7	0	0.091	0.018	0	0
ENSG00000076513	0	1330.4	439.6	0.03	0.104	0.296	1.49999e-06	1.62276e-07
ENSG00000076604	0	934.9	334.1	0	0.055	0.078	1.29085e-07	1.62233e-08
ENSG00000076641	0	914.6	381.4	0.02	0.098	0.205	8.19821e-08	1.05726e-08
ENSG00000076650	0	1747.3	784.7	0.02	0.069	0.229	7.95777e-10	1.35867e-10
ENSG00000076685	0	1190.5	492.5	0	0.047	0.001	6.5814e-13	1.66662e-13
ENSG00000076706	0	1394.8	477.2	0.01	0.077	0.188	5.78818e-09	8.72436e-10
ENSG00000076716	0	1225.3	442.7	0	0.046	0.108	4.04834e-07	4.75501e-08
ENSG00000076770	0	737.3	324.7	0	0.013	0.311	0.129941	0.00745319
ENSG00000076826	0	2850.9	872.1	0.01	0.127	0.051	0	0
ENSG00000076864	0	1665.3	371.7	0.02	0.136	0.114	0	0
ENSG00000076924	0	2089.4	475.6	0	0.175	0.019	0	0
ENSG00000076944	0	1070.3	285.7	0.01	0.134	0.043	0	0
ENSG00000077009	0	393.1	68.9	0	0.107	0.001	2.96803e-07	3.5512e-08
ENSG00000077044	0	2753.4	744.6	0.03	0.131	0.208	0	0
ENSG00000077063	0	3483	1500	0.01	0.047	0.218	2.43472e-13	6.54431e-14
ENSG00000077092	0	1029.8	335.2	0.06	0.173	0.343	1.79038e-06	1.91452e-07
ENSG00000077097	0	3713.5	1164.5	0	0.052	0.073	0	0
ENSG00000077147	0	1300.2	460.8	0	0.043	0.036	1.04882e-09	1.76229e-10
ENSG00000077150	0	1835.8	741.2	0.01	0.071	0.086	0	0
ENSG00000077152	0	445.2	145.8	0.12	0.06	1.966	0.101699	0.0058944
ENSG00000077232	0	1811.2	567.8	0	0.06	0.046	2.9976e-15	1.03155e-15
ENSG00000077235	0	4782.4	1532.6	0.02	0.111	0.185	0	0
ENSG00000077254	0	2250.3	563.7	0.04	0.109	0.334	1.51532e-07	1.88641e-08
ENSG00000077264	0	394	149	0	0.044	0.058	0.00138141	9.95874e-05
ENSG00000077274	0	1441.7	478.3	0.02	0.063	0.243	9.73806e-06	9.41055e-07
ENSG00000077279	0	996.8	326.2	0	0.026	0.117	0.00101691	7.4591e-05
ENSG00000077312	0	644.2	201.8	0	0.125	0.012	6.40599e-14	1.86679e-14
ENSG00000077327	0	1242.5	509.5	0.01	0.066	0.174	2.44002e-08	3.38193e-09
ENSG00000077380	0	1475.4	438.6	0	0.047	0.1	4.72989e-08	6.32188e-09
ENSG00000077420	0	1401.2	584.8	0.02	0.068	0.346	3.32003e-05	2.99374e-06
ENSG00000077454	0	1493.6	555.4	0.01	0.092	0.16	5.06595e-13	1.30273e-13
ENSG00000077458	0	766.5	250.5	0	0.045	0.058	2.0547e-05	1.90423e-06
ENSG00000077463	0	887.4	177.6	0.01	0.207	0.028	0	0
ENSG00000077498	0	1095.4	491.6	0.02	0.055	0.341	0.000552247	4.19395e-05
ENSG00000077514	0	1005	393	0.01	0.035	0.34	0.0107096	0.000691792
ENSG00000077522	0	2077.1	604.9	0	0.111	0.009	0	0
ENSG00000077616	0	1622.2	597.8	0.02	0.048	0.4	0.00117467	8.54339e-05
ENSG00000077684	0	1894.5	631.5	0	0.053	0.03	3.33067e-16	1.27132e-16
ENSG00000077713	0	514.4	235.6	0.03	0.03	0.912	0.855049	0.0451552
ENSG00000077721	0	300.2	155.8	0	0.014	0.001	0.0347224	0.0021106
ENSG00000077782	0	1655.6	537.4	0	0.074	0.026	0	0
ENSG00000077800	0	698.2	282.8	0.02	0.082	0.214	2.22401e-05	2.05099e-06
ENSG00000077943	0	2245.8	943.2	0.01	0.07	0.181	3.13083e-14	9.50666e-15
ENSG00000078018	0	3764.4	1650.6	0.01	0.045	0.25	2.54241e-12	5.97241e-13
ENSG00000078053	0	1457.3	624.7	0.02	0.088	0.237	2.52538e-09	4.02483e-10
ENSG00000078070	0	1521.1	653.9	0.01	0.07	0.18	2.16491e-10	3.993e-11
ENSG00000078098	0	1677	603	0	0.041	0.044	2.8882e-11	5.94714e-12
ENSG00000078124	0	571.3	229.7	0.01	0.028	0.314	0.0665077	0.00392764
ENSG00000078140	0	411.5	188.5	0	0.017	0.001	0.00809833	0.000532292
ENSG00000078142	0	1996.7	664.3	0	0.059	0.034	0	0
ENSG00000078177	0	3950	1357	0.02	0.064	0.284	2.70672e-13	7.23286e-14
ENSG00000078304	0	539.5	171.5	0.04	0.082	0.477	0.0828872	0.0048483
ENSG00000078369	0	727.5	292.5	0	0.058	0.001	2.43499e-10	4.46522e-11
ENSG00000078399	0	619.9	196.1	0	0.081	0.041	2.23648e-08	3.11459e-09
ENSG00000078401	0	445.5	187.5	0.03	0.074	0.408	0.0309654	0.00189357
ENSG00000078403	0	2236.4	808.6	0	0.048	0.085	5.28466e-14	1.55805e-14
ENSG00000078549	0	1100.1	297.9	0.04	0.14	0.281	5.05534e-07	5.85959e-08
ENSG00000078579	0	459.9	173.1	0.01	0.093	0.071	7.85567e-07	8.82811e-08
ENSG00000078589	0	747.8	269.2	0.01	0.057	0.143	5.77753e-05	5.03329e-06
ENSG00000078618	0	2384.9	876.1	0.01	0.046	0.111	2.09943e-12	4.98794e-13
ENSG00000078674	0	4672.6	1393.4	0.02	0.075	0.227	0	0
ENSG00000078687	0	3453.9	1604.1	0	0.034	0.138	2.86437e-14	8.75948e-15
ENSG00000078699	0	1195	557	0	0.09	0.028	0	0
ENSG00000078725	0	1732.7	550.3	0	0.042	0.001	4.21885e-15	1.41971e-15
ENSG00000078747	0	1980.2	725.8	0.02	0.036	0.43	0.00358083	0.000245604
ENSG00000078814	0	3802.9	847.1	0.02	0.209	0.087	0	0
ENSG00000078967	0	330.6	110.4	0	0.068	0.001	1.55108e-05	1.4633e-06
ENSG00000079102	0	1322.5	489.5	0.04	0.087	0.42	0.000314846	2.48266e-05
ENSG00000079134	0	1485.8	482.2	0	0.028	0.072	3.7101e-06	3.80101e-07
ENSG00000079150	0	476.3	189.7	0.01	0.037	0.307	0.0679241	0.00400452
ENSG00000079156	0	2069.1	732.9	0.02	0.072	0.23	9.25446e-10	1.56688e-10
ENSG00000079215	0	1134	492	0	0.052	0.035	2.23909e-11	4.66977e-12
ENSG00000079257	0	480.3	185.7	0.01	0.047	0.268	0.0206318	0.00128709
ENSG00000079277	0	1013.3	378.7	0.01	0.07	0.114	8.23114e-09	1.21386e-09
ENSG00000079308	0	3824	1348	0.02	0.103	0.188	0	0
ENSG00000079313	0	2856	645	0.02	0.195	0.098	0	0
ENSG00000079332	0	449.7	135.3	0.05	0.165	0.293	0.000796828	5.93599e-05
ENSG00000079337	0	2013.2	611.8	0.04	0.11	0.389	4.03415e-07	4.7391e-08
ENSG00000079387	0	1204	437	0.02	0.048	0.376	0.00380005	0.000259629
ENSG00000079432	0	2889.9	1349.1	0.01	0.059	0.102	0	0
ENSG00000079435	0	2325.2	827.8	0.05	0.134	0.369	4.00521e-11	8.08986e-12
ENSG00000079459	0	923.4	327.6	0	0.098	0.022	2.77556e-15	9.6102e-16
ENSG00000079616	0	1443.1	551.9	0.02	0.101	0.177	6.32827e-13	1.6053e-13
ENSG00000079689	0	584.6	243.4	0.02	0.05	0.311	0.0147372	0.000935982
ENSG00000079691	0	2631.7	992.3	0.02	0.055	0.297	5.19663e-08	6.90938e-09
ENSG00000079739	0	1207.4	490.6	0.01	0.064	0.079	3.87467e-11	7.85006e-12
ENSG00000079785	0	1630.5	589.5	0	0.049	0.037	2.28706e-13	6.17467e-14
ENSG00000079819	0	2235.6	779.4	0.02	0.053	0.283	5.96421e-07	6.83283e-08
ENSG00000079841	0	3571.8	1477.2	0	0.041	0.109	0	0
ENSG00000079950	0	515.3	267.7	0.01	0.065	0.188	0.000243459	1.95177e-05
ENSG00000079999	0	1128.2	197.8	0	0.227	0.02	0	0
ENSG00000080007	0	1432.9	511.1	0.01	0.04	0.372	0.00290796	0.000201468
ENSG00000080166	0	1100.6	456.4	0.02	0.068	0.263	1.05093e-05	1.01104e-06
ENSG00000080189	0	851.9	240.1	0.03	0.093	0.275	0.000201729	1.63554e-05
ENSG00000080298	0	1560.9	686.1	0	0.028	0.023	3.18072e-09	4.99839e-10
ENSG00000080345	0	5740.3	1654.7	0.02	0.072	0.322	7.77156e-16	2.85455e-16
ENSG00000080371	0	494.8	174.2	0	0.03	0.069	0.0038229	0.000261142
ENSG00000080493	0	2308.2	763.8	0.06	0.125	0.466	4.41785e-06	4.47838e-07
ENSG00000080503	0	2722	1025	0	0.062	0.018	0	0
ENSG00000080511	0	730.7	262.3	0.01	0.088	0.16	1.19474e-06	1.31057e-07
ENSG00000080546	0	1223.8	429.2	0	0.051	0.096	5.29041e-08	7.0235e-09
ENSG00000080561	0	1355	448	0	0.038	0.02	2.55892e-09	4.07295e-10
ENSG00000080603	0	6168.1	2885.9	0.05	0.091	0.551	2.11138e-10	3.90216e-11
ENSG00000080608	0	1204.8	433.2	0.01	0.062	0.216	7.86289e-06	7.67664e-07
ENSG00000080618	0	926.7	342.3	0.03	0.06	0.579	0.0786857	0.00461473
ENSG00000080644	0	1101.6	374.4	0	0.084	0.056	2.06502e-13	5.60627e-14
ENSG00000080709	0	1207.7	529.3	0	0.036	0.024	2.48656e-09	3.96468e-10
ENSG00000080815	0	956.2	432.8	0	0.044	0.001	1.29069e-10	2.44858e-11
ENSG00000080819	0	966.7	392.3	0.02	0.04	0.588	0.130587	0.00748614
ENSG00000080822	0	569	190	0	0.071	0.025	2.02671e-07	2.48475e-08
ENSG00000080823	0	438.8	149.2	0.01	0.066	0.177	0.0033273	0.000229114
ENSG00000080839	0	1803.2	536.8	0.09	0.144	0.593	0.00253222	0.000176794
ENSG00000080845	0	2332.8	643.2	0	0.073	0.012	0	0
ENSG00000081014	0	2651.1	759.9	0.09	0.161	0.529	9.90851e-06	9.57021e-07
ENSG00000081019	0	1595	667	0	0.035	0.072	5.58083e-09	8.4362e-10
ENSG00000081026	0	3068.5	1158.5	0.01	0.047	0.19	3.30858e-12	7.66622e-13
ENSG00000081059	0	557.4	156.6	0.07	0.18	0.37	0.00114053	8.30996e-05
ENSG00000081087	0	690.3	311.7	0.01	0.049	0.122	3.21856e-05	2.90619e-06
ENSG00000081138	0	1671.4	683.6	0	0.078	0.047	0	0
ENSG00000081154	0	403.6	130.4	0	0.008	0.298	0.415715	0.0226616
ENSG00000081177	0	1288.5	571.5	0.01	0.039	0.325	0.000888651	6.57444e-05
ENSG00000081181	0	743.4	318.6	0.01	0.053	0.102	3.654e-06	3.74827e-07
ENSG00000081189	0	1037.1	357.9	0.02	0.05	0.447	0.024043	0.00149034
ENSG00000081237	0	2911	908	0.07	0.074	0.892	0.478132	0.0258807
ENSG00000081307	0	936.7	269.3	0.12	0.214	0.569	0.00873547	0.0005716
ENSG00000081320	0	884.2	231.8	0.08	0.185	0.413	0.00102335	7.5041e-05
ENSG00000081377	0	1088	295	0.02	0.073	0.25	0.000132241	1.09749e-05
ENSG00000081479	0	9829.1	3982.9	0.01	0.058	0.167	0	0
ENSG00000081692	0	1090.8	298.2	0.02	0.15	0.147	9.25038e-13	2.29555e-13
ENSG00000081721	0	710.8	309.2	0.02	0.067	0.277	0.000489938	3.75431e-05
ENSG00000081760	0	1523.7	492.3	0.01	0.102	0.079	0	0
ENSG00000081803	0	2750.1	1077.9	0.01	0.056	0.125	9.99201e-16	3.63541e-16
ENSG00000081818	0	1739.4	645.6	0.02	0.082	0.257	2.17244e-09	3.49127e-10
ENSG00000081913	0	2820.6	1181.4	0.01	0.065	0.1	0	0
ENSG00000081923	0	2734.4	1015.6	0.04	0.087	0.41	1.60476e-07	1.99286e-08
ENSG00000082014	0	1108	341	0	0.057	0.001	3.8014e-13	9.95058e-14
ENSG00000082126	0	1392.1	515.9	0.03	0.088	0.326	3.61025e-06	3.70548e-07
ENSG00000082146	0	924.7	329.3	0.01	0.039	0.166	0.000298886	2.36601e-05
ENSG00000082175	0	1942.4	856.6	0.02	0.058	0.306	2.50185e-07	3.02563e-08
ENSG00000082196	0	657.5	257.5	0	0.041	0.074	6.89738e-05	5.93808e-06
ENSG00000082212	0	1192	401	0	0.051	0.083	2.88711e-08	3.96774e-09
ENSG00000082213	0	971.7	354.3	0.01	0.07	0.179	1.96162e-06	2.08756e-07
ENSG00000082258	0	1468	722	0	0.023	0.089	3.54363e-06	3.64068e-07
ENSG00000082269	0	3079.8	745.2	0.04	0.109	0.341	2.39387e-09	3.82608e-10
ENSG00000082293	0	2378.9	954.1	0.01	0.054	0.262	3.10724e-09	4.89029e-10
ENSG00000082397	0	2251.3	1003.7	0.01	0.05	0.136	3.13749e-13	8.31098e-14
ENSG00000082438	0	2504.6	993.4	0.02	0.061	0.406	7.45043e-06	7.3042e-07
ENSG00000082458	0	1860.3	686.7	0	0.044	0.049	3.30735e-13	8.73876e-14
ENSG00000082516	0	3206.5	1317.5	0.01	0.068	0.178	0	0
ENSG00000082641	0	1668.9	647.1	0	0.043	0.028	2.01728e-13	5.48685e-14
ENSG00000082684	0	2630.9	648.1	0.01	0.119	0.075	0	0
ENSG00000082701	0	975.2	323.8	0.05	0.134	0.394	0.000214437	1.73282e-05
ENSG00000082781	0	1802.6	594.4	0.01	0.095	0.071	0	0
ENSG00000082805	0	1641.4	518.6	0.01	0.131	0.057	0	0
ENSG00000082898	0	2384.7	828.3	0	0.03	0.001	3.88578e-15	1.3155e-15
ENSG00000082996	0	884.5	255.5	0.06	0.132	0.419	0.00218487	0.000153762
ENSG00000083067	0	3924.7	1214.3	0.02	0.099	0.16	0	0
ENSG00000083097	0	5502.2	1862.8	0.02	0.058	0.337	2.18303e-12	5.1731e-13
ENSG00000083123	0	836.9	312.1	0.07	0.17	0.399	6.44163e-05	5.56919e-06
ENSG00000083168	0	4319.6	1365.4	0.08	0.186	0.438	1.07692e-14	3.46136e-15
ENSG00000083223	0	3281.9	1188.1	0.02	0.059	0.269	2.13604e-11	4.4676e-12
ENSG00000083290	0	2133.9	887.1	0.01	0.049	0.202	1.59504e-09	2.60809e-10
ENSG00000083307	0	1406.9	444.1	0.01	0.075	0.153	4.75222e-09	7.27089e-10
ENSG00000083312	0	1785.7	782.3	0	0.038	0.03	4.66183e-13	1.20602e-13
ENSG00000083457	0	1247.2	417.8	0.03	0.098	0.297	1.12175e-06	1.23627e-07
ENSG00000083520	0	2180.4	693.6	0.03	0.097	0.33	5.87467e-08	7.75492e-09
ENSG00000083544	0	1525	425	0.01	0.065	0.193	2.30926e-07	2.81041e-08
ENSG00000083642	0	3144.1	1196.9	0	0.037	0.043	0	0
ENSG00000083720	0	1114.6	445.4	0.01	0.041	0.241	0.000269536	2.1488e-05
ENSG00000083782	0	709.4	256.6	0.01	0.057	0.15	8.04263e-05	6.85457e-06
ENSG00000083799	0	2182.6	685.4	0.03	0.121	0.254	4.05231e-13	1.05582e-13
ENSG00000083845	0	498.4	113.6	0	0.147	0.001	9.20375e-13	2.28553e-13
ENSG00000083857	0	9762.2	3998.8	0.02	0.135	0.14	0	0
ENSG00000083896	0	1667.5	513.5	0	0.04	0.03	4.3982e-11	8.84044e-12
ENSG00000083937	0	488.9	150.1	0.01	0.059	0.103	0.000519049	3.95911e-05
ENSG00000084070	0	911.7	375.3	0	0.042	0.079	2.82682e-06	2.95028e-07
ENSG00000084073	0	999.2	425.8	0	0.039	0.106	6.67973e-06	6.59376e-07
ENSG00000084090	0	663.9	221.1	0	0.07	0.065	8.68724e-07	9.70885e-08
ENSG00000084092	0	1506.9	587.1	0.03	0.053	0.595	0.0400062	0.0024147
ENSG00000084093	0	2329.2	937.8	0.02	0.04	0.524	0.0064874	0.00043169
ENSG00000084110	0	1379	592	0.02	0.101	0.154	3.18634e-14	9.66317e-15
ENSG00000084112	0	2213	826	0.02	0.097	0.192	1.11022e-16	4.43952e-17
ENSG00000084234	0	1515.6	668.4	0.01	0.084	0.095	3.33067e-16	1.27132e-16
ENSG00000084463	0	1314.7	608.3	0	0.022	0.103	4.23053e-05	3.75451e-06
ENSG00000084623	0	749.5	210.5	0.03	0.142	0.202	9.5296e-07	1.06081e-07
ENSG00000084628	0	379.6	103.4	0	0.048	0.001	0.000143643	1.18592e-05
ENSG00000084636	0	3075.1	1730.9	0.02	0.064	0.361	8.91204e-11	1.72474e-11
ENSG00000084652	0	873.4	260.6	0	0.081	0.001	1.23568e-13	3.44958e-14
ENSG00000084674	0	9510.4	4154.6	0.03	0.056	0.5	2.58082e-12	6.05681e-13
ENSG00000084676	0	3199.1	1117.9	0.02	0.055	0.356	7.74557e-07	8.70839e-08
ENSG00000084693	0	1911.6	743.4	0.03	0.07	0.4	2.71462e-05	2.47286e-06
ENSG00000084710	0	1705.6	472.4	0.03	0.201	0.129	0	0
ENSG00000084731	0	1911.1	467.9	0	0.091	0.052	0	0
ENSG00000084754	0	1601.1	687.9	0.01	0.058	0.165	7.34896e-10	1.26269e-10
ENSG00000084764	0	596	247	0	0.034	0.001	1.74078e-05	1.62901e-06
ENSG00000084774	0	4917.5	1751.5	0.07	0.162	0.428	0	0
ENSG00000085117	0	663.5	134.5	0.02	0.181	0.105	3.92012e-09	6.08313e-10
ENSG00000085185	0	3549.8	1583.2	0.01	0.064	0.112	0	0
ENSG00000085224	0	5791.4	1678.6	0.01	0.049	0.111	0	0
ENSG00000085274	0	1338.6	491.4	0.01	0.042	0.146	1.81605e-06	1.93999e-07
ENSG00000085276	0	2146.1	979.9	0	0.026	0.088	5.45586e-09	8.26438e-10
ENSG00000085365	0	733.9	220.1	0.05	0.143	0.373	0.000654774	4.92547e-05
ENSG00000085377	0	1542.4	587.6	0.01	0.084	0.063	0	0
ENSG00000085382	0	2125.2	601.8	0.02	0.109	0.204	9.17932e-13	2.28024e-13
ENSG00000085415	0	833.2	246.8	0.03	0.096	0.269	8.16377e-05	6.95214e-06
ENSG00000085433	0	2078.9	681.1	0	0.047	0.051	3.29736e-14	9.97502e-15
ENSG00000085449	0	913.7	313.3	0.01	0.048	0.162	7.17011e-05	6.15981e-06
ENSG00000085511	0	3130.4	1333.6	0.01	0.049	0.132	0	0
ENSG00000085563	0	2722.9	1117.1	0.02	0.05	0.393	5.9474e-06	5.91642e-07
ENSG00000085662	0	637.1	151.9	0.03	0.171	0.203	1.37589e-06	1.49426e-07
ENSG00000085719	0	1212.4	398.6	0.01	0.063	0.08	1.08182e-09	1.81398e-10
ENSG00000085721	0	1349.7	603.3	0.01	0.071	0.163	5.25506e-10	9.16936e-11
ENSG00000085733	0	1177.8	361.2	0.02	0.16	0.117	3.33067e-16	1.27132e-16
ENSG00000085741	0	848	214	0.01	0.088	0.056	1.76401e-09	2.87281e-10
ENSG00000085760	0	1620.6	536.4	0.04	0.048	0.776	0.318347	0.0175463
ENSG00000085831	0	1433.3	402.7	0.01	0.093	0.115	8.19012e-13	2.04914e-13
ENSG00000085832	0	1941.8	719.2	0.01	0.063	0.167	3.68382e-11	7.48208e-12
ENSG00000085840	0	1790.8	789.2	0.03	0.078	0.343	2.14885e-07	2.62688e-08
ENSG00000085872	0	2165.1	582.9	0	0.156	0.012	0	0
ENSG00000085978	0	1256.1	507.9	0.01	0.066	0.086	1.45595e-11	3.10835e-12
ENSG00000085982	0	2609.5	1128.5	0.02	0.05	0.392	6.79434e-06	6.70327e-07
ENSG00000085998	0	1635.3	608.7	0.01	0.047	0.16	4.88461e-08	6.51674e-09
ENSG00000085999	0	822.8	344.2	0.01	0.063	0.16	4.05112e-06	4.13012e-07
ENSG00000086015	0	3780.6	1601.4	0.01	0.058	0.236	2.22045e-16	8.63792e-17
ENSG00000086065	0	505.1	151.9	0	0.049	0.001	1.72697e-05	1.61692e-06
ENSG00000086189	0	693.4	245.6	0.05	0.143	0.36	0.00056014	4.25256e-05
ENSG00000086200	0	2150.2	774.8	0	0.049	0.029	0	0
ENSG00000086232	0	1341.5	548.5	0.03	0.078	0.35	2.22496e-05	2.05136e-06
ENSG00000086289	0	519.1	152.9	0.02	0.123	0.131	2.23478e-06	2.36311e-07
ENSG00000086475	0	816.4	359.6	0	0.079	0.001	2.9976e-15	1.03155e-15
ENSG00000086504	0	619	149	0.02	0.159	0.156	5.96858e-07	6.83676e-08
ENSG00000086544	0	1420.9	439.1	0.1	0.178	0.545	0.000475969	3.65647e-05
ENSG00000086570	0	9089.6	3957.4	0.01	0.061	0.226	0	0
ENSG00000086589	0	905.4	354.6	0	0.064	0.001	3.8014e-13	9.95058e-14
ENSG00000086598	0	420.7	182.3	0.01	0.067	0.215	0.0024004	0.000168137
ENSG00000086619	0	195.2	101.8	0.01	0.01	0.537	0.664325	0.0354599
ENSG00000086666	0	476	148	0.01	0.045	0.14	0.00489804	0.000331087
ENSG00000086712	0	1089	483	0.01	0.051	0.148	1.31541e-06	1.43236e-07
ENSG00000086717	0	1455.7	503.3	0.02	0.047	0.509	0.0263095	0.0016234
ENSG00000086758	0	9185.6	3936.4	0	0.032	0.069	0	0
ENSG00000086827	0	1637.7	696.3	0.01	0.053	0.105	1.71572e-11	3.62585e-12
ENSG00000086848	0	886.5	433.5	0	0.065	0.036	2.17794e-11	4.54743e-12
ENSG00000086967	0	990.3	233.7	0.02	0.149	0.112	9.1771e-13	2.28024e-13
ENSG00000086991	0	1225.5	499.5	0.02	0.064	0.333	0.000124543	1.03643e-05
ENSG00000087008	0	1316	469	0.06	0.2	0.289	8.20055e-12	1.80836e-12
ENSG00000087053	0	1376.2	552.8	0	0.044	0.1	1.41585e-08	2.02146e-09
ENSG00000087076	0	231.6	86.4	0.01	0.085	0.161	0.0071289	0.000471671
ENSG00000087077	0	1004	424	0.01	0.104	0.077	6.10623e-15	2.00948e-15
ENSG00000087085	0	1357.4	460.6	0.03	0.164	0.162	0	0
ENSG00000087087	0	1943.9	612.1	0	0.135	0.011	0	0
ENSG00000087095	0	954.9	536.1	0	0.013	0.001	0.000160752	1.31838e-05
ENSG00000087111	0	1208.1	456.9	0.01	0.076	0.168	5.09959e-09	7.7585e-10
ENSG00000087157	0	1253	415	0.01	0.099	0.074	1.22124e-15	4.41251e-16
ENSG00000087191	0	858.2	290.8	0.01	0.091	0.119	1.77508e-08	2.50401e-09
ENSG00000087245	0	1506	474	0	0.116	0.012	0	0
ENSG00000087253	0	1150.3	481.7	0.01	0.054	0.243	1.99034e-05	1.8481e-06
ENSG00000087258	0	866.1	195.9	0	0.05	0.001	5.19688e-08	6.90938e-09
ENSG00000087263	0	1230.5	389.5	0.06	0.112	0.561	0.0214505	0.00133577
ENSG00000087266	0	1297.6	382.4	0.04	0.162	0.267	2.03366e-10	3.76518e-11
ENSG00000087269	0	1878.4	692.6	0.02	0.108	0.172	2.22045e-16	8.63792e-17
ENSG00000087274	0	1627.7	676.3	0	0.063	0.059	4.44089e-16	1.67323e-16
ENSG00000087299	0	1009.9	379.1	0.02	0.059	0.261	0.000124047	1.03254e-05
ENSG00000087302	0	518.3	213.7	0	0.049	0.001	1.20943e-06	1.32511e-07
ENSG00000087303	0	2903	1222	0.01	0.074	0.188	0	0
ENSG00000087338	0	1138.3	406.7	0	0.034	0.132	6.94696e-05	5.97864e-06
ENSG00000087365	0	2012.2	642.8	0.05	0.139	0.389	3.67357e-08	4.98262e-09
ENSG00000087448	0	892.1	241.9	0	0.043	0.052	5.6069e-06	5.59598e-07
ENSG00000087460	0	1954.4	751.6	0.02	0.066	0.374	8.26213e-06	8.05028e-07
ENSG00000087470	0	1662.1	551.9	0	0.051	0.001	0	0
ENSG00000087494	0	478.2	145.8	0.02	0.086	0.201	0.00106032	7.75806e-05
ENSG00000087495	0	1199.4	477.6	0.01	0.054	0.157	2.58401e-07	3.11674e-08
ENSG00000087502	0	874.3	253.7	0.05	0.085	0.601	0.091995	0.00535574
ENSG00000087510	0	980.5	369.5	0.01	0.089	0.059	2.55906e-13	6.86087e-14
ENSG00000087586	0	847.8	358.2	0.01	0.052	0.231	0.000215533	1.7405e-05
ENSG00000087589	0	1683.1	674.9	0.03	0.073	0.443	0.0001826	1.48837e-05
ENSG00000087842	0	624.5	245.5	0	0.052	0.092	3.14117e-05	2.83947e-06
ENSG00000087884	0	247	119	0	0.017	0.001	0.034083	0.00207381
ENSG00000087903	0	1763.7	405.3	0.02	0.184	0.13	0	0
ENSG00000087916	0	1382	544	0.01	0.051	0.274	3.5069e-05	3.15329e-06
ENSG00000088035	0	1046.9	399.1	0.01	0.069	0.17	4.40674e-07	5.15112e-08
ENSG00000088038	0	1156.4	394.6	0.03	0.115	0.291	6.60133e-07	7.50625e-08
ENSG00000088179	0	2102	676	0	0.032	0.075	5.52834e-09	8.36724e-10
ENSG00000088205	0	1536.3	443.7	0.08	0.215	0.391	7.68029e-08	9.95392e-09
ENSG00000088247	0	1325.7	510.3	0.02	0.096	0.189	1.03252e-10	1.98561e-11
ENSG00000088256	0	978.6	98.4	0	0.204	0.015	1.11022e-16	4.43952e-17
ENSG00000088298	0	1283.7	450.3	0.01	0.054	0.132	7.97242e-08	1.03015e-08
ENSG00000088305	0	1958.2	573.8	0.03	0.099	0.259	4.9631e-10	8.70359e-11
ENSG00000088325	0	1647.4	590.6	0.01	0.048	0.231	3.9166e-06	4.00136e-07
ENSG00000088386	0	1530.8	593.2	0.04	0.1	0.42	1.85929e-05	1.7337e-06
ENSG00000088387	0	4679.8	1482.2	0.02	0.098	0.154	0	0
ENSG00000088448	0	895.7	364.3	0	0.054	0.085	1.55963e-07	1.93878e-08
ENSG00000088538	0	4560	1494	0.01	0.054	0.163	0	0
ENSG00000088543	0	362.2	123.8	0.01	0.041	0.137	0.0118025	0.000758762
ENSG00000088682	0	683	271	0.03	0.076	0.447	0.0149238	0.000947094
ENSG00000088727	0	207.5	65.5	0.03	0.085	0.359	0.146118	0.00832616
ENSG00000088766	0	638.9	261.1	0.1	0.216	0.466	0.000459004	3.53246e-05
ENSG00000088808	0	2218.5	1051.5	0.01	0.067	0.117	0	0
ENSG00000088812	0	3137.7	1041.3	0.02	0.09	0.261	1.27676e-14	4.07143e-15
ENSG00000088833	0	841.8	274.2	0.01	0.031	0.196	0.00628551	0.000418981
ENSG00000088836	0	2159.6	510.4	0.03	0.192	0.163	0	0
ENSG00000088854	0	2442.1	1007.9	0.01	0.045	0.195	6.70562e-10	1.15705e-10
ENSG00000088882	0	1643.4	552.6	0.01	0.08	0.148	1.54399e-12	3.71296e-13
ENSG00000088899	0	1581.1	437.9	0	0.147	0.013	0	0
ENSG00000088930	0	2228.9	621.1	0.01	0.054	0.15	1.12776e-09	1.88624e-10
ENSG00000089006	0	910.4	301.6	0	0.068	0.033	9.95238e-10	1.67713e-10
ENSG00000089022	0	960.1	452.9	0	0.025	0.043	2.24044e-05	2.06459e-06
ENSG00000089048	0	1892.8	651.2	0.03	0.072	0.375	2.44459e-05	2.24e-06
ENSG00000089057	0	1385.3	564.7	0	0.092	0.001	0	0
ENSG00000089060	0	498.5	170.5	0.01	0.127	0.085	4.01445e-08	5.41717e-09
ENSG00000089091	0	1370.5	471.5	0.09	0.175	0.493	6.47197e-05	5.59425e-06
ENSG00000089094	0	3219.1	776.9	0.02	0.122	0.189	0	0
ENSG00000089101	0	2653.8	1057.2	0.02	0.053	0.289	1.40367e-08	2.00525e-09
ENSG00000089123	0	894.1	365.9	0	0.053	0.065	5.0786e-08	6.75951e-09
ENSG00000089154	0	6008.7	1992.3	0.03	0.129	0.199	0	0
ENSG00000089157	0	679.2	271.8	0	0.038	0.001	6.19943e-07	7.08786e-08
ENSG00000089163	0	169.9	82.1	0.02	0.036	0.509	0.424505	0.0231218
ENSG00000089169	0	1523.6	558.4	0.01	0.08	0.107	3.77476e-14	1.13347e-14
ENSG00000089177	0	2878.5	1297.5	0.01	0.037	0.316	8.75195e-07	9.77817e-08
ENSG00000089195	0	1046.5	444.5	0.01	0.04	0.168	4.11005e-05	3.65736e-06
ENSG00000089220	0	432.5	128.5	0.01	0.048	0.2	0.0142923	0.000908991
ENSG00000089225	0	1144	410	0	0.089	0.02	0	0
ENSG00000089234	0	1240.5	535.5	0	0.071	0.069	3.56937e-13	9.38017e-14
ENSG00000089250	0	3007.8	967.2	0.01	0.114	0.059	0	0
ENSG00000089280	0	1055.2	504.8	0.01	0.051	0.25	3.09274e-05	2.7988e-06
ENSG00000089472	0	2496.3	977.7	0.02	0.052	0.29	6.13827e-08	8.06993e-09
ENSG00000089486	0	447.5	176.5	0.03	0.089	0.321	0.00490053	0.000331224
ENSG00000089558	0	2290.9	748.1	0.01	0.074	0.196	4.92606e-13	1.26988e-13
ENSG00000089597	0	2046.7	851.3	0.01	0.054	0.157	1.35899e-11	2.91071e-12
ENSG00000089682	0	886.1	352.9	0.01	0.023	0.242	0.0147419	0.000936122
ENSG00000089685	0	239.7	81.3	0.02	0.053	0.318	0.132182	0.00757046
ENSG00000089693	0	557.4	186.6	0	0.083	0.001	2.47504e-10	4.5341e-11
ENSG00000089723	0	515	184	0	0.078	0.001	2.5747e-09	4.09628e-10
ENSG00000089737	0	1852.9	712.1	0.02	0.092	0.243	6.3757e-11	1.2528e-11
ENSG00000089775	0	883	422	0.02	0.04	0.381	0.0124224	0.000796233
ENSG00000089818	0	579.3	245.7	0.01	0.066	0.16	7.35748e-05	6.30742e-06
ENSG00000089820	0	2119.5	532.5	0.04	0.203	0.194	0	0
ENSG00000089876	0	1584	645	0.01	0.05	0.282	1.50626e-05	1.42415e-06
ENSG00000089902	0	800.7	273.3	0.03	0.135	0.205	1.83953e-07	2.26859e-08
ENSG00000090006	0	2285.4	801.6	0.01	0.107	0.106	0	0
ENSG00000090013	0	424.2	136.8	0.03	0.141	0.2	5.74188e-05	5.00461e-06
ENSG00000090061	0	722.9	447.1	0	0.069	0.021	7.08566e-12	1.57439e-12
ENSG00000090104	0	412.2	175.8	0.01	0.03	0.484	0.255584	0.0142027
ENSG00000090238	0	311	46	0	0.046	0.001	0.00480731	0.000325284
ENSG00000090263	0	220.3	97.7	0.03	0.032	0.859	0.837654	0.0442846
ENSG00000090266	0	219.4	95.6	0.05	0.059	0.793	0.686692	0.0366082
ENSG00000090316	0	995	193	0	0.163	0.001	0	0
ENSG00000090372	0	1537.4	439.6	0.02	0.195	0.121	0	0
ENSG00000090382	0	319.3	124.7	0.06	0.026	2.422	0.129441	0.00742511
ENSG00000090402	0	4260.4	1208.6	0.05	0.12	0.43	1.04132e-10	2.00147e-11
ENSG00000090432	0	790.2	265.8	0	0.076	0.017	2.5292e-11	5.23744e-12
ENSG00000090470	0	1000.8	454.2	0.01	0.077	0.16	7.65957e-09	1.13369e-09
ENSG00000090487	0	643.7	280.3	0	0.067	0.024	6.51151e-09	9.73427e-10
ENSG00000090530	0	1474.5	640.5	0.01	0.075	0.119	2.15827e-13	5.84859e-14
ENSG00000090539	0	2021.2	843.8	0.02	0.064	0.244	6.73023e-10	1.16102e-10
ENSG00000090565	0	1532.1	318.9	0.01	0.147	0.05	0	0
ENSG00000090615	0	3468.2	1025.8	0.01	0.124	0.112	0	0
ENSG00000090621	0	1422	558	0	0.038	0.018	5.83911e-11	1.15509e-11
ENSG00000090661	0	896.8	282.2	0.03	0.164	0.188	1.57321e-10	2.9531e-11
ENSG00000090674	0	1403.2	336.8	0.01	0.107	0.061	1.11022e-16	4.43952e-17
ENSG00000090686	0	2357.4	744.6	0.01	0.063	0.22	7.15721e-09	1.06278e-09
ENSG00000090776	0	823.1	214.9	0.01	0.058	0.171	0.000142892	1.18042e-05
ENSG00000090857	0	1897.5	739.5	0	0.06	0.072	6.66134e-16	2.46161e-16
ENSG00000090861	0	2134.4	763.6	0.03	0.155	0.194	0	0
ENSG00000090863	0	2744.6	843.4	0.04	0.16	0.251	0	0
ENSG00000090905	0	4074.3	1730.7	0	0.021	0.203	4.89847e-08	6.53285e-09
ENSG00000090920	0	3790.2	1066.8	0.03	0.124	0.241	0	0
ENSG00000090924	0	2717.8	1311.2	0.02	0.085	0.282	3.55271e-15	1.21173e-15
ENSG00000090971	0	430.5	118.5	0.01	0.136	0.053	7.6212e-08	9.88961e-09
ENSG00000090975	0	3149.2	723.8	0.01	0.155	0.04	0	0
ENSG00000090989	0	1932.6	749.4	0	0.04	0.053	4.01546e-12	9.19332e-13
ENSG00000091009	0	2291.7	888.3	0	0.044	0.06	3.21965e-15	1.10432e-15
ENSG00000091010	0	806.7	207.3	0	0.08	0.001	2.40252e-12	5.66018e-13
ENSG00000091039	0	1952.9	714.1	0	0.049	0.021	0	0
ENSG00000091073	0	1471	395	0.02	0.146	0.111	0	0
ENSG00000091127	0	1441.3	541.7	0.01	0.052	0.121	9.71674e-09	1.41806e-09
ENSG00000091128	0	3827.8	1446.2	0.04	0.075	0.465	2.30647e-07	2.80748e-08
ENSG00000091129	0	2788.6	1123.4	0.01	0.051	0.145	9.32587e-15	3.01204e-15
ENSG00000091136	0	3909.8	1439.2	0.01	0.071	0.099	0	0
ENSG00000091137	0	1629.5	710.5	0.01	0.072	0.15	8.09575e-13	2.029e-13
ENSG00000091138	0	1641	633	0.08	0.09	0.844	0.357426	0.0196099
ENSG00000091140	0	1145.6	381.4	0	0.02	0.224	0.0115234	0.000741867
ENSG00000091157	0	3173.5	1296.5	0	0.06	0.063	0	0
ENSG00000091164	0	663.5	203.5	0	0.054	0.056	1.12476e-05	1.07668e-06
ENSG00000091409	0	2505.3	884.7	0.01	0.052	0.163	5.02587e-12	1.13396e-12
ENSG00000091428	0	2214.6	755.4	0.03	0.075	0.372	4.9086e-06	4.94907e-07
ENSG00000091436	0	1693.7	706.3	0.01	0.048	0.111	1.62336e-10	3.04176e-11
ENSG00000091483	0	1100.9	429.1	0.01	0.064	0.114	5.06665e-09	7.7132e-10
ENSG00000091513	0	1516.6	571.4	0.05	0.095	0.534	0.00202127	0.000142813
ENSG00000091536	0	8158.1	2380.9	0.04	0.145	0.253	0	0
ENSG00000091542	0	938.1	183.9	0.01	0.07	0.077	5.39429e-07	6.22651e-08
ENSG00000091640	0	404.7	168.3	0	0.086	0.028	4.63598e-07	5.40266e-08
ENSG00000091656	0	7122.2	2522.8	0.02	0.071	0.349	0	0
ENSG00000091664	0	1254.8	491.2	0	0.06	0.04	6.28497e-13	1.59487e-13
ENSG00000091704	0	1017.8	239.2	0.02	0.129	0.167	5.8044e-09	8.747e-10
ENSG00000091732	0	1051.7	454.3	0.01	0.045	0.148	4.32216e-06	4.38808e-07
ENSG00000091831	0	1354.1	430.9	0.01	0.059	0.089	5.01569e-10	8.79068e-11
ENSG00000091879	0	1058.3	429.7	0	0.062	0.077	1.99703e-09	3.21786e-10
ENSG00000091947	0	583.7	187.3	0	0.027	0.129	0.00938638	0.000610986
ENSG00000091986	0	2070.9	779.1	0.01	0.068	0.167	6.62914e-13	1.67813e-13
ENSG00000092010	0	532.3	175.7	0.06	0.107	0.583	0.115756	0.00667417
ENSG00000092020	0	980.2	378.8	0	0.036	0.114	5.59962e-05	4.8882e-06
ENSG00000092068	0	1195.3	409.7	0.01	0.049	0.123	3.85172e-07	4.53646e-08
ENSG00000092094	0	699.5	305.5	0	0.045	0.032	6.23802e-07	7.12529e-08
ENSG00000092096	0	1192.9	421.1	0	0.073	0.023	9.99201e-16	3.63541e-16
ENSG00000092108	0	1430.2	492.8	0	0.041	0.051	1.85694e-09	3.0134e-10
ENSG00000092140	0	1647.5	470.5	0.01	0.031	0.276	0.00141035	0.000101474
ENSG00000092148	0	4672.5	1702.5	0	0.037	0.006	0	0
ENSG00000092201	0	1902.3	755.7	0	0.048	0.001	0	0
ENSG00000092203	0	1314.8	548.2	0	0.041	0.019	3.30984e-11	6.75443e-12
ENSG00000092295	0	1834.7	616.3	0.01	0.102	0.092	0	0
ENSG00000092345	0	652.8	232.2	0.01	0.033	0.239	0.0166826	0.00105304
ENSG00000092421	0	2388.3	752.7	0.04	0.122	0.29	5.66658e-13	1.44801e-13
ENSG00000092439	0	4153.7	1036.3	0.1	0.221	0.456	1.73628e-12	4.1535e-13
ENSG00000092445	0	1941.5	701.5	0.04	0.105	0.363	6.12207e-08	8.05008e-09
ENSG00000092470	0	1379.5	492.5	0.02	0.044	0.4	0.0041845	0.000284857
ENSG00000092529	0	1872.1	590.9	0.01	0.101	0.148	2.22045e-15	7.76916e-16
ENSG00000092531	0	435.1	197.9	0.02	0.04	0.373	0.0858302	0.00501259
ENSG00000092621	0	1180.8	418.2	0.01	0.087	0.06	5.77316e-15	1.90675e-15
ENSG00000092758	0	371.4	189.6	0.07	0.128	0.571	0.0790442	0.0046339
ENSG00000092820	0	1375.8	376.2	0.01	0.11	0.053	0	0
ENSG00000092841	0	346.7	88.3	0.02	0.061	0.287	0.0604497	0.00358583
ENSG00000092847	0	1955.3	612.7	0.03	0.103	0.322	4.70503e-08	6.2921e-09
ENSG00000092850	0	974.1	315.9	0.02	0.066	0.363	0.00249351	0.000174225
ENSG00000092853	0	1435.5	508.5	0.02	0.044	0.447	0.00993679	0.000645008
ENSG00000092871	0	767.4	321.6	0.01	0.035	0.303	0.0115364	0.000742509
ENSG00000092929	0	2603.1	666.9	0.02	0.12	0.127	0	0
ENSG00000092931	0	1015.6	331.4	0.04	0.102	0.345	0.000184478	1.50284e-05
ENSG00000092964	0	1195	482	0	0.053	0.001	1.06581e-14	3.42718e-15
ENSG00000092969	0	920.6	405.4	0	0.033	0.001	5.08276e-08	6.76382e-09
ENSG00000092978	0	1222.2	361.8	0.04	0.098	0.377	0.00030716	2.42624e-05
ENSG00000093000	0	991.3	409.7	0.01	0.085	0.169	1.42061e-08	2.02787e-09
ENSG00000093009	0	1228.9	469.1	0.01	0.084	0.099	1.47227e-12	3.54867e-13
ENSG00000093010	0	651.7	158.3	0.04	0.177	0.203	5.64209e-07	6.48822e-08
ENSG00000093072	0	1179.7	347.3	0.07	0.151	0.433	8.77177e-05	7.44647e-06
ENSG00000093144	0	678.6	242.4	0.01	0.04	0.266	0.0105862	0.000684303
ENSG00000093167	0	1267.3	487.7	0.01	0.034	0.308	0.00250188	0.000174759
ENSG00000093183	0	611.5	297.5	0.02	0.032	0.469	0.120761	0.00694846
ENSG00000094631	0	2539.7	1147.3	0.01	0.041	0.195	2.60101e-10	4.75058e-11
ENSG00000094755	0	919.2	400.8	0	0.057	0.08	2.19393e-08	3.06116e-09
ENSG00000094804	0	1175	502	0.02	0.051	0.386	0.00181259	0.000128792
ENSG00000094841	0	679.4	247.6	0.01	0.039	0.346	0.0321594	0.00196166
ENSG00000094880	0	1190.6	582.4	0	0.05	0.088	2.87175e-09	4.54217e-10
ENSG00000094914	0	501.1	185.9	0.02	0.076	0.314	0.00675873	0.000448968
ENSG00000094916	0	371.2	201.8	0	0.034	0.001	0.000172529	1.41022e-05
ENSG00000094975	0	3145	1061	0.02	0.053	0.329	6.49582e-08	8.50327e-09
ENSG00000095002	0	1921.9	661.1	0.01	0.071	0.091	2.33147e-15	8.11873e-16
ENSG00000095059	0	863.5	243.5	0.01	0.079	0.135	6.70724e-07	7.61363e-08
ENSG00000095139	0	1199.5	456.5	0.01	0.046	0.166	5.25951e-06	5.27521e-07
ENSG00000095203	0	1776	618	0.03	0.069	0.404	0.000152183	1.25232e-05
ENSG00000095303	0	1354.1	442.9	0.01	0.105	0.1	1.9984e-15	7.02589e-16
ENSG00000095321	0	1517.3	360.7	0.01	0.146	0.061	0	0
ENSG00000095370	0	2017.7	559.3	0.02	0.099	0.16	2.33147e-15	8.11873e-16
ENSG00000095383	0	2156.7	588.3	0.02	0.12	0.152	0	0
ENSG00000095397	0	2124.2	596.8	0.01	0.102	0.128	0	0
ENSG00000095464	0	1835.1	738.9	0.01	0.058	0.105	8.16236e-13	2.0443e-13
ENSG00000095485	0	1119.6	491.4	0.02	0.034	0.469	0.0376059	0.00227716
ENSG00000095539	0	1792.5	721.5	0.01	0.065	0.123	1.0314e-13	2.90819e-14
ENSG00000095564	0	4264.4	1261.6	0.01	0.074	0.187	0	0
ENSG00000095574	0	894.8	362.2	0	0.038	0.001	1.70188e-08	2.40493e-09
ENSG00000095585	0	903.1	419.9	0.01	0.057	0.196	1.25192e-05	1.19325e-06
ENSG00000095627	0	2610.7	956.3	0.02	0.061	0.291	6.14922e-09	9.23235e-10
ENSG00000095637	0	1805.5	597.5	0.04	0.107	0.403	3.87277e-06	3.95934e-07
ENSG00000095713	0	1483.6	469.4	0.01	0.097	0.071	0	0
ENSG00000095739	0	551	229	0.01	0.05	0.148	0.000555842	4.22037e-05
ENSG00000095777	0	3571.4	1276.6	0.02	0.052	0.343	2.79308e-08	3.84574e-09
ENSG00000095787	0	1447.3	475.7	0.01	0.041	0.157	8.7159e-06	8.47095e-07
ENSG00000095794	0	752.8	279.2	0.04	0.145	0.275	3.90429e-06	3.98934e-07
ENSG00000095951	0	1233.1	617.9	0.03	0.064	0.435	0.000864136	6.40474e-05
ENSG00000096070	0	2213.7	798.3	0.01	0.048	0.172	5.67315e-10	9.86353e-11
ENSG00000096080	0	543.5	242.5	0.04	0.051	0.734	0.430325	0.0234213
ENSG00000096093	0	1297.8	622.2	0.01	0.064	0.159	1.90826e-09	3.08777e-10
ENSG00000096384	0	1649.3	507.7	0.01	0.095	0.088	1.44329e-14	4.57454e-15
ENSG00000096401	0	1603.2	802.8	0	0.036	0.035	3.06422e-12	7.13169e-13
ENSG00000096696	0	6458.7	2154.3	0.01	0.059	0.096	0	0
ENSG00000096717	0	1635.1	566.9	0.03	0.06	0.537	0.0185481	0.00116365
ENSG00000096746	0	745.1	292.9	0	0.014	0.001	0.0012859	9.30605e-05
ENSG00000096872	0	1359.6	440.4	0.02	0.047	0.496	0.0292502	0.00179329
ENSG00000096968	0	2569.6	826.4	0	0.049	0.064	4.44089e-16	1.67323e-16
ENSG00000097007	0	1920.1	653.9	0.01	0.092	0.088	0	0
ENSG00000097046	0	1254.3	467.7	0.02	0.042	0.372	0.00391424	0.000267156
ENSG00000097096	0	2443.3	901.7	0.02	0.042	0.421	0.000310053	2.44751e-05
ENSG00000099139	0	3381.6	1214.4	0.02	0.072	0.342	1.44542e-10	2.72162e-11
ENSG00000099194	0	738.5	245.5	0.02	0.082	0.279	0.000489141	3.74938e-05
ENSG00000099203	0	547.2	133.8	0	0.083	0.022	1.85643e-07	2.28866e-08
ENSG00000099204	0	1743.9	590.1	0.02	0.081	0.253	3.15547e-08	4.31705e-09
ENSG00000099219	0	1916.6	795.4	0.01	0.047	0.26	7.15338e-07	8.08489e-08
ENSG00000099246	0	656.4	210.6	0.02	0.034	0.695	0.469477	0.025431
ENSG00000099250	0	1959.5	809.5	0.01	0.059	0.116	1.18794e-13	3.32648e-14
ENSG00000099256	0	481.1	190.9	0.02	0.051	0.331	0.031552	0.00192687
ENSG00000099260	0	1193.3	459.7	0.01	0.066	0.179	2.55332e-07	3.08278e-08
ENSG00000099282	0	688.7	193.3	0.01	0.121	0.062	1.42467e-10	2.68393e-11
ENSG00000099284	0	813.2	302.8	0	0.047	0.027	7.993e-08	1.03262e-08
ENSG00000099308	0	3028.3	856.7	0.02	0.154	0.099	0	0
ENSG00000099331	0	5008.4	1234.6	0.01	0.145	0.067	0	0
ENSG00000099364	0	1275.2	476.8	0	0.061	0.001	0	0
ENSG00000099365	0	662.2	171.8	0	0.07	0.001	3.60381e-09	5.62095e-10
ENSG00000099377	0	605.6	180.4	0.02	0.158	0.121	3.0915e-09	4.86761e-10
ENSG00000099381	0	713.9	138.1	0	0.222	0.001	0	0
ENSG00000099622	0	439.8	166.2	0.1	0.197	0.489	0.0100762	0.000653531
ENSG00000099624	0	399	105	0.01	0.213	0.048	8.59836e-11	1.66669e-11
ENSG00000099625	0	1566.5	362.5	0.02	0.187	0.096	0	0
ENSG00000099795	0	358.3	52.7	0.04	0.228	0.164	0.000132933	1.10273e-05
ENSG00000099800	0	245.5	39.5	0	0.193	0.021	8.62597e-06	8.38913e-07
ENSG00000099810	0	619.8	226.2	0.02	0.1	0.225	0.000117471	9.81199e-06
ENSG00000099814	0	3416.6	1032.4	0.04	0.174	0.215	0	0
ENSG00000099817	0	480.6	89.4	0	0.165	0.025	4.19301e-09	6.47223e-10
ENSG00000099849	0	746.9	366.1	0.02	0.08	0.228	8.33458e-06	8.11762e-07
ENSG00000099875	0	1132.1	214.9	0	0.183	0.015	0	0
ENSG00000099889	0	2162.7	723.3	0.01	0.116	0.097	0	0
ENSG00000099899	0	1325.7	408.3	0.04	0.182	0.235	2.31926e-13	6.25467e-14
ENSG00000099904	0	1798.9	535.1	0	0.112	0.03	0	0
ENSG00000099910	0	1454.8	447.2	0	0.095	0.007	0	0
ENSG00000099917	0	1543.7	658.3	0	0.08	0.043	0	0
ENSG00000099937	0	1110.4	386.6	0.02	0.06	0.316	0.000512125	3.91038e-05
ENSG00000099940	0	574.6	199.4	0.01	0.07	0.175	0.000230054	1.84978e-05
ENSG00000099942	0	622	287	0	0.063	0.001	3.90175e-10	6.94571e-11
ENSG00000099953	0	1072.5	391.5	0.01	0.096	0.131	5.07363e-11	1.00999e-11
ENSG00000099954	0	3070.7	1252.3	0.02	0.098	0.2	0	0
ENSG00000099956	0	918.7	263.3	0.01	0.129	0.052	4.55191e-15	1.52616e-15
ENSG00000099960	0	1429.8	475.2	0.01	0.148	0.084	0	0
ENSG00000099995	0	1618.4	760.6	0	0.066	0.029	0	0
ENSG00000099998	0	321.2	101.8	0.09	0.147	0.618	0.192894	0.0108511
ENSG00000100003	0	890.7	315.3	0.01	0.058	0.117	1.74737e-06	1.8721e-07
ENSG00000100014	0	2326.4	1024.6	0	0.043	0.071	2.88658e-15	9.96626e-16
ENSG00000100023	0	814.8	241.2	0.01	0.127	0.069	1.41775e-12	3.42858e-13
ENSG00000100024	0	857.4	294.6	0.01	0.097	0.112	3.81605e-09	5.92919e-10
ENSG00000100028	0	267.6	110.4	0	0.068	0.001	3.30027e-05	2.97702e-06
ENSG00000100029	0	1266	396	0.01	0.132	0.054	0	0
ENSG00000100030	0	767.4	312.6	0	0.043	0.001	3.50329e-08	4.76792e-09
ENSG00000100034	0	987	375	0.02	0.117	0.156	7.32083e-11	1.42929e-11
ENSG00000100036	0	777.1	272.9	0.01	0.109	0.098	1.07345e-10	2.05998e-11
ENSG00000100038	0	2067.7	518.3	0	0.099	0.035	0	0
ENSG00000100053	0	481.3	151.7	0.02	0.106	0.2	0.000174938	1.42895e-05
ENSG00000100055	0	962.9	201.1	0.01	0.225	0.023	0	0
ENSG00000100056	0	1073.5	354.5	0	0.117	0.024	0	0
ENSG00000100075	0	768.5	164.5	0	0.134	0.03	3.01426e-13	8.00486e-14
ENSG00000100078	0	1163.9	354.1	0.07	0.144	0.5	0.000907255	6.70122e-05
ENSG00000100083	0	1554.7	413.3	0.01	0.1	0.12	6.66134e-14	1.9358e-14
ENSG00000100084	0	2151.9	899.1	0	0.051	0.056	0	0
ENSG00000100095	0	1721.2	519.8	0	0.077	0.061	0	0
ENSG00000100099	0	1518.2	644.8	0.04	0.09	0.485	0.00031894	2.51278e-05
ENSG00000100100	0	611.6	177.4	0.02	0.076	0.227	0.00179708	0.000127789
ENSG00000100104	0	677.8	255.2	0.02	0.071	0.258	0.000538352	4.09438e-05
ENSG00000100105	0	1380.6	437.4	0.01	0.063	0.188	2.01703e-07	2.47372e-08
ENSG00000100106	0	2305.3	805.7	0.03	0.099	0.269	1.04816e-12	2.58354e-13
ENSG00000100109	0	1896.4	614.6	0	0.082	0.006	0	0
ENSG00000100116	0	1000	335	0.02	0.124	0.133	3.37164e-12	7.80491e-13
ENSG00000100122	0	566.4	162.6	0.03	0.115	0.24	0.000123491	1.02826e-05
ENSG00000100124	0	300.8	125.2	0	0.143	0.001	9.70444e-10	1.63926e-10
ENSG00000100129	0	1370.3	318.7	0.03	0.145	0.175	1.19066e-10	2.26705e-11
ENSG00000100146	0	1129.9	268.1	0	0.144	0.012	0	0
ENSG00000100147	0	517.5	169.5	0.01	0.07	0.086	2.48885e-05	2.27828e-06
ENSG00000100151	0	964.7	280.3	0	0.088	0.001	1.11022e-16	4.43952e-17
ENSG00000100154	0	5281.2	2161.8	0	0.073	0.066	0	0
ENSG00000100156	0	1168.3	310.7	0.03	0.148	0.191	8.40387e-11	1.63072e-11
ENSG00000100167	0	762.3	272.7	0	0.059	0.022	9.10563e-09	1.33447e-09
ENSG00000100170	0	1466.4	522.6	0.02	0.074	0.267	3.91103e-07	4.60261e-08
ENSG00000100196	0	495.1	137.9	0.04	0.159	0.249	0.000101926	8.58074e-06
ENSG00000100197	0	1148.3	342.7	0.03	0.176	0.164	7.99361e-15	2.59783e-15
ENSG00000100201	0	1468.3	718.7	0	0.028	0.025	2.98414e-09	4.7077e-10
ENSG00000100206	0	739.6	280.4	0	0.043	0.001	8.17126e-08	1.05398e-08
ENSG00000100207	0	4033.2	1843.8	0.01	0.052	0.146	0	0
ENSG00000100211	0	214.7	85.3	0	0.095	0.051	0.000281851	2.24062e-05
ENSG00000100216	0	305.2	120.8	0	0.084	0.001	1.5164e-06	1.63931e-07
ENSG00000100220	0	1053.1	461.9	0	0.081	0.035	2.33147e-15	8.11873e-16
ENSG00000100221	0	442.4	163.6	0	0.038	0.001	0.000108579	9.11364e-06
ENSG00000100226	0	1528.9	478.1	0	0.053	0.05	3.30758e-12	7.66622e-13
ENSG00000100239	0	2206.9	670.1	0.04	0.142	0.295	3.89577e-13	1.01721e-13
ENSG00000100246	0	259	56	0	0.117	0.001	5.102e-06	5.1292e-07
ENSG00000100263	0	820	338	0.03	0.073	0.465	0.00981127	0.000637143
ENSG00000100271	0	740.9	237.1	0	0.088	0.047	8.64713e-10	1.47155e-10
ENSG00000100280	0	2223.4	623.6	0.01	0.137	0.041	0	0
ENSG00000100281	0	1337.8	465.2	0.01	0.056	0.107	6.41668e-09	9.6007e-10
ENSG00000100284	0	1107.2	368.8	0.01	0.058	0.143	5.93329e-07	6.79954e-08
ENSG00000100294	0	853.8	316.2	0.03	0.112	0.273	3.09491e-06	3.20991e-07
ENSG00000100296	0	1584.4	464.6	0.02	0.117	0.203	5.18171e-11	1.03066e-11
ENSG00000100297	0	1798.3	400.7	0.06	0.222	0.255	1.70974e-14	5.37014e-15
ENSG00000100299	0	1125.7	395.3	0.02	0.116	0.135	3.63154e-13	9.53327e-14
ENSG00000100300	0	409.9	97.1	0.01	0.102	0.076	3.13698e-05	2.83638e-06
ENSG00000100304	0	1574.9	324.1	0.01	0.193	0.051	0	0
ENSG00000100314	0	355.9	91.1	0	0.14	0.001	5.37544e-09	8.15441e-10
ENSG00000100321	0	620.2	78.8	0	0.186	0.018	1.18866e-11	2.56469e-12
ENSG00000100324	0	1152.5	359.5	0	0.175	0.001	0	0
ENSG00000100325	0	1656.4	599.6	0.01	0.069	0.092	8.61533e-14	2.45961e-14
ENSG00000100330	0	2535.8	1058.2	0.01	0.052	0.194	1.12452e-11	2.43205e-12
ENSG00000100335	0	1053.4	380.6	0.01	0.075	0.183	1.69594e-07	2.09967e-08
ENSG00000100344	0	1083.7	359.3	0.04	0.111	0.323	5.37214e-06	5.37711e-07
ENSG00000100347	0	957.9	449.1	0	0.092	0.034	2.22045e-16	8.63792e-17
ENSG00000100348	0	188.3	45.7	0	0.104	0.001	0.000209592	1.69646e-05
ENSG00000100350	0	975.1	239.9	0.01	0.125	0.103	1.77998e-11	3.75406e-12
ENSG00000100351	0	692.6	297.4	0.01	0.079	0.075	1.57785e-08	2.24007e-09
ENSG00000100353	0	1201.9	442.1	0	0.067	0.001	1.11022e-16	4.43952e-17
ENSG00000100354	0	3596.4	1563.6	0.01	0.027	0.203	5.83952e-09	8.79086e-10
ENSG00000100359	0	1650.6	434.4	0.02	0.147	0.113	0	0
ENSG00000100362	0	207.8	65.2	0.01	0.069	0.216	0.0762108	0.00447606
ENSG00000100372	0	656.5	264.5	0.01	0.065	0.169	5.07084e-05	4.44893e-06
ENSG00000100379	0	747.6	194.4	0	0.067	0.06	5.91998e-07	6.78642e-08
ENSG00000100380	0	818.7	288.3	0.01	0.068	0.207	0.000121577	1.01324e-05
ENSG00000100387	0	237.2	77.8	0.04	0.169	0.261	0.00738637	0.00048769
ENSG00000100393	0	4881.4	2360.6	0	0.044	0.089	0	0
ENSG00000100395	0	1600	515	0.01	0.073	0.087	4.81837e-14	1.42806e-14
ENSG00000100399	0	1076.5	246.5	0.02	0.098	0.248	6.58167e-06	6.50311e-07
ENSG00000100401	0	1286.5	471.5	0.01	0.121	0.116	3.33067e-16	1.27132e-16
ENSG00000100403	0	2368.5	508.5	0.05	0.212	0.244	0	0
ENSG00000100410	0	241.3	61.7	0	0.087	0.001	0.000111489	9.34609e-06
ENSG00000100412	0	1804.8	535.2	0	0.103	0.044	0	0
ENSG00000100413	0	468.1	143.9	0	0.093	0.023	8.30719e-08	1.07056e-08
ENSG00000100416	0	901.5	361.5	0.02	0.114	0.191	5.35968e-09	8.13217e-10
ENSG00000100418	0	365.7	138.3	0	0.061	0.001	5.5346e-06	5.52972e-07
ENSG00000100422	0	1202	409	0.01	0.136	0.056	0	0
ENSG00000100425	0	2782.8	781.2	0.02	0.133	0.185	0	0
ENSG00000100426	0	2626.6	886.4	0.01	0.11	0.075	0	0
ENSG00000100427	0	848.3	282.7	0.01	0.119	0.124	1.10831e-10	2.1213e-11
ENSG00000100429	0	1424.1	582.9	0.02	0.097	0.235	2.36295e-10	4.33746e-11
ENSG00000100433	0	1187.4	429.6	0	0.082	0.042	1.33227e-15	4.79232e-16
ENSG00000100439	0	717.8	308.2	0.01	0.08	0.089	1.5806e-08	2.24309e-09
ENSG00000100445	0	613	227	0.04	0.087	0.507	0.0477321	0.00286093
ENSG00000100462	0	1377.9	482.1	0.01	0.089	0.146	3.95659e-11	8.00051e-12
ENSG00000100479	0	1206.7	356.3	0.05	0.132	0.396	0.000115497	9.6643e-06
ENSG00000100483	0	497	190	0.01	0.079	0.18	0.00023313	1.87308e-05
ENSG00000100485	0	2910.9	1082.1	0	0.041	0.111	3.78586e-14	1.13634e-14
ENSG00000100490	0	723.2	350.8	0.01	0.057	0.15	1.43876e-05	1.36332e-06
ENSG00000100503	0	4524.9	1868.1	0.02	0.061	0.253	1.11022e-16	4.43952e-17
ENSG00000100504	0	1811.4	729.6	0.01	0.063	0.09	8.43769e-15	2.73607e-15
ENSG00000100505	0	1812	594	0	0.074	0.061	0	0
ENSG00000100523	0	1938.2	758.8	0.01	0.069	0.098	2.22045e-16	8.63792e-17
ENSG00000100526	0	467.2	168.8	0	0.019	0.228	0.108454	0.00626703
ENSG00000100528	0	275.5	156.5	0	0.035	0.001	0.00128771	9.31822e-05
ENSG00000100532	0	704.1	291.9	0.01	0.04	0.183	0.00143081	0.000102895
ENSG00000100554	0	565.9	175.1	0	0.071	0.001	1.18007e-08	1.70448e-09
ENSG00000100558	0	778.2	280.8	0.01	0.065	0.123	2.32983e-06	2.45828e-07
ENSG00000100564	0	406.2	157.8	0	0.046	0.054	0.000477428	3.66723e-05
ENSG00000100565	0	660.8	194.2	0.09	0.181	0.521	0.0116646	0.000750033
ENSG00000100567	0	569.1	195.9	0	0.058	0.001	1.12721e-07	1.42772e-08
ENSG00000100580	0	729.1	242.9	0.04	0.114	0.336	0.00109971	8.03581e-05
ENSG00000100591	0	693.6	320.4	0	0.038	0.038	5.58527e-06	5.57668e-07
ENSG00000100592	0	2184.1	1049.9	0	0.037	0.099	4.7875e-12	1.08353e-12
ENSG00000100596	0	1118.3	450.7	0.01	0.067	0.152	4.14235e-08	5.58254e-09
ENSG00000100600	0	859.5	331.5	0.01	0.107	0.067	6.25611e-13	1.5892e-13
ENSG00000100601	0	872.1	285.9	0.07	0.1	0.677	0.160343	0.00909844
ENSG00000100612	0	766.5	292.5	0.09	0.151	0.569	0.014148	0.000900361
ENSG00000100614	0	772.7	373.3	0	0.016	0.001	0.000255052	2.03911e-05
ENSG00000100625	0	1671.1	668.9	0.01	0.041	0.239	7.78269e-06	7.60545e-07
ENSG00000100626	0	1279.3	394.7	0.01	0.106	0.053	0	0
ENSG00000100644	0	1855	626	0.01	0.04	0.257	2.78089e-05	2.5307e-06
ENSG00000100647	0	601.4	307.6	0.01	0.03	0.278	0.0196076	0.00122633
ENSG00000100650	0	594.8	221.2	0	0.023	0.001	0.000345432	2.70776e-05
ENSG00000100652	0	786.2	260.8	0.02	0.082	0.23	9.89914e-05	8.34918e-06
ENSG00000100664	0	806.1	330.9	0.01	0.064	0.079	9.27179e-08	1.18879e-08
ENSG00000100665	0	942.2	338.8	0.02	0.08	0.222	3.52758e-06	3.62623e-07
ENSG00000100678	0	2080.2	694.8	0.02	0.113	0.161	1.11022e-16	4.43952e-17
ENSG00000100697	0	4133.6	1626.4	0	0.039	0.063	0	0
ENSG00000100711	0	482.6	135.4	0.01	0.048	0.308	0.0467355	0.0028035
ENSG00000100714	0	2064	801	0.02	0.057	0.396	4.52492e-05	4.00023e-06
ENSG00000100722	0	1561.6	646.4	0	0.053	0.036	9.54792e-15	3.08104e-15
ENSG00000100726	0	1966.8	544.2	0.03	0.135	0.204	5.55111e-16	2.07019e-16
ENSG00000100731	0	5062.5	1960.5	0.01	0.051	0.111	0	0
ENSG00000100739	0	640.2	223.8	0.03	0.111	0.296	0.000163437	1.3386e-05
ENSG00000100744	0	301.8	115.2	0	0.17	0.001	7.90706e-11	1.53881e-11
ENSG00000100749	0	869.7	318.3	0.01	0.04	0.204	0.000928068	6.84387e-05
ENSG00000100767	0	2751.7	953.3	0.03	0.112	0.247	0	0
ENSG00000100784	0	1766.1	639.9	0	0.084	0.027	0	0
ENSG00000100796	0	1723.3	718.7	0	0.026	0.022	2.39688e-09	3.83006e-10
ENSG00000100804	0	562.8	226.2	0	0.07	0.051	2.53324e-07	3.06157e-08
ENSG00000100811	0	792.5	221.5	0.1	0.205	0.5	0.00349126	0.000239743
ENSG00000100813	0	2890.7	1129.3	0.01	0.034	0.237	1.14628e-07	1.45062e-08
ENSG00000100814	0	567.1	263.9	0.01	0.02	0.361	0.137185	0.00783978
ENSG00000100815	0	4260.8	1505.2	0.01	0.042	0.345	8.0382e-08	1.03809e-08
ENSG00000100823	0	684.3	269.7	0.01	0.063	0.142	2.09195e-05	1.93606e-06
ENSG00000100842	0	1097.9	585.1	0.02	0.072	0.315	8.36792e-06	8.14683e-07
ENSG00000100852	0	3410	1096	0	0.047	0.062	0	0
ENSG00000100883	0	1114.2	397.8	0	0.052	0.001	1.40754e-12	3.40614e-13
ENSG00000100888	0	4931.6	1971.4	0	0.049	0.042	0	0
ENSG00000100897	0	1210	428	0.01	0.059	0.085	1.21789e-09	2.02218e-10
ENSG00000100906	0	685.1	265.9	0	0.08	0.019	1.40009e-10	2.63899e-11
ENSG00000100908	0	418.3	205.7	0.01	0.02	0.251	0.0995384	0.00577328
ENSG00000100911	0	504.9	212.1	0	0.029	0.071	0.0028072	0.000194894
ENSG00000100916	0	815.1	153.9	0.01	0.076	0.143	0.00058969	4.46484e-05
ENSG00000100934	0	1655.8	639.2	0	0.027	0.023	4.02072e-09	6.22601e-10
ENSG00000100938	0	887.8	336.2	0.01	0.054	0.196	9.27525e-05	7.84926e-06
ENSG00000100941	0	1453.7	520.3	0.01	0.044	0.125	1.61283e-07	2.00152e-08
ENSG00000100949	0	1204.2	478.8	0.01	0.054	0.162	3.59855e-07	4.25405e-08
ENSG00000100968	0	1810.6	754.4	0.04	0.093	0.461	3.27647e-05	2.95702e-06
ENSG00000100979	0	1146.1	332.9	0.03	0.161	0.185	1.59728e-12	3.83859e-13
ENSG00000100982	0	1634.2	447.8	0.06	0.194	0.313	1.15742e-10	2.21008e-11
ENSG00000100983	0	1031.7	384.3	0.04	0.071	0.515	0.0201313	0.00125726
ENSG00000100987	0	802	263	0.02	0.102	0.2	6.51525e-07	7.4176e-08
ENSG00000100991	0	1555.1	670.9	0	0.054	0.025	3.33067e-16	1.27132e-16
ENSG00000100994	0	2042.1	486.9	0	0.151	0.023	0	0
ENSG00000100997	0	837.6	359.4	0.01	0.071	0.086	4.83644e-09	7.39115e-10
ENSG00000101003	0	425.9	162.1	0.01	0.08	0.089	3.30631e-05	2.98211e-06
ENSG00000101004	0	3108.1	1019.9	0.06	0.128	0.485	9.08102e-08	1.16535e-08
ENSG00000101019	0	671.1	222.9	0.03	0.061	0.434	0.0437596	0.00263255
ENSG00000101040	0	2294.1	942.9	0.01	0.052	0.102	5.66214e-15	1.87262e-15
ENSG00000101049	0	939.4	338.6	0.01	0.099	0.133	4.8679e-10	8.54895e-11
ENSG00000101052	0	937.3	373.7	0	0.06	0.054	4.47607e-09	6.86708e-10
ENSG00000101057	0	1637.9	459.1	0.02	0.154	0.101	0	0
ENSG00000101076	0	1086.6	308.4	0	0.134	0.014	0	0
ENSG00000101096	0	2112.4	605.6	0.03	0.137	0.207	4.44089e-16	1.67323e-16
ENSG00000101098	0	647.8	159.2	0	0.154	0.01	1.55431e-15	5.54463e-16
ENSG00000101104	0	1397.5	444.5	0.01	0.1	0.051	0	0
ENSG00000101109	0	1088.4	351.6	0.02	0.072	0.249	4.40934e-05	3.90514e-06
ENSG00000101115	0	2269.1	889.9	0.01	0.065	0.146	3.33067e-15	1.13919e-15
ENSG00000101126	0	2408.8	897.2	0	0.056	0.037	0	0
ENSG00000101144	0	1090.5	202.5	0	0.089	0.001	1.9984e-15	7.02589e-16
ENSG00000101146	0	828.2	275.8	0.04	0.16	0.228	9.42329e-08	1.20525e-08
ENSG00000101152	0	495.4	98.6	0	0.195	0.001	5.10703e-15	1.69748e-15
ENSG00000101158	0	1290.2	455.8	0.02	0.102	0.228	1.22166e-08	1.75969e-09
ENSG00000101181	0	885.8	332.2	0.04	0.087	0.411	0.00146649	0.000105337
ENSG00000101182	0	465.9	179.1	0	0.07	0.031	4.08808e-06	4.16605e-07
ENSG00000101188	0	900.6	107.4	0.01	0.225	0.025	1.11022e-16	4.43952e-17
ENSG00000101189	0	363	108	0.01	0.081	0.102	0.000482907	3.70588e-05
ENSG00000101191	0	4656.8	2054.2	0.02	0.098	0.166	0	0
ENSG00000101193	0	522.5	161.5	0	0.052	0.001	5.26925e-06	5.28425e-07
ENSG00000101194	0	1065.9	242.1	0.06	0.209	0.269	6.26859e-09	9.3942e-10
ENSG00000101197	0	672.1	221.9	0.04	0.138	0.289	2.93877e-05	2.66674e-06
ENSG00000101198	0	467.6	156.4	0.07	0.127	0.518	0.0483821	0.00289775
ENSG00000101199	0	953.2	288.8	0.01	0.096	0.147	1.81715e-08	2.5594e-09
ENSG00000101213	0	908.9	177.1	0.02	0.204	0.108	7.39964e-13	1.86156e-13
ENSG00000101216	0	1249.9	337.1	0.03	0.216	0.157	0	0
ENSG00000101220	0	382.3	139.7	0	0.144	0.001	2.25243e-11	4.69626e-12
ENSG00000101222	0	498.3	125.7	0.03	0.19	0.18	2.02467e-06	2.15121e-07
ENSG00000101224	0	1339.3	370.7	0.05	0.122	0.396	4.1527e-05	3.69397e-06
ENSG00000101230	0	963.3	290.7	0.01	0.07	0.136	6.39634e-07	7.29472e-08
ENSG00000101236	0	327.4	110.6	0.04	0.113	0.336	0.0274208	0.00168755
ENSG00000101246	0	493.1	109.9	0	0.118	0.036	5.26674e-08	6.99463e-09
ENSG00000101247	0	759.2	275.8	0.02	0.093	0.187	1.69432e-06	1.81873e-07
ENSG00000101265	0	761.9	216.1	0.05	0.17	0.311	1.43331e-05	1.35869e-06
ENSG00000101276	0	1116.2	290.8	0.01	0.134	0.105	6.78346e-14	1.96972e-14
ENSG00000101280	0	1196.2	312.8	0.02	0.103	0.216	1.15199e-07	1.45734e-08
ENSG00000101290	0	972.6	305.4	0.08	0.16	0.486	0.00123497	8.95877e-05
ENSG00000101294	0	925	257	0	0.077	0.029	1.86265e-11	3.92163e-12
ENSG00000101298	0	1291.2	322.8	0.01	0.149	0.042	0	0
ENSG00000101310	0	1614.5	683.5	0	0.052	0.048	3.16414e-14	9.59982e-15
ENSG00000101311	0	1404.9	626.1	0.01	0.072	0.121	2.55074e-12	5.99004e-13
ENSG00000101321	0	1441.3	292.7	0.01	0.116	0.124	7.21645e-13	1.82049e-13
ENSG00000101323	0	763.7	346.3	0.01	0.067	0.08	2.06383e-08	2.88681e-09
ENSG00000101327	0	584.5	174.5	0.02	0.073	0.288	0.00397488	0.000271143
ENSG00000101333	0	1608.6	557.4	0	0.06	0.031	6.10623e-15	2.00948e-15
ENSG00000101335	0	398.5	90.5	0	0.073	0.001	8.23377e-06	8.02479e-07
ENSG00000101336	0	1172.2	342.8	0.01	0.112	0.078	3.88578e-15	1.3155e-15
ENSG00000101337	0	1418.5	456.5	0	0.074	0.001	0	0
ENSG00000101343	0	1418.4	642.6	0	0.049	0.029	3.35065e-13	8.84357e-14
ENSG00000101347	0	1370.9	507.1	0.03	0.056	0.58	0.0426903	0.0025697
ENSG00000101349	0	1549.2	607.8	0	0.065	0.05	5.55111e-16	2.07019e-16
ENSG00000101350	0	1661.5	579.5	0	0.063	0.01	0	0
ENSG00000101361	0	1140.8	434.2	0.01	0.04	0.132	6.91019e-06	6.81113e-07
ENSG00000101363	0	185.1	69.9	0	0.03	0.001	0.0225772	0.00140293
ENSG00000101365	0	858	297	0.01	0.069	0.103	1.12006e-07	1.41965e-08
ENSG00000101367	0	601.7	202.3	0.01	0.064	0.104	4.64497e-05	4.1009e-06
ENSG00000101384	0	2893.6	760.4	0.02	0.117	0.162	0	0
ENSG00000101391	0	1302.1	500.9	0.03	0.093	0.361	1.9546e-05	1.81746e-06
ENSG00000101400	0	1151.8	363.2	0.02	0.076	0.25	5.05776e-06	5.08613e-07
ENSG00000101407	0	2161.2	1105.8	0.02	0.056	0.276	4.30355e-09	6.62745e-10
ENSG00000101412	0	1022.6	288.4	0.02	0.086	0.182	1.10392e-06	1.21772e-07
ENSG00000101413	0	669.5	308.5	0	0.022	0.001	0.000132931	1.10273e-05
ENSG00000101417	0	295.9	88.1	0.03	0.099	0.285	0.0172387	0.00108571
ENSG00000101421	0	480.6	191.4	0	0.043	0.048	0.000213571	1.72656e-05
ENSG00000101438	0	1339.1	235.9	0	0.166	0.018	0	0
ENSG00000101442	0	1259.3	561.7	0.01	0.061	0.133	1.79848e-09	2.92503e-10
ENSG00000101444	0	1007.4	288.6	0.02	0.119	0.146	4.1513e-10	7.35233e-11
ENSG00000101447	0	1268.3	480.7	0.01	0.099	0.131	1.59872e-13	4.40085e-14
ENSG00000101452	0	1467.9	641.1	0.01	0.044	0.189	7.21361e-07	8.14667e-08
ENSG00000101457	0	699.6	287.4	0	0.068	0.043	8.91994e-09	1.30804e-09
ENSG00000101460	0	305.8	36.2	0.01	0.197	0.07	0.00024241	1.94422e-05
ENSG00000101463	0	629.1	144.9	0	0.094	0.052	8.38669e-08	1.08005e-08
ENSG00000101464	0	864.4	440.6	0	0.039	0.09	4.2545e-06	4.32419e-07
ENSG00000101470	0	403.9	76.1	0	0.095	0.001	1.66583e-06	1.7892e-07
ENSG00000101473	0	727.9	229.1	0.01	0.043	0.226	0.00416529	0.000283576
ENSG00000101474	0	853.2	394.8	0.01	0.072	0.1	4.8867e-09	7.45634e-10
ENSG00000101489	0	1045.6	289.4	0	0.057	0.001	6.74127e-12	1.50107e-12
ENSG00000101493	0	2767.1	721.9	0.01	0.125	0.092	0	0
ENSG00000101544	0	2325.3	1049.7	0.01	0.088	0.095	0	0
ENSG00000101557	0	1120.6	358.4	0	0.036	0.001	7.97141e-09	1.17722e-09
ENSG00000101574	0	1068.4	347.6	0.02	0.052	0.296	0.00103417	7.57965e-05
ENSG00000101577	0	1903.9	784.1	0.01	0.077	0.083	0	0
ENSG00000101605	0	3530	1501	0.01	0.073	0.206	0	0
ENSG00000101608	0	384.8	146.2	0.01	0.112	0.046	5.96302e-07	6.83255e-08
ENSG00000101624	0	1459	518	0	0.068	0.04	6.66134e-16	2.46161e-16
ENSG00000101639	0	4182	1620	0.03	0.081	0.349	1.74305e-14	5.46067e-15
ENSG00000101654	0	1158.9	350.1	0.04	0.07	0.519	0.0235767	0.00146281
ENSG00000101665	0	1008.6	269.4	0.03	0.097	0.319	0.000214393	1.73282e-05
ENSG00000101670	0	1088.3	411.7	0.01	0.077	0.161	2.13004e-08	2.97373e-09
ENSG00000101745	0	4683.1	1487.9	0.01	0.052	0.165	0	0
ENSG00000101751	0	1629	510	0.02	0.044	0.511	0.0222934	0.00138613
ENSG00000101773	0	371.1	108.9	0.02	0.019	1.02	0.980588	0.0514244
ENSG00000101782	0	621.9	191.1	0	0.071	0.022	8.14928e-08	1.05151e-08
ENSG00000101811	0	1159.1	571.9	0	0.053	0.033	1.24867e-12	3.04997e-13
ENSG00000101825	0	5997.2	2486.8	0.02	0.072	0.333	0	0
ENSG00000101849	0	1236.8	470.2	0	0.101	0.041	0	0
ENSG00000101850	0	862	350	0.02	0.075	0.245	2.06042e-05	1.90881e-06
ENSG00000101856	0	443	142	0	0.053	0.086	0.000688214	5.15895e-05
ENSG00000101868	0	3108.5	1253.5	0.01	0.03	0.366	5.61779e-05	4.90231e-06
ENSG00000101871	0	1435.6	565.4	0	0.052	0.014	1.0103e-14	3.25585e-15
ENSG00000101882	0	896.9	348.1	0.01	0.048	0.139	1.77263e-05	1.65712e-06
ENSG00000101888	0	430.3	160.7	0.04	0.022	1.97	0.255337	0.0141901
ENSG00000101892	0	728.7	342.3	0.01	0.04	0.174	0.000529531	4.03359e-05
ENSG00000101901	0	929.9	363.1	0.02	0.044	0.344	0.00566175	0.000379654
ENSG00000101916	0	2349.1	824.9	0.02	0.052	0.305	1.78771e-06	1.91223e-07
ENSG00000101935	0	709.4	289.6	0	0.014	0.001	0.00183892	0.000130573
ENSG00000101945	0	991.8	244.2	0.01	0.081	0.064	2.05153e-09	3.30276e-10
ENSG00000101955	0	975.8	413.2	0	0.048	0.065	3.70277e-08	5.0179e-09
ENSG00000101972	0	319.7	67.3	0	0.033	0.001	0.00858677	0.000562575
ENSG00000101974	0	2382.8	1013.2	0	0.031	0.15	9.49975e-09	1.3875e-09
ENSG00000101977	0	2270.2	936.8	0.01	0.039	0.287	4.24844e-06	4.31983e-07
ENSG00000101981	0	1007.9	375.1	0.01	0.045	0.294	0.00157742	0.000112894
ENSG00000101986	0	1804.3	430.7	0.01	0.153	0.071	0	0
ENSG00000101997	0	1390.7	490.3	0.01	0.057	0.13	6.8487e-09	1.02112e-09
ENSG00000102001	0	4258.5	1270.5	0.04	0.119	0.351	1.9984e-15	7.02589e-16
ENSG00000102003	0	730.9	208.1	0	0.051	0.055	6.05395e-06	6.01914e-07
ENSG00000102007	0	330.4	125.6	0.01	0.05	0.122	0.00511828	0.000345016
ENSG00000102024	0	1254.6	635.4	0	0.022	0.001	4.77972e-08	6.38613e-09
ENSG00000102030	0	511.5	193.5	0	0.033	0.001	6.83555e-05	5.88692e-06
ENSG00000102032	0	941.3	309.7	0.02	0.111	0.217	1.55371e-07	1.93175e-08
ENSG00000102034	0	1451.9	516.1	0.12	0.218	0.536	3.11553e-05	2.81803e-06
ENSG00000102043	0	1529.6	582.4	0.01	0.029	0.497	0.0453084	0.00272236
ENSG00000102053	0	1748.9	576.1	0.02	0.07	0.32	1.97479e-05	1.83507e-06
ENSG00000102054	0	1042.9	364.1	0	0.038	0.076	4.5037e-06	4.56034e-07
ENSG00000102057	0	1468.9	472.1	0	0.096	0.043	0	0
ENSG00000102081	0	1483.4	409.6	0.05	0.089	0.617	0.044554	0.00267879
ENSG00000102098	0	1480.1	598.9	0.01	0.043	0.257	3.34005e-05	3.01054e-06
ENSG00000102100	0	836	340	0.01	0.072	0.139	2.35591e-07	2.86288e-08
ENSG00000102103	0	576.2	218.8	0	0.069	0.05	5.60728e-07	6.45202e-08
ENSG00000102104	0	487.1	184.9	0	0.068	0.001	3.41052e-08	4.64771e-09
ENSG00000102125	0	626.1	204.9	0.01	0.069	0.141	4.93107e-05	4.33567e-06
ENSG00000102158	0	777.7	227.3	0.09	0.141	0.607	0.0762752	0.00447948
ENSG00000102172	0	726	339	0	0.053	0.053	2.34229e-07	2.84827e-08
ENSG00000102174	0	1662.7	584.3	0.01	0.052	0.118	2.74454e-09	4.35133e-10
ENSG00000102181	0	545.1	237.9	0.02	0.058	0.392	0.0244784	0.00151579
ENSG00000102189	0	3242.7	984.3	0.02	0.06	0.261	3.09132e-09	4.86761e-10
ENSG00000102218	0	809.4	240.6	0.01	0.05	0.099	5.65451e-05	4.93318e-06
ENSG00000102221	0	1737.4	731.6	0.01	0.032	0.165	2.74065e-06	2.86814e-07
ENSG00000102225	0	1003.5	301.5	0	0.065	0.066	9.84827e-09	1.43525e-09
ENSG00000102226	0	2110.2	778.8	0.01	0.067	0.08	0	0
ENSG00000102230	0	744.6	362.4	0	0.047	0.029	6.02333e-08	7.92897e-09
ENSG00000102241	0	1644	618	0.01	0.052	0.237	3.73133e-06	3.81902e-07
ENSG00000102243	0	536.9	237.1	0.02	0.082	0.236	0.000323004	2.54205e-05
ENSG00000102271	0	1610	535	0.04	0.109	0.342	6.2725e-07	7.16132e-08
ENSG00000102302	0	2118.1	764.9	0.01	0.051	0.104	3.62266e-13	9.51337e-14
ENSG00000102312	0	1053.8	323.2	0.05	0.165	0.31	3.15955e-07	3.7631e-08
ENSG00000102313	0	2749.1	1186.9	0.03	0.06	0.54	0.000315547	2.48684e-05
ENSG00000102359	0	1013.1	375.9	0.03	0.103	0.261	2.24438e-06	2.37223e-07
ENSG00000102362	0	1455.9	557.1	0.01	0.037	0.152	3.11682e-06	3.2308e-07
ENSG00000102383	0	721.8	289.2	0	0.015	0.287	0.115597	0.00666554
ENSG00000102385	0	2017.1	844.9	0	0.048	0.052	7.77156e-16	2.85455e-16
ENSG00000102387	0	951.1	434.9	0.04	0.036	1.103	0.760862	0.0403826
ENSG00000102393	0	945.7	341.3	0.01	0.044	0.2	0.000622698	4.6982e-05
ENSG00000102452	0	3809.2	1386.8	0.01	0.114	0.122	0	0
ENSG00000102466	0	547.1	208.9	0	0.025	0.001	0.000419069	3.24718e-05
ENSG00000102468	0	1024.3	388.7	0	0.063	0.047	1.25585e-10	2.38557e-11
ENSG00000102471	0	702.7	305.3	0.01	0.061	0.235	0.000261983	2.09064e-05
ENSG00000102524	0	569.1	285.9	0.02	0.032	0.682	0.401158	0.0218974
ENSG00000102531	0	2744.4	843.6	0.01	0.069	0.212	5.87064e-12	1.31643e-12
ENSG00000102539	0	999.6	236.4	0.03	0.133	0.207	4.67683e-08	6.25668e-09
ENSG00000102547	0	673.2	328.8	0	0.065	0.047	1.93493e-08	2.71535e-09
ENSG00000102554	0	948.2	419.8	0.01	0.043	0.125	7.01479e-06	6.90863e-07
ENSG00000102572	0	964.3	364.7	0	0.088	0.024	4.77396e-15	1.59768e-15
ENSG00000102575	0	726.8	248.2	0.01	0.087	0.115	1.29387e-07	1.62537e-08
ENSG00000102580	0	1075.4	436.6	0	0.07	0.053	7.10354e-12	1.57758e-12
ENSG00000102595	0	3533.3	1014.7	0.03	0.082	0.37	9.16886e-09	1.34212e-09
ENSG00000102606	0	1820.1	579.9	0.04	0.117	0.368	1.87501e-07	2.31078e-08
ENSG00000102683	0	582.9	290.1	0.03	0.079	0.436	0.0119154	0.000765886
ENSG00000102710	0	1412	427	0.01	0.062	0.16	2.66417e-07	3.21025e-08
ENSG00000102743	0	643	260	0	0.107	0.015	1.01808e-13	2.87395e-14
ENSG00000102753	0	1184.5	375.5	0.04	0.084	0.486	0.00964586	0.00062707
ENSG00000102755	0	2883.2	1130.8	0.01	0.053	0.222	1.3226e-11	2.83776e-12
ENSG00000102760	0	296.6	114.4	0.02	0.055	0.388	0.116454	0.00671231
ENSG00000102763	0	3116.5	1185.5	0.01	0.07	0.125	0	0
ENSG00000102780	0	2723.9	924.1	0.05	0.14	0.337	3.03646e-13	8.0609e-14
ENSG00000102781	0	1088.4	381.6	0.01	0.054	0.105	6.20193e-07	7.08962e-08
ENSG00000102796	0	693.2	257.8	0.07	0.098	0.674	0.161705	0.00917286
ENSG00000102804	0	2231.5	951.5	0.02	0.042	0.497	0.00303302	0.000209616
ENSG00000102805	0	770.8	303.2	0.03	0.067	0.41	0.00928796	0.000605042
ENSG00000102837	0	1105	425	0.03	0.077	0.407	0.000762593	5.69605e-05
ENSG00000102870	0	2195.2	411.8	0.01	0.144	0.078	0	0
ENSG00000102871	0	728.4	195.6	0.01	0.104	0.138	3.58419e-07	4.23777e-08
ENSG00000102878	0	1103.4	363.6	0.02	0.086	0.279	9.62037e-06	9.30174e-07
ENSG00000102882	0	775	203	0.01	0.078	0.069	1.28229e-07	1.61241e-08
ENSG00000102886	0	714.8	239.2	0.02	0.085	0.291	0.00042872	3.31617e-05
ENSG00000102890	0	1433.7	369.3	0.03	0.215	0.135	0	0
ENSG00000102893	0	2472.3	806.7	0.01	0.077	0.165	7.54952e-15	2.45898e-15
ENSG00000102898	0	275.6	105.4	0.01	0.041	0.181	0.0507511	0.00303218
ENSG00000102900	0	1877.4	543.6	0.07	0.202	0.335	5.12774e-11	1.02021e-11
ENSG00000102901	0	1184.2	489.8	0.09	0.11	0.778	0.192344	0.0108218
ENSG00000102908	0	3176.3	1413.7	0	0.034	0.085	2.10942e-15	7.39487e-16
ENSG00000102910	0	1308.2	476.8	0.04	0.106	0.346	5.0327e-06	5.06441e-07
ENSG00000102921	0	1869.5	818.5	0.01	0.041	0.228	7.11252e-07	8.04494e-08
ENSG00000102924	0	467.6	111.4	0.01	0.066	0.098	0.000448415	3.45643e-05
ENSG00000102935	0	2747.1	585.9	0.01	0.197	0.03	0	0
ENSG00000102967	0	832.1	352.9	0.01	0.095	0.146	6.88375e-09	1.02572e-09
ENSG00000102974	0	1672.2	508.8	0.04	0.085	0.498	0.0034724	0.00023856
ENSG00000102978	0	642.1	182.9	0	0.088	0.001	4.93017e-11	9.83575e-12
ENSG00000102981	0	740.8	291.2	0.01	0.07	0.079	4.53347e-08	6.07714e-09
ENSG00000102984	0	824.5	285.5	0.01	0.078	0.082	3.01657e-08	4.13708e-09
ENSG00000102996	0	1587	420	0.01	0.136	0.071	0	0
ENSG00000103005	0	388.5	115.5	0.02	0.085	0.218	0.00358131	0.000245604
ENSG00000103018	0	317.1	132.9	0.01	0.048	0.204	0.0238631	0.00148007
ENSG00000103024	0	402.2	65.8	0	0.219	0.011	1.05282e-10	2.02306e-11
ENSG00000103034	0	900	237	0	0.094	0.036	6.32983e-12	1.41246e-12
ENSG00000103035	0	689.7	276.3	0	0.066	0.022	6.21127e-09	9.31786e-10
ENSG00000103037	0	1040.7	378.3	0.02	0.088	0.196	9.95502e-08	1.26971e-08
ENSG00000103042	0	1062.9	323.1	0.01	0.082	0.082	1.14538e-10	2.18771e-11
ENSG00000103043	0	1827.1	518.9	0	0.076	0.03	0	0
ENSG00000103044	0	1307.6	351.4	0	0.113	0.021	0	0
ENSG00000103051	0	1602.3	482.7	0.01	0.084	0.068	2.22045e-16	8.63792e-17
ENSG00000103056	0	1489.2	379.8	0	0.146	0.028	0	0
ENSG00000103061	0	352.4	106.6	0.01	0.083	0.104	0.001324	9.56286e-05
ENSG00000103064	0	768.5	251.5	0.09	0.201	0.448	0.000314787	2.48247e-05
ENSG00000103066	0	933.4	302.6	0.01	0.048	0.114	7.75843e-06	7.58497e-07
ENSG00000103067	0	1530.2	644.8	0.01	0.09	0.089	0	0
ENSG00000103089	0	907	209	0.01	0.08	0.126	1.23651e-06	1.35234e-07
ENSG00000103091	0	2087.6	786.4	0	0.101	0.039	0	0
ENSG00000103111	0	1127.4	513.6	0.01	0.056	0.212	2.36017e-06	2.48886e-07
ENSG00000103126	0	2012.8	570.2	0.04	0.2	0.215	0	0
ENSG00000103148	0	1171.2	412.8	0.01	0.103	0.086	6.88338e-15	2.25812e-15
ENSG00000103150	0	1154.4	324.6	0.02	0.117	0.145	2.53367e-11	5.24521e-12
ENSG00000103152	0	622	230	0.02	0.088	0.248	0.000149349	1.2308e-05
ENSG00000103154	0	744.6	218.4	0.03	0.179	0.141	4.96875e-11	9.90461e-12
ENSG00000103160	0	695.7	294.3	0.01	0.069	0.086	1.90462e-07	2.34411e-08
ENSG00000103168	0	1887.9	710.1	0.04	0.13	0.298	1.46927e-12	3.54378e-13
ENSG00000103174	0	1215.3	329.7	0.02	0.105	0.195	6.98397e-09	1.03959e-09
ENSG00000103187	0	347.4	78.6	0	0.065	0.047	0.000760718	5.68321e-05
ENSG00000103194	0	1687.5	706.5	0.01	0.054	0.191	1.67245e-08	2.36609e-09
ENSG00000103196	0	1149.8	338.2	0.01	0.135	0.087	1.11022e-16	4.43952e-17
ENSG00000103197	0	4254.4	1166.6	0.01	0.15	0.061	0	0
ENSG00000103248	0	827.6	315.4	0.03	0.097	0.338	0.000140452	1.16194e-05
ENSG00000103254	0	384.5	110.5	0.02	0.146	0.129	9.36266e-06	9.06216e-07
ENSG00000103257	0	887	157	0.01	0.164	0.064	1.36669e-13	3.79789e-14
ENSG00000103264	0	1332.9	284.1	0.01	0.195	0.039	0	0
ENSG00000103266	0	563.2	129.8	0	0.202	0.001	1.11022e-16	4.43952e-17
ENSG00000103269	0	890.8	219.2	0.01	0.086	0.122	1.7886e-07	2.20764e-08
ENSG00000103274	0	714.5	242.5	0.11	0.203	0.542	0.0111392	0.000718207
ENSG00000103275	0	386.7	162.3	0.02	0.06	0.393	0.058213	0.00345792
ENSG00000103316	0	674.9	267.1	0	0.059	0.051	2.41707e-07	2.93135e-08
ENSG00000103319	0	1667.4	507.6	0.01	0.097	0.113	7.77156e-16	2.85455e-16
ENSG00000103342	0	1139.7	339.3	0.03	0.113	0.304	8.73904e-06	8.49118e-07
ENSG00000103351	0	870.6	425.4	0.01	0.052	0.177	1.73799e-05	1.62661e-06
ENSG00000103353	0	705.8	221.2	0	0.052	0.055	4.30089e-06	4.36881e-07
ENSG00000103356	0	1192.4	406.6	0.03	0.096	0.361	3.46007e-05	3.11426e-06
ENSG00000103365	0	1251.9	470.1	0.07	0.151	0.45	2.40602e-05	2.20604e-06
ENSG00000103375	0	576.2	206.8	0.02	0.135	0.148	5.35122e-08	7.09393e-09
ENSG00000103381	0	695.7	177.3	0.02	0.19	0.111	2.28324e-11	4.75506e-12
ENSG00000103404	0	2596.4	1129.6	0.01	0.072	0.126	0	0
ENSG00000103415	0	705	243	0	0.07	0.062	1.09688e-07	1.39197e-08
ENSG00000103429	0	959.7	390.3	0.01	0.045	0.19	9.36959e-05	7.9245e-06
ENSG00000103449	0	2410.5	1036.5	0.01	0.03	0.256	4.57442e-06	4.62875e-07
ENSG00000103460	0	963	654	0	0.024	0.093	5.81667e-05	5.06497e-06
ENSG00000103494	0	2629.6	1075.4	0.01	0.036	0.371	7.84076e-05	6.69189e-06
ENSG00000103495	0	818	193	0.01	0.069	0.114	1.28505e-05	1.22291e-06
ENSG00000103496	0	336.4	62.6	0.02	0.164	0.144	0.000381054	2.97011e-05
ENSG00000103507	0	947.1	288.9	0.01	0.096	0.089	9.293e-11	1.79514e-11
ENSG00000103534	0	2062.9	769.1	0.04	0.104	0.407	4.76297e-07	5.54358e-08
ENSG00000103546	0	1458.9	425.1	0.01	0.091	0.055	0	0
ENSG00000103549	0	2226	777	0.01	0.085	0.096	0	0
ENSG00000103569	0	610.2	274.8	0.02	0.077	0.31	0.00139679	0.000100571
ENSG00000103591	0	652.2	292.8	0.01	0.092	0.085	5.64994e-09	8.53007e-10
ENSG00000103599	0	1962.9	731.1	0.02	0.054	0.45	0.000662187	4.97508e-05
ENSG00000103642	0	1205	436	0.01	0.064	0.145	3.30059e-08	4.5063e-09
ENSG00000103647	0	869.9	237.1	0	0.071	0.033	1.24245e-09	2.06062e-10
ENSG00000103653	0	1063.5	286.5	0	0.085	0.011	3.55271e-15	1.21173e-15
ENSG00000103657	0	10677.8	3866.2	0.01	0.062	0.173	0	0
ENSG00000103671	0	1219	524	0.01	0.031	0.164	9.08923e-05	7.70254e-06
ENSG00000103707	0	823.6	319.4	0.07	0.122	0.604	0.0362235	0.00219691
ENSG00000103723	0	2430.8	815.2	0.01	0.067	0.081	0	0
ENSG00000103742	0	2520.4	851.6	0.01	0.078	0.154	0	0
ENSG00000103769	0	485	163	0	0.072	0.001	4.7748e-08	6.38073e-09
ENSG00000103811	0	755.5	249.5	0.01	0.093	0.162	1.16116e-06	1.27643e-07
ENSG00000103876	0	917.5	339.5	0.02	0.1	0.192	6.88634e-08	8.9839e-09
ENSG00000103888	0	2871.8	1085.2	0.01	0.083	0.099	0	0
ENSG00000103932	0	2866.3	1312.7	0.02	0.064	0.332	3.44396e-10	6.18958e-11
ENSG00000103942	0	838.8	220.2	0	0.086	0.056	6.17328e-09	9.26467e-10
ENSG00000103966	0	1363.7	259.3	0	0.119	0.019	0	0
ENSG00000103978	0	1171.7	493.3	0.01	0.041	0.212	6.79207e-05	5.85224e-06
ENSG00000103994	0	4084.5	1564.5	0.01	0.052	0.248	5.42899e-14	1.59866e-14
ENSG00000103995	0	2942.5	1161.5	0.02	0.043	0.437	0.000136973	1.13431e-05
ENSG00000104047	0	724.9	187.1	0.01	0.011	0.717	0.701262	0.0373489
ENSG00000104059	0	873.7	341.3	0.03	0.131	0.248	5.05312e-08	6.72683e-09
ENSG00000104067	0	3954.9	1199.1	0.03	0.111	0.306	2.22045e-16	8.63792e-17
ENSG00000104112	0	1094.3	309.7	0.01	0.089	0.113	3.91633e-09	6.07983e-10
ENSG00000104129	0	678.8	233.2	0.01	0.097	0.078	1.06284e-08	1.5434e-09
ENSG00000104131	0	644.5	129.5	0	0.078	0.02	1.10525e-06	1.219e-07
ENSG00000104133	0	5400.1	1913.9	0.04	0.086	0.433	1.4628e-11	3.12115e-12
ENSG00000104140	0	562.7	145.3	0.01	0.089	0.061	6.25907e-07	7.1471e-08
ENSG00000104142	0	2190.1	728.9	0	0.092	0.015	0	0
ENSG00000104154	0	951.9	335.1	0.08	0.117	0.644	0.0672032	0.00396583
ENSG00000104164	0	383	112	0.07	0.148	0.492	0.0624173	0.00369864
ENSG00000104177	0	1329.3	470.7	0.01	0.025	0.262	0.00367267	0.000251374
ENSG00000104213	0	813.7	311.3	0.01	0.111	0.115	1.17206e-10	2.23579e-11
ENSG00000104218	0	2042.6	570.4	0.04	0.07	0.581	0.0189403	0.00118704
ENSG00000104219	0	723.8	248.2	0.01	0.026	0.363	0.090183	0.00525569
ENSG00000104221	0	880.8	376.2	0.01	0.069	0.173	1.14756e-06	1.26243e-07
ENSG00000104231	0	596.1	207.9	0.01	0.03	0.339	0.0780428	0.00457936
ENSG00000104237	0	4870.8	1579.2	0.03	0.065	0.433	1.27089e-08	1.82556e-09
ENSG00000104267	0	560.6	219.4	0.01	0.068	0.162	0.000171918	1.40554e-05
ENSG00000104290	0	1406.5	591.5	0	0.039	0.074	8.56466e-09	1.26075e-09
ENSG00000104299	0	1499.3	471.7	0.01	0.132	0.11	0	0
ENSG00000104312	0	1175.3	444.7	0.01	0.043	0.277	0.000532845	4.05707e-05
ENSG00000104313	0	1268.6	504.4	0.01	0.049	0.161	5.84536e-07	6.70508e-08
ENSG00000104321	0	2481.1	869.9	0.01	0.067	0.196	4.74021e-12	1.07449e-12
ENSG00000104324	0	1041.5	374.5	0.04	0.076	0.468	0.0089117	0.000582088
ENSG00000104325	0	742.9	262.1	0.01	0.054	0.255	0.00149287	0.000107074
ENSG00000104331	0	762	315	0.01	0.055	0.097	2.12782e-06	2.25588e-07
ENSG00000104332	0	807.7	134.3	0.01	0.207	0.024	0	0
ENSG00000104341	0	707.7	222.3	0.02	0.102	0.201	6.9324e-06	6.8321e-07
ENSG00000104356	0	2139.1	785.9	0.06	0.126	0.473	1.76285e-06	1.88758e-07
ENSG00000104361	0	703.3	265.7	0.05	0.082	0.64	0.143647	0.00819369
ENSG00000104365	0	1681.3	586.7	0	0.077	0.016	0	0
ENSG00000104369	0	1457.6	525.4	0	0.063	0.022	1.11022e-16	4.43952e-17
ENSG00000104381	0	723.6	350.4	0	0.02	0.214	0.0206451	0.00128769
ENSG00000104408	0	923.9	411.1	0	0.041	0.001	1.47035e-09	2.41882e-10
ENSG00000104412	0	693.8	197.2	0	0.055	0.026	2.02945e-06	2.15567e-07
ENSG00000104413	0	1263.2	635.8	0	0.031	0.052	4.96182e-08	6.61493e-09
ENSG00000104415	0	832.9	268.1	0.02	0.129	0.136	3.60794e-10	6.46046e-11
ENSG00000104419	0	929.7	252.3	0.01	0.14	0.039	0	0
ENSG00000104427	0	758.4	216.6	0.01	0.077	0.121	2.91435e-06	3.03557e-07
ENSG00000104442	0	608.3	237.7	0	0.05	0.001	1.26886e-07	1.59689e-08
ENSG00000104447	0	2708	1135	0.01	0.033	0.171	3.53976e-09	5.52694e-10
ENSG00000104450	0	2004.1	773.9	0.02	0.066	0.293	8.63986e-08	1.11108e-08
ENSG00000104497	0	804.5	227.5	0.02	0.079	0.205	6.27094e-05	5.43038e-06
ENSG00000104517	0	6052.9	2344.1	0	0.041	0.02	0	0
ENSG00000104522	0	765.4	197.6	0.01	0.093	0.115	2.6785e-07	3.22645e-08
ENSG00000104524	0	624.4	197.6	0.02	0.106	0.157	2.06747e-06	2.19414e-07
ENSG00000104537	0	785	286	0.02	0.102	0.168	1.73434e-07	2.14575e-08
ENSG00000104549	0	1263.8	458.2	0.05	0.103	0.491	0.00169716	0.000121072
ENSG00000104613	0	1555.6	574.4	0	0.083	0.016	0	0
ENSG00000104626	0	744.3	188.7	0.12	0.213	0.542	0.0159864	0.00101116
ENSG00000104635	0	1116.8	359.2	0.01	0.096	0.118	1.02827e-10	1.97797e-11
ENSG00000104643	0	1140.3	506.7	0	0.09	0.05	1.11022e-16	4.43952e-17
ENSG00000104671	0	401	169	0	0.056	0.001	2.8769e-06	2.99913e-07
ENSG00000104679	0	1004	370	0.02	0.077	0.268	1.44404e-05	1.36799e-06
ENSG00000104695	0	609.8	317.2	0	0.029	0.001	1.05733e-05	1.01653e-06
ENSG00000104722	0	2152.3	595.7	0.01	0.082	0.141	5.9952e-14	1.75478e-14
ENSG00000104728	0	1415.8	552.2	0.01	0.104	0.131	7.88258e-15	2.56289e-15
ENSG00000104731	0	1189.7	370.3	0.02	0.131	0.144	1.74749e-13	4.78872e-14
ENSG00000104738	0	1806.8	782.2	0.01	0.064	0.079	1.11022e-16	4.43952e-17
ENSG00000104756	0	798	369	0	0.024	0.001	7.47536e-06	7.32569e-07
ENSG00000104760	0	350.2	84.8	0.01	0.064	0.226	0.0365308	0.00221444
ENSG00000104763	0	911.4	321.6	0.03	0.075	0.457	0.0100069	0.00064927
ENSG00000104765	0	517.5	139.5	0.03	0.131	0.218	0.000344392	2.70106e-05
ENSG00000104783	0	469.6	130.4	0.01	0.1	0.09	1.07967e-05	1.0361e-06
ENSG00000104812	0	1744.9	466.1	0	0.107	0.033	0	0
ENSG00000104814	0	1087.4	355.6	0.09	0.201	0.466	3.98009e-05	3.55037e-06
ENSG00000104823	0	591	153	0.02	0.115	0.216	7.93154e-05	6.76463e-06
ENSG00000104824	0	1330.7	436.3	0	0.05	0.091	8.82247e-09	1.29505e-09
ENSG00000104852	0	956.1	354.9	0	0.072	0.001	1.44329e-15	5.17131e-16
ENSG00000104853	0	1640.4	366.6	0	0.112	0.017	0	0
ENSG00000104856	0	1246.6	322.4	0.01	0.174	0.032	0	0
ENSG00000104859	0	1563.6	458.4	0	0.102	0.019	0	0
ENSG00000104883	0	573.8	149.2	0.01	0.107	0.085	2.40473e-07	2.91736e-08
ENSG00000104884	0	1815.6	455.4	0.01	0.131	0.06	0	0
ENSG00000104885	0	3622.7	862.3	0.03	0.201	0.145	0	0
ENSG00000104889	0	665.5	231.5	0.02	0.078	0.245	0.00035146	2.75207e-05
ENSG00000104897	0	840.1	425.9	0	0.129	0.029	0	0
ENSG00000104899	0	410.4	90.6	0.01	0.212	0.047	7.0139e-10	1.20682e-10
ENSG00000104903	0	466.5	154.5	0.01	0.051	0.13	0.00127224	9.21229e-05
ENSG00000104904	0	525.3	155.7	0	0.04	0.096	0.0019141	0.000135687
ENSG00000104907	0	1448	523	0.02	0.079	0.233	1.90958e-08	2.68029e-09
ENSG00000104915	0	567	180	0	0.094	0.038	1.28316e-08	1.84138e-09
ENSG00000104946	0	1546	398	0.01	0.149	0.044	0	0
ENSG00000104951	0	1442.1	321.9	0.02	0.158	0.113	0	0
ENSG00000104967	0	437.6	102.4	0	0.094	0.001	4.53794e-08	6.08089e-09
ENSG00000104973	0	1589.2	603.8	0.02	0.151	0.133	0	0
ENSG00000104980	0	991.6	253.4	0.01	0.12	0.06	6.01741e-14	1.75917e-14
ENSG00000104983	0	1098.5	275.5	0.01	0.093	0.14	5.82026e-09	8.76728e-10
ENSG00000105011	0	478.4	121.6	0.01	0.178	0.072	2.63435e-09	4.18752e-10
ENSG00000105048	0	644	187	0.01	0.103	0.089	7.47061e-08	9.71318e-09
ENSG00000105088	0	1132.1	229.9	0	0.111	0.024	5.55111e-16	2.07019e-16
ENSG00000105135	0	1378.8	517.2	0.01	0.132	0.074	0	0
ENSG00000105143	0	490	119	0.01	0.114	0.129	2.13136e-05	1.97004e-06
ENSG00000105171	0	497	163	0.01	0.071	0.204	0.00156471	0.000112072
ENSG00000105173	0	861.9	368.1	0.01	0.034	0.251	0.00491297	0.000331973
ENSG00000105176	0	1064.3	309.7	0.02	0.082	0.197	1.59009e-06	1.71365e-07
ENSG00000105185	0	239.1	135.9	0	0.074	0.001	1.65201e-05	1.5513e-06
ENSG00000105186	0	1671	690	0.01	0.097	0.128	0	0
ENSG00000105197	0	969.2	389.8	0.02	0.097	0.212	5.0378e-08	6.70888e-09
ENSG00000105202	0	685.2	271.8	0.03	0.11	0.244	2.0543e-05	1.90411e-06
ENSG00000105204	0	1464.3	422.7	0	0.073	0.028	1.11022e-16	4.43952e-17
ENSG00000105220	0	1285.6	388.4	0	0.098	0.049	1.11022e-16	4.43952e-17
ENSG00000105221	0	1154.5	288.5	0	0.106	0.017	0	0
ENSG00000105223	0	1146.6	323.4	0.01	0.072	0.087	7.48697e-10	1.28308e-10
ENSG00000105229	0	1105.2	223.8	0	0.2	0.005	0	0
ENSG00000105245	0	1015.2	400.8	0	0.089	0.045	4.77396e-15	1.59768e-15
ENSG00000105248	0	319.8	88.2	0	0.059	0.001	8.5784e-05	7.28824e-06
ENSG00000105251	0	511.6	205.4	0	0.079	0.05	2.73625e-07	3.28789e-08
ENSG00000105255	0	825.7	215.3	0.01	0.118	0.127	1.47104e-08	2.09616e-09
ENSG00000105270	0	1217.5	423.5	0	0.068	0.012	6.66134e-16	2.46161e-16
ENSG00000105289	0	857.2	270.8	0.02	0.16	0.129	9.49019e-13	2.35186e-13
ENSG00000105290	0	1428.8	524.2	0.01	0.074	0.185	2.45491e-09	3.91593e-10
ENSG00000105321	0	1130.2	447.8	0.02	0.116	0.163	2.54108e-12	5.9712e-13
ENSG00000105323	0	1445.4	528.6	0	0.054	0.038	3.12306e-13	8.27575e-14
ENSG00000105325	0	1227.8	251.2	0	0.188	0.001	0	0
ENSG00000105339	0	2779.9	811.1	0.04	0.106	0.4	7.78838e-09	1.15205e-09
[truncated: 11,949 more rows]

## Sheet: Supplemental_Table_S5
Supplemental Table S5. Paralogous Ka/Ks test for protein-coding genes
Child Ensembl ID	Parent Ensembl ID	Child Branch	Parent Branch	N	S	Ka	Ks	Ka/Ks	P	q
ENSG00000003096	ENSG00000198642	1	0	1378.4	460.6	0.04	0.641	0.056	0	0
ENSG00000004846	ENSG00000085563	1	0	2792.1	927.9	0.34	2.697	0.126	0	0
ENSG00000005243	ENSG00000111481	4	0	391.1	127.9	0.16	3.987	0.039	0	0
ENSG00000005421	ENSG00000105854	5	0	788.5	273.5	0.21	1.44	0.147	1.94289e-14	1.59132e-14
ENSG00000006074	ENSG00000006075	5	4	207.6	59.4	0.26	0.404	0.642	0.46308	0.131059
ENSG00000006125	ENSG00000100280	1	0	2122.4	682.6	0.09	2.839	0.033	0	0
ENSG00000006534	ENSG00000132746	1	0	977.2	174.8	0.1	0.653	0.146	7.08459e-11	4.88049e-11
ENSG00000006788	ENSG00000109061	1	0	4533.9	1277.1	0.11	1.597	0.067	0	0
ENSG00000009780	ENSG00000077458	2	0	709.8	208.2	0.19	2.43	0.077	0	0
ENSG00000010438	ENSG00000204983	11	0	564.8	176.2	0.07	0.162	0.449	0.69357	0.18022
ENSG00000013441	ENSG00000113240	2	0	1098.4	335.6	0.12	2.332	0.052	0	0
ENSG00000025423	ENSG00000139547	4	0	722.6	228.4	0.24	1.417	0.17	1.45981e-09	9.46925e-10
ENSG00000026950	ENSG00000111801	8	0	1095.4	440.6	0.09	0.171	0.517	0.853579	0.209194
ENSG00000034510	ENSG00000205542	3	0	101.8	21.2	0.12	4.154	0.03	7.61961e-07	4.25868e-07
ENSG00000037042	ENSG00000131462	2	0	1112.6	240.4	0.01	0.327	0.028	0	0
ENSG00000037241	ENSG00000161970	1	0	342.2	92.8	0.01	1.599	0.006	0	0
ENSG00000040731	ENSG00000113361	1	0	1724.9	636.1	0.17	3.742	0.045	0	0
ENSG00000044090	ENSG00000112659	2	0	2340.8	758.2	0.24	1.129	0.21	0	0
ENSG00000052795	ENSG00000217128	1	0	1634.9	543.1	0.39	4.055	0.095	0	0
ENSG00000056277	ENSG00000137871	5	0	1649.5	507.5	0.19	0.388	0.489	0.851449	0.20916
ENSG00000057149	ENSG00000206073	6	4	840.7	329.3	0.05	0.061	0.766	0.157827	0.0553275
ENSG00000062038	ENSG00000039068	1	0	1845.1	611.9	0.33	4.919	0.068	0	0
ENSG00000062096	ENSG00000006756	2	0	1276.1	442.9	0.32	2.563	0.125	0	0
ENSG00000065665	ENSG00000058262	2	0	1013.7	414.3	0.04	3.262	0.012	0	0
ENSG00000066813	ENSG00000183747	12	2	1210.7	520.3	0.01	0.01	1.384	0.03565	0.0139257
ENSG00000067177	ENSG00000044446	1	0	2732.2	924.8	0.21	3.134	0.069	0	0
ENSG00000072042	ENSG00000139988	2	0	677.4	255.6	0.19	1.846	0.102	0	0
ENSG00000072210	ENSG00000108602	1	0	1002.4	314.6	0.2	4.619	0.044	0	0
ENSG00000072444	ENSG00000188611	13	0	1437.7	428.3	0	0.003	0.565	0.921577	0.221644
ENSG00000075407	ENSG00000196693	6	5	1285.9	352.1	0.32	0.907	0.357	0.0100908	0.00427019
ENSG00000075886	ENSG00000152086	12	8	1023.2	326.8	0.01	0.032	0.189	0.0583475	0.021971
ENSG00000076053	ENSG00000255663	1	0	329.8	102.2	0	0.011	0.281	0.693199	0.18022
ENSG00000078668	ENSG00000165637	1	0	664.9	184.1	0.15	3.719	0.041	0	0
ENSG00000081041	ENSG00000163739	5	3	242.2	78.8	0.05	0.144	0.337	0.389156	0.113726
ENSG00000081665	ENSG00000105750	9	8	970.4	301.6	0.16	0.272	0.594	0.354212	0.106274
ENSG00000083750	ENSG00000155876	3	0	709.7	229.3	0.01	1.45	0.006	0	0
ENSG00000083812	ENSG00000249471	5	2	1212.5	311.5	0.04	0.146	0.297	0.0194501	0.00787487
ENSG00000083814	ENSG00000197128	5	3	1011	384	0.36	0.736	0.485	0.828228	0.20445
ENSG00000085265	ENSG00000160339	5	1	717	222	0.13	0.379	0.336	0.0361145	0.0140762
ENSG00000085514	ENSG00000121716	5	3	494.2	162.8	0.09	0.117	0.766	0.177675	0.0613179
ENSG00000086205	ENSG00000077616	2	0	1670.3	510.7	0.19	1.858	0.104	0	0
ENSG00000088881	ENSG00000108001	3	0	1405.2	331.8	0.14	3.082	0.046	0	0
ENSG00000088926	ENSG00000164344	1	0	1394.6	477.4	0.3	1.593	0.189	7.77156e-16	6.83795e-16
ENSG00000089335	ENSG00000197841	8	5	1029.9	296.1	0.04	0.071	0.607	0.507399	0.140251
ENSG00000092009	ENSG00000100448	4	3	535.9	181.1	0.4	2.064	0.192	6.42643e-06	3.44034e-06
ENSG00000092607	ENSG00000112837	1	0	1245.6	446.4	0.32	4.359	0.072	0	0
ENSG00000100012	ENSG00000100003	3	0	924.5	266.5	0.14	1.86	0.075	0	0
ENSG00000100307	ENSG00000141582	1	0	207.1	44.9	0.18	2.177	0.083	1.44549e-07	8.45104e-08
ENSG00000100320	ENSG00000078328	1	0	765.5	290.5	0.19	2.024	0.094	0	0
ENSG00000100336	ENSG00000128284	5	0	679.4	277.6	0.28	0.214	1.326	2.11609e-08	1.31045e-08
ENSG00000100342	ENSG00000128335	7	4	818.2	306.8	0.26	0.201	1.274	5.96468e-08	3.58149e-08
ENSG00000100453	ENSG00000100450	4	3	556.8	178.2	0.2	0.472	0.415	0.347275	0.105149
ENSG00000100557	ENSG00000122705	1	0	275.4	96.6	0.38	0.6	0.625	0.389841	0.113726
ENSG00000101210	ENSG00000156508	1	0	1088	295	0.05	4.211	0.011	0	0
ENSG00000102010	ENSG00000010671	2	0	1458.3	428.7	0.4	2.68	0.149	0	0
ENSG00000102048	ENSG00000165192	1	0	583.6	223.4	0.37	1.904	0.195	6.56629e-07	3.68154e-07
ENSG00000102069	ENSG00000177889	9	0	341.5	114.5	0.04	0.074	0.539	0.875383	0.212253
ENSG00000102128	ENSG00000172476	8	6	652.6	178.4	0.01	0.07	0.112	0.0033685	0.00151568
ENSG00000102239	ENSG00000126010	1	0	690.2	242.8	0.28	3.365	0.084	1.77636e-15	1.53261e-15
ENSG00000102317	ENSG00000099622	5	0	337.5	118.5	0.21	2.991	0.069	1.18486e-11	8.49152e-12
ENSG00000102678	ENSG00000078579	1	0	460.5	151.5	0.17	2.604	0.067	0	0
ENSG00000104689	ENSG00000120889	3	2	851.4	321.6	0.31	0.515	0.6	0.21	0.0702901
ENSG00000104833	ENSG00000188229	1	0	1126.9	205.1	0.01	2.856	0.003	0	0
ENSG00000104938	ENSG00000090659	6	5	882.6	278.4	0.09	0.235	0.389	0.232438	0.0762213
ENSG00000105146	ENSG00000178999	5	0	678.6	221.4	0.14	1.426	0.099	0	0
ENSG00000105352	ENSG00000170956	9	3	518.8	213.2	0.25	0.307	0.828	0.00817244	0.00350004
ENSG00000105366	ENSG00000168995	5	4	1038.4	362.6	0.19	0.309	0.625	0.125129	0.0451109
ENSG00000105438	ENSG00000136240	1	0	500	136	0.1	3.359	0.029	0	0
ENSG00000105492	ENSG00000254521	5	4	996.9	317.1	0.33	0.715	0.464	0.576309	0.155431
ENSG00000105568	ENSG00000137713	1	0	1264.5	499.5	0.08	4.82	0.017	0	0
ENSG00000105708	ENSG00000242852	7	6	1448.3	384.7	0.17	0.589	0.286	2.20589e-05	1.15994e-05
ENSG00000105808	ENSG00000170667	9	2	2010.8	398.2	0	0.005	0.202	0.37329	0.11063
ENSG00000105889	ENSG00000164647	12	1	608.2	183.8	0.04	0.057	0.636	0.585291	0.156665
ENSG00000105929	ENSG00000033627	1	0	1882.8	601.2	0.28	2.905	0.095	0	0
ENSG00000106648	ENSG00000178234	4	0	970.5	337.5	0.36	1.36	0.264	1.76793e-05	9.32405e-06
ENSG00000106714	ENSG00000154529	12	9	2746.4	1117.6	0.01	0.02	0.421	0.571421	0.154582
ENSG00000106829	ENSG00000196781	1	0	1698.7	593.3	0.07	1.288	0.052	0	0
ENSG00000107018	ENSG00000107014	10	5	403.4	151.6	0.11	0.103	1.038	0.0247657	0.00986928
ENSG00000107625	ENSG00000165732	1	0	1568	490	0.29	1.714	0.171	0	0
ENSG00000107798	ENSG00000173239	2	1	841.6	268.4	0.27	2.319	0.115	1.11022e-16	9.96584e-17
ENSG00000108448	ENSG00000221926	10	0	881.6	324.4	0.01	0.018	0.575	0.794336	0.198287
ENSG00000108839	ENSG00000161905	4	0	1503	483	0.23	1.729	0.136	0	0
ENSG00000109063	ENSG00000133020	1	0	4475.9	1302.1	0.09	1.628	0.056	0	0
ENSG00000109158	ENSG00000145863	2	0	836.9	279.1	0.14	3.683	0.039	0	0
ENSG00000109181	ENSG00000156096	9	3	1157.8	423.2	0.08	0.192	0.415	0.290077	0.0912502
ENSG00000110203	ENSG00000165457	8	3	559.9	130.1	0.08	0.784	0.107	2.61185e-11	1.83484e-11
ENSG00000110330	ENSG00000023445	1	0	1378.1	418.9	0.16	0.716	0.224	1.7728e-10	1.20723e-10
ENSG00000110484	ENSG00000124939	7	3	195.8	80.2	0.35	0.495	0.702	0.343685	0.104597
ENSG00000111110	ENSG00000155367	1	0	1006.3	328.7	0.32	4.201	0.075	0	0
ENSG00000111196	ENSG00000162385	5	0	332.4	99.6	0	1.045	0.001	0	0
ENSG00000111371	ENSG00000139209	1	0	1046.8	381.2	0.37	3.356	0.11	0	0
ENSG00000111540	ENSG00000108774	1	0	476.2	150.8	0.08	2.025	0.042	0	0
ENSG00000111843	ENSG00000137210	8	2	200.5	102.5	0.1	0.04	2.353	0.00230728	0.00105964
ENSG00000112186	ENSG00000131236	1	0	1050.8	356.2	0.27	3.992	0.067	0	0
ENSG00000112242	ENSG00000007968	1	0	904.7	280.3	0.41	4.287	0.096	8.88178e-16	7.73818e-16
ENSG00000112763	ENSG00000124508	4	0	1116.6	401.4	0.08	0.147	0.529	0.764582	0.193028
ENSG00000112855	ENSG00000170445	2	0	1016.4	399.6	0.15	1.233	0.118	0	0
ENSG00000113504	ENSG00000124140	2	0	2556.4	575.6	0.15	3.304	0.045	0	0
ENSG00000114126	ENSG00000198176	1	0	914.1	300.9	0.25	3.911	0.065	0	0
ENSG00000114251	ENSG00000111186	2	0	911.5	165.5	0.1	3.346	0.03	0	0
ENSG00000114279	ENSG00000102466	1	0	566.6	156.4	0.18	1.845	0.1	1.11022e-16	9.96584e-17
ENSG00000114547	ENSG00000065371	8	4	457.1	178.9	0.02	0.047	0.484	0.947053	0.22685
ENSG00000114554	ENSG00000130827	1	0	4674.8	917.2	0.21	2.71	0.078	0	0
ENSG00000115252	ENSG00000154678	1	0	1182.5	389.5	0.2	4.141	0.048	0	0
ENSG00000116095	ENSG00000106086	1	0	472.5	136.5	0.25	2.449	0.104	1.30715e-10	8.93556e-11
ENSG00000116985	ENSG00000183682	5	0	977.1	228.9	0.01	0.07	0.104	0.000387647	0.000188246
ENSG00000117152	ENSG00000143248	1	0	420.3	113.7	0.38	2.204	0.174	1.50713e-05	7.97225e-06
ENSG00000117791	ENSG00000186205	3	1	749.1	246.9	0.22	1.172	0.19	1.25031e-09	8.13999e-10
ENSG00000120329	ENSG00000102743	6	0	646.7	256.3	0.07	0.371	0.179	9.40939e-07	5.22613e-07
ENSG00000121053	ENSG00000005381	3	0	1716.7	422.3	0.18	1.568	0.118	0	0
ENSG00000121335	ENSG00000251655	6	5	295.3	199.7	0.03	0.027	1.164	0.14575	0.0518093
ENSG00000121388	ENSG00000198752	9	0	179.3	54.7	0.15	0.485	0.306	0.294965	0.0921354
ENSG00000122718	ENSG00000186943	5	4	689.9	261.1	0.21	1.907	0.111	1.11022e-16	9.96584e-17
ENSG00000122728	ENSG00000147133	9	0	3902.4	1476.6	0.02	0.07	0.339	0.0125382	0.00521885
ENSG00000122779	ENSG00000197323	1	0	2249.2	741.8	0.37	4.935	0.076	0	0
ENSG00000123165	ENSG00000169717	5	2	850	278	0.15	1.078	0.137	0	0
ENSG00000123388	ENSG00000005073	5	0	688.6	148.4	0.31	2.551	0.122	2.93876e-13	2.27265e-13
ENSG00000123560	ENSG00000046653	1	0	534.7	179.3	0.32	2.592	0.122	1.40834e-08	8.78274e-09
ENSG00000123561	ENSG00000170054	5	1	892.7	352.3	0.42	1.006	0.414	0.185789	0.0635017
ENSG00000123562	ENSG00000185787	5	0	556.5	199.5	0.12	0.902	0.133	5.08708e-11	3.51807e-11
ENSG00000123594	ENSG00000066427	8	0	805.7	259.3	0.16	0.562	0.286	0.00153907	0.000717965
ENSG00000123685	ENSG00000156127	1	0	204.3	62.7	0.42	2.814	0.15	0.000779659	0.000373508
ENSG00000124198	ENSG00000066777	1	0	3958.8	1321.2	0.14	4.824	0.029	0	0
ENSG00000124467	ENSG00000170848	11	10	937.3	304.7	0.06	0.097	0.564	0.632726	0.167595
ENSG00000124490	ENSG00000096006	5	3	566.8	162.2	0.2	0.468	0.419	0.392037	0.114039
ENSG00000124557	ENSG00000124508	2	0	1036.2	376.8	0.43	1.879	0.227	2.08595e-07	1.21158e-07
ENSG00000125144	ENSG00000205358	9	8	154	29	0.05	0.281	0.169	0.109122	0.0399065
ENSG00000125846	ENSG00000181666	5	4	1403.3	474.7	0.3	0.844	0.358	0.00320203	0.00144443
ENSG00000125944	ENSG00000135316	1	0	1454	394	0.09	3.232	0.028	0	0
ENSG00000126351	ENSG00000151090	1	0	879.1	221.9	0.09	3.422	0.027	0	0
ENSG00000126561	ENSG00000173757	3	0	1839.8	482.2	0.03	0.66	0.042	0	0
ENSG00000126945	ENSG00000169045	4	0	977	370	0.02	0.663	0.031	0	0
ENSG00000127314	ENSG00000116473	1	0	423.8	128.2	0.04	1.363	0.027	0	0
ENSG00000127412	ENSG00000165125	1	0	1648.4	493.6	0.15	0.775	0.2	7.99361e-15	6.63893e-15
ENSG00000127955	ENSG00000065135	1	0	802.1	259.9	0.03	2.238	0.013	0	0
ENSG00000128245	ENSG00000170027	1	0	615.7	122.3	0.08	4.079	0.019	0	0
ENSG00000128250	ENSG00000128253	9	8	674	277	0.05	0.052	0.909	0.0709254	0.0264273
ENSG00000128322	ENSG00000254709	7	2	487.6	151.4	0.15	0.367	0.421	0.441314	0.125498
ENSG00000128510	ENSG00000158516	3	2	933.6	317.4	0.26	1.43	0.183	2.14695e-12	1.59659e-12
ENSG00000128739	ENSG00000125835	4	0	469.6	250.4	0.04	0.92	0.043	0	0
ENSG00000129465	ENSG00000258973	5	0	274.1	94.9	0.02	0.033	0.476	0.952972	0.227655
ENSG00000129911	ENSG00000174595	4	0	599.3	147.7	0.22	2.22	0.101	1.2903e-12	9.7587e-13
ENSG00000130202	ENSG00000073008	1	0	791.6	225.4	0.36	1.337	0.272	0.000285467	0.000139771
ENSG00000130649	ENSG00000165841	5	4	1092	360	0.3	1.922	0.157	4.44089e-16	3.92684e-16
ENSG00000130818	ENSG00000174652	7	5	1122.6	329.4	0.3	0.662	0.45	0.43832	0.125047
ENSG00000131015	ENSG00000155918	6	5	547.2	190.8	0.03	0.038	0.841	0.258935	0.0824755
ENSG00000131471	ENSG00000131480	1	0	1690.6	571.4	0.25	1.224	0.207	4.44089e-16	3.92684e-16
ENSG00000131781	ENSG00000094963	2	1	1066	329	0.3	3.018	0.099	0	0
ENSG00000132256	ENSG00000258659	6	5	1050.7	380.3	0.31	0.593	0.526	0.708542	0.182245
ENSG00000132498	ENSG00000183148	13	12	2035.3	433.7	0	0.002	0.404	0.871861	0.211982
ENSG00000132517	ENSG00000185803	8	0	905.7	423.3	0.07	0.35	0.205	2.53068e-07	1.46035e-07
ENSG00000132661	ENSG00000101888	5	0	310.9	103.1	0.15	1.369	0.107	6.89609e-09	4.37738e-09
ENSG00000132681	ENSG00000018625	4	0	2298.2	695.8	0.11	1.028	0.111	0	0
ENSG00000132824	ENSG00000111897	1	0	1007.5	345.5	0.29	3.981	0.072	0	0
ENSG00000132840	ENSG00000145692	3	0	771.6	314.4	0.15	0.701	0.21	6.00707e-08	3.59262e-08
ENSG00000133136	ENSG00000174021	9	0	135.4	68.6	0.03	0.029	1.074	0.374566	0.11077
ENSG00000133321	ENSG00000176485	5	3	359.9	123.1	0.46	1.573	0.295	0.0583087	0.021971
ENSG00000133328	ENSG00000176485	4	3	343.3	127.7	0.21	0.696	0.295	0.0270208	0.010625
ENSG00000133433	ENSG00000099984	12	5	554.3	177.7	0	0.011	0.161	0.343922	0.104597
ENSG00000133475	ENSG00000100031	12	0	1370.8	336.2	0.03	0.078	0.377	0.293035	0.0918556
ENSG00000134115	ENSG00000144619	1	0	2239.3	754.7	0.27	3.716	0.072	0	0
ENSG00000134294	ENSG00000139209	1	0	1128	390	0.3	2.6	0.117	0	0
ENSG00000134595	ENSG00000182968	1	0	839.2	168.8	0.2	2.416	0.081	0	0
ENSG00000134762	ENSG00000134755	4	0	2035.2	652.8	0.22	1.001	0.223	0	0
ENSG00000134765	ENSG00000134755	1	0	2046.4	614.6	0.36	1.881	0.194	0	0
ENSG00000135547	ENSG00000164683	1	0	643.3	238.7	0.3	2.096	0.143	5.61473e-12	4.10669e-12
ENSG00000135702	ENSG00000183196	8	3	946.2	214.8	0.08	0.489	0.165	5.0875e-09	3.25258e-09
ENSG00000136206	ENSG00000205238	12	11	738	234	0.02	0.018	0.953	0.244575	0.0790346
ENSG00000136267	ENSG00000058866	1	0	1706.5	552.5	0.25	4.651	0.053	0	0
ENSG00000136490	ENSG00000050405	1	0	258.4	59.6	0.32	4.896	0.065	2.49439e-11	1.75927e-11
ENSG00000136573	ENSG00000101336	1	0	1114.7	265.3	0.22	3.116	0.07	0	0
ENSG00000136682	ENSG00000172785	12	0	878.4	306.6	0.01	0.02	0.35	0.553763	0.150263
ENSG00000136827	ENSG00000136816	1	0	771.3	203.7	0.2	1.878	0.105	0	0
ENSG00000136834	ENSG00000239590	5	4	669.5	254.5	0.15	0.68	0.224	7.99766e-06	4.25584e-06
ENSG00000136943	ENSG00000135047	4	0	734.1	264.9	0.15	0.331	0.464	0.685647	0.179392
ENSG00000136999	ENSG00000118523	1	0	774.6	188.4	0.35	2.875	0.122	2.94098e-13	2.27265e-13
ENSG00000137040	ENSG00000065150	5	0	2433.1	863.9	0.12	0.695	0.166	0	0
ENSG00000137075	ENSG00000146083	1	0	876.1	380.9	0.24	3.802	0.062	0	0
ENSG00000137628	ENSG00000181381	1	0	3760	1277	0.22	0.51	0.43	0.0454337	0.0174032
ENSG00000138613	ENSG00000117362	3	0	517.3	220.7	0.36	3.521	0.103	1.0279e-11	7.39644e-12
ENSG00000138653	ENSG00000164100	1	0	1922.2	693.8	0.11	1.136	0.099	0	0
ENSG00000138758	ENSG00000125354	1	0	983.5	309.5	0.11	4.995	0.021	0	0
ENSG00000138767	ENSG00000113300	1	0	1242.8	407.2	0.12	2.635	0.047	0	0
ENSG00000139163	ENSG00000143845	1	0	785.7	249.3	0.29	4.901	0.059	0	0
ENSG00000139223	ENSG00000140350	10	0	282	111	0.06	0.078	0.804	0.34568	0.104845
ENSG00000139797	ENSG00000125352	8	0	729.7	209.3	0.13	0.783	0.17	1.15909e-09	7.60177e-10
ENSG00000139985	ENSG00000134007	4	1	1628.4	522.6	0.28	0.706	0.398	0.0367173	0.0142487
ENSG00000140465	ENSG00000140505	1	0	1187.8	327.2	0.17	0.625	0.278	3.04465e-05	1.58227e-05
ENSG00000140488	ENSG00000101489	2	0	1090.1	289.9	0.17	2.62	0.066	0	0
ENSG00000140678	ENSG00000156886	2	1	2671.1	766.9	0.24	0.905	0.263	3.87912e-13	2.95901e-13
ENSG00000141338	ENSG00000154258	4	2	3548	1306	0.18	0.582	0.31	1.85085e-10	1.25557e-10
ENSG00000141437	ENSG00000122696	9	0	648.2	242.8	0.02	0.032	0.662	0.559489	0.151585
ENSG00000141469	ENSG00000132874	3	0	794.4	255.6	0.22	2.814	0.078	0	0
ENSG00000141505	ENSG00000161944	4	3	681.3	149.7	0.26	1.252	0.208	8.33074e-06	4.41985e-06
ENSG00000142046	ENSG00000248098	1	0	188.5	66.5	0.12	0.124	0.966	0.153757	0.0544594
ENSG00000142748	ENSG00000160339	4	1	637.5	190.5	0.43	2.679	0.162	7.81729e-07	4.35546e-07
ENSG00000142789	ENSG00000219073	6	0	644	166	0.04	0.105	0.34	0.259786	0.0825986
ENSG00000142794	ENSG00000219481	12	10	1284.3	503.7	0.13	0.109	1.151	4.1426e-06	2.2244e-06
ENSG00000142945	ENSG00000068796	1	0	1535	469	0.32	3.923	0.082	0	0
ENSG00000143185	ENSG00000143184	9	4	244.3	97.7	0.01	0.031	0.274	0.510599	0.140917
ENSG00000143786	ENSG00000174871	1	0	368.6	108.4	0.1	3.911	0.025	0	0
ENSG00000143811	ENSG00000183010	4	0	732	222	0.08	1.16	0.066	0	0
ENSG00000143954	ENSG00000172016	5	4	387.4	137.6	0.07	0.097	0.757	0.254147	0.0816487
ENSG00000144134	ENSG00000079974	12	0	523.5	190.5	0.01	0.011	0.558	0.906654	0.218647
ENSG00000144161	ENSG00000188177	5	0	634.1	163.9	0.4	2.817	0.141	5.97434e-07	3.36025e-07
ENSG00000144199	ENSG00000115042	11	3	660.5	281.5	0.01	0.032	0.303	0.353771	0.106274
ENSG00000144233	ENSG00000101935	1	0	683.1	207.9	0.22	2.377	0.091	0	0
ENSG00000144278	ENSG00000141429	1	0	1266.3	392.7	0.08	4.325	0.019	0	0
ENSG00000144285	ENSG00000136531	1	0	4445.7	1527.3	0.07	0.795	0.085	0	0
ENSG00000144524	ENSG00000111652	1	0	600.7	185.3	0.3	3.61	0.083	6.07292e-14	4.90618e-14
ENSG00000144635	ENSG00000135720	1	0	1099.4	370.6	0.22	2.706	0.083	0	0
ENSG00000145088	ENSG00000144597	1	0	566.2	165.8	0.35	3.544	0.098	4.79677e-11	3.33026e-11
ENSG00000145428	ENSG00000137522	4	0	697.7	226.3	0.19	2.375	0.08	0	0
ENSG00000145736	ENSG00000183474	12	0	898.6	286.4	0	0.004	0.935	0.575573	0.155431
ENSG00000146477	ENSG00000112499	2	0	1168.3	421.7	0.39	2.719	0.142	0	0
ENSG00000146731	ENSG00000132141	7	4	1162.1	427.9	0.08	1.106	0.074	0	0
ENSG00000146856	ENSG00000165923	1	0	1410.8	422.2	0.31	3.055	0.102	0	0
ENSG00000147124	ENSG00000127081	6	5	1658.7	567.3	0.23	0.662	0.354	0.00260878	0.00118889
ENSG00000147416	ENSG00000116039	1	0	1088	358	0.06	3.305	0.019	0	0
ENSG00000147485	ENSG00000130508	3	0	3270.2	1052.8	0.27	4.545	0.06	0	0
ENSG00000147570	ENSG00000101152	1	0	460.6	115.4	0.19	4.667	0.041	0	0
ENSG00000147883	ENSG00000147889	3	1	299.6	87.4	0.1	0.592	0.161	0.000192576	9.53404e-05
ENSG00000147996	ENSG00000196873	12	11	809.1	375.9	0	0.003	0.509	0.989845	0.234793
ENSG00000148377	ENSG00000067064	4	0	512.4	168.6	0.23	2.065	0.111	3.10307e-13	2.37724e-13
ENSG00000149289	ENSG00000102053	1	0	1766.5	609.5	0.33	3.784	0.087	0	0
ENSG00000149403	ENSG00000105737	1	0	2277.9	491.1	0.18	3.493	0.051	0	0
ENSG00000149452	ENSG00000197901	1	0	1239.6	341.4	0.37	2.793	0.134	1.11022e-16	9.96584e-17
ENSG00000149531	ENSG00000109536	11	0	347.3	126.7	0.02	0.017	1.207	0.249895	0.0806074
ENSG00000150201	ENSG00000089356	5	3	188.9	63.1	0.33	0.983	0.331	0.186767	0.0637134
ENSG00000150244	ENSG00000168930	12	9	454.4	169.6	0.08	0.065	1.164	0.0248686	0.00988808
ENSG00000150526	ENSG00000258941	1	0	1324.1	265.9	0.01	0.011	0.72	0.658504	0.173343
ENSG00000151005	ENSG00000007350	5	1	1231.4	517.6	0.16	0.586	0.275	1.56097e-06	8.58938e-07
ENSG00000151033	ENSG00000120563	8	3	443.9	138.1	0.01	0.045	0.26	0.295485	0.0921361
ENSG00000151079	ENSG00000130037	1	0	1084.2	220.8	0.16	1.165	0.135	2.55351e-15	2.16116e-15
ENSG00000151834	ENSG00000022355	1	0	939.2	308.8	0.12	4.446	0.026	0	0
ENSG00000151846	ENSG00000070756	8	0	1371.2	518.8	0.04	0.083	0.424	0.469056	0.132539
ENSG00000152726	ENSG00000172661	12	0	2620.4	1048.6	0.01	0.007	1.006	0.117289	0.0424564
ENSG00000153253	ENSG00000136531	1	0	4405.2	1579.8	0.07	0.702	0.105	0	0
ENSG00000153294	ENSG00000164393	1	0	1388.3	504.7	0.42	2.317	0.181	2.2955e-12	1.69994e-12
ENSG00000153896	ENSG00000204524	5	4	1289.3	420.7	0.29	1.125	0.259	3.2598e-08	1.99785e-08
ENSG00000153976	ENSG00000125430	1	0	937	137	0.12	0.752	0.165	6.02364e-08	3.59262e-08
ENSG00000154262	ENSG00000154263	3	1	3395.6	1179.4	0.26	0.807	0.325	1.06131e-08	6.68902e-09
ENSG00000154269	ENSG00000197594	1	0	1967.9	558.1	0.37	4.051	0.092	0	0
ENSG00000154310	ENSG00000071054	1	0	2915.8	924.2	0.21	4.683	0.045	0	0
ENSG00000154537	ENSG00000182368	13	12	150.9	50.1	0	0.021	0.001	0.170098	0.0589547
ENSG00000154928	ENSG00000133216	1	0	2350.5	559.5	0.15	3.551	0.041	0	0
ENSG00000154997	ENSG00000186522	5	0	960.7	332.3	0.18	0.653	0.272	9.21486e-05	4.65281e-05
ENSG00000155368	ENSG00000176244	4	0	201.6	53.4	0.26	3.919	0.068	5.95884e-07	3.36025e-07
ENSG00000155428	ENSG00000178809	13	9	629	121	0	0.026	0.062	0.0487025	0.0185752
ENSG00000156006	ENSG00000171428	2	0	640.9	229.1	0.11	0.262	0.415	0.389099	0.113726
ENSG00000156222	ENSG00000137860	4	0	1405.5	505.5	0.24	1.411	0.172	0	0
ENSG00000156269	ENSG00000102030	5	0	528.6	158.4	0.09	0.943	0.098	7.88258e-14	6.33936e-14
ENSG00000157110	ENSG00000166831	1	0	423.6	158.4	0.2	1.993	0.1	2.65676e-13	2.07103e-13
ENSG00000157322	ENSG00000140839	13	12	1066.4	298.6	0.01	0.014	0.432	0.821874	0.203163
ENSG00000157358	ENSG00000204513	13	7	942.5	365.5	0.02	0.028	0.588	0.699447	0.180953
ENSG00000157399	ENSG00000006756	2	0	1276	452	0.28	1.874	0.148	0	0
ENSG00000158470	ENSG00000118276	1	0	865	281	0.18	2.793	0.066	0	0
ENSG00000158477	ENSG00000158473	4	3	711.7	254.3	0.39	0.803	0.489	0.896621	0.216816
ENSG00000158485	ENSG00000158473	5	3	721.4	265.6	0.38	0.866	0.435	0.398265	0.115473
ENSG00000158488	ENSG00000158473	4	3	714.7	266.3	0.34	0.746	0.457	0.577939	0.155635
ENSG00000158691	ENSG00000235109	5	4	855.6	320.4	0.35	1.659	0.21	3.02826e-07	1.74182e-07
ENSG00000159216	ENSG00000124813	1	0	993.2	326.8	0.18	4.542	0.04	0	0
ENSG00000159289	ENSG00000215186	12	8	1619.7	459.3	0	0.004	1.023	0.379745	0.111744
ENSG00000159399	ENSG00000156515	1	0	2159.4	576.6	0.16	4.351	0.036	0	0
ENSG00000159455	ENSG00000187180	8	4	232.1	97.9	0.03	0.032	0.812	0.501421	0.139032
ENSG00000159516	ENSG00000203785	4	3	135.2	80.8	0.14	0.192	0.722	0.3815	0.112075
ENSG00000160014	ENSG00000198668	4	0	333.3	113.7	0	3.587	0.001	0	0
ENSG00000160633	ENSG00000130254	2	0	2055.5	677.5	0.17	1.031	0.161	0	0
ENSG00000160882	ENSG00000179142	1	0	1166.1	342.9	0.03	0.114	0.287	0.0254036	0.0100558
ENSG00000161133	ENSG00000184979	9	3	663.3	251.7	0.01	0.012	1.214	0.167334	0.0583153
ENSG00000161243	ENSG00000269190	4	2	642.8	182.2	0.29	1.925	0.153	8.22438e-09	5.20194e-09
ENSG00000161640	ENSG00000142512	4	3	1519.9	457.1	0.18	0.331	0.558	0.38724	0.113573
ENSG00000161807	ENSG00000170923	11	5	663	261	0.16	0.408	0.387	0.170164	0.0589547
ENSG00000162076	ENSG00000059122	6	3	261.2	68.8	0.24	0.657	0.361	0.287436	0.0907407
ENSG00000162670	ENSG00000198797	1	0	1705.7	532.3	0.17	3.383	0.05	0	0
ENSG00000162727	ENSG00000177186	11	4	680.9	255.1	0.04	0.099	0.371	0.369073	0.109877
ENSG00000162747	ENSG00000203747	12	5	555.6	251.4	0.02	0.012	1.415	0.0999919	0.0367188
ENSG00000163017	ENSG00000107796	2	0	919.8	208.2	0	3.944	0.001	0	0
ENSG00000163040	ENSG00000152076	12	5	841.4	292.6	0.01	0.018	0.484	0.957142	0.228344
ENSG00000163114	ENSG00000131828	5	0	848.8	312.2	0.08	0.575	0.137	1.12133e-14	9.22671e-15
ENSG00000163216	ENSG00000241794	5	4	120.7	95.3	0.03	0.009	3.142	0.0886967	0.0327741
ENSG00000163218	ENSG00000159527	5	3	761	253	0.22	0.694	0.311	0.00281534	0.00127974
ENSG00000163374	ENSG00000116580	8	0	1556.8	708.2	0.04	0.039	0.948	0.00778524	0.00334226
ENSG00000163464	ENSG00000180871	4	0	763.6	238.4	0.14	0.334	0.416	0.326624	0.10061
ENSG00000163530	ENSG00000121570	5	4	452.5	168.5	0.35	1.202	0.295	0.0102467	0.00432586
ENSG00000163554	ENSG00000197694	4	0	5323.3	1891.7	0.33	4.087	0.08	0	0
ENSG00000163563	ENSG00000163564	5	4	878.3	306.7	0.34	0.653	0.516	0.841266	0.207093
ENSG00000163734	ENSG00000081041	6	5	251.7	69.3	0.06	0.061	0.952	0.239001	0.0779421
ENSG00000163735	ENSG00000124875	8	4	243.1	98.9	0.13	0.185	0.68	0.373272	0.11063
ENSG00000163737	ENSG00000109272	8	5	217.7	61.3	0.05	0.112	0.454	0.857083	0.209535
ENSG00000163823	ENSG00000183625	3	2	788.8	261.2	0.26	1.648	0.159	6.12908e-10	4.09527e-10
ENSG00000163888	ENSG00000162545	1	0	196.1	31.9	0.2	1.955	0.105	6.64154e-05	3.36303e-05
ENSG00000163923	ENSG00000198918	5	0	116	37	0.04	0.112	0.346	0.668592	0.175267
ENSG00000164037	ENSG00000164038	4	0	1013.6	390.4	0.34	1.192	0.281	2.30363e-05	1.20776e-05
ENSG00000164048	ENSG00000088876	5	4	765.6	284.4	0.37	0.652	0.572	0.377487	0.111309
ENSG00000164508	ENSG00000137259	5	0	283.2	106.8	0.03	1.802	0.019	0	0
ENSG00000164556	ENSG00000186973	8	3	278.2	123.8	0.08	0.223	0.38	0.425064	0.121852
ENSG00000164879	ENSG00000104267	1	0	601	179	0.32	1.93	0.164	4.87761e-09	3.12965e-09
ENSG00000165028	ENSG00000136783	1	0	553.5	187.5	0.07	0.193	0.354	0.200701	0.0674316
ENSG00000165055	ENSG00000087995	10	0	786	348	0.01	0.023	0.405	0.701334	0.181177
ENSG00000165059	ENSG00000072062	8	0	862.3	190.7	0.09	0.752	0.121	3.27516e-14	2.67021e-14
ENSG00000165169	ENSG00000146425	3	0	256.8	82.2	0.31	1.294	0.237	0.00947576	0.00401947
ENSG00000165390	ENSG00000150165	13	3	805.7	175.3	0	0.006	0.203	0.543312	0.148333
ENSG00000165496	ENSG00000147403	5	0	471	171	0.02	0.536	0.04	0	0
ENSG00000165502	ENSG00000241343	5	0	239.2	78.8	0	0.679	0.006	3.9635e-14	3.21665e-14
ENSG00000165568	ENSG00000085662	4	0	698.6	195.4	0.31	2.562	0.12	3.62621e-12	2.66322e-12
ENSG00000165572	ENSG00000120696	5	0	1471.9	550.1	0.05	0.196	0.276	0.00042769	0.000207125
ENSG00000165584	ENSG00000157950	11	9	411.4	152.6	0.05	0.049	0.976	0.141435	0.0504773
ENSG00000165948	ENSG00000119632	6	5	167.6	114.4	0.28	0.422	0.654	0.39032	0.113726
ENSG00000166105	ENSG00000149328	3	0	1390.2	400.8	0.32	1.177	0.273	1.78735e-06	9.8047e-07
ENSG00000166128	ENSG00000167461	1	0	474.5	146.5	0.11	2.578	0.043	0	0
ENSG00000166157	ENSG00000132958	13	9	1181.3	381.7	0.06	0.041	1.544	5.88745e-05	2.9897e-05
ENSG00000166167	ENSG00000072803	1	0	1208.2	375.8	0.08	2.6	0.032	0	0
ENSG00000166278	ENSG00000244255	1	0	1070.5	276.5	0.01	0.028	0.385	0.642521	0.169684
ENSG00000166401	ENSG00000124570	4	0	830.8	285.2	0.21	1.526	0.141	1.11022e-14	9.17785e-15
ENSG00000166526	ENSG00000125945	4	3	897.9	299.1	0.34	1.516	0.224	3.75575e-07	2.13949e-07
ENSG00000166603	ENSG00000176136	1	0	661.2	208.8	0.24	3.217	0.074	0	0
ENSG00000166664	ENSG00000175344	13	0	908.4	246.6	0	0.013	0.001	0.0122258	0.00510078
ENSG00000166793	ENSG00000175155	2	1	278.7	60.3	0.07	1.958	0.038	2.22045e-16	1.98315e-16
ENSG00000166796	ENSG00000166800	4	3	747	243	0.24	1.219	0.194	4.91494e-08	2.97126e-08
ENSG00000166926	ENSG00000110077	9	4	306.2	128.8	0.11	0.082	1.376	0.00456577	0.00202367
ENSG00000167236	ENSG00000161574	6	5	238	89	0.16	0.109	1.464	0.0055879	0.00244019
ENSG00000167261	ENSG00000141096	5	3	1060.3	376.7	0.19	0.59	0.33	0.00242809	0.00110939
ENSG00000167363	ENSG00000141560	1	0	738.2	188.8	0.23	2.016	0.115	0	0
ENSG00000167748	ENSG00000167751	5	4	588.6	191.4	0.25	0.534	0.476	0.787968	0.197251
ENSG00000168065	ENSG00000197891	4	3	1243.8	343.2	0.35	3.019	0.117	0	0
ENSG00000168148	ENSG00000183598	5	4	349.9	58.1	0.01	2.483	0.006	0	0
ENSG00000168309	ENSG00000065809	1	0	287.8	93.2	0.36	3.023	0.12	3.13446e-06	1.69847e-06
ENSG00000168594	ENSG00000134007	5	1	1644.8	476.2	0.36	0.809	0.45	0.344274	0.104597
ENSG00000168661	ENSG00000197050	6	5	1434.8	386.2	0.31	1.474	0.212	9.54925e-12	6.92743e-12
ENSG00000168671	ENSG00000145626	6	1	1134.3	431.7	0.12	0.285	0.422	0.27232	0.0861654
ENSG00000169067	ENSG00000075624	4	0	889.7	232.3	0.04	2.713	0.015	0	0
ENSG00000169239	ENSG00000174990	3	0	638.1	198.9	0.25	1.871	0.134	1.18905e-13	9.39261e-14
ENSG00000169397	ENSG00000169385	7	5	353.9	126.1	0.18	0.133	1.37	0.00101143	0.0004781
ENSG00000169432	ENSG00000153253	2	1	4366.2	1537.8	0.14	0.898	0.16	0	0
ENSG00000169474	ENSG00000169469	4	3	161.8	105.2	0.03	0.055	0.595	0.807152	0.200265
ENSG00000169548	ENSG00000198477	6	5	1153.6	391.4	0.22	0.388	0.562	0.408851	0.118157
ENSG00000169551	ENSG00000073146	5	0	532.2	196.8	0.35	1.328	0.263	0.00118309	0.000554813
ENSG00000169564	ENSG00000197111	5	0	774.1	290.9	0.08	0.724	0.104	0	0
ENSG00000169618	ENSG00000101292	5	1	931.6	214.4	0.07	1.373	0.05	0	0
ENSG00000169715	ENSG00000205362	8	6	145.3	37.7	0.03	0.184	0.18	0.153818	0.0544594
ENSG00000169813	ENSG00000169045	5	0	909.9	332.1	0.13	1.148	0.115	0	0
ENSG00000170298	ENSG00000171916	13	12	847.5	220.5	0	0.005	0.961	0.540018	0.147888
ENSG00000170323	ENSG00000147588	2	1	291.9	101.1	0.23	1.44	0.159	4.16286e-05	2.13838e-05
ENSG00000170423	ENSG00000170477	5	2	1155.5	278.5	0.33	2.29	0.146	3.21965e-15	2.71203e-15
ENSG00000170426	ENSG00000139547	1	0	734.6	204.4	0.39	1.64	0.237	0.000104169	5.18609e-05
ENSG00000170439	ENSG00000185432	4	0	572.7	159.3	0.31	1.701	0.181	4.11814e-07	2.33099e-07
ENSG00000170454	ENSG00000186081	2	1	1309.9	334.1	0.13	1.206	0.104	0	0
ENSG00000170484	ENSG00000139648	2	1	1260.5	293.5	0.15	1.128	0.132	0	0
ENSG00000170486	ENSG00000139648	5	1	1258.9	259.1	0.15	1.315	0.112	0	0
ENSG00000170516	ENSG00000131174	5	3	173.5	66.5	0.18	0.579	0.319	0.180509	0.0621754
ENSG00000170777	ENSG00000101150	5	0	288.3	104.7	0.25	0.978	0.257	0.00551726	0.00241528
ENSG00000170820	ENSG00000138039	1	0	1352.7	468.3	0.34	2.357	0.143	0	0
ENSG00000170848	ENSG00000243130	10	4	706.4	259.6	0.08	0.115	0.659	0.272458	0.0861654
ENSG00000170920	ENSG00000174667	5	4	685.7	244.3	0.26	0.931	0.276	0.000936742	0.000445161
ENSG00000170935	ENSG00000114503	5	0	336.5	107.5	0.2	1.547	0.132	1.03375e-07	6.08384e-08
ENSG00000170950	ENSG00000102144	5	0	911.5	339.5	0.06	0.582	0.109	0	0
ENSG00000170967	ENSG00000197312	5	0	826.8	322.2	0.16	1.502	0.107	0	0
ENSG00000171201	ENSG00000109208	7	5	149.8	87.2	0.09	0.109	0.786	0.340828	0.104083
ENSG00000171291	ENSG00000198429	11	9	1109.8	309.2	0.09	0.134	0.656	0.21268	0.0707872
ENSG00000171360	ENSG00000108417	5	3	1089	255	0.04	0.276	0.156	5.458e-08	3.28837e-08
ENSG00000171469	ENSG00000171466	7	4	955.4	295.6	0.07	0.088	0.765	0.0965233	0.0355921
ENSG00000171471	ENSG00000140941	12	1	285.8	89.2	0	0.012	0.291	0.715889	0.183869
ENSG00000171928	ENSG00000175106	10	0	438.5	176.5	0.01	0.023	0.405	0.772933	0.194583
ENSG00000171942	ENSG00000172519	4	3	759.8	173.2	0.06	0.243	0.226	0.00171227	0.000796668
ENSG00000171970	ENSG00000186300	6	5	1228.5	412.5	0.28	0.716	0.394	0.0580499	0.0219519
ENSG00000171989	ENSG00000166800	8	3	721.7	274.3	0.1	0.318	0.309	0.0143405	0.00591366
ENSG00000172156	ENSG00000108691	5	4	219.2	68.8	0.16	0.63	0.248	0.0221976	0.00892593
ENSG00000172208	ENSG00000174982	3	1	666.9	242.1	0.31	4.03	0.076	1.03806e-13	8.27344e-14
ENSG00000172354	ENSG00000078369	4	0	827.8	192.2	0.06	3.942	0.015	0	0
ENSG00000172404	ENSG00000105993	5	0	693.7	230.3	0.3	0.954	0.31	0.00658198	0.00284734
ENSG00000172716	ENSG00000154760	7	5	1937.8	729.2	0.14	0.183	0.787	0.00034444	0.000167722
ENSG00000172752	ENSG00000206384	1	0	4817.6	1692.4	0.36	1.512	0.24	0	0
ENSG00000172955	ENSG00000196616	1	0	814.4	301.6	0.28	1.465	0.188	7.31324e-10	4.86819e-10
ENSG00000172995	ENSG00000048991	1	0	1591.5	559.5	0.29	3.383	0.085	0	0
ENSG00000173213	ENSG00000173876	13	10	1028.9	303.1	0.02	0.054	0.312	0.198344	0.0667659
ENSG00000173262	ENSG00000059804	8	1	1060.2	418.8	0.02	0.052	0.469	0.834514	0.205716
ENSG00000173272	ENSG00000152082	12	0	395.2	78.8	0.02	0.052	0.298	0.440362	0.125428
ENSG00000173431	ENSG00000165799	5	4	355.6	106.4	0.13	0.297	0.43	0.59968	0.160035
ENSG00000173432	ENSG00000134339	5	2	259.1	106.9	0.04	0.017	2.188	0.051863	0.0196541
ENSG00000173457	ENSG00000182541	5	0	283.7	67.3	0.04	0.086	0.497	0.991708	0.234793
ENSG00000174123	ENSG00000174125	1	0	1717.7	592.3	0.44	1.621	0.269	2.33267e-07	1.35047e-07
ENSG00000174130	ENSG00000174125	1	0	1736.9	588.1	0.22	0.568	0.389	0.0258663	0.0102162
ENSG00000174156	ENSG00000243955	5	2	469.5	196.5	0.06	0.136	0.444	0.702351	0.181177
ENSG00000174339	ENSG00000188558	5	4	654.8	245.2	0.3	2.589	0.118	6.6136e-13	5.02332e-13
ENSG00000174353	ENSG00000066923	13	1	362.4	165.6	0.04	0.059	0.711	0.422897	0.121623
ENSG00000174428	ENSG00000196275	9	5	1932	915	0	0.001	3.427	0.0279317	0.0109348
ENSG00000174599	ENSG00000067167	5	0	801.5	305.5	0.17	0.446	0.39	0.130804	0.0469663
ENSG00000174740	ENSG00000090621	5	0	816	276	0.21	0.977	0.214	2.73142e-08	1.67981e-08
ENSG00000175155	ENSG00000100027	1	0	287	70	0.02	2.889	0.006	0	0
ENSG00000175322	ENSG00000105750	10	8	1253.6	315.4	0.34	0.629	0.54	0.603179	0.160727
ENSG00000175548	ENSG00000139133	2	0	988.9	430.1	0.02	0.03	0.741	0.291143	0.0914238
ENSG00000175619	ENSG00000174982	3	1	676.6	229.4	0.27	4.662	0.059	0	0
ENSG00000175787	ENSG00000181666	6	4	1319.5	453.5	0.34	0.963	0.351	0.00239237	0.00109589
ENSG00000175809	ENSG00000105879	5	0	936.4	332.6	0.34	0.351	0.957	2.39794e-05	1.25351e-05
ENSG00000175879	ENSG00000037965	1	0	567.8	140.2	0.23	3.082	0.075	0	0
ENSG00000176134	ENSG00000120254	12	1	193.3	79.7	0.02	0.082	0.259	0.318287	0.0985544
ENSG00000176401	ENSG00000176396	7	6	317.8	135.2	0.41	1.091	0.38	0.240893	0.0782718
ENSG00000176555	ENSG00000174982	3	1	642.7	245.3	0.3	4.254	0.072	2.10942e-15	1.80248e-15
ENSG00000176567	ENSG00000172208	4	3	647.9	228.1	0.27	1.303	0.21	2.70423e-06	1.46982e-06
ENSG00000177182	ENSG00000146352	1	0	718.7	262.3	0.13	3.713	0.034	0	0
ENSG00000177257	ENSG00000171711	12	5	122.9	69.1	0	0.016	0.001	0.236313	0.0772733
ENSG00000177613	ENSG00000101811	5	0	1179.9	503.1	0.14	0.729	0.189	2.33147e-15	1.98268e-15
ENSG00000177675	ENSG00000177575	4	2	2339	916	0.36	1.028	0.348	9.58237e-05	4.81104e-05
ENSG00000177752	ENSG00000145817	1	0	565.6	196.4	0.27	3.345	0.08	0	0
ENSG00000178021	ENSG00000189241	6	5	844.5	301.5	0.19	0.517	0.371	0.0503488	0.019162
ENSG00000178700	ENSG00000228716	7	1	377.5	171.5	0.04	0.076	0.475	0.90231	0.217895
ENSG00000178913	ENSG00000102387	5	0	754.2	289.8	0.3	1.459	0.203	2.19486e-06	1.19662e-06
ENSG00000178928	ENSG00000259009	5	3	451.5	202.5	0.16	0.17	0.939	0.00761406	0.00328464
ENSG00000178934	ENSG00000205076	6	3	339.9	68.1	0	0.015	0.001	0.109955	0.0401288
ENSG00000178935	ENSG00000269343	9	4	920.7	276.3	0.17	0.31	0.547	0.636146	0.168251
ENSG00000179083	ENSG00000234545	5	0	583.9	139.1	0.11	0.959	0.112	1.47175e-09	9.51197e-10
ENSG00000179331	ENSG00000155961	2	0	478.1	160.9	0.12	2.266	0.054	0	0
ENSG00000179455	ENSG00000133606	3	0	1028	367	0.36	1.081	0.337	0.0035535	0.00159087
ENSG00000179636	ENSG00000159713	2	0	396.7	98.3	0.28	2.561	0.107	3.67058e-07	2.0977e-07
ENSG00000179817	ENSG00000170255	9	1	700.7	259.3	0.14	0.119	1.185	0.00013621	6.76232e-05
ENSG00000179909	ENSG00000152454	5	4	973.3	331.7	0.23	0.574	0.409	0.156592	0.055112
ENSG00000180138	ENSG00000113712	8	0	726.4	278.6	0.05	0.228	0.201	0.000202485	9.99677e-05
ENSG00000180219	ENSG00000162771	5	3	516.4	179.6	0.28	0.924	0.301	0.00658042	0.00284734
ENSG00000180251	ENSG00000115616	1	0	1441.5	484.5	0.26	2.074	0.123	0	0
ENSG00000180340	ENSG00000155760	1	0	1434.4	236.6	0.12	2.275	0.051	0	0
ENSG00000180389	ENSG00000124172	10	1	105.4	47.6	0.04	0.042	0.993	0.42983	0.122822
ENSG00000180574	ENSG00000130741	10	0	1024.8	391.2	0.01	0.048	0.15	0.00511192	0.00225449
ENSG00000180638	ENSG00000142494	1	0	1141.3	436.7	0.42	1.982	0.212	7.83148e-08	4.65523e-08
ENSG00000180658	ENSG00000243896	13	5	682.3	247.7	0	0.004	1.091	0.482645	0.135398
ENSG00000181001	ENSG00000180988	4	0	692	250	0.15	1.508	0.099	0	0
ENSG00000181009	ENSG00000180988	4	0	667.2	250.8	0.17	1.734	0.097	0	0
ENSG00000181218	ENSG00000203812	5	4	329.2	60.8	0.01	2.118	0.004	0	0
ENSG00000181240	ENSG00000125648	4	0	725.6	177.4	0.22	2.879	0.077	0	0
ENSG00000181450	ENSG00000105750	9	8	1259.7	327.3	0.2	0.465	0.432	0.336482	0.102933
ENSG00000181616	ENSG00000255307	3	2	660.5	242.5	0.26	3.066	0.086	0	0
ENSG00000181626	ENSG00000107890	8	4	1455.9	464.1	0.34	0.417	0.82	0.00100596	0.000476781
ENSG00000181804	ENSG00000198689	1	0	1355.8	495.2	0.26	3.499	0.073	0	0
ENSG00000181867	ENSG00000167996	5	0	425.1	114.9	0.12	1.755	0.068	3.33067e-15	2.79232e-15
ENSG00000181896	ENSG00000198551	8	3	959.9	282.1	0.31	0.845	0.37	0.0431469	0.0166348
ENSG00000182053	ENSG00000168930	12	9	1002.4	353.6	0.02	0.014	1.726	0.0138062	0.00571986
ENSG00000182315	ENSG00000205718	12	11	447.9	176.1	0	0.006	0.383	0.852015	0.20916
ENSG00000182330	ENSG00000204510	10	7	1056	366	0	0.003	0.704	0.779431	0.195942
ENSG00000182518	ENSG00000133193	5	0	234.2	92.8	0.29	0.894	0.322	0.183035	0.0628019
ENSG00000182611	ENSG00000196747	2	1	299.7	84.3	0	0.079	0.043	0.00482736	0.00213429
ENSG00000182634	ENSG00000234560	5	4	696.4	236.6	0.07	0.113	0.605	0.471293	0.13296
ENSG00000182798	ENSG00000120289	6	5	743.7	261.3	0.32	0.654	0.495	0.948586	0.226912
ENSG00000182816	ENSG00000198390	5	3	395.5	114.5	0.04	0.119	0.36	0.414441	0.119578
ENSG00000182824	ENSG00000188280	13	12	239.2	120.8	0.01	0.017	0.505	0.992347	0.234793
ENSG00000182890	ENSG00000148672	10	0	1216.8	457.2	0.02	0.032	0.692	0.334753	0.102581
ENSG00000182952	ENSG00000198830	5	1	201.4	68.6	0.08	0.459	0.165	0.00293204	0.00132939
ENSG00000183049	ENSG00000134072	2	0	760	209	0.12	4.341	0.027	0	0
ENSG00000183086	ENSG00000198750	7	4	808.7	178.3	0	0.006	0.208	0.541876	0.148168
ENSG00000183434	ENSG00000198176	8	0	926	286	0.14	0.224	0.623	0.236515	0.0772733
ENSG00000183560	ENSG00000110195	4	3	565.7	142.3	0.31	2.073	0.15	1.38301e-08	8.6552e-09
ENSG00000183598	ENSG00000203852	4	3	366	42	0	0.418	0.001	4.45909e-11	3.10796e-11
ENSG00000183695	ENSG00000170255	5	1	712.7	247.3	0.25	0.326	0.759	0.0225077	0.00903019
ENSG00000183709	ENSG00000197110	5	3	444.4	143.6	0.02	0.021	0.922	0.353114	0.106274
ENSG00000183718	ENSG00000146063	5	0	603.4	191.6	0.23	1.839	0.126	9.2299e-10	6.07578e-10
ENSG00000183785	ENSG00000127824	2	0	1073.5	270.5	0.06	1.816	0.032	0	0
ENSG00000184009	ENSG00000075624	1	0	954.2	170.8	0.01	1.122	0.006	0	0
ENSG00000184022	ENSG00000196944	8	4	690.2	227.8	0.18	0.875	0.205	3.78995e-07	2.15208e-07
ENSG00000184032	ENSG00000186977	4	3	134.1	54.9	0.21	0.62	0.345	0.377639	0.111309
ENSG00000184140	ENSG00000182854	6	5	658.7	274.3	0.2	0.876	0.225	3.15323e-06	1.70345e-06
ENSG00000184155	ENSG00000196184	5	4	671.3	255.7	0.18	1.169	0.157	1.3289e-11	9.44762e-12
ENSG00000184227	ENSG00000119673	1	0	905.9	357.1	0.01	0.02	0.34	0.491412	0.136897
ENSG00000184313	ENSG00000271723	3	0	3013.5	718.5	0	0.001	0.001	0.126736	0.0455976
ENSG00000184348	ENSG00000196747	2	1	309.6	80.4	0	0.769	0.001	0	0
ENSG00000184571	ENSG00000125207	5	0	1907.3	654.7	0.39	1.24	0.312	1.98566e-06	1.0859e-06
ENSG00000184735	ENSG00000080007	4	0	1416.1	446.9	0.25	1.134	0.224	3.00384e-11	2.1019e-11
ENSG00000184785	ENSG00000178397	5	0	153.2	38.8	0.15	1.301	0.112	0.00113484	0.000533594
ENSG00000184908	ENSG00000186510	1	0	1600.5	460.5	0.04	0.143	0.296	0.00530451	0.00232787
ENSG00000185015	ENSG00000133742	1	0	586.9	196.1	0.29	1.853	0.155	7.62428e-10	5.0563e-10
ENSG00000185069	ENSG00000186442	2	1	1375.2	451.8	0.14	0.529	0.265	1.05417e-06	5.81868e-07
ENSG00000185164	ENSG00000103226	12	1	2846.8	954.2	0	0.006	0.167	0.11685	0.042384
ENSG00000185176	ENSG00000184945	13	7	728.9	192.1	0.01	0.021	0.345	0.584702	0.156665
ENSG00000185303	ENSG00000122852	8	2	505.3	238.7	0.02	0.029	0.568	0.812675	0.201169
ENSG00000185313	ENSG00000183873	2	0	4497.4	1229.6	0.24	2.596	0.093	0	0
ENSG00000185418	ENSG00000113407	1	0	1657.3	487.7	0.18	4.617	0.039	0	0
ENSG00000185684	ENSG00000183495	8	0	1075.1	385.9	0.09	0.184	0.486	0.874347	0.212253
ENSG00000185686	ENSG00000116726	6	5	1030.7	373.3	0.38	0.698	0.54	0.582162	0.156417
ENSG00000185758	ENSG00000177300	1	0	434.3	201.7	0.07	0.087	0.795	0.189517	0.0645276
ENSG00000185947	ENSG00000197302	8	5	997.1	238.9	0.24	0.849	0.281	0.000782268	0.00037375
ENSG00000185962	ENSG00000244057	5	4	193.4	73.6	0.11	0.567	0.194	0.0088988	0.00380195
ENSG00000186010	ENSG00000258674	3	0	268.3	55.7	0.01	0.04	0.283	0.548383	0.149406
ENSG00000186020	ENSG00000167637	5	4	1288.5	301.5	0.33	0.907	0.363	0.0219872	0.00886137
ENSG00000186049	ENSG00000139648	2	1	1275.6	290.4	0.09	0.78	0.116	0	0
ENSG00000186092	ENSG00000176695	13	12	615.4	299.6	0	0.007	0.705	0.70818	0.182245
ENSG00000186160	ENSG00000186377	8	1	1128.6	383.4	0.37	0.993	0.369	0.021953	0.00886137
ENSG00000186334	ENSG00000123643	4	0	1056.5	305.5	0.26	1.482	0.174	9.93139e-12	7.17536e-12
ENSG00000186469	ENSG00000168243	1	0	158.7	54.3	0.12	2.693	0.046	3.69543e-08	2.25705e-08
ENSG00000186470	ENSG00000026950	9	8	701.5	282.5	0.11	0.115	0.926	0.00906248	0.00385336
ENSG00000186766	ENSG00000168269	4	0	718.6	151.4	0.4	2.732	0.145	1.87065e-07	1.09009e-07
ENSG00000186818	ENSG00000104972	6	5	927.4	347.6	0.29	0.418	0.704	0.0178286	0.00728444
ENSG00000186844	ENSG00000196734	4	3	250.9	79.1	0.04	0.188	0.204	0.0593463	0.0222998
ENSG00000186924	ENSG00000244624	5	3	110.7	27.3	0.29	0.967	0.302	0.324252	0.100227
ENSG00000186960	ENSG00000107672	1	0	116.5	45.5	0.37	1.166	0.321	0.242592	0.0785368
ENSG00000186965	ENSG00000244025	4	3	92	58	0.27	0.27	0.995	0.170028	0.0589547
ENSG00000186967	ENSG00000244025	4	3	113.5	66.5	0.06	0.102	0.56	0.854509	0.209194
ENSG00000187010	ENSG00000188672	12	1	920.4	330.6	0.04	0.019	2.313	5.64239e-05	2.88173e-05
ENSG00000187175	ENSG00000205439	5	4	243.1	44.9	0.15	0.814	0.182	0.0173492	0.0071049
ENSG00000187372	ENSG00000113212	8	0	1767.8	608.2	0.18	0.737	0.238	2.83729e-12	2.09245e-12
ENSG00000187416	ENSG00000156959	1	0	540.9	101.1	0.13	2.534	0.05	0	0
ENSG00000187474	ENSG00000171051	7	5	760.9	286.1	0.34	0.768	0.446	0.477993	0.134636
ENSG00000187537	ENSG00000222036	12	10	993.1	530.9	0.01	0.004	1.35	0.211746	0.0707412
ENSG00000187627	ENSG00000169629	13	10	4008.6	1238.4	0.03	0.025	1.102	9.66901e-05	4.84086e-05
ENSG00000187701	ENSG00000227152	9	4	692.8	177.2	0.01	0.024	0.245	0.32573	0.100509
ENSG00000187754	ENSG00000241476	11	10	411.8	152.2	0.08	0.09	0.908	0.0968918	0.035654
ENSG00000187837	ENSG00000168298	1	0	444.6	188.4	0.08	2.339	0.033	0	0
ENSG00000187866	ENSG00000156504	5	0	564	225	0.19	1.865	0.101	0	0
ENSG00000187969	ENSG00000169714	5	0	315.7	119.3	0.21	1.393	0.153	7.57336e-06	4.04216e-06
ENSG00000187990	ENSG00000168242	2	0	292.7	85.3	0	1.332	0.001	0	0
ENSG00000188021	ENSG00000135018	5	1	1246.8	487.2	0.1	1.062	0.099	0	0
ENSG00000188033	ENSG00000196826	6	5	1092.9	329.1	0.24	0.753	0.319	0.00136582	0.000638822
ENSG00000188050	ENSG00000235631	3	0	662.3	240.7	0.31	1.706	0.183	5.3848e-09	3.43032e-09
ENSG00000188092	ENSG00000117262	11	8	1072.4	292.6	0	0.004	0.001	0.138006	0.0493528
ENSG00000188152	ENSG00000130950	12	6	1526.9	696.1	0	0.011	0.409	0.699431	0.180953
ENSG00000188155	ENSG00000205441	6	3	887.3	207.7	0.06	0.161	0.353	0.181917	0.0625392
ENSG00000188199	ENSG00000184923	10	7	1774.3	859.7	0.01	0.005	2.129	0.0034392	0.00154359
ENSG00000188269	ENSG00000127515	11	4	639.5	263.5	0.11	0.216	0.496	0.97269	0.231742
ENSG00000188295	ENSG00000135747	7	6	835.9	226.1	0.24	0.604	0.404	0.225547	0.0740983
ENSG00000188379	ENSG00000120242	4	3	407.5	156.5	0.1	0.203	0.484	0.908538	0.218804
ENSG00000188386	ENSG00000221823	4	0	383.3	126.7	0.09	2.836	0.033	0	0
ENSG00000188581	ENSG00000221880	4	3	387.8	113.2	0.02	0.137	0.181	0.0277702	0.0108956
ENSG00000188624	ENSG00000204866	9	5	243.6	80.4	0.29	0.514	0.563	0.695912	0.180565
ENSG00000188626	ENSG00000153666	12	10	1369.2	526.8	0.01	0.019	0.667	0.493875	0.137368
ENSG00000189037	ENSG00000167065	5	1	432.3	131.7	0.18	1.077	0.167	9.90269e-07	5.48299e-07
ENSG00000189108	ENSG00000169306	1	0	1549.5	508.5	0.25	3.651	0.068	0	0
ENSG00000189134	ENSG00000101882	4	0	901.4	289.6	0.23	1.013	0.231	1.26821e-07	7.43906e-08
ENSG00000189144	ENSG00000197050	7	5	1547.9	372.1	0.33	1.114	0.293	3.80484e-05	1.96014e-05
ENSG00000189180	ENSG00000196693	6	5	1740.8	581.2	0.03	0.053	0.608	0.424538	0.121852
ENSG00000189221	ENSG00000069535	1	0	1162.6	373.4	0.18	1.648	0.108	0	0
ENSG00000189280	ENSG00000189433	1	0	559.4	118.6	0.22	2.475	0.088	1.71984e-11	1.21782e-11
ENSG00000189326	ENSG00000189252	8	5	196.1	88.9	0.36	0.196	1.815	0.0004983	0.000240665
ENSG00000189366	ENSG00000033011	12	0	328.9	142.1	0.03	0.053	0.599	0.721967	0.184896
ENSG00000189369	ENSG00000103342	5	0	1352.7	501.3	0.06	0.387	0.15	8.88178e-16	7.73818e-16
ENSG00000196098	ENSG00000206536	4	3	671.3	261.7	0.14	0.369	0.372	0.112676	0.0410376
ENSG00000196126	ENSG00000198502	5	3	608.4	189.6	0.07	0.08	0.833	0.105308	0.0385913
ENSG00000196226	ENSG00000197846	1	0	298	80	0.01	0.941	0.011	0	0
ENSG00000196230	ENSG00000188229	1	0	1092.8	236.2	0.01	4.837	0.003	0	0
ENSG00000196312	ENSG00000148110	12	0	294	105	0	0.011	0.303	0.725653	0.185572
ENSG00000196313	ENSG00000135213	10	3	2495.7	1182.3	0.02	0.026	0.593	0.486771	0.135817
ENSG00000196331	ENSG00000197846	5	0	312.7	65.3	0.01	0.88	0.007	0	0
ENSG00000196344	ENSG00000196616	1	0	818.7	303.3	0.21	1.214	0.172	1.26855e-11	9.05478e-12
ENSG00000196374	ENSG00000185130	5	1	317.8	60.2	0.02	1.547	0.013	0	0
ENSG00000196376	ENSG00000110660	1	0	700	266	0.3	2.327	0.131	1.3467e-13	1.05909e-13
ENSG00000196387	ENSG00000196357	5	4	1041.1	320.9	0.33	1.525	0.216	1.18523e-09	7.74468e-10
ENSG00000196411	ENSG00000182580	3	0	2258.1	588.9	0.28	3.26	0.085	0	0
ENSG00000196418	ENSG00000135747	8	6	780	213	0.25	0.7	0.358	0.0615825	0.0230913
ENSG00000196466	ENSG00000180855	9	4	1480.9	448.1	0.04	0.046	0.755	0.144105	0.0513272
ENSG00000196475	ENSG00000198814	5	1	1226.8	432.2	0.06	0.4	0.157	1.4122e-13	1.10571e-13
ENSG00000196502	ENSG00000197165	7	0	701.5	183.5	0.02	0.085	0.244	0.06739	0.0252157
ENSG00000196600	ENSG00000149742	6	4	1132.1	466.9	0.17	0.21	0.821	0.000887631	0.000422953
ENSG00000196611	ENSG00000118113	3	1	1025.4	336.6	0.34	1.447	0.232	8.64479e-08	5.12156e-08
ENSG00000196622	ENSG00000196934	13	10	3742.8	1174.2	0	0.001	3.754	0.0113223	0.0047461
ENSG00000196646	ENSG00000249709	6	4	1264.2	337.8	0.24	0.625	0.381	0.0409211	0.0158454
ENSG00000196659	ENSG00000197557	5	0	1420.7	571.3	0.02	0.086	0.277	0.0186617	0.00760734
ENSG00000196805	ENSG00000203785	4	3	120.3	95.7	0.02	0.019	1.038	0.482657	0.135398
ENSG00000196812	ENSG00000235109	5	4	744.7	272.3	0.38	1.559	0.245	5.66732e-05	2.88617e-05
ENSG00000196911	ENSG00000025800	2	0	1214.4	393.6	0.09	3.817	0.024	0	0
ENSG00000196936	ENSG00000198128	7	5	641.5	294.5	0.02	0.051	0.471	0.87656	0.212253
ENSG00000196981	ENSG00000196363	5	0	718.1	268.9	0.08	1.026	0.073	0	0
ENSG00000197008	ENSG00000196247	9	8	595	170	0.16	0.243	0.641	0.297333	0.0923882
ENSG00000197044	ENSG00000197933	7	4	1284.3	359.7	0.18	0.392	0.47	0.666759	0.175045
ENSG00000197084	ENSG00000196734	6	3	279.9	74.1	0.01	0.163	0.089	0.00312718	0.00141426
ENSG00000197454	ENSG00000203663	6	5	652.7	283.3	0.05	0.104	0.496	0.978475	0.232808
ENSG00000197459	ENSG00000185130	2	1	323	55	0.01	1.57	0.006	0	0
ENSG00000197465	ENSG00000170180	12	4	151.8	58.2	0.09	0.039	2.394	0.018877	0.0076775
ENSG00000197479	ENSG00000120328	8	0	1755.3	629.7	0.06	0.207	0.291	0.000218495	0.000107573
ENSG00000197620	ENSG00000197021	6	0	342.6	131.4	0.01	0.015	0.583	0.869678	0.211741
ENSG00000197714	ENSG00000178229	5	4	1094.2	384.8	0.17	0.464	0.375	0.0434967	0.0167334
ENSG00000197808	ENSG00000142065	5	4	1241.9	327.1	0.28	0.972	0.292	9.88131e-05	4.93326e-05
ENSG00000197837	ENSG00000196176	5	0	235.5	73.5	0	2.115	0.001	0	0
ENSG00000197838	ENSG00000198077	9	0	1196.1	285.9	0.04	0.159	0.241	0.00177788	0.000825035
ENSG00000197888	ENSG00000196620	11	5	1138.3	451.7	0.03	0.053	0.561	0.691802	0.18022
ENSG00000197953	ENSG00000114771	4	1	910.3	280.7	0.39	2.272	0.17	9.98235e-11	6.85018e-11
ENSG00000198019	ENSG00000150337	13	3	449.5	129.5	0.01	0.046	0.311	0.447858	0.126953
ENSG00000198062	ENSG00000222036	13	10	1046.9	477.1	0.01	0.002	4.087	0.011926	0.00498742
ENSG00000198099	ENSG00000197894	5	0	823.9	283.1	0.29	1.994	0.144	2.97762e-13	2.291e-13
ENSG00000198173	ENSG00000185448	8	6	1225.4	502.6	0.27	0.276	0.97	3.57001e-07	2.04681e-07
ENSG00000198182	ENSG00000187187	6	5	1722.8	362.2	0.33	1.15	0.286	3.63182e-06	1.95605e-06
ENSG00000198189	ENSG00000170509	3	1	666.1	227.9	0.25	1.772	0.139	2.13329e-12	1.5931e-12
ENSG00000198205	ENSG00000198455	5	4	1774.2	622.8	0.02	0.047	0.339	0.156441	0.055112
ENSG00000198225	ENSG00000088832	10	0	239.1	84.9	0.02	0.013	1.675	0.222148	0.0732705
ENSG00000198327	ENSG00000197238	4	3	230.5	78.5	0	4.362	0.001	0	0
ENSG00000198336	ENSG00000160808	3	0	467.3	114.7	0.11	1.728	0.063	0	0
ENSG00000198366	ENSG00000124693	5	1	296.9	111.1	0	1.577	0.001	0	0
ENSG00000198420	ENSG00000170379	4	0	2027.8	714.2	0.24	0.833	0.284	1.75857e-09	1.13245e-09
ENSG00000198453	ENSG00000196437	5	4	1404.8	371.2	0.15	0.833	0.184	1.07248e-13	8.50958e-14
ENSG00000198466	ENSG00000173480	9	4	1344.9	380.1	0.01	0.014	0.599	0.747669	0.189978
ENSG00000198471	ENSG00000175077	5	3	573.8	89.2	0.09	0.549	0.16	3.50512e-05	1.81626e-05
ENSG00000198518	ENSG00000158406	8	0	218.3	90.7	0	0.573	0.001	3.55271e-15	2.96449e-15
ENSG00000198535	ENSG00000205502	4	1	796.2	199.8	0.07	0.28	0.257	0.00395419	0.00176138
ENSG00000198563	ENSG00000123136	3	0	1005.2	275.8	0.05	3.987	0.013	0	0
ENSG00000198601	ENSG00000162727	12	11	681.8	245.2	0.04	0.117	0.381	0.352069	0.106265
ENSG00000198704	ENSG00000211445	5	0	477	171	0.2	0.937	0.217	4.38619e-05	2.24661e-05
ENSG00000198739	ENSG00000176204	1	0	1281.2	416.8	0.27	4.941	0.055	0	0
ENSG00000198754	ENSG00000083720	5	0	1143.6	404.4	0.14	2.876	0.05	0	0
ENSG00000198818	ENSG00000213064	1	0	356.6	120.4	0.25	2.544	0.1	8.27712e-10	5.46885e-10
ENSG00000203668	ENSG00000188419	5	1	1462.2	484.8	0.17	0.768	0.221	6.50691e-12	4.73973e-12
ENSG00000203690	ENSG00000166984	5	2	710.9	267.1	0.01	0.012	1.187	0.172563	0.0596695
ENSG00000203814	ENSG00000197459	5	2	322.4	55.6	0	1.691	0.002	0	0
ENSG00000203924	ENSG00000189252	8	5	294.8	116.2	0.13	0.161	0.785	0.208163	0.0698068
ENSG00000203995	ENSG00000162378	4	0	1558.7	610.3	0.28	1.713	0.162	0	0
ENSG00000204020	ENSG00000107798	4	2	903	285	0.41	2.354	0.172	5.59253e-10	3.75087e-10
ENSG00000204021	ENSG00000182333	4	2	898.8	286.2	0.25	1.097	0.229	9.82849e-08	5.80349e-08
ENSG00000204149	ENSG00000172650	12	11	1512.1	545.9	0.02	0.021	0.83	0.157418	0.0552933
ENSG00000204179	ENSG00000183675	13	2	836.8	423.2	0	0.002	0.001	0.240098	0.0781564
ENSG00000204293	ENSG00000196661	11	4	615.3	323.7	0.01	0.016	0.711	0.551557	0.149893
ENSG00000204363	ENSG00000203924	10	8	159.3	56.7	0.18	0.099	1.822	0.0194509	0.00787487
ENSG00000204389	ENSG00000204388	5	0	1720.4	202.6	0	0.021	0.001	0.000251689	0.000123573
ENSG00000204486	ENSG00000204478	13	7	966.7	458.3	0	0.002	0.001	0.242134	0.0785316
ENSG00000204495	ENSG00000120952	13	10	1033.3	388.7	0.04	0.058	0.685	0.261918	0.083128
ENSG00000204518	ENSG00000188984	1	0	769.8	277.2	0.34	1.812	0.189	2.55866e-08	1.57903e-08
ENSG00000204520	ENSG00000204516	9	8	735.3	245.7	0.11	0.115	0.945	0.00774954	0.00333499
ENSG00000204572	ENSG00000241598	5	4	412.3	190.7	0.07	0.163	0.442	0.718218	0.184201
ENSG00000204592	ENSG00000234745	7	5	846.6	215.4	0.13	0.288	0.441	0.519469	0.1427
ENSG00000204688	ENSG00000204657	11	4	697.5	238.5	0.07	0.258	0.287	0.013529	0.00561812
ENSG00000204703	ENSG00000168131	4	3	654.4	266.6	0.16	1.252	0.131	2.10942e-15	1.80248e-15
ENSG00000204779	ENSG00000184659	13	12	933.6	314.4	0	0.013	0.168	0.192402	0.0648886
ENSG00000204790	ENSG00000196873	12	11	888.8	296.2	0	0.007	0.504	0.993421	0.234793
ENSG00000205045	ENSG00000172123	8	5	1247.6	426.4	0.15	0.202	0.754	0.0138646	0.00573072
ENSG00000205078	ENSG00000171772	5	4	493.6	139.4	0.33	1.028	0.317	0.0509958	0.0193668
ENSG00000205111	ENSG00000100490	3	0	753.7	251.3	0.25	4.356	0.058	0	0
ENSG00000205186	ENSG00000147588	4	1	300	96	0.22	4.338	0.051	3.03372e-10	2.05016e-10
ENSG00000205246	ENSG00000168028	7	0	666.9	218.1	0	0.005	0.906	0.596088	0.159315
ENSG00000205279	ENSG00000233932	1	0	147.1	50.9	0.27	1.473	0.186	0.00901346	0.00384171
ENSG00000205318	ENSG00000111846	4	1	680.5	228.5	0.4	1.317	0.305	0.00370625	0.00165509
ENSG00000205329	ENSG00000205330	5	4	650.8	276.2	0.17	2.738	0.061	0	0
ENSG00000205413	ENSG00000177409	4	0	3624.1	1088.9	0.27	1.106	0.247	0	0
ENSG00000205445	ENSG00000221837	5	3	598.6	166.4	0.06	0.197	0.298	0.0805374	0.0298835
ENSG00000205497	ENSG00000205496	12	11	641.1	297.9	0.02	0.017	0.933	0.254501	0.0816487
ENSG00000205595	ENSG00000109321	13	1	512.8	243.2	0	0.004	0.001	0.224446	0.0738731
ENSG00000205667	ENSG00000006756	1	0	1247.7	423.3	0.26	2.654	0.097	0	0
ENSG00000205810	ENSG00000205809	5	3	514.5	157.5	0.04	0.044	0.809	0.316428	0.0981498
ENSG00000205981	ENSG00000120675	2	1	266.7	75.3	0.31	4.003	0.077	3.97001e-08	2.40821e-08
ENSG00000206531	ENSG00000163606	4	3	563.6	210.4	0.17	0.28	0.604	0.357254	0.106895
ENSG00000212122	ENSG00000206203	4	2	839.3	159.7	0.16	1.648	0.096	0	0
ENSG00000212643	ENSG00000169249	9	0	1085.8	333.2	0.03	0.072	0.406	0.498762	0.13851
ENSG00000212710	ENSG00000258941	5	0	1707.9	521.1	0.06	0.104	0.531	0.756915	0.191414
ENSG00000212721	ENSG00000204880	5	4	473.7	81.3	0.04	0.107	0.396	0.616157	0.163695
ENSG00000212747	ENSG00000134590	6	5	281.8	57.2	0.03	0.27	0.109	0.00207935	0.000957434
ENSG00000212807	ENSG00000221970	13	4	683.8	246.2	0	0.004	0.001	0.190227	0.0646458
ENSG00000212938	ENSG00000184724	5	4	147.6	65.4	0.16	0.048	3.381	0.00183819	0.000850803
ENSG00000212993	ENSG00000204531	5	1	779.3	297.7	0.02	0.032	0.58	0.732974	0.187175
ENSG00000213214	ENSG00000050327	9	1	978.6	455.4	0.01	0.006	0.805	0.523505	0.143587
ENSG00000213416	ENSG00000198090	4	3	504.4	83.6	0.02	0.27	0.087	9.57311e-05	4.81104e-05
ENSG00000213516	ENSG00000147274	8	0	872.8	297.2	0.02	0.049	0.43	0.686347	0.179392
ENSG00000213714	ENSG00000124103	4	3	364.4	148.6	0.07	0.09	0.778	0.256993	0.0822452
ENSG00000213759	ENSG00000135226	12	10	1146.7	440.3	0.03	0.042	0.635	0.4421	0.125521
ENSG00000213762	ENSG00000197128	4	3	872.3	291.7	0.26	0.552	0.475	0.743752	0.189655
ENSG00000213967	ENSG00000213096	9	8	1456.6	451.4	0.11	0.271	0.409	0.191279	0.0647009
ENSG00000214415	ENSG00000134183	2	0	812.3	249.7	0.12	3.213	0.037	0	0
ENSG00000214491	ENSG00000133488	5	3	943.7	241.3	0.13	0.671	0.188	1.42303e-08	8.84334e-09
ENSG00000214518	ENSG00000212725	4	3	347.6	36.4	0.01	0.035	0.166	0.406921	0.11779
ENSG00000214562	ENSG00000184923	11	7	1649.2	747.8	0.01	0.007	0.743	0.486641	0.135817
ENSG00000215568	ENSG00000033327	8	0	614.2	204.8	0.2	0.355	0.559	0.582604	0.156417
ENSG00000218823	ENSG00000090060	5	1	1348.6	520.4	0.07	0.464	0.156	1.11022e-16	9.96584e-17
ENSG00000221867	ENSG00000197172	9	7	651.1	290.9	0.02	0.014	1.61	0.0268892	0.0105967
ENSG00000221937	ENSG00000236398	3	2	694.4	253.6	0.31	0.745	0.421	0.328263	0.100766
ENSG00000221968	ENSG00000134824	3	1	1096.1	232.9	0.24	2.87	0.084	0	0
ENSG00000221986	ENSG00000133055	4	2	800.3	219.7	0.2	1.787	0.114	0	0
ENSG00000222014	ENSG00000175582	11	1	450.2	173.8	0.04	0.03	1.374	0.0361972	0.0140776
ENSG00000222038	ENSG00000196834	13	12	2113.1	1000.9	0	0.003	0.955	0.354579	0.106274
ENSG00000223547	ENSG00000171295	5	4	1296.8	374.2	0.34	0.584	0.575	0.289486	0.0912256
ENSG00000224389	ENSG00000244731	4	3	4001.5	1230.5	0	0.003	1.019	0.258878	0.0824755
ENSG00000224586	ENSG00000211445	5	0	476	172	0.21	0.989	0.214	2.52244e-05	1.31473e-05
ENSG00000224689	ENSG00000171466	9	4	865.4	295.6	0.07	0.092	0.716	0.162728	0.0569336
ENSG00000225899	ENSG00000205097	10	9	568	269	0.01	0.004	1.922	0.185579	0.0635017
ENSG00000226209	ENSG00000176731	10	1	215.6	78.4	0.12	0.132	0.906	0.164486	0.0574355
ENSG00000226372	ENSG00000189186	8	5	1289.1	507.9	0.12	0.135	0.906	0.000341858	0.000166922
ENSG00000226479	ENSG00000155984	5	0	740	310	0.06	1.725	0.034	0	0
ENSG00000226650	ENSG00000090889	8	1	2604.5	1091.5	0.03	0.075	0.41	0.250837	0.0807648
ENSG00000226784	ENSG00000171314	12	0	544.6	217.4	0.02	0.009	2.266	0.0245381	0.00980055
ENSG00000227234	ENSG00000196406	13	11	219.5	71.5	0.13	0.048	2.653	0.00437209	0.00194266
ENSG00000228083	ENSG00000147873	6	3	405.5	161.5	0.08	0.146	0.529	0.860495	0.209792
ENSG00000228278	ENSG00000229314	13	3	398.6	183.4	0.01	0.006	1.334	0.366506	0.109296
ENSG00000228532	ENSG00000188612	10	0	182.2	102.8	0.01	0.02	0.29	0.650852	0.171629
ENSG00000228570	ENSG00000188199	12	10	1826	808	0.01	0.001	4.507	0.00610514	0.00265953
ENSG00000229644	ENSG00000105835	12	0	1040	376	0	0.021	0.137	0.0468285	0.0178989
ENSG00000229833	ENSG00000090520	3	0	175.1	43.9	0.01	0.027	0.207	0.548923	0.149406
ENSG00000229924	ENSG00000171847	13	12	963.1	428.9	0.03	0.046	0.722	0.215656	0.0715099
ENSG00000229937	ENSG00000147224	5	0	675.8	275.2	0.03	0.251	0.111	1.25791e-08	7.9001e-09
ENSG00000230301	ENSG00000236032	11	4	651.2	272.8	0.07	0.149	0.462	0.749345	0.189991
ENSG00000230453	ENSG00000180071	12	9	2178.1	794.9	0.03	0.033	0.982	0.00658434	0.00284734
ENSG00000230657	ENSG00000251655	9	5	379	215	0.13	0.124	1.035	0.0102848	0.00433165
ENSG00000230797	ENSG00000100811	5	0	863.1	240.9	0.28	0.908	0.303	0.00104191	0.000491199
ENSG00000231213	ENSG00000188313	1	0	554	178	0.27	1.751	0.156	4.59905e-10	3.09623e-10
ENSG00000231861	ENSG00000232382	5	4	633.5	287.5	0.03	0.063	0.454	0.787911	0.197251
ENSG00000232629	ENSG00000179344	4	2	615.3	173.7	0.11	0.157	0.699	0.191482	0.0647009
ENSG00000233224	ENSG00000196866	5	0	303.1	86.9	0	1.268	0.003	0	0
ENSG00000233608	ENSG00000122691	1	0	431.3	48.7	0.09	4.168	0.021	0	0
ENSG00000233701	ENSG00000184814	6	5	574.1	208.9	0.08	0.096	0.784	0.116385	0.0423016
ENSG00000233822	ENSG00000185130	2	1	338.4	39.6	0.01	0.848	0.011	9.83658e-14	7.87517e-14
ENSG00000236029	ENSG00000154529	13	9	618.2	248.8	0.01	0.008	0.997	0.396562	0.115167
ENSG00000236637	ENSG00000186803	6	5	441.3	125.7	0.02	0.017	1.063	0.328261	0.100766
ENSG00000236761	ENSG00000225932	13	9	1718.8	612.2	0	0.005	0.928	0.352157	0.106265
ENSG00000238244	ENSG00000139112	9	1	260.6	90.4	0.03	0.099	0.321	0.417745	0.120336
ENSG00000240053	ENSG00000263020	5	0	447.8	137.2	0	0.007	0.313	0.748226	0.189978
ENSG00000240257	ENSG00000241465	13	12	248.9	99.1	0.02	0.025	0.743	0.659303	0.173343
ENSG00000240654	ENSG00000205863	10	0	656.7	339.3	0.01	0.015	0.733	0.513429	0.141478
ENSG00000241233	ENSG00000196224	5	3	382	179	0.04	0.091	0.401	0.623241	0.16533
ENSG00000241563	ENSG00000251503	3	1	178.1	46.9	0.03	0.046	0.619	0.805632	0.200265
ENSG00000241852	ENSG00000248235	3	1	557.4	198.6	0.02	0.038	0.436	0.807787	0.200265
ENSG00000242013	ENSG00000124422	5	0	963.7	269.3	0.08	1.245	0.06	0	0
ENSG00000242220	ENSG00000203690	9	5	379.9	178.1	0.14	0.108	1.26	0.00185507	0.000856386
ENSG00000242616	ENSG00000244115	1	0	116.3	39.7	0.1	0.128	0.762	0.486084	0.135817
ENSG00000243480	ENSG00000240038	6	0	1164.9	368.1	0.01	0.055	0.114	0.000515692	0.000248389
ENSG00000243709	ENSG00000143768	3	0	939.8	158.2	0.02	0.085	0.247	0.0719102	0.0267382
ENSG00000244067	ENSG00000243955	6	2	483.7	182.3	0.03	0.058	0.442	0.789422	0.197337
ENSG00000244411	ENSG00000241598	7	4	296.4	198.6	0.02	0.087	0.243	0.191132	0.0647009
ENSG00000244509	ENSG00000243811	7	6	414	144	0.13	0.056	2.273	3.60779e-05	1.86402e-05
ENSG00000244693	ENSG00000225932	13	9	1832.2	498.8	0	0.002	1.007	0.516993	0.14224
ENSG00000247746	ENSG00000124422	5	0	1156.2	373.8	0.18	1.833	0.096	0	0
ENSG00000248483	ENSG00000204531	5	1	700.6	256.4	0.35	0.849	0.413	0.212207	0.0707623
ENSG00000249222	ENSG00000167283	9	0	215.6	84.4	0.06	0.087	0.643	0.612117	0.162865
ENSG00000250254	ENSG00000164611	8	2	380.9	153.1	0.05	0.112	0.431	0.69046	0.180202
ENSG00000250361	ENSG00000170180	10	4	192.3	68.7	0.08	0.024	3.215	0.0159401	0.00654291
ENSG00000250479	ENSG00000106153	1	0	295.4	121.6	0.31	3.992	0.079	3.9238e-08	2.38832e-08
ENSG00000250565	ENSG00000131100	5	0	490.4	181.6	0.15	1.328	0.11	1.54299e-12	1.16204e-12
ENSG00000253379	ENSG00000260916	2	0	97.2	55.8	0.22	0.243	0.921	0.15641	0.055112
ENSG00000253506	ENSG00000196531	9	0	450.9	194.1	0.06	0.071	0.781	0.222202	0.0732705
ENSG00000253548	ENSG00000022556	8	5	211.7	58.3	0.19	0.342	0.547	0.807895	0.200265
ENSG00000253626	ENSG00000132507	9	4	339.4	122.6	0.01	0.018	0.505	0.991333	0.234793
ENSG00000253797	ENSG00000156697	6	1	1585.4	706.6	0.05	0.075	0.671	0.131609	0.0471598
ENSG00000254535	ENSG00000090621	5	0	845.7	261.3	0.13	0.993	0.136	9.99201e-16	8.66299e-16
ENSG00000254598	ENSG00000101266	13	0	841.8	331.2	0.01	0.006	1.15	0.296322	0.0922352
ENSG00000254834	ENSG00000255012	12	1	671.3	273.7	0.02	0.045	0.519	0.926776	0.222593
ENSG00000254997	ENSG00000241233	6	5	343	143	0.07	0.232	0.32	0.257286	0.0822452
ENSG00000255150	ENSG00000107672	5	0	686.7	249.3	0.41	0.931	0.444	0.482982	0.135398
ENSG00000255221	ENSG00000137752	9	4	239.2	90.8	0.1	0.087	1.195	0.0440263	0.0169005
ENSG00000255398	ENSG00000182782	10	0	866.8	219.2	0.02	0.048	0.446	0.7813	0.196134
ENSG00000255800	ENSG00000257019	10	4	673.4	280.6	0.04	0.051	0.772	0.213268	0.0708502
ENSG00000256223	ENSG00000167384	5	3	1255.9	361.1	0.33	1.028	0.32	0.000688911	0.000330926
ENSG00000257062	ENSG00000257046	4	0	194.5	69.5	0.02	0.024	0.97	0.502903	0.139225
ENSG00000257482	ENSG00000234444	10	8	977.5	300.5	0.09	0.099	0.902	0.0149715	0.00615957
ENSG00000257743	ENSG00000257335	4	1	4039.1	1345.9	0.24	1.369	0.178	0	0
ENSG00000259243	ENSG00000215749	13	11	1044.7	563.3	0	0.005	0.966	0.360826	0.107783
ENSG00000260027	ENSG00000122592	2	0	504	114	0.24	3.07	0.079	1.73128e-12	1.29834e-12
ENSG00000261701	ENSG00000257017	9	4	773.1	267.9	0.04	0.051	0.886	0.0850509	0.0314925
ENSG00000263563	ENSG00000170315	7	0	526.6	160.4	0.03	0.145	0.18	0.0051294	0.0022566
ENSG00000263809	ENSG00000161970	5	0	262.6	52.4	0	0.039	0.001	0.0249607	0.00990257
ENSG00000267889	ENSG00000243317	9	3	103.6	37.4	0.02	0.086	0.232	0.429071	0.122802
ENSG00000268133	ENSG00000269533	5	4	213.3	92.7	0.2	0.237	0.843	0.11786	0.0425765
ENSG00000268412	ENSG00000173113	12	0	277.1	97.9	0.03	0.11	0.268	0.219697	0.0727142
ENSG00000268744	ENSG00000268870	10	9	100.6	37.4	0.04	0.159	0.263	0.37347	0.11063
ENSG00000268750	ENSG00000173480	9	4	411	87	0	0.026	0.001	0.0229972	0.00920577
ENSG00000268797	ENSG00000269858	5	0	112.8	31.2	0.14	0.234	0.593	0.797469	0.198789
ENSG00000268942	ENSG00000173207	13	1	137.5	99.5	0	0.01	0.001	0.293729	0.091911
ENSG00000269026	ENSG00000196724	5	4	308.1	108.9	0.22	0.412	0.524	0.858648	0.20963
ENSG00000269099	ENSG00000130592	12	0	102.3	32.7	0.01	0.033	0.313	0.745462	0.189819
ENSG00000269383	ENSG00000172115	10	1	215.2	75.8	0.15	0.099	1.559	0.0105709	0.0044416
ENSG00000269404	ENSG00000142539	1	0	612.2	152.8	0	0.005	0.43	0.93733	0.224824
ENSG00000269449	ENSG00000214919	5	4	215.4	99.6	0.21	0.233	0.886	0.0688087	0.0256925
ENSG00000270033	ENSG00000170832	12	0	132.1	50.9	0.01	0.023	0.327	0.767388	0.193462
ENSG00000271321	ENSG00000271079	13	9	1742.6	588.4	0	0.004	0.656	0.757111	0.191414
ENSG00000272325	ENSG00000270800	2	0	347.8	108.2	0.1	0.08	1.225	0.0418952	0.0161873

## Sheet: Supplemental_Table_S6
Supplemental Table S6. Branch Ka/Ks test for primate-specific protein-coding genes (PSGs)
Four significant (Ka/Ks<1) genes are possible pseudogenes according to olfactory receptor database, which are highlighted in light yellow. They were removed subsequently. Orthologous genes annotated in Ensembl are shown here.
Child Gene Ensembl ID	Parent Gene Ensembl ID	Child Branch	Parent Branch	N	S	Ka	Ks	Ka/Ks	P	q	mm10	rn5	cavPor3	oryCun2	canFam3	equCab2	bosTau7	loxAfr3	monDom5	galGal3
ENSG00000174957	ENSG00000172464	12	1	628.8	235.2	0.3408	2.671	0.1276	0	0	ENSMUSP00000058242	NA	NA	NA	ENSCAFP00000011846	NA	NA	ENSLAFP00000023407	ENSMODP00000025066	Prediction
ENSG00000177489	ENSG00000188558	12	4	678.7	260.3	0.23	1.3415	0.1715	0	0	NA	NA	NA	NA	ENSCAFP00000033124	NA	NA	NA	ENSMODP00000006998	NA
ENSG00000181958	ENSG00000237388	12	3	419.5	174.5	0.2279	0.8848	0.2576	1.826e-08	1.03708e-07	NA	NA	NA	NA	ENSCAFP00000033604	NA	NA	ENSLAFP00000018919	Prediction	NA
ENSG00000197263	ENSG00000196341	11	4	646.4	268.6	0.1641	1.3268	0.1237	0	0	NA	NA	NA	NA	ENSCAFP00000038272	NA	NA	ENSLAFP00000021810	ENSMODP00000033767	NA
ENSG00000010438	ENSG00000204983	11	0	424.4	112.6	0.0374	0.0574	0.6516	0.6345	0.572541	NA	NA	NA	NA	ENSCAFP00000021363	NA	NA	NA	Prediction	Prediction
ENSG00000026950	ENSG00000111801	8	0	709	278	0.0722	0.0579	1.2456	0.546	0.527171	NA	NA	NA	NA	NA	Prediction	NA	NA	Prediction	NA
ENSG00000066813	ENSG00000183747	12	2	1244	475	0.0079	0.0088	0.9012	0.8767	0.656176	NA	NA	NA	NA	ENSCAFP00000026561	NA	NA	ENSLAFP00000009046	ENSMODP00000008466	NA
ENSG00000072444	ENSG00000188611	13	0	1373.7	489.3	0.015	0.0165	0.9115	0.8573	0.649912	NA	NA	NA	NA	NA	NA	ENSBTAP00000004585	NA	ENSMODP00000020586	NA
ENSG00000089335	ENSG00000197841	8	5	916.9	280.1	0.0341	0.0612	0.5567	0.09764	0.149639	NA	NA	NA	NA	NA	NA	ENSBTAP00000054562	NA	NA	NA
ENSG00000100068	ENSG00000162337	10	0	588.7	167.3	0.1092	0.316	0.3456	0.0003345	0.00115345	NA	NA	NA	NA	ENSCAFP00000016050	NA	NA	ENSLAFP00000023664	NA	Prediction
ENSG00000102069	ENSG00000177889	9	0	310.4	115.6	0.0332	0.0665	0.4992	0.1848	0.239092	NA	NA	NA	NA	ENSCAFP00000040182	NA	NA	Prediction	ENSMODP00000011806	Prediction
ENSG00000105352	ENSG00000170956	9	3	519.3	209.7	0.141	0.1632	0.8639	0.5962	0.558874	NA	NA	NA	NA	NA	Prediction	NA	ENSLAFP00000019011	NA	NA
ENSG00000105889	ENSG00000164647	12	1	475.6	190.4	0.0346	0.0421	0.8216	0.694	0.584934	NA	NA	NA	NA	Prediction	NA	NA	Prediction	ENSMODP00000013043	ENSGALP00000014639
ENSG00000107018	ENSG00000107014	10	5	340.8	118.2	0.0697	0.0673	1.0361	0.9458	0.685015	NA	NA	NA	NA	ENSCAFP00000031075	NA	NA	ENSLAFP00000014604	NA	NA
ENSG00000108448	ENSG00000221926	10	0	748.1	214.9	0.011	0.0176	0.6237	0.5268	0.519013	NA	NA	NA	NA	NA	NA	Prediction	ENSLAFP00000014104	ENSMODP00000009305	NA
ENSG00000109181	ENSG00000156096	9	3	1169	412	0.0537	0.1025	0.5244	0.01909	0.0460792	NA	NA	NA	NA	NA	NA	Prediction	Prediction	NA	NA
ENSG00000110203	ENSG00000165457	8	3	516.3	131.7	0.2259	0.8357	0.2704	3.196e-08	1.6556e-07	NA	NA	NA	NA	ENSCAFP00000008634	NA	NA	ENSLAFP00000019934	Prediction	NA
ENSG00000110900	ENSG00000177697	8	0	628.4	127.6	0.2893	4.35	0.0665	0	0	NA	NA	NA	NA	NA	NA	ENSBTAP00000051660	NA	Prediction	ENSGALP00000038261
ENSG00000111843	ENSG00000137210	8	2	167.8	75.2	0.0015	0.0085	0.1784	0.6715	0.584934	NA	NA	NA	NA	NA	NA	Prediction	ENSLAFP00000008210	NA	Prediction
ENSG00000121388	ENSG00000198752	9	0	183.8	53.2	0.1561	0.1186	1.3163	0.6939	0.584934	NA	NA	NA	NA	ENSCAFP00000026841	NA	NA	ENSLAFP00000023911	ENSMODP00000016766	ENSGALP00000018621
ENSG00000122728	ENSG00000147133	9	0	3883.5	1333.5	0.0249	0.0549	0.454	1.172e-05	4.71493e-05	NA	NA	NA	NA	NA	ENSECAP00000005777	NA	ENSLAFP00000021978	ENSMODP00000005636	ENSGALP00000008763
ENSG00000123594	ENSG00000066427	8	0	754	245	0.1469	0.4031	0.3644	2.577e-07	1.24407e-06	NA	NA	NA	NA	NA	NA	ENSBTAP00000007611	ENSLAFP00000004090	ENSMODP00000002446	ENSGALP00000017488
ENSG00000126752	ENSG00000171483	13	5	264.4	83.6	0.0382	0.0115	3.3296	0.2945	0.334522	NA	NA	NA	NA	ENSCAFP00000022566	NA	NA	ENSLAFP00000003781	NA	NA
ENSG00000132517	ENSG00000185803	8	0	882.3	398.7	0.0386	0.0961	0.402	0.004638	0.0139939	NA	NA	NA	NA	ENSCAFP00000002314	NA	NA	ENSLAFP00000028187	ENSMODP00000013417	NA
ENSG00000133433	ENSG00000099984	12	5	568.4	163.6	0	0.0109	0.0001	0.07046	0.121482	NA	NA	NA	NA	ENSCAFP00000020705	NA	NA	NA	NA	NA
ENSG00000133475	ENSG00000100031	12	0	1315.7	385.3	0.0269	0.0595	0.4525	0.01287	0.0335843	NA	NA	NA	NA	ENSCAFP00000020481	NA	NA	ENSLAFP00000012279	NA	ENSGALP00000010584
ENSG00000135702	ENSG00000183196	8	3	966.6	197.4	0.0747	0.2577	0.2899	0.0005201	0.0017316	NA	NA	NA	NA	ENSCAFP00000029749	NA	NA	ENSLAFP00000007104	ENSMODP00000002643	NA
ENSG00000136682	ENSG00000172785	12	0	445.6	169.4	0.006	0.0278	0.2161	0.06108	0.113411	NA	NA	NA	NA	NA	ENSECAP00000012034	NA	ENSLAFP00000005609	NA	Prediction
ENSG00000139223	ENSG00000140350	10	0	297.1	89.9	0.0563	0.1057	0.5319	0.2112	0.254896	NA	NA	NA	NA	NA	NA	Prediction	ENSLAFP00000028947	ENSMODP00000034653	NA
ENSG00000139797	ENSG00000125352	8	0	743.9	213.1	0.1425	0.6937	0.2055	2.22e-16	1.94858e-15	NA	NA	NA	NA	NA	NA	ENSBTAP00000011446	ENSLAFP00000011638	Prediction	NA
ENSG00000141437	ENSG00000122696	9	0	650.6	240.4	0.0172	0.016	1.0769	0.9122	0.677494	NA	NA	NA	NA	ENSCAFP00000003471	NA	NA	ENSLAFP00000001832	ENSMODP00000037355	NA
ENSG00000144134	ENSG00000079974	12	0	395.1	117.9	0.0027	0.0032	0.8305	0.9573	0.685015	NA	NA	NA	NA	NA	NA	Prediction	ENSLAFP00000006047	ENSMODP00000013574	ENSGALP00000015873
ENSG00000144199	ENSG00000115042	11	3	679.9	262.1	0.0067	0.0167	0.403	0.3628	0.38921	NA	NA	NA	NA	NA	NA	ENSBTAP00000015354	NA	NA	NA
ENSG00000145736	ENSG00000183474	12	0	473	154	0	0.0062	0.0001	0.1522	0.206974	NA	NA	NA	NA	NA	ENSECAP00000006252	NA	ENSLAFP00000008581	Prediction	Prediction
ENSG00000149531	ENSG00000109536	11	0	420.4	125.6	0.0833	0.169	0.4927	0.04589	0.0923072	NA	NA	NA	NA	Prediction	NA	NA	ENSLAFP00000009363	Prediction	NA
ENSG00000151033	ENSG00000120563	8	3	340.1	103.9	0.0093	0.0542	0.1718	0.02605	0.0596149	NA	NA	NA	NA	ENSCAFP00000005897	NA	NA	ENSLAFP00000012485	NA	NA
ENSG00000151846	ENSG00000070756	8	0	974.7	348.3	0.0269	0.0644	0.4172	0.008097	0.021716	NA	NA	NA	NA	ENSCAFP00000000810	NA	NA	ENSLAFP00000018594	Prediction	Prediction
ENSG00000159455	ENSG00000187180	8	4	194.5	66.5	0.0103	0.0279	0.369	0.609	0.563733	NA	NA	NA	NA	NA	Prediction	NA	Prediction	NA	NA
ENSG00000161133	ENSG00000184979	9	3	716.2	246.8	0.0407	0.0539	0.7559	0.5105	0.508139	NA	NA	NA	NA	ENSCAFP00000023954	NA	NA	ENSLAFP00000004108	ENSMODP00000023032	NA
ENSG00000161807	ENSG00000170923	11	5	668.1	264.9	0.1022	0.208	0.4914	0.01544	0.0382245	NA	NA	NA	NA	NA	NA	ENSBTAP00000023807	NA	NA	NA
ENSG00000162727	ENSG00000177186	11	4	671	262	0.0132	0.0186	0.7078	0.6789	0.584934	NA	NA	NA	NA	ENSCAFP00000032708	NA	NA	Prediction	ENSMODP00000004779	NA
ENSG00000162747	ENSG00000203747	12	5	505.3	178.7	0.0121	0.0113	1.075	0.9293	0.684926	NA	NA	NA	NA	NA	ENSECAP00000005110	NA	ENSLAFP00000010494	NA	NA
ENSG00000163098	ENSG00000101966	10	0	470.6	147.4	0.0829	0.2651	0.3128	3.779e-05	0.000145947	NA	NA	NA	NA	Prediction	NA	NA	Prediction	ENSMODP00000018720	ENSGALP00000038337
ENSG00000163374	ENSG00000116580	8	0	1827.1	752.9	0.1097	0.1501	0.7308	0.04135	0.0849447	NA	NA	NA	NA	NA	NA	Prediction	ENSLAFP00000004361	Prediction	ENSGALP00000023557
ENSG00000163735	ENSG00000124875	8	4	219.8	77.2	0.0629	0.0468	1.3458	0.7633	0.614148	NA	NA	NA	NA	ENSCAFP00000034480	NA	NA	ENSLAFP00000015094	NA	NA
ENSG00000163737	ENSG00000109272	8	5	230.1	72.9	0.014	0.0144	0.9721	0.9871	0.690623	NA	NA	NA	NA	NA	ENSECAP00000010335	NA	ENSLAFP00000009276	NA	NA
ENSG00000164556	ENSG00000186973	8	3	224.2	78.8	0.038	0.265	0.1434	3.999e-05	0.000148504	NA	NA	NA	NA	NA	ENSECAP00000008864	NA	ENSLAFP00000015657	ENSMODP00000014271	NA
ENSG00000165055	ENSG00000087995	10	0	673.6	232.4	0.0018	0.0044	0.4207	0.682	0.584934	NA	NA	NA	NA	ENSCAFP00000019703	NA	NA	ENSLAFP00000009391	ENSMODP00000012855	ENSGALP00000000540
ENSG00000165059	ENSG00000072062	8	0	795	216	0.0757	0.4919	0.1538	0	0	NA	NA	NA	NA	NA	NA	ENSBTAP00000008727	ENSLAFP00000020656	Prediction	NA
ENSG00000166840	ENSG00000156689	10	4	647.4	216.6	0.3531	1.287	0.2743	4.319e-11	2.78004e-10	NA	NA	NA	NA	NA	NA	ENSBTAP00000041176	ENSLAFP00000006075	ENSMODP00000025226	NA
ENSG00000166926	ENSG00000110077	9	4	312.7	125.3	0.0701	0.0341	2.0564	0.2279	0.271655	NA	NA	NA	NA	ENSCAFP00000015239	NA	NA	ENSLAFP00000011787	NA	NA
ENSG00000169715	ENSG00000205362	8	6	148.5	34.5	0.0076	0.0699	0.1083	0.1845	0.239092	NA	NA	NA	NA	NA	Prediction	NA	NA	NA	NA
ENSG00000170848	ENSG00000243130	10	4	376.5	130.5	0.0358	0.0183	1.9568	0.5424	0.527171	NA	NA	NA	NA	Prediction	NA	NA	ENSLAFP00000019011	Prediction	NA
ENSG00000171471	ENSG00000140941	12	1	279.3	95.7	0.0036	0.0111	0.3193	0.4326	0.444342	NA	NA	NA	NA	ENSCAFP00000029489	NA	NA	ENSLAFP00000017352	ENSMODP00000005540	Prediction
ENSG00000171928	ENSG00000175106	10	0	422.3	162.7	0.0024	0.0028	0.8481	0.9547	0.685015	NA	NA	NA	NA	NA	NA	ENSBTAP00000034933	ENSLAFP00000003224	ENSMODP00000038505	NA
ENSG00000171989	ENSG00000166800	8	3	738.3	257.7	0.0517	0.1896	0.2726	3.403e-06	1.54746e-05	NA	NA	NA	NA	NA	NA	NA	ENSLAFP00000003066	Prediction	NA
ENSG00000173262	ENSG00000059804	8	1	953.1	375.9	0.0239	0.0243	0.9852	0.9753	0.687348	NA	NA	NA	NA	NA	ENSECAP00000022301	NA	ENSLAFP00000003698	ENSMODP00000022418	Prediction
ENSG00000173272	ENSG00000152082	12	0	214.4	64.6	0.0225	0.0168	1.3381	0.7857	0.626946	NA	NA	NA	NA	NA	Prediction	NA	Prediction	NA	ENSGALP00000004000
ENSG00000174353	ENSG00000066923	13	1	439.6	169.4	0.1076	0.1783	0.6032	0.09966	0.150349	NA	NA	NA	NA	ENSCAFP00000021415	NA	NA	ENSLAFP00000011742	ENSMODP00000005469	NA
ENSG00000176134	ENSG00000120254	12	1	176.4	69.6	0.0765	0.1818	0.4208	0.07862	0.129854	NA	NA	NA	NA	NA	NA	ENSBTAP00000052260	Prediction	ENSMODP00000020931	ENSGALP00000020258
ENSG00000176540	ENSG00000181903	12	1	610	260	0.2312	1.4644	0.1579	0	0	NA	ENSRNOP00000039375	NA	NA	ENSCAFP00000012074	NA	NA	ENSLAFP00000022270	ENSMODP00000024902	NA
ENSG00000177257	ENSG00000171711	12	5	134.2	57.8	0	0.0194	0.0001	0.1048	0.155671	NA	NA	NA	NA	NA	NA	Prediction	NA	NA	NA
ENSG00000177476	ENSG00000188558	12	4	665.7	261.3	0.2267	1.8324	0.1237	0	0	NA	NA	NA	NA	ENSCAFP00000033124	NA	NA	NA	ENSMODP00000006998	NA
ENSG00000177990	ENSG00000173852	12	0	1430	517	0.2061	0.8087	0.2548	0	0	NA	NA	NA	NA	NA	NA	ENSBTAP00000007607	ENSLAFP00000006714	ENSMODP00000000071	NA
ENSG00000178935	ENSG00000269343	9	4	613.9	178.1	0.0461	0.0238	1.9351	0.3582	0.388593	NA	NA	NA	NA	NA	ENSECAP00000000336	NA	NA	Prediction	NA
ENSG00000179817	ENSG00000170255	9	1	634.6	205.4	0.0823	0.0327	2.5157	0.1399	0.194896	NA	NA	NA	NA	NA	NA	NA	ENSLAFP00000020366	NA	Prediction
ENSG00000180138	ENSG00000113712	8	0	742.8	265.2	0.0459	0.1924	0.2384	1.822e-08	1.03708e-07	NA	NA	NA	NA	Prediction	NA	NA	Prediction	ENSMODP00000012444	Prediction
ENSG00000180389	ENSG00000124172	10	1	114.5	38.5	0.027	0.0202	1.3394	0.8454	0.647814	NA	NA	NA	NA	NA	ENSECAP00000022733	NA	ENSLAFP00000000247	ENSMODP00000020726	NA
ENSG00000180574	ENSG00000130741	10	0	1035.4	380.6	0.0071	0.0228	0.3101	0.06044	0.113411	NA	NA	NA	NA	ENSCAFP00000019787	NA	NA	ENSLAFP00000009248	ENSMODP00000009354	ENSGALP00000026307
ENSG00000181626	ENSG00000107890	8	4	1067.3	324.7	0.2585	0.2451	1.0546	0.7956	0.629642	NA	NA	NA	NA	NA	NA	Prediction	Prediction	Prediction	NA
ENSG00000181896	ENSG00000198551	8	3	744.9	200.1	0.2558	0.782	0.3271	4.763e-06	1.99945e-05	NA	NA	NA	NA	NA	Prediction	NA	NA	NA	NA
ENSG00000182890	ENSG00000148672	10	0	944.9	357.1	0.0179	0.0091	1.9605	0.3429	0.380546	NA	NA	NA	NA	NA	NA	Prediction	ENSLAFP00000010079	NA	ENSGALP00000003139
ENSG00000183269	ENSG00000205409	12	4	653	265	0.0192	0.1279	0.1502	3.526e-06	1.54746e-05	NA	NA	NA	NA	Prediction	NA	NA	NA	Prediction	NA
ENSG00000183434	ENSG00000198176	8	0	894.4	317.6	0.1426	0.1549	0.9205	0.7307	0.597889	NA	NA	NA	NA	ENSCAFP00000009562	NA	NA	Prediction	ENSMODP00000004575	ENSGALP00000027109
ENSG00000183706	ENSG00000176294	13	4	650.3	267.7	0.045	0.1052	0.4276	0.02157	0.0507955	NA	NA	NA	NA	NA	NA	ENSBTAP00000054480	NA	Prediction	NA
ENSG00000184022	ENSG00000196944	8	4	659.3	243.7	0.1391	0.751	0.1852	5.107e-15	4.10907e-14	NA	NA	NA	NA	Prediction	NA	NA	Prediction	ENSMODP00000030473	NA
ENSG00000185164	ENSG00000103226	12	1	2437	914	0.0004	0.0041	0.1012	0.064	0.11659	NA	NA	NA	NA	NA	NA	ENSBTAP00000043570	NA	Prediction	Prediction
ENSG00000185303	ENSG00000122852	8	2	467.1	192.9	0.0076	0.0192	0.3935	0.3368	0.378122	NA	NA	NA	NA	ENSCAFP00000036831	NA	NA	ENSLAFP00000001739	ENSMODP00000001836	NA
ENSG00000185684	ENSG00000183495	8	0	1018.7	385.3	0.1042	0.2214	0.4705	0.0001361	0.000486691	NA	NA	NA	NA	NA	NA	ENSBTAP00000027216	ENSLAFP00000012587	ENSMODP00000031933	ENSGALP00000003675
ENSG00000186160	ENSG00000186377	8	1	1120.7	394.3	0.2968	0.9012	0.3294	6.55e-15	4.86471e-14	NA	NA	NA	NA	ENSCAFP00000006090	NA	NA	ENSLAFP00000002487	NA	NA
ENSG00000187010	ENSG00000188672	12	1	906	330	0.0263	0.0113	2.3342	0.1413	0.194896	NA	NA	NA	NA	ENSCAFP00000018970	NA	NA	ENSLAFP00000024376	ENSMODP00000017481	NA
ENSG00000187372	ENSG00000113212	8	0	1332.8	479.2	0.1695	0.7324	0.2314	0	0	NA	NA	NA	NA	NA	NA	ENSBTAP00000056528	Prediction	NA	Prediction
ENSG00000188152	ENSG00000130950	12	6	1042.1	430.9	0.009	0.0275	0.3271	0.03046	0.0668399	NA	NA	NA	NA	NA	ENSECAP00000007204	NA	NA	NA	NA
ENSG00000188269	ENSG00000127515	11	4	642.1	263.9	0.0639	0.1357	0.4707	0.0135	0.0343012	NA	NA	NA	NA	Prediction	NA	NA	NA	Prediction	NA
ENSG00000188624	ENSG00000204866	9	5	245	88	0.1125	0.2903	0.3875	0.02655	0.0596149	NA	NA	NA	NA	Prediction	NA	NA	Prediction	NA	NA
ENSG00000189366	ENSG00000033011	12	0	341.8	132.2	0.0299	0.0472	0.633	0.4057	0.421193	NA	NA	NA	NA	ENSCAFP00000028202	NA	NA	ENSLAFP00000010351	ENSMODP00000007326	NA
ENSG00000196312	ENSG00000148110	12	0	232.8	109.2	0.0981	0.1202	0.8155	0.6189	0.563733	NA	NA	NA	NA	ENSCAFP00000003396	NA	NA	ENSLAFP00000012925	ENSMODP00000000977	NA
ENSG00000196578	ENSG00000197938	11	4	659.1	261.9	0.176	0.7871	0.2237	2.603e-12	1.79517e-11	NA	NA	NA	NA	NA	NA	Prediction	NA	Prediction	NA
ENSG00000197465	ENSG00000170180	12	4	171.5	62.5	0.1994	0.1037	1.9228	0.2651	0.304712	NA	NA	NA	NA	Prediction	NA	NA	NA	NA	NA
ENSG00000197479	ENSG00000120328	8	0	1775.8	609.2	0.0307	0.1088	0.2819	3.258e-08	1.6556e-07	NA	NA	NA	NA	NA	Prediction	NA	ENSLAFP00000019589	NA	NA
ENSG00000197838	ENSG00000198077	9	0	777.5	221.5	0.004	0.0525	0.0754	0.005101	0.0149245	NA	NA	NA	NA	NA	Prediction	NA	Prediction	ENSMODP00000010210	Prediction
ENSG00000197888	ENSG00000196620	11	5	1166.1	414.9	0.0079	0.004	1.9776	0.6786	0.584934	NA	NA	NA	NA	NA	NA	Prediction	NA	NA	NA
ENSG00000198019	ENSG00000150337	13	3	492.6	200.4	0.0209	0.0265	0.7896	0.6967	0.584934	NA	NA	NA	NA	ENSCAFP00000016903	NA	NA	Prediction	NA	NA
ENSG00000198466	ENSG00000173480	9	4	1257.4	380.6	0.0043	0.0041	1.0576	0.9708	0.687348	NA	NA	NA	NA	Prediction	ENSECAP00000000336	NA	Prediction	NA	NA
ENSG00000198518	ENSG00000158406	8	0	228.8	80.2	0	0.23	0.0001	0.1332	0.19195	NA	NA	NA	NA	ENSCAFP00000042617	NA	NA	Prediction	NA	NA
ENSG00000204118	ENSG00000186462	11	5	158.7	54.3	0.2485	0.7454	0.3334	0.002617	0.00842251	NA	NA	NA	NA	ENSCAFP00000025316	NA	NA	ENSLAFP00000022409	NA	NA
ENSG00000204179	ENSG00000183675	13	2	701.8	249.2	0	0.0042	0.0001	0.2374	0.279528	NA	NA	NA	NA	NA	NA	Prediction	Prediction	NA	NA
ENSG00000204293	ENSG00000196661	11	4	668	244	0.009	0.0119	0.7591	0.7369	0.597889	NA	NA	NA	NA	ENSCAFP00000016571	NA	NA	NA	Prediction	NA
ENSG00000204688	ENSG00000204657	11	4	330.3	134.7	0.0666	0.1843	0.3612	0.004007	0.0124801	NA	NA	NA	NA	NA	NA	Prediction	Prediction	Prediction	NA
ENSG00000205045	ENSG00000172123	8	5	732.1	251.9	0.0602	0.0959	0.6274	0.1676	0.22475	NA	NA	NA	NA	NA	ENSECAP00000014715	NA	ENSLAFP00000017425	NA	NA
ENSG00000205595	ENSG00000109321	13	1	510.4	176.6	0	0.006	0.0001	0.09342	0.146322	NA	NA	NA	NA	ENSCAFP00000004574	NA	NA	ENSLAFP00000011649	ENSMODP00000023962	NA
ENSG00000205864	ENSG00000241233	13	5	261.5	95.5	0.0151	0.0958	0.158	0.005278	0.0149882	NA	NA	NA	NA	NA	Prediction	NA	Prediction	NA	NA
ENSG00000212124	ENSG00000226761	12	6	640.4	256.6	0.1291	0.0967	1.3346	0.348	0.381817	NA	NA	NA	NA	NA	Prediction	NA	NA	NA	NA
ENSG00000212643	ENSG00000169249	9	0	1038.8	317.2	0.0237	0.0462	0.5123	0.1184	0.173207	NA	NA	NA	NA	NA	NA	Prediction	Prediction	ENSMODP00000021460	ENSGALP00000026660
ENSG00000213214	ENSG00000050327	9	1	936.7	404.3	0.0101	0.0245	0.4117	0.09396	0.146322	NA	NA	NA	NA	ENSCAFP00000005216	NA	NA	NA	ENSMODP00000002001	0
ENSG00000213516	ENSG00000147274	8	0	729.6	278.4	0.0195	0.0234	0.8329	0.732	0.597889	NA	NA	NA	NA	ENSCAFP00000027996	NA	NA	ENSLAFP00000026253	ENSMODP00000017573	ENSGALP00000010414
ENSG00000214860	ENSG00000167880	9	0	532.8	76.2	0.0166	0.1364	0.1219	0.00556405	0.0153491	NA	NA	NA	NA	ENSCAFP00000007474	NA	NA	ENSLAFP00000014539	Prediction	ENSGALP00000003285
ENSG00000215009	ENSG00000005187	8	1	1278.8	449.2	0.2714	1.6542	0.1641	0	0	NA	NA	NA	NA	NA	ENSECAP00000005111	NA	ENSLAFP00000005164	ENSMODP00000008698	ENSGALP00000003439
ENSG00000215568	ENSG00000033327	8	0	1107.3	347.7	0.2139	0.3021	0.7081	0.03473	0.0745163	NA	NA	NA	NA	ENSCAFP00000007132	NA	NA	ENSLAFP00000029280	ENSMODP00000005825	Prediction
ENSG00000221867	ENSG00000197172	9	7	677.2	243.8	0.017	0.0149	1.1433	0.8397	0.647814	NA	NA	NA	Prediction	NA	NA	NA	NA	NA	NA
ENSG00000224689	ENSG00000171466	9	4	698	199	0.0322	0.0274	1.1757	0.8157	0.640301	NA	NA	NA	NA	NA	Prediction	NA	NA	NA	NA
ENSG00000226209	ENSG00000176731	10	1	211.3	70.7	0.09	0.1376	0.6544	0.3827	0.401633	NA	NA	NA	NA	Prediction	NA	NA	ENSLAFP00000023982	ENSMODP00000036557	NA
ENSG00000226372	ENSG00000189186	8	5	1202.8	453.2	0.0681	0.0603	1.1281	0.6586	0.584934	NA	NA	NA	NA	NA	ENSECAP00000011117	NA	ENSLAFP00000023631	NA	NA
ENSG00000226650	ENSG00000090889	8	1	2573.2	894.8	0.0232	0.0357	0.6508	0.08939	0.143846	NA	NA	NA	NA	NA	Prediction	NA	Prediction	ENSMODP00000005988	ENSGALP00000006656
ENSG00000226784	ENSG00000171314	12	0	463.5	160.5	0.0203	0.0062	3.2649	0.1937	0.242883	NA	NA	NA	NA	Prediction	NA	NA	ENSLAFP00000025184	NA	ENSGALP00000038677
ENSG00000228278	ENSG00000229314	13	3	258.1	62.9	0.0299	0.0477	0.6273	0.6168	0.563733	NA	NA	NA	NA	ENSCAFP00000004937	NA	NA	Prediction	NA	NA
ENSG00000228532	ENSG00000188612	10	0	211.6	73.4	0.0048	0.0283	0.1688	0.1352	0.191967	NA	NA	NA	NA	Prediction	NA	NA	Prediction	ENSMODP00000035531	ENSGALP00000012928
ENSG00000229644	ENSG00000105835	12	0	277	83	0	0.0172	0.0001	0.07935	0.129854	NA	NA	NA	NA	ENSCAFP00000005927	NA	NA	ENSLAFP00000027395	ENSMODP00000040659	ENSGALP00000013129
ENSG00000230301	ENSG00000236032	11	4	397.4	151.6	0.0452	0.087	0.5199	0.2046	0.253262	NA	NA	NA	NA	NA	Prediction	NA	NA	Prediction	NA
ENSG00000230657	ENSG00000251655	9	5	342.5	206.5	0.0966	0.0894	1.0808	0.8417	0.647814	NA	NA	NA	NA	NA	Prediction	NA	NA	NA	NA
ENSG00000238244	ENSG00000139112	9	1	268.5	82.5	0.0308	0.0985	0.3125	0.03905	0.0819638	NA	NA	NA	NA	Prediction	NA	NA	ENSLAFP00000002970	ENSMODP00000022766	Prediction
ENSG00000240654	ENSG00000205863	10	0	705.9	290.1	0.0014	0.0121	0.1156	0.07461	0.126381	NA	NA	NA	NA	ENSCAFP00000010560	NA	NA	ENSLAFP00000027906	ENSMODP00000010557	ENSGALP00000027601
ENSG00000249222	ENSG00000167283	9	0	219.3	80.7	0.0494	0.0695	0.7107	0.5546	0.530173	NA	NA	NA	NA	Prediction	NA	NA	Prediction	Prediction	ENSGALP00000011160
ENSG00000250254	ENSG00000164611	8	2	387.1	140.9	0.0771	0.1266	0.6087	0.1882	0.239092	NA	NA	NA	NA	NA	ENSECAP00000007521	NA	ENSLAFP00000009317	ENSMODP00000009870	ENSGALP00000002289
ENSG00000250361	ENSG00000170180	10	4	194.4	69.6	0.0834	0.0186	4.4881	0.06631	0.118562	NA	NA	NA	NA	Prediction	NA	NA	NA	NA	NA
ENSG00000253506	ENSG00000196531	9	0	340.8	139.2	0.0479	0.0437	1.0962	0.8616	0.649912	NA	NA	NA	NA	NA	ENSECAP00000012848	NA	Prediction	ENSMODP00000024778	Prediction
ENSG00000253548	ENSG00000022556	8	5	216.8	74.2	0.129	0.1247	1.0344	0.9578	0.685015	NA	NA	NA	NA	ENSCAFP00000003831	NA	NA	Prediction	NA	NA
ENSG00000254598	ENSG00000101266	13	0	858	315	0.0071	0.0033	2.166	0.443	0.44645	NA	NA	NA	NA	ENSCAFP00000010339	NA	NA	ENSLAFP00000002609	ENSMODP00000024355	ENSGALP00000042162
ENSG00000254834	ENSG00000255012	12	1	659.6	240.4	0.0059	0.0166	0.3567	0.2505	0.291399	NA	NA	ENSCPOP00000015754	NA	Prediction	NA	NA	Prediction	Prediction	Prediction
[truncated: 9 more rows]

## Sheet: Supplemental_Table_S7
Supplemental Table S7. Polymorphism-based test for protein-coding genes
[truncated: 19,473 more rows]

## Sheet: Supplemental_Table_S8
Supplemental Table S8. Unique-mapping spectrum count for protein-coding genes
[truncated: 119,872 more rows]

[truncated: 9 more sheets: Supplemental_Table_S9, Supplemental_Table_S10, Supplemental_Table_S11, Supplemental_Table_S12, Supplemental_Table_S13, Supplemental_Table_S14, Supplemental_Table_S15, Supplemental_Table_S16, Supplemental_Table_S17]
